# Supplementary material
Source: Research Square preprint supplement (doi:10.21203/rs.3.rs-9003051/v1)
Supplement: Supplementary file 1 [file 7ceece7d0c1c2b6f5aea82f7.xlsx]

## Sheet: Differential_analysis_MC1283_ce
Q:\SHARED\Kiran\MC1286_PE\Astral_runs\MC1283_PE1_DIA_1.raw	Q:\SHARED\Kiran\MC1286_PE\Astral_runs\MC1283_PE1_DIA_2.raw	Q:\SHARED\Kiran\MC1286_PE\Astral_runs\MC1283_PE1_DIA_3.raw	Q:\SHARED\Kiran\MC1286_PE\Astral_runs\MC1283_PE3_DIA_1.raw	Q:\SHARED\Kiran\MC1286_PE\Astral_runs\MC1283_PE3_DIA_2.raw	Q:\SHARED\Kiran\MC1286_PE\Astral_runs\MC1283_PE3_DIA_3.raw	Q:\SHARED\Kiran\MC1286_PE\Astral_runs\MC1283_PE7_DIA_1.raw	Q:\SHARED\Kiran\MC1286_PE\Astral_runs\MC1283_PE7_DIA_2.raw	Q:\SHARED\Kiran\MC1286_PE\Astral_runs\MC1283_PE7_DIA_3.raw	Student's T-test Significant PE3_PE1	Student's T-test Significant PE7_PE1	Student's T-test significant	N.Sequences	N.Proteotypic.Sequences	Number Of Imputations	-Log Student's T-test p-value PE3_PE1	Student's T-test q-value PE3_PE1	Student's T-test Difference PE3_PE1	Student's T-test Test statistic PE3_PE1	-Log Student's T-test p-value PE7_PE1	Student's T-test q-value PE7_PE1	Student's T-test Difference PE7_PE1	Student's T-test Test statistic PE7_PE1	Protein.Group	Protein.Names	Genes	First.Protein.Description
PE1	PE1	PE1	PE3	PE3	PE3	PE7	PE7	PE7
20.425	20.398	20.509	20.7282	20.396	20.3335	20.6316	20.5707	20.7186		+	PE7_PE1	3	1	0	0.120346	0.872864	0.0418917	0.329981	1.64681	0.010477	0.196312	3.61023	A0A024RBG1	NUD4B_HUMAN	NUDT4B	Diphosphoinositol polyphosphate phosphohydrolase NUDT4B
20.7606	20.7736	20.458	20.6946	20.6949	20.4365	20.5673	20.7094	20.6243				4	4	0	0.154215	0.831767	-0.055411	-0.412522	0.0979686	0.898726	-0.0303713	-0.273441	A0A096LP01	SIM26_HUMAN	SMIM26	Small integral membrane protein 26
30.4785	30.363	30.3581	22.5688	22.5171	22.6842	21.2111	21.2091	21.4229	+	+	PE3_PE1;PE7_PE1	1	0	0	7.59108	0	-7.80986	-123.669	7.42565	0	-9.11885	-112.433	A0A0B4J1Y9	HV372_HUMAN	IGHV3-72	Immunoglobulin heavy variable 3-72
19.7862	20.2858	20.7071	20.9215	21.1013	21.1145	20.4184	20.9246	20.5518	+		PE3_PE1	1	1	0	1.34474	0.019009	0.786084	2.8756	0.535456	0.179638	0.371877	1.21425	A0A0B4J2F0	PIOS1_HUMAN	PIGBOS1	Protein PIGBOS1
20.6988	20.6791	20.4071	21.3219	20.6116	20.1879	20.8761	21.5213	20.9048		+	PE7_PE1	1	0	0	0.11876	0.874961	0.112135	0.326028	1.03018	0.043782	0.505744	2.19389	A0A1W2PR75;A0A1W2PQJ5	S72L3_HUMAN;S72L6_HUMAN	SSU72L3;SSU72L6	RNA polymerase II subunit A C-terminal domain phosphatase SSU72 like protein 3
15.9174	16.6684	18.5371	18.0158	18.1891	18.3582	17.7435	18.0875	18.2056				2	2	1	0.661743	0.113777	1.14676	1.46066	0.54237	0.175869	0.971293	1.2278	A0A3B3IRV3	MCTS2_HUMAN	MCTS2	Malignant T-cell-amplified sequence 2
21.6928	21.5929	21.75	20.3202	20.0771	20.2907	20.3304	20.3623	20.0995	+	+	PE3_PE1;PE7_PE1	13	11	0	4.07388	0	-1.44925	-16.2285	3.93194	0.000386643	-1.4145	-14.9385	A0AV96	RBM47_HUMAN	RBM47	RNA-binding protein 47
19.6917	20.0419	19.5602	19.4935	19.803	19.6958	20.1474	19.9938	19.6481				10	10	0	0.231939	0.692345	-0.100499	-0.59113	0.330001	0.424192	0.165184	0.801535	A0AVF1	IFT56_HUMAN	IFT56	Intraflagellar transport protein 56
18.098	17.868	17.9328	17.3745	17.4069	17.7315	17.8408	17.4719	17.3711	+	+	PE3_PE1;PE7_PE1	4	4	0	1.5937	0.0106652	-0.461992	-3.47422	1.20215	0.0285032	-0.405017	-2.5578	A0AVI4	TM129_HUMAN	TMEM129	E3 ubiquitin-protein ligase TM129
19.1916	19.7114	19.3145	19.175	19.1554	18.5432	19.2112	19.5915	19.3405				6	6	1	0.795895	0.0765423	-0.447983	-1.72296	0.0439756	0.958167	-0.0248038	-0.128843	A0AVK6	E2F8_HUMAN	E2F8	Transcription factor E2F8
23.7672	23.7173	23.7341	23.5139	23.5516	23.4721	23.4835	23.53	23.5128	+	+	PE3_PE1;PE7_PE1	52	52	0	2.94538	0.000496656	-0.226988	-8.33169	3.49331	0.000851806	-0.230717	-11.5482	A0AVT1	UBA6_HUMAN	UBA6	Ubiquitin-like modifier-activating enzyme 6
23.228	23.2809	23.241	23.2919	23.1832	23.2647	23.2527	23.2413	23.2136				23	23	0	0.0309731	0.970614	-0.00333977	-0.0919408	0.289514	0.529859	-0.0140921	-0.716236	A0FGR8	ESYT2_HUMAN	ESYT2	Extended synaptotagmin-2
18.1181	18.371	18.5282	18.8217	18.2749	18.7734	17.8947	18.679	18.8715				2	2	0	0.601197	0.139574	0.284253	1.34272	0.167238	0.805936	0.142666	0.44341	A0JLT2	MED19_HUMAN	MED19	Mediator of RNA polymerase II transcription subunit 19
23.0426	22.9413	23.115	22.7164	22.6408	22.7662	22.695	22.8357	22.8833	+	+	PE3_PE1;PE7_PE1	24	24	0	2.1953	0.00248339	-0.325171	-5.23126	1.4053	0.0172114	-0.228312	-3.01573	A0JNW5	BLT3B_HUMAN	BLTP3B	Bridge-like lipid transfer protein family member 3B
23.0557	22.9949	23.1694	22.6227	22.7283	22.6931	22.6642	22.6771	22.7009	+	+	PE3_PE1;PE7_PE1	6	6	0	2.55208	0.00128038	-0.39198	-6.55251	2.77482	0.00161409	-0.39259	-7.51339	A0PJW6	TM223_HUMAN	TMEM223	Transmembrane protein 223
18.8123	18.6138	18.6081	20.0111	20.2372	20.1823	20.0605	19.9714	20.1965	+	+	PE3_PE1;PE7_PE1	3	3	0	3.97594	0	1.46545	15.3273	3.92916	0.000385289	1.39804	14.9142	A0PK00	T120B_HUMAN	TMEM120B	Transmembrane protein 120B
22.3888	22.3582	22.3394	22.9773	22.901	22.962	22.9996	22.978	23.0315	+	+	PE3_PE1;PE7_PE1	20	20	0	4.54469	0	0.584614	21.3367	5.14766	0.000263736	0.640841	30.2457	A1L0T0	HACL2_HUMAN	ILVBL	2-hydroxyacyl-CoA lyase 2
19.9863	19.3144	19.7822	20.2243	19.9058	20.3024	20.281	20.0546	20.3788		+	PE7_PE1	3	3	0	0.900873	0.0572676	0.449895	1.93122	1.15805	0.0320158	0.543876	2.46263	A1L170	CA226_HUMAN	C1orf226	Uncharacterized protein C1orf226
20.2182	20.1796	20.1368	20.6374	20.7568	20.6736	20.7724	20.7375	20.7769	+	+	PE3_PE1;PE7_PE1	3	3	0	3.56358	0.000153942	0.511019	12.0366	4.59412	0.000150235	0.584044	21.9569	A1L188	NDUF8_HUMAN	NDUFAF8	NADH dehydrogenase [ubiquinone] 1 alpha subcomplex assembly factor 8
20.3895	20.7221	19.7157	19.7956	18.8516	19.8799	19.9369	20.2834	19.9992				2	2	0	0.799861	0.0756205	-0.766788	-1.73077	0.255927	0.626252	-0.202593	-0.643872	A1L3X0	ELOV7_HUMAN	ELOVL7	Very long chain fatty acid elongase 7
24.2707	24.1618	24.1556	24.4084	24.3758	24.3449	24.404	24.4245	24.4083	+	+	PE3_PE1;PE7_PE1	67	67	0	1.90877	0.00503523	0.180308	4.33126	2.33133	0.00313379	0.216202	5.70627	A2RRP1	NBAS_HUMAN	NBAS	NBAS subunit of NRZ tethering complex
20.6195	20.4959	20.6616	21.0926	21.0491	20.9475	21.0542	20.9688	21.0624	+	+	PE3_PE1;PE7_PE1	22	22	0	2.57698	0.00118595	0.437396	6.65434	2.7756	0.00161535	0.436155	7.51698	A2RTX5	SYTC2_HUMAN	TARS3	Threonine--tRNA ligase 2
21.001	21.0076	21.2037	21.0547	20.7628	20.8096	20.9243	21.397	20.7865				7	7	0	0.802863	0.0748442	-0.195075	-1.73668	0.0615765	0.939575	-0.0348574	-0.17741	A2RU49	HYKK_HUMAN	HYKK	Hydroxylysine kinase
17.2548	18.568	18.0748	20.0981	20.1038	19.9604	20.1283	20.2299	20.1785	+	+	PE3_PE1;PE7_PE1	9	9	0	2.24821	0.0021799	2.08824	5.41207	2.34652	0.00312645	2.21303	5.76142	A2RU67	F234B_HUMAN	FAM234B	Protein FAM234B
22.5525	22.2091	22.2853	22.6909	22.504	22.5281	22.5833	22.6569	22.5615		+	PE7_PE1	15	15	0	0.878032	0.0610323	0.225352	1.88558	1.09482	0.0370894	0.251569	2.32848	A2RUC4	TYW5_HUMAN	TYW5	tRNA wybutosine-synthesizing protein 5
23.0554	22.9912	22.958	20.5344	20.4434	20.3625	20.7129	20.6751	20.688	+	+	PE3_PE1;PE7_PE1	31	31	0	5.82075	0	-2.55475	-44.6028	6.72959	0.00266667	-2.30951	-75.3023	A2RUS2	DEND3_HUMAN	DENND3	DENN domain-containing protein 3
19.6119	19.2445	19.2379	19.1124	19.2559	18.8145	18.9288	19.2625	19.2659				10	10	0	0.781179	0.0797824	-0.303843	-1.69403	0.566241	0.162257	-0.212395	-1.2745	A2VDJ0	T131L_HUMAN	TMEM131L	Transmembrane protein 131-like
21.6814	21.6854	21.7005	21.6984	21.6669	21.6509	21.6856	21.7178	21.679				83	83	0	0.491062	0.204861	-0.0170358	-1.12692	0.140611	0.844896	0.00505892	0.379771	A3KMH1	VWA8_HUMAN	VWA8	von Willebrand factor A domain-containing protein 8
20.4806	20.4017	20.5739	19.6853	19.7187	19.784	19.6163	19.7534	19.7951	+	+	PE3_PE1;PE7_PE1	29	21	0	3.711	8.52234e-05	-0.756122	-13.126	3.31594	0.000858238	-0.763812	-10.3979	A3KN83	SBNO1_HUMAN	SBNO1	Protein strawberry notch homolog 1
21.5839	21.6746	21.6831	22.0299	22.0224	22.0637	22.026	22.0608	22.1207	+	+	PE3_PE1;PE7_PE1	25	25	0	3.47817	0.00014486	0.391446	11.4455	3.25396	0.000947368	0.421978	10.022	A4D1E9	GTPBA_HUMAN	GTPBP10	GTP-binding protein 10
20.4639	20.3835	20.2346	20.4689	20.4494	20.3919	20.5492	20.5998	20.5118		+	PE7_PE1	22	22	0	0.463023	0.228717	0.076114	1.0714	1.26026	0.0250887	0.192961	2.68538	A4D1P6	WDR91_HUMAN	WDR91	WD repeat-containing protein 91
30.6018	30.5395	30.4693	30.5182	30.4724	30.477	30.619	30.622	30.6238		+	PE7_PE1	3	0	0	0.510413	0.19055	-0.0476863	-1.16506	1.03946	0.0427801	0.0847073	2.21305	A5A3E0	POTEF_HUMAN	POTEF	POTE ankyrin domain family member F
18.891	18.8339	19.0039	19.4382	19.3641	19.4266	19.376	18.4171	19.5708	+		PE3_PE1	2	2	0	3.09103	0.000341284	0.500064	9.09368	0.230522	0.689769	0.211697	0.587984	A5D8V6	VP37C_HUMAN	VPS37C	Vacuolar protein sorting-associated protein 37C
21.2051	20.544	21.0176	22.5877	22.6016	22.6343	22.8062	22.484	22.753	+	+	PE3_PE1;PE7_PE1	7	7	0	2.98786	0.000467466	1.68565	8.54764	2.87288	0.00128601	1.75883	7.97451	A5PLL7	PDES1_HUMAN	PEDS1	Plasmanylethanolamine desaturase 1
21.4785	21.4561	21.1739	21.1061	21.0954	20.9793	21.0904	21.0802	21.1891	+	+	PE3_PE1;PE7_PE1	10	10	0	1.3617	0.0180371	-0.30922	-2.91451	1.12875	0.0346322	-0.249601	-2.40015	A5PLN9	TPC13_HUMAN	TRAPPC13	Trafficking protein particle complex subunit 13
22.8003	22.7683	22.7507	22.4873	22.4902	22.5055	22.5129	22.538	22.5602	+	+	PE3_PE1;PE7_PE1	84	84	0	4.24244	0	-0.278789	-17.902	3.53462	0.000801034	-0.236093	-11.8329	A5YKK6	CNOT1_HUMAN	CNOT1	CCR4-NOT transcription complex subunit 1
26.2899	26.2814	26.2798	23.3773	23.485	23.4046	23.6473	23.454	23.5297	+	+	PE3_PE1;PE7_PE1	68	68	0	7.00228	0	-2.86143	-88.1077	5.9707	0.000793388	-2.74005	-48.6304	A6NC98	CC88B_HUMAN	CCDC88B	Coiled-coil domain-containing protein 88B
21.8988	21.9023	22.0225	20.8412	20.726	20.8031	20.9219	20.7185	20.6608	+	+	PE3_PE1;PE7_PE1	3	0	0	4.57804	0	-1.15108	-21.7533	3.71945	0.000679583	-1.17416	-13.1913	A6NCE7;Q9GZQ8	MLP3B_HUMAN;MP3B2_HUMAN	MAP1LC3B;MAP1LC3B2	Microtubule-associated proteins 1A/1B light chain 3 beta 2
22.2326	22.353	22.3036	22.3358	22.3938	22.4056	22.2004	22.2808	22.3008				13	13	0	0.933739	0.0520984	0.0820103	1.99724	0.314253	0.460832	-0.0357278	-0.768582	A6NDG6	PGP_HUMAN	PGP	Glycerol-3-phosphate phosphatase
22.5277	22.5906	22.513	22.479	22.5385	22.5262	22.2145	22.5142	22.3529				11	11	0	0.415908	0.278407	-0.0292225	-0.97723	0.955228	0.0533683	-0.183236	-2.04067	A6NDU8	RIMC1_HUMAN	RIMOC1	RAB7A-interacting MON1-CCZ1 complex subunit 1
21.2905	20.9311	21.1208	20.1385	19.7198	19.791	19.9207	20.3772	19.9572	+	+	PE3_PE1;PE7_PE1	10	10	0	2.7548	0.000915973	-1.23103	-7.42225	2.33881	0.00314455	-1.02908	-5.73337	A6NED2	RCCD1_HUMAN	RCCD1	RCC1 domain-containing protein 1
28.4604	28.4365	28.4115	23.9823	24.0783	24.1141	24.0279	23.8667	24.0394	+	+	PE3_PE1;PE7_PE1	3	0	0	7.3023	0	-4.37789	-104.724	6.77986	0.00282353	-4.45813	-77.5144	A6NER3;Q4V321;O76087;P0CL80;P0CL81;P0CL82;P0DSO3;Q13069;Q13070	GAG13_HUMAN;GAGE4_HUMAN;GAGE5_HUMAN;GAGE6_HUMAN;GAGE7_HUMAN;GG12F_HUMAN;GG12G_HUMAN;GG12I_HUMAN;GG12J_HUMAN	GAGE12F;GAGE12G;GAGE12I;GAGE12J;GAGE13;GAGE4;GAGE5;GAGE6;GAGE7	G antigen 12J
19.337	19.5818	19.5644	19.3421	18.9907	19.6789	19.8117	19.3024	19.3795				7	7	0	0.298463	0.503666	-0.157156	-0.735258	0.00642664	0.994046	0.00346692	0.0195868	A6NFI3	ZN316_HUMAN	ZNF316	Zinc finger protein 316
18.1269	17.9975	17.8838	17.2254	17.1572	16.9025	17.1674	17.3515	17.4138	+	+	PE3_PE1;PE7_PE1	2	2	1	2.77525	0.000828801	-0.907728	-7.51536	2.60781	0.00201498	-0.691872	-6.78229	A6NFY7	SDHF1_HUMAN	SDHAF1	Succinate dehydrogenase assembly factor 1
23.2092	23.4793	23.2891	23.8109	23.5427	23.7706	23.1003	23.3139	23.265	+		PE3_PE1	2	2	0	1.52519	0.0127526	0.382222	3.30331	0.410517	0.2888	-0.0994746	-0.966373	A6NHL2	TBAL3_HUMAN	TUBAL3	Tubulin alpha chain-like 3
23.694	23.6185	23.6544	22.9894	22.9588	22.9502	23.0102	23.025	23.0018	+	+	PE3_PE1;PE7_PE1	103	103	0	4.99777	0	-0.689509	-27.7359	5.02421	0.000234146	-0.643293	-28.1631	A6NHR9	SMHD1_HUMAN	SMCHD1	Structural maintenance of chromosomes flexible hinge domain-containing protein 1
18.8704	19.1917	19.1782	19.1795	18.7035	18.9774	18.9234	19.026	18.9661				11	11	0	0.296375	0.509549	-0.126659	-0.73083	0.42351	0.272636	-0.108243	-0.992508	A6NI79	CCD69_HUMAN	CCDC69	Coiled-coil domain-containing protein 69
22.6445	22.6372	22.6133	22.7724	22.6323	22.7508	22.705	22.7573	22.7744		+	PE7_PE1	9	8	0	0.909653	0.0558372	0.0868543	1.94881	2.11814	0.00423576	0.113902	4.97612	A6NIH7	U119B_HUMAN	UNC119B	Protein unc-119 homolog B
20.5897	20.5847	20.6125	20.4489	20.1337	20.363	20.3709	20.473	20.4954	+	+	PE3_PE1;PE7_PE1	7	6	0	1.38518	0.0174158	-0.280429	-2.96882	1.71928	0.00892636	-0.149217	-3.80107	A6NJ78	MET15_HUMAN	METTL15	12S rRNA N4-methylcytidine (m4C) methyltransferase
19.7739	20.0788	19.548	20.0626	20.551	20.199	20.5581	20.5272	20.5851	+	+	PE3_PE1;PE7_PE1	4	4	0	1.04422	0.039617	0.470661	2.22291	2.09145	0.00441573	0.756598	4.89013	A6NK58	LIPT2_HUMAN	LIPT2	Octanoyl-[acyl-carrier-protein]:protein N-octanoyltransferase LIPT2
18.5806	18.6785	18.4554	18.9801	18.7413	19.2553	19.0985	18.8657	19.4315	+	+	PE3_PE1;PE7_PE1	4	4	0	1.2206	0.0255721	0.420732	2.59802	1.47293	0.0147284	0.560359	3.17623	A6NKF1	SAC31_HUMAN	SAC3D1	SAC3 domain-containing protein 1
22.3247	22.1162	22.1092	20.3161	20.6239	20.369	20.447	20.5934	20.4304	+	+	PE3_PE1;PE7_PE1	3	0	0	3.91043	0	-1.74706	-14.7519	4.37367	0.000243655	-1.69307	-19.3208	A6QL64;Q8N2N9	AN36A_HUMAN;AN36B_HUMAN	ANKRD36;ANKRD36B	Ankyrin repeat domain-containing protein 36A
19.5498	18.7006	19.3567	19.1001	19.2493	19.3463	19.2465	19.55	19.5062				4	2	0	0.0375448	0.963841	0.0295366	0.110707	0.351723	0.379903	0.231877	0.846561	A6ZKI3	RTL8C_HUMAN	RTL8C	Retrotransposon Gag-like protein 8C
21.9341	21.7595	21.6862	22.2219	22.0679	21.8515	22.0956	21.8308	22.3058				19	19	0	0.910313	0.0557661	0.253841	1.95013	0.846711	0.0717375	0.284173	1.82332	A7E2V4	ZSWM8_HUMAN	ZSWIM8	Zinc finger SWIM domain-containing protein 8
20.937	21.0544	20.8521	21.9971	22.0437	22.0416	21.9511	22.012	21.97	+	+	PE3_PE1;PE7_PE1	25	5	0	4.23473	0	1.07962	17.822	4.13203	0.000330199	1.02983	16.7878	A8CG34	P121C_HUMAN	POM121C	Nuclear envelope pore membrane protein POM 121C
21.1615	21.3313	21.3398	20.8139	20.7026	20.4184	20.9751	20.8322	20.6041	+	+	PE3_PE1;PE7_PE1	7	7	0	2.06884	0.00326034	-0.632565	-4.81822	1.74208	0.0084401	-0.473747	-3.8624	A8MPS7	YDJC_HUMAN	YDJC	Carbohydrate deacetylase
19.2724	19.2188	19.4827	18.0318	18.4635	18.4328	17.882	17.8198	18.4855	+	+	PE3_PE1;PE7_PE1	3	3	0	2.49324	0.00144273	-1.01521	-6.31723	2.29009	0.00321149	-1.26218	-5.55872	A8MT69	CENPX_HUMAN	CENPX	Centromere protein X
18.3572	19.4435	19.4241	17.807	17.6836	20.3655	20.2954	18.375	20.2575				3	3	3	0.184116	0.787712	-0.456227	-0.482814	0.319354	0.448924	0.56768	0.779286	A8MTT3	CEBOS_HUMAN	CEBPZOS	Protein CEBPZOS
19.7052	19.483	19.9401	19.0692	19.5193	19.4136	19.4163	19.4245	19.5016				12	12	0	0.926028	0.0534881	-0.375413	-1.98171	0.907338	0.0609512	-0.261955	-1.94417	A8MW92	P20L1_HUMAN	PHF20L1	PHD finger protein 20-like protein 1
25.6876	26.0223	25.9337	25.9451	25.9259	25.8729	25.7024	25.668	25.7224				3	0	0	0.119058	0.874912	0.0334689	0.326772	0.840453	0.0726669	-0.18358	-1.81092	A8MWD9;P62308	RUXGL_HUMAN;RUXG_HUMAN	SNRPG;SNRPGP15	Putative small nuclear ribonucleoprotein G-like protein 15
19.874	20.1504	20.1752	18.7553	18.6313	18.7926	18.692	18.6139	18.4189	+	+	PE3_PE1;PE7_PE1	10	9	0	3.61312	7.92332e-05	-1.34014	-12.3926	3.53348	0.000799484	-1.49159	-11.825	A8MXT2	MAGBH_HUMAN	MAGEB17	Melanoma-associated antigen B17
23.5756	23.7983	23.5363	24.0699	24.3045	24.1814	24.1503	24.0503	24.0733	+	+	PE3_PE1;PE7_PE1	10	10	0	2.17789	0.00249957	0.54855	5.17282	2.1936	0.0037178	0.454557	5.22552	A8MXV4	NUD19_HUMAN	NUDT19	Acyl-coenzyme A diphosphatase NUDT19
21.706	21.3425	21.6427	21.0678	20.9992	20.9863	21.1516	21.0266	21.1926	+	+	PE3_PE1;PE7_PE1	12	12	0	2.04714	0.00343668	-0.545987	-4.74994	1.63743	0.0106807	-0.440108	-3.58597	A9UHW6	MI4GD_HUMAN	MIF4GD	MIF4G domain-containing protein
16.0106	18.9214	17.0163	18.8073	19.0581	19.0643	18.9866	18.5072	19.1213				2	0	1	0.90324	0.0568501	1.6605	1.93596	0.825132	0.0760354	1.5556	1.78061	B4DXR9	ZN732_HUMAN	ZNF732	Zinc finger protein 732
20.2146	20.3864	20.0708	20.5167	20.2931	20.33	20.0624	20.4846	20.3172				6	6	0	0.611384	0.134645	0.156008	1.36257	0.157135	0.821771	0.0641511	0.419487	B7ZAP0	RBG10_HUMAN	RABGAP1L	Rab GTPase-activating protein 1-like
23.3465	23.4222	23.5906	23.7447	23.8246	23.7885	23.8709	23.8403	23.9386	+	+	PE3_PE1;PE7_PE1	8	0	0	1.9297	0.00464793	0.332822	4.39279	2.28205	0.00327627	0.430147	5.53033	B7ZAQ6;P0CG08	GPHRA_HUMAN;GPHRB_HUMAN	GPR89A;GPR89B	Golgi pH regulator A
21.6331	21.1369	21.3861	20.7334	20.7054	20.9102	20.9921	21.0642	21.3642	+		PE3_PE1	2	1	0	1.73284	0.00761159	-0.602348	-3.83747	0.599539	0.144751	-0.245188	-1.33948	B9A064	IGLL5_HUMAN	IGLL5	Immunoglobulin lambda-like polypeptide 5
19.8098	18.9853	19.5475	19.578	19.6259	19.2668	19.1651	19.4697	19.2507				3	3	1	0.0550037	0.948422	0.0427316	0.159451	0.230059	0.691078	-0.152357	-0.586954	C0HLS1	OSCRI_HUMAN	SCRIB	SCRIB overlapping open reading frame protein
17.4081	18.426	18.294	19.3818	18.7966	19.0748	19.0213	19.0311	18.7003	+	+	PE3_PE1;PE7_PE1	4	4	1	1.34736	0.0189875	1.0417	2.88161	1.21776	0.0275684	0.874848	2.59181	C0HMD6	APDD1_HUMAN	PIDD1
22.2389	22.1752	22.2682	22.0215	21.966	21.8827	22.1744	22.0837	21.9007	+		PE3_PE1	6	0	0	2.28736	0.00200417	-0.270696	-5.54907	0.960523	0.0523828	-0.174471	-2.0514	C4AMC7;Q6VEQ5	WASH2_HUMAN;WASH3_HUMAN	WASH2P;WASH3P	Putative WAS protein family homolog 3
20.0903	20.2246	20.2354	21.251	21.2528	21.2056	21.3868	21.3728	21.1661	+	+	PE3_PE1;PE7_PE1	23	1	0	4.55143	0	1.05306	21.4203	3.7202	0.000680089	1.12516	13.1971	C9J798	RAS4B_HUMAN	RASA4B	Ras GTPase-activating protein 4B
17.7158	17.8354	18.3253	18.7307	18.7857	18.6361	18.2834	18.0545	18.4235	+		PE3_PE1	2	2	0	1.77832	0.00681908	0.758641	3.96125	0.615284	0.137309	0.294932	1.37017	C9J7I0	UMAD1_HUMAN	UMAD1	UBAP1-MVB12-associated (UMA)-domain containing protein 1
22.2726	22.0687	22.0316	23.2223	23.3733	23.2146	23.1442	23.1719	23.1645	+	+	PE3_PE1;PE7_PE1	5	5	0	3.63968	8.09399e-05	1.14576	12.5877	3.789	0.000622925	1.03589	13.7402	C9JLW8	MCRI1_HUMAN	MCRIP1	Mapk-regulated corepressor-interacting protein 1
26.4673	26.6051	26.5697	26.413	26.4645	26.3676	26.3658	26.3813	26.3555	+	+	PE3_PE1;PE7_PE1	7	0	0	1.24485	0.0242129	-0.132326	-2.65129	1.89145	0.00619829	-0.179843	-4.2808	E9PAV3;Q13765	NACAM_HUMAN;NACA_HUMAN	NACA	Nascent polypeptide-associated complex subunit alpha
24.4965	24.545	24.578	24.2776	24.3284	24.3757	24.2579	24.355	24.4113	+	+	PE3_PE1;PE7_PE1	7	7	0	2.34549	0.00186455	-0.21261	-5.75768	1.76184	0.00813735	-0.198433	-3.91611	E9PRG8	CK098_HUMAN	C11orf98	Uncharacterized protein C11orf98
24.5142	24.5265	24.5228	24.6027	24.4753	24.4671	24.6184	24.6575	24.5366		+	PE7_PE1	6	6	0	0.0477413	0.955113	-0.00614103	-0.139363	1.08892	0.037476	0.0829665	2.31608	L0R6Q1	S35U4_HUMAN	SLC35A4	SLC35A4 upstream open reading frame protein
22.5169	22.1536	22.382	22.9289	22.7925	22.624	22.9289	23.0244	22.8284	+	+	PE3_PE1;PE7_PE1	10	10	0	1.45156	0.0151962	0.430953	3.12505	2.062	0.00457428	0.5764	4.79659	L0R819	ASURF_HUMAN	ASDURF	ASNSD1 upstream open reading frame protein
21.8002	21.886	21.8406	22.0521	21.9703	22.0176	21.8444	22.0687	21.9315	+		PE3_PE1	4	4	0	2.12148	0.00288748	0.171021	4.98696	0.690306	0.11015	0.105879	1.51631	L0R8F8	MIDUO_HUMAN	MIEF1	Mitochondrial ribosome and complex I assembly factor AltMIEF1
25.8598	25.8626	25.7873	26.3367	26.3923	26.3706	26.4428	26.5126	26.4439	+	+	PE3_PE1;PE7_PE1	6	6	0	4.24961	0	0.529946	17.9768	4.31249	0.000229665	0.62985	18.6461	O00115	DNS2A_HUMAN	DNASE2	Deoxyribonuclease-2-alpha
24.5657	24.6047	24.626	24.5383	24.5481	24.5511	24.5074	24.6608	24.5658	+		PE3_PE1	28	28	0	1.36969	0.0178504	-0.0530217	-2.93294	0.162955	0.813052	-0.0208295	-0.433301	O00116	ADAS_HUMAN	AGPS	Alkyldihydroxyacetonephosphate synthase
18.0182	18.1489	17.7047	16.2222	16.9762	16.1331	17.2709	16.4152	16.462	+	+	PE3_PE1;PE7_PE1	2	2	0	2.14883	0.00264536	-1.51344	-5.07641	1.80573	0.00750288	-1.24121	-4.03712	O00124	UBXN8_HUMAN	UBXN8	UBX domain-containing protein 8
24.3387	24.2847	24.293	24.2158	24.2379	24.2279	24.2809	24.2977	24.2457	+		PE3_PE1	28	26	0	1.91927	0.00479105	-0.0783056	-4.36204	0.60503	0.142075	-0.0306778	-1.35019	O00139	KIF2A_HUMAN	KIF2A	Kinesin-like protein KIF2A
21.321	21.088	21.2661	20.6956	20.9236	20.706	20.588	20.9502	20.6569	+	+	PE3_PE1;PE7_PE1	6	6	0	1.93121	0.00459233	-0.449962	-4.39723	1.7011	0.00951731	-0.49332	-3.7526	O00142	KITM_HUMAN	TK2	Thymidine kinase 2
27.1661	27.1294	27.1141	26.8799	26.9006	26.8932	26.9725	27.0186	26.9839	+	+	PE3_PE1;PE7_PE1	24	11	0	3.91718	0	-0.245318	-14.8102	2.65574	0.00189189	-0.144889	-6.98543	O00148	DX39A_HUMAN	DDX39A	ATP-dependent RNA helicase DDX39A
20.8731	20.517	20.7892	22.8578	22.8092	22.8109	22.7507	22.749	22.7709	+	+	PE3_PE1;PE7_PE1	14	14	0	4.37421	0	2.09953	19.3269	4.33163	0.000233293	2.03042	18.8548	O00151	PDLI1_HUMAN	PDLIM1	PDZ and LIM domain protein 1
24.6863	24.6121	24.6404	25.3086	25.4122	25.362	25.307	25.3594	25.3686	+	+	PE3_PE1;PE7_PE1	19	17	0	4.37787	0	0.714662	19.3681	4.76069	0.000176796	0.698727	24.1811	O00154	BACH_HUMAN	ACOT7	Cytosolic acyl coenzyme A thioester hydrolase
25.5357	25.4508	25.4405	26.0303	25.9728	25.9062	25.8555	25.9259	25.9463	+	+	PE3_PE1;PE7_PE1	42	41	0	3.33997	0.000183467	0.494083	10.5471	3.35139	0.000879417	0.433562	10.6187	O00159	MYO1C_HUMAN	MYO1C	Unconventional myosin-Ic
21.0005	21.4523	21.2985	22.6722	22.5398	22.682	22.818	22.5266	22.5435	+	+	PE3_PE1;PE7_PE1	28	25	0	3.22344	0.000325025	1.38089	9.84169	2.97275	0.00137329	1.37895	8.47026	O00160	MYO1F_HUMAN	MYO1F	Unconventional myosin-If
23.5008	23.5609	23.5826	23.3798	23.3033	23.3955	23.3041	23.3268	23.2511	+	+	PE3_PE1;PE7_PE1	11	11	0	2.13292	0.00271039	-0.188606	-5.0242	2.80635	0.0016051	-0.254116	-7.65899	O00161	SNP23_HUMAN	SNAP23	Synaptosomal-associated protein 23
22.5378	22.505	22.4854	23.4719	23.4916	23.4401	23.4979	23.4038	23.5428	+	+	PE3_PE1;PE7_PE1	14	14	0	5.82576	0	0.958485	44.7318	4.61611	0.00015311	0.972111	22.2385	O00165	HAX1_HUMAN	HAX1	HCLS1-associated protein X-1
24.0365	24.0587	24.0166	23.6919	23.7246	23.6863	23.6623	23.6497	23.7273	+	+	PE3_PE1;PE7_PE1	16	16	0	4.41278	0	-0.33632	-19.7647	3.73104	0.000687265	-0.357495	-13.2812	O00170	AIP_HUMAN	AIP	AH receptor-interacting protein
23.8394	23.9678	23.8141	23.9125	23.8863	23.9918	23.9777	24.0782	23.9379				18	18	0	0.420968	0.272479	0.0564537	0.987403	0.916472	0.0595954	0.124188	1.9625	O00178	GTPB1_HUMAN	GTPBP1	GTP-binding protein 1
21.8064	21.8966	21.8846	21.6094	21.738	21.6365	21.7142	21.6833	21.7111	+	+	PE3_PE1;PE7_PE1	23	23	0	1.85234	0.00566476	-0.20125	-4.1684	2.22595	0.00351948	-0.159681	-5.3354	O00186	STXB3_HUMAN	STXBP3	Syntaxin-binding protein 3
21.0546	21.0285	20.8576	21.0497	21.3459	21.2499	21.5255	21.5331	21.2306	+	+	PE3_PE1;PE7_PE1	11	11	0	1.03205	0.0407936	0.234931	2.19775	1.73228	0.00861876	0.449493	3.83597	O00189	AP4M1_HUMAN	AP4M1	AP-4 complex subunit mu-1
23.4858	23.6078	23.6686	23.97	24.0827	23.9849	23.8412	23.9356	24.0489	+	+	PE3_PE1;PE7_PE1	5	5	0	2.56588	0.00117583	0.425139	6.6088	1.9318	0.00585004	0.354497	4.39898	O00193	SMAP_HUMAN	SMAP	Small acidic protein
18.0118	17.6466	18.085	18.0301	18.6603	18.4531	18.3025	18.0926	18.3414	+	+	PE3_PE1;PE7_PE1	3	3	1	0.950583	0.0498205	0.466683	2.03126	0.994709	0.0476823	0.331036	2.12102	O00194	RB27B_HUMAN	RAB27B	Ras-related protein Rab-27B
23.913	23.8706	23.9221	23.7502	23.7281	23.6887	23.7315	23.8152	23.7617	+	+	PE3_PE1;PE7_PE1	49	38	0	2.76773	0.000875812	-0.179571	-7.48101	1.97852	0.00529219	-0.13243	-4.53876	O00203	AP3B1_HUMAN	AP3B1	AP-3 complex subunit beta-1
16.931	17.5603	17.3591	17.681	18.3222	18.3008	18.4368	18.0327	18.4182	+	+	PE3_PE1;PE7_PE1	5	5	0	1.36243	0.0180153	0.817857	2.9162	1.94869	0.00556904	1.01242	4.44915	O00212	RHOD_HUMAN	RHOD	Rho-related GTP-binding protein RhoD
22.1018	21.9354	22.018	20.9524	20.8215	21.137	21.168	21.1277	21.0058	+	+	PE3_PE1;PE7_PE1	10	10	0	3.27365	0.000334531	-1.04814	-10.14	3.74716	0.000698315	-0.917914	-13.4074	O00214	LEG8_HUMAN	LGALS8	Galectin-8
24.2975	24.3256	24.2163	23.8863	24.0089	23.959	24.0581	23.9953	23.9133	+	+	PE3_PE1;PE7_PE1	8	8	0	2.60869	0.00113724	-0.328389	-6.78595	2.26369	0.00335515	-0.290891	-5.46592	O00217	NDUS8_HUMAN	NDUFS8	NADH dehydrogenase [ubiquinone] iron-sulfur protein 8
20.0586	19.5057	20.1332	20.2652	20.4441	20.4782	20.3563	20.0243	20.4188	+		PE3_PE1	5	5	0	1.11944	0.0326501	0.496664	2.3804	0.722003	0.100003	0.367271	1.57816	O00220	TR10A_HUMAN	TNFRSF10A	Tumor necrosis factor receptor superfamily member 10A
22.3061	22.4758	22.2361	22.7061	22.7625	22.8978	22.5472	22.743	22.8666	+	+	PE3_PE1;PE7_PE1	8	8	0	2.10508	0.00299506	0.449463	4.93389	1.50045	0.013781	0.379618	3.24281	O00221	IKBE_HUMAN	NFKBIE	NF-kappa-B inhibitor epsilon
25.9883	25.9247	25.9584	25.6222	25.655	25.6663	25.6972	25.7381	25.6873	+	+	PE3_PE1;PE7_PE1	29	29	0	3.77911	9.01163e-05	-0.309294	-13.6608	3.31138	0.000854031	-0.249612	-10.3697	O00231	PSD11_HUMAN	PSMD11	26S proteasome non-ATPase regulatory subunit 11
25.1654	25.2246	25.24	25.0385	25.0907	25.0961	24.9358	25.0311	25.0556	+	+	PE3_PE1;PE7_PE1	26	26	0	2.00329	0.00382595	-0.134893	-4.61416	2.03232	0.00480548	-0.202488	-4.7037	O00232	PSD12_HUMAN	PSMD12	26S proteasome non-ATPase regulatory subunit 12
23.8707	23.9236	23.7992	23.6337	23.6454	23.6152	23.4956	23.6029	23.6105	+	+	PE3_PE1;PE7_PE1	13	13	0	2.48379	0.00143473	-0.23306	-6.28013	2.32946	0.00313087	-0.294807	-5.69951	O00233	PSMD9_HUMAN	PSMD9	26S proteasome non-ATPase regulatory subunit 9
24.7125	24.8361	24.7813	24.8992	24.9497	24.954	24.8434	24.9006	24.9036	+	+	PE3_PE1;PE7_PE1	5	5	0	1.77657	0.00681578	0.157699	3.95645	1.2202	0.0274795	0.105895	2.59715	O00244	ATOX1_HUMAN	ATOX1	Copper transport protein ATOX1
21.4339	21.5059	21.4872	21.1867	21.1204	21.0819	21.0263	21.2906	21.1568	+	+	PE3_PE1;PE7_PE1	15	15	0	3.117	0.000346208	-0.345978	-9.2361	1.79499	0.00762366	-0.317782	-4.00726	O00255	MEN1_HUMAN	MEN1	Menin
20.4069	20.3682	20.3952	20.2476	20.0945	20.1207	20.091	20.418	20.3365	+		PE3_PE1	16	16	0	2.07843	0.00323887	-0.235843	-4.84861	0.474631	0.223012	-0.108285	-1.09442	O00257	CBX4_HUMAN	CBX4	E3 SUMO-protein ligase CBX4
21.8584	21.7983	21.8563	22.4511	22.6128	22.5338	22.4239	22.6087	22.4243	+	+	PE3_PE1;PE7_PE1	5	5	0	3.78628	9.0379e-05	0.694891	13.7183	3.25567	0.000949868	0.647947	10.0322	O00258	GET1_HUMAN	GET1	Guided entry of tail-anchored proteins factor 1
23.774	23.6091	23.617	23.8415	23.8279	23.8119	24.1416	24.0838	24.0596	+	+	PE3_PE1;PE7_PE1	8	8	0	1.37669	0.0176517	0.1604	2.94913	2.71978	0.00174515	0.428307	7.26514	O00264	PGRC1_HUMAN	PGRMC1	Membrane-associated progesterone receptor component 1
23.6894	23.6685	23.6949	23.5704	23.5608	23.5986	23.5973	23.6146	23.6332	+	+	PE3_PE1;PE7_PE1	46	46	0	2.82375	0.000777953	-0.107635	-7.74042	2.21076	0.00361972	-0.0692285	-5.28359	O00267	SPT5H_HUMAN	SUPT5H	Transcription elongation factor SPT5
20.737	20.6016	20.4896	20.8336	20.9557	20.9325	20.767	20.8425	20.7636	+	+	PE3_PE1;PE7_PE1	22	21	0	1.67752	0.00886932	0.297862	3.69034	1.12418	0.0349275	0.181672	2.39044	O00268	TAF4_HUMAN	TAF4	Transcription initiation factor TFIID subunit 4
24.0809	24.089	24.0841	24.0524	24.0433	24.0433	24.0783	24.047	24.1229	+		PE3_PE1	16	16	0	3.24627	0.000329459	-0.0383339	-9.97631	0.0289896	0.971721	-0.00191053	-0.0862291	O00273	DFFA_HUMAN	DFFA	DNA fragmentation factor subunit alpha
21.2985	20.6434	21.0595	21.0018	21.1476	21.331	20.8827	21.1592	21.0985				5	5	0	0.304014	0.488085	0.159686	0.747007	0.0781645	0.919847	0.04636	0.221864	O00287	RFXAP_HUMAN	RFXAP	Regulatory factor X-associated protein
17.3182	17.6493	17.0022	19.5237	19.3599	19.3974	19.3587	19.7005	19.8067	+	+	PE3_PE1;PE7_PE1	11	4	1	3.39324	0.000190371	2.10375	10.8852	3.24502	0.00100784	2.29871	9.9689	O00292	LFTY2_HUMAN	LEFTY2	Left-right determination factor 2
27.9624	27.9295	27.9003	27.6111	27.6543	27.6154	27.5862	27.7017	27.6751	+	+	PE3_PE1;PE7_PE1	16	16	0	3.75305	8.76945e-05	-0.303804	-13.4537	2.66895	0.00181993	-0.276358	-7.04233	O00299	CLIC1_HUMAN	CLIC1	Chloride intracellular channel protein 1
25.2643	25.0927	25.1665	24.9756	25.0132	24.9401	24.8737	25.0471	24.9579	+	+	PE3_PE1;PE7_PE1	13	13	0	1.6701	0.00905472	-0.198217	-3.67088	1.41859	0.0169116	-0.214965	-3.04693	O00303	EIF3F_HUMAN	EIF3F	Eukaryotic translation initiation factor 3 subunit F
20.7867	20.6381	20.6118	19.7466	19.5371	19.4182	19.5531	19.7526	19.6474	+	+	PE3_PE1;PE7_PE1	15	13	0	3.26221	0.000332823	-1.11155	-10.0713	3.68974	0.000665693	-1.02782	-12.9633	O00308	WWP2_HUMAN	WWP2	NEDD4-like E3 ubiquitin-protein ligase WWP2
18.9874	19.1182	17.9264	18.6863	18.1353	18.7256	18.4469	19.2315	19.6901				3	3	0	0.141589	0.848431	-0.161556	-0.382144	0.35382	0.375714	0.445515	0.850885	O00311	CDC7_HUMAN	CDC7	Cell division cycle 7-related protein kinase
23.107	23.0337	23.0641	23.6236	23.5902	23.5407	23.7078	23.7682	23.6874	+	+	PE3_PE1;PE7_PE1	23	23	0	4.05818	0	0.516568	16.0807	4.45429	0.000259811	0.652854	20.2466	O00330	ODPX_HUMAN	PDHX	Pyruvate dehydrogenase protein X component
21.6615	21.3711	21.5195	22.2123	22.0715	22.2159	22.3682	22.2713	22.24	+	+	PE3_PE1;PE7_PE1	27	27	0	2.59658	0.00116156	0.64915	6.73543	2.96002	0.00136189	0.775788	8.40556	O00391	QSOX1_HUMAN	QSOX1	Sulfhydryl oxidase 1
21.9957	21.8165	21.897	22.01	22.0564	22.0217	22.1027	21.9331	22.0488	+		PE3_PE1	4	4	0	1.10704	0.0338342	0.126309	2.35421	0.803283	0.0803062	0.125134	1.73751	O00399	DCTN6_HUMAN	DCTN6	Dynactin subunit 6
22.4932	22.5011	22.5516	22.8743	22.7834	22.8454	22.8622	22.8382	22.8502	+	+	PE3_PE1;PE7_PE1	14	14	0	3.22124	0.000324863	0.319064	9.8288	4.16522	0.000336528	0.334861	17.1154	O00400	ACATN_HUMAN	SLC33A1	Acetyl-coenzyme A transporter 1
19.3696	19.3098	19.5894	19.8551	19.7472	19.9107	19.5371	19.359	19.7759	+		PE3_PE1	5	5	0	1.88056	0.00538925	0.414732	4.24928	0.382694	0.327885	0.134398	0.910014	O00401	WASL_HUMAN	WASL	Actin nucleation-promoting factor WASL
23.8604	23.8656	23.7991	24.014	23.974	23.9721	23.8958	24.0189	24.0058	+	+	PE3_PE1;PE7_PE1	44	42	0	2.33665	0.00192049	0.144993	5.72555	1.38261	0.0182877	0.131799	2.96286	O00410	IPO5_HUMAN	IPO5	Importin-5
22.4809	22.444	22.4858	23.5432	23.5283	23.4856	23.6362	23.5832	23.5964	+	+	PE3_PE1;PE7_PE1	47	47	0	5.96035	0	1.04877	48.3411	6.18155	0.00107865	1.13502	54.9142	O00411	RPOM_HUMAN	POLRMT	DNA-directed RNA polymerase
20.6127	20.4865	20.4447	20.0957	19.9493	20.3206	20.1184	20.1122	19.8971	+	+	PE3_PE1;PE7_PE1	20	20	0	1.5217	0.0129936	-0.392785	-3.29474	2.22454	0.00351738	-0.472067	-5.33057	O00418	EF2K_HUMAN	EEF2K	Eukaryotic elongation factor 2 kinase
24.6401	24.6386	24.6561	24.3164	24.4445	24.4053	24.3683	24.4228	24.3392	+	+	PE3_PE1;PE7_PE1	10	10	0	2.58534	0.00115472	-0.256225	-6.6888	3.35883	0.000881394	-0.268147	-10.6656	O00422	SAP18_HUMAN	SAP18	Histone deacetylase complex subunit SAP18
21.9626	21.8412	21.8627	24.458	24.4685	24.4222	24.5011	24.4747	24.4884	+	+	PE3_PE1;PE7_PE1	29	27	0	6.45059	0	2.56074	64.1225	6.55513	0.00195918	2.59925	68.1029	O00425	IF2B3_HUMAN	IGF2BP3	Insulin-like growth factor 2 mRNA-binding protein 3
24.3351	24.2872	24.3289	24.3171	24.3241	24.2882	24.3194	24.3802	24.3548				48	48	0	0.145399	0.842721	-0.00729561	-0.391357	0.672806	0.115369	0.0343653	1.48221	O00429	DNM1L_HUMAN	DNM1L	Dynamin-1-like protein
22.8782	22.7552	22.6341	22.9859	23.0275	23.0273	22.9909	23.0244	22.946	+	+	PE3_PE1;PE7_PE1	12	12	0	1.63886	0.00956129	0.257704	3.58965	1.45137	0.0156508	0.231263	3.12458	O00442	RTCA_HUMAN	RTCA	RNA 3'-terminal phosphate cyclase
21.2272	21.2966	21.0865	21.0859	20.954	21.1113	20.9705	21.1642	21.2444				41	41	0	0.907373	0.0564035	-0.153042	-1.94424	0.307644	0.477108	-0.0770524	-0.754671	O00443	P3C2A_HUMAN	PIK3C2A	Phosphatidylinositol 4-phosphate 3-kinase C2 domain-containing subunit alpha
17.9493	17.8009	17.5378	18.6157	18.4368	18.2596	18.4309	18.5975	18.2421	+	+	PE3_PE1;PE7_PE1	13	13	0	1.88534	0.0053783	0.674661	4.2631	1.85567	0.00668842	0.660802	4.17787	O00459	P85B_HUMAN	PIK3R2	Phosphatidylinositol 3-kinase regulatory subunit beta
24.5265	24.4058	24.4554	25.3464	25.3529	25.3488	25.4223	25.4926	25.4689	+	+	PE3_PE1;PE7_PE1	26	26	0	4.83843	0	0.886829	25.2939	4.78831	0.000183556	0.998738	24.5709	O00461	GOLI4_HUMAN	GOLIM4	Golgi integral membrane protein 4
23.4093	23.2647	23.2532	23.369	23.4264	23.4221	23.4811	23.4675	23.4425		+	PE7_PE1	24	24	0	0.838979	0.0676829	0.0967477	1.808	1.39975	0.0173776	0.154605	3.00276	O00462	MANBA_HUMAN	MANBA	Beta-mannosidase
22.0299	22.0139	21.8699	21.7448	21.7275	21.7958	21.7234	21.7679	21.7473	+	+	PE3_PE1;PE7_PE1	26	26	0	1.76465	0.00686196	-0.215218	-3.92377	1.89376	0.0062015	-0.225025	-4.2875	O00471	EXOC5_HUMAN	EXOC5	Exocyst complex component 5
22.7569	22.9383	22.7607	22.4675	22.5084	22.7004	22.6307	22.6861	22.592	+	+	PE3_PE1;PE7_PE1	17	17	0	1.3026	0.0210247	-0.259871	-2.77997	1.29905	0.0230235	-0.182398	-2.77198	O00472	ELL2_HUMAN	ELL2	RNA polymerase II elongation factor ELL2
23.7367	23.7925	23.7778	23.9269	23.8372	23.8932	23.7844	23.7884	23.8115	+		PE3_PE1	17	9	0	1.70566	0.00822978	0.116772	3.76471	0.619242	0.135786	0.0257632	1.37788	O00478	BT3A3_HUMAN	BTN3A3	Butyrophilin subfamily 3 member A3
24.6354	24.5399	24.4915	23.6424	23.5857	23.557	23.9506	23.9375	24.1205	+	+	PE3_PE1;PE7_PE1	4	3	0	4.39224	0	-0.960552	-19.5304	2.79789	0.00159873	-0.552713	-7.61971	O00479	HMGN4_HUMAN	HMGN4	High mobility group nucleosome-binding domain-containing protein 4
20.3859	20.1943	20.1116	20.2367	19.906	19.8997	20.0296	20.054	20.2992				9	9	0	0.718186	0.0966304	-0.216455	-1.5707	0.363059	0.359492	-0.102972	-0.869882	O00481	BT3A1_HUMAN	BTN3A1	Butyrophilin subfamily 3 member A1
25.6369	25.6532	25.6484	25.1963	25.1778	25.0828	25.096	25.1797	25.1481	+	+	PE3_PE1;PE7_PE1	4	4	0	3.81132	9.19199e-05	-0.493857	-13.921	4.45855	0.000261224	-0.504864	-20.2968	O00483	NDUA4_HUMAN	NDUFA4	Cytochrome c oxidase subunit NDUFA4
25.6609	25.6662	25.6919	25.4068	25.3449	25.432	25.2716	25.27	25.3196	+	+	PE3_PE1;PE7_PE1	15	15	0	3.26494	0.000332993	-0.278419	-10.0876	4.47307	0.000132231	-0.38595	-20.4685	O00487	PSDE_HUMAN	PSMD14	26S proteasome non-ATPase regulatory subunit 14
20.8426	20.6235	20.712	21.0059	20.9997	21.0044	21.1891	21.1701	20.9811	+	+	PE3_PE1;PE7_PE1	6	6	0	1.91667	0.00485141	0.277296	4.3544	1.86731	0.00658299	0.387377	4.21117	O00488	ZN593_HUMAN	ZNF593	Zinc finger protein 593
23.046	22.9348	23.0164	23.2815	23.407	23.3444	23.2726	23.4149	23.351	+	+	PE3_PE1;PE7_PE1	8	8	0	2.66396	0.000966365	0.345214	7.02078	2.55434	0.00219979	0.347059	6.5617	O00505	IMA4_HUMAN	KPNA3	Importin subunit alpha-4
18.3433	17.9748	17.8931	18.9959	18.8615	19.0269	18.5062	18.9369	19.0577	+	+	PE3_PE1;PE7_PE1	6	6	0	2.42168	0.00155584	0.891015	6.04082	1.60911	0.0112317	0.763192	3.51334	O00506	STK25_HUMAN	STK25	Serine/threonine-protein kinase 25
20.8426	20.8714	20.958	19.9605	20.109	20.1659	20.4126	20.3359	20.2851	+	+	PE3_PE1;PE7_PE1	18	18	0	3.49231	0.000146659	-0.812222	-11.5414	3.37404	0.000893957	-0.546111	-10.7621	O00512	BCL9_HUMAN	BCL9	B-cell CLL/lymphoma 9 protein
21.0893	20.9589	21.064	21.3209	21.2289	21.3197	21.2683	21.1927	21.2857	+	+	PE3_PE1;PE7_PE1	24	24	0	2.13356	0.00268595	0.252453	5.02631	1.90111	0.00612773	0.211512	4.30887	O00522	KRIT1_HUMAN	KRIT1	Krev interaction trapped protein 1
19.4351	19.8105	19.8851	21.5479	21.6182	21.5683	21.6554	21.6038	21.5887	+	+	PE3_PE1;PE7_PE1	24	24	0	3.72913	8.59917e-05	1.86789	13.2664	3.76459	0.000612753	1.90572	13.5451	O00534	VMA5A_HUMAN	VWA5A	von Willebrand factor A domain-containing protein 5A
23.9557	23.8605	23.9259	24.005	23.9688	24.0399	24.0838	24.1106	24.0247	+	+	PE3_PE1;PE7_PE1	28	28	0	1.22188	0.0254449	0.090566	2.60083	1.86189	0.00659811	0.159018	4.19564	O00541	PESC_HUMAN	PES1	Pescadillo homolog
22.3867	22.1431	22.1829	21.6632	21.2965	21.5853	21.5091	21.6403	21.5698	+	+	PE3_PE1;PE7_PE1	4	4	0	2.23462	0.00229554	-0.722569	-5.36517	2.85097	0.00151471	-0.664514	-7.86937	O00559	RCAS1_HUMAN	EBAG9	Receptor-binding cancer antigen expressed on SiSo cells
21.8715	21.5832	21.4513	19.293	19.0868	19.4985	18.9371	19.291	19.5212	+	+	PE3_PE1;PE7_PE1	3	3	0	3.77573	8.99202e-05	-2.34257	-13.6337	3.46242	0.00083313	-2.38556	-11.3395	O00560	SDCB1_HUMAN	SDCBP	Syntenin-1
20.2942	19.8032	20.3262	18.876	18.6823	18.5477	19.3503	19.1177	19.2483	+	+	PE3_PE1;PE7_PE1	11	11	0	2.75212	0.000913208	-1.43923	-7.41014	2.11152	0.00425078	-0.902473	-4.95467	O00562	PITM1_HUMAN	PITPNM1	Membrane-associated phosphatidylinositol transfer protein 1
22.3459	22.377	22.3978	22.5413	22.6025	22.4119	22.5497	22.6093	22.6223	+	+	PE3_PE1;PE7_PE1	21	21	0	1.17227	0.0285468	0.145018	2.49316	2.91115	0.00131978	0.220198	8.16128	O00566	MPP10_HUMAN	MPHOSPH10	U3 small nucleolar ribonucleoprotein protein MPP10
25.8653	25.8701	25.8564	25.7357	25.762	25.7556	25.8142	25.8185	25.7892	+	+	PE3_PE1;PE7_PE1	32	32	0	3.65643	8.22281e-05	-0.112828	-12.7121	2.32466	0.00315463	-0.0566298	-5.68221	O00567	NOP56_HUMAN	NOP56	Nucleolar protein 56
25.4743	25.4206	25.416	25.0583	25.0774	25.041	25.0844	25.0938	25.0964	+	+	PE3_PE1;PE7_PE1	44	14	0	4.21464	0	-0.378057	-17.6149	4.26231	0.000219429	-0.345404	-18.1102	O00571	DDX3X_HUMAN	DDX3X	ATP-dependent RNA helicase DDX3X
21.8698	21.8318	21.8699	21.9579	22.0715	21.9771	22.2561	22.1951	22.1401	+	+	PE3_PE1;PE7_PE1	9	9	0	1.75048	0.00717836	0.144988	3.88517	3.16237	0.001082	0.339954	9.48985	O00584	RNT2_HUMAN	RNASET2	Ribonuclease T2
16.494	16.3442	16.772	16.8311	17.3377	17.1527	16.4429	17.4998	17.2489	+		PE3_PE1	4	3	1	1.37316	0.0178291	0.570422	2.94095	0.701829	0.106225	0.527145	1.53878	O00587	MFNG_HUMAN	MFNG	Beta-1
22.4105	22.3005	22.5274	23.6925	23.7385	23.7504	23.651	23.6677	23.6925	+	+	PE3_PE1;PE7_PE1	11	11	0	4.37867	0	1.31432	19.377	4.33455	0.000233861	1.25758	18.8867	O00592	PODXL_HUMAN	PODXL	Podocalyxin
21.1523	20.9564	20.7457	20.7232	20.8616	20.8272	21.1235	20.9648	20.9671				8	8	0	0.519906	0.184233	-0.147444	-1.18373	0.200832	0.750986	0.0670319	0.521203	O00623	PEX12_HUMAN	PEX12	Peroxisome assembly protein 12
22.2452	22.1401	22.2803	22.6948	22.8583	22.7403	22.6577	22.6965	22.6239	+	+	PE3_PE1;PE7_PE1	15	15	0	2.9636	0.000502964	0.542653	8.42371	3.12797	0.00116022	0.437552	9.29683	O00625	PIR_HUMAN	PIR	Pirin
24.2794	24.2109	24.2217	24.368	24.3409	24.3512	24.3003	24.2538	24.2637	+		PE3_PE1	15	9	0	2.16034	0.00260158	0.116029	5.11441	0.621224	0.135099	0.0352936	1.38174	O00629	IMA3_HUMAN	KPNA4	Importin subunit alpha-3
20.1525	20.3198	20.432	20.2341	20.2912	20.122	20.1635	20.1262	20.0354		+	PE7_PE1	16	16	0	0.377382	0.33171	-0.0856183	-0.899187	1.01006	0.0459465	-0.193034	-2.15247	O00635	TRI38_HUMAN	TRIM38	E3 ubiquitin-protein ligase TRIM38
17.7492	17.2599	16.8152	17.3895	16.3329	17.2559	17.4148	17.6833	17.5059				4	4	2	0.262891	0.610007	-0.281994	-0.65901	0.389999	0.316118	0.259895	0.924866	O00716	E2F3_HUMAN	E2F3	Transcription factor E2F3
23.7849	23.6531	23.7261	23.5866	23.6056	23.4723	23.5824	23.6519	23.5533	+	+	PE3_PE1;PE7_PE1	12	12	0	1.37712	0.0176141	-0.166545	-2.95013	1.22721	0.0271093	-0.125544	-2.61251	O00743	PPP6_HUMAN	PPP6C	Serine/threonine-protein phosphatase 6 catalytic subunit
20.1128	20.3062	20.2656	20.1275	20.2254	20.1977	20.0636	20.0573	20.2099				15	15	0	0.272638	0.581022	-0.0446606	-0.680077	0.696969	0.107898	-0.117958	-1.5293	O00750	P3C2B_HUMAN	PIK3C2B	Phosphatidylinositol 4-phosphate 3-kinase C2 domain-containing subunit beta
23.45	23.3359	23.3633	23.343	23.287	23.2952	23.3107	23.3606	23.355				30	30	0	0.903489	0.0568475	-0.0746657	-1.93645	0.468615	0.227986	-0.040954	-1.0825	O00754	MA2B1_HUMAN	MAN2B1	Lysosomal alpha-mannosidase
19.9377	19.5091	19.8357	22.0055	22.0159	21.9819	21.707	21.6195	21.6313	+	+	PE3_PE1;PE7_PE1	7	0	0	4.18165	0	2.24028	17.2799	3.85934	0.000365752	1.89177	14.3177	O00762;cRAP-O00762	UBE2C_HUMAN;cRAP-UBE2C_HUMAN	UBE2C;cRAP-UBE2C	Ubiquitin-conjugating enzyme E2 C
17.0167	16.8945	17.2691	16.5816	16.6008	15.8562	16.8799	16.9979	16.7922	+		PE3_PE1	13	13	0	1.24713	0.0241256	-0.713874	-2.65632	0.608367	0.140597	-0.170094	-1.35669	O00763	ACACB_HUMAN	ACACB	Acetyl-CoA carboxylase 2
24.0573	23.9421	24.0894	24.6244	24.6187	24.6497	24.5325	24.7048	24.6462	+	+	PE3_PE1;PE7_PE1	14	14	0	3.7143	8.53407e-05	0.601346	13.1514	3.04783	0.00119328	0.598221	8.86127	O00764	PDXK_HUMAN	PDXK	Pyridoxal kinase
21.7586	21.4903	21.7266	22.921	22.7643	22.7928	22.7766	22.7449	22.9302	+	+	PE3_PE1;PE7_PE1	3	3	0	3.55776	0.000153086	1.16755	11.9953	3.46355	0.000833638	1.15876	11.3471	O00767	SCD_HUMAN	SCD	Stearoyl-CoA desaturase
21.6642	21.7353	21.7897	23.0858	23.1127	23.0576	23.1426	23.1428	23.11	+	+	PE3_PE1;PE7_PE1	21	20	0	5.35901	0	1.35563	34.1722	5.49431	0.000436364	1.40206	36.9475	O14492	SH2B2_HUMAN	SH2B2	SH2B adapter protein 2
19.192	19.3426	19.466	20.0173	20.1828	20.037	19.8716	19.7973	19.6762	+	+	PE3_PE1;PE7_PE1	3	3	0	2.84851	0.000699602	0.745449	7.85762	1.99645	0.00513095	0.448126	4.59326	O14494	PLPP1_HUMAN	PLPP1	Phospholipid phosphatase 1
22.607	22.4983	22.4708	22.4745	22.3599	22.3736	22.3868	22.3027	22.4176	+	+	PE3_PE1;PE7_PE1	46	45	0	1.04618	0.0394668	-0.1227	-2.22698	1.35505	0.0196932	-0.156305	-2.89923	O14497	ARI1A_HUMAN	ARID1A	AT-rich interactive domain-containing protein 1A
22.6226	22.7616	22.6345	22.3657	22.3384	22.196	22.3174	22.3026	22.4272	+	+	PE3_PE1;PE7_PE1	2	0	0	2.24802	0.00217926	-0.372854	-5.41142	2.26108	0.00335109	-0.323835	-5.45681	O14519;O75956	CDKA1_HUMAN;CDKA2_HUMAN	CDK2AP1;CDK2AP2	Cyclin-dependent kinase 2-associated protein 1
24.5706	24.6132	24.6725	24.6273	24.748	24.6916	24.741	24.6438	24.7037				2	2	0	0.69968	0.102149	0.070179	1.53459	0.880381	0.0655617	0.077371	1.89027	O14521	DHSD_HUMAN	SDHD	Succinate dehydrogenase [ubiquinone] cytochrome b small subunit
21.5101	21.4209	21.5622	22.6973	22.6963	22.6751	22.8045	22.6966	22.8544	+	+	PE3_PE1;PE7_PE1	25	25	0	5.04213	0	1.19181	28.4563	4.49202	0.00013617	1.28742	20.6948	O14523	C2C2L_HUMAN	C2CD2L	Phospholipid transfer protein C2CD2L
21.8329	21.8584	21.718	21.7375	21.6536	21.7302	21.7572	21.8801	21.8588				8	8	0	0.879465	0.0608971	-0.0960051	-1.88844	0.193097	0.764544	0.0289427	0.503517	O14524	NEMP1_HUMAN	NEMP1	Nuclear envelope integral membrane protein 1
20.6294	20.5822	20.6107	21.0589	21.1399	21.0095	21.1757	21.0693	21.0213	+	+	PE3_PE1;PE7_PE1	21	21	0	3.47592	0.000144354	0.461998	11.4303	3.2677	0.000957447	0.481339	10.1043	O14526	FCHO1_HUMAN	FCHO1	F-BAR domain only protein 1
22.4331	22.5537	22.6777	22.3576	22.3887	22.4195	22.3433	22.3371	22.3281	+	+	PE3_PE1;PE7_PE1	9	9	0	1.07229	0.0370439	-0.166211	-2.28129	1.4367	0.0162386	-0.218651	-3.08971	O14530	TXND9_HUMAN	TXNDC9	Thioredoxin domain-containing protein 9
21.9058	21.8863	21.9341	22.046	22.1423	22.103	22.0944	22.2467	22.2044	+	+	PE3_PE1;PE7_PE1	21	21	0	2.42082	0.00155485	0.188381	6.03756	2.34473	0.0031544	0.273135	5.75489	O14545	TRAD1_HUMAN	TRAFD1	TRAF-type zinc finger domain-containing protein 1
22.75	22.6604	22.711	22.6403	22.7839	22.6673	22.6178	22.7099	22.6025				5	5	0	0.067903	0.934429	-0.00994746	-0.194508	0.683272	0.112487	-0.0637163	-1.5026	O14548	COX7R_HUMAN	COX7A2L	Cytochrome c oxidase subunit 7A-related protein
21.402	21.5587	21.359	21.792	21.6285	21.8693	21.5046	21.5929	21.6916	+		PE3_PE1	3	3	0	1.5893	0.0107701	0.323355	3.46309	0.898264	0.0626587	0.156477	1.92599	O14561	ACPM_HUMAN	NDUFAB1	Acyl carrier protein
23.4968	23.6386	23.4839	23.4747	23.4611	23.6343	23.4097	23.4662	23.3786		+	PE7_PE1	8	8	0	0.0774435	0.926012	-0.0163778	-0.219957	1.02316	0.0446667	-0.121571	-2.17941	O14562	UBFD1_HUMAN	UBFD1	Ubiquitin domain-containing protein UBFD1
20.9257	20.7407	20.9091	21.1028	21.136	20.9305	20.8402	20.9255	21.397	+		PE3_PE1	26	26	0	1.07085	0.0371181	0.197968	2.27827	0.462214	0.233785	0.195723	1.06979	O14578	CTRO_HUMAN	CIT	Citron Rho-interacting kinase
24.8786	24.9462	24.8819	25.1045	25.0862	25.0083	24.8884	24.9068	24.88	+		PE3_PE1	14	14	0	1.95295	0.00420155	0.164172	4.46188	0.169142	0.80376	-0.0104707	-0.447889	O14579	COPE_HUMAN	COPE	Coatomer subunit epsilon
19.9387	20.5388	20.3337	20.6786	20.5055	20.638	20.635	20.6799	20.7747		+	PE7_PE1	6	6	0	0.852386	0.0651804	0.336988	1.83457	1.10811	0.0360148	0.426146	2.35646	O14593	RFXK_HUMAN	RFXANK	DNA-binding protein RFXANK
23.8567	23.8889	23.9441	23.7981	23.853	23.7938	23.7808	23.7211	23.7462	+	+	PE3_PE1;PE7_PE1	44	44	0	1.20513	0.0265435	-0.0816085	-2.56428	2.05548	0.004625	-0.147232	-4.77609	O14617	AP3D1_HUMAN	AP3D1	AP-3 complex subunit delta-1
23.0371	22.9629	23.0454	22.9856	22.9266	22.99	22.9275	22.9404	23.0269				8	8	0	0.649163	0.118486	-0.0477403	-1.43616	0.544763	0.174127	-0.0502307	-1.23248	O14618	CCS_HUMAN	CCS	Copper chaperone for superoxide dismutase
22.8262	22.9299	22.922	23.0524	22.9393	23.0483	22.9097	22.9592	22.9558	+		PE3_PE1	47	36	0	1.13906	0.0312736	0.120685	2.42206	0.590821	0.149073	0.0488758	1.32248	O14646	CHD1_HUMAN	CHD1	Chromodomain-helicase-DNA-binding protein 1
21.5642	21.4314	21.3825	21.2497	21.2227	21.1631	21.2495	21.2339	21.2225	+	+	PE3_PE1;PE7_PE1	29	29	0	1.8371	0.00586957	-0.247532	-4.12514	1.82326	0.00727135	-0.224097	-4.08614	O14647	CHD2_HUMAN	CHD2	Chromodomain-helicase-DNA-binding protein 2
24.0238	23.9821	23.9763	23.8231	23.826	23.7847	23.9745	23.9888	23.8416	+		PE3_PE1	7	7	0	3.09738	0.000342699	-0.182837	-9.12829	0.529178	0.183587	-0.0591437	-1.20193	O14653	GOSR2_HUMAN	GOSR2	Golgi SNAP receptor complex member 2
22.7277	22.7708	22.7632	22.5608	22.5839	22.4046	22.4096	22.6017	22.4165	+	+	PE3_PE1;PE7_PE1	14	14	0	1.82909	0.00596602	-0.237435	-4.10255	1.90629	0.00606291	-0.277966	-4.324	O14656	TOR1A_HUMAN	TOR1A	Torsin-1A
23.3659	23.3973	23.3672	23.2118	23.3005	23.3258	23.3193	23.2666	23.2723	+	+	PE3_PE1;PE7_PE1	10	10	0	1.26762	0.0228669	-0.097414	-2.70172	2.0071	0.00503068	-0.0907326	-4.62586	O14657	TOR1B_HUMAN	TOR1B	Torsin-1B
21.0597	21.127	21.1096	21.7018	21.658	21.7494	21.679	21.8012	21.7573	+	+	PE3_PE1;PE7_PE1	10	10	0	4.27097	0	0.604252	18.2016	4.02473	0.000419048	0.64701	15.77	O14662	STX16_HUMAN	STX16	Syntaxin-16
22.255	22.1526	22.1297	22.4309	22.5448	22.4701	22.5369	22.5245	22.6169	+	+	PE3_PE1;PE7_PE1	27	27	0	2.39493	0.00160401	0.302889	5.94011	2.85594	0.00142342	0.380383	7.89309	O14672	ADA10_HUMAN	ADAM10	Disintegrin and metalloproteinase domain-containing protein 10
21.5659	21.5822	21.6604	22.5825	22.5032	22.3275	22.5866	22.5793	22.387	+	+	PE3_PE1;PE7_PE1	6	6	0	3.37198	0.000187466	0.868214	10.7491	3.66551	0.000652827	0.914803	12.7801	O14681	EI24_HUMAN	EI24	Etoposide-induced protein 2.4 homolog
20.9635	21.2055	21.2511	21.202	20.8371	21.0952	20.9269	21.0928	20.988				40	40	0	0.272061	0.582541	-0.0952644	-0.678835	0.607046	0.141335	-0.13747	-1.35412	O14686	KMT2D_HUMAN	KMT2D	Histone-lysine N-methyltransferase 2D
20.7456	20.4516	20.8659	20.9883	20.9601	21.0366	21.1174	21.0478	20.9369	+	+	PE3_PE1;PE7_PE1	7	7	0	1.15555	0.0298655	0.30729	2.45729	1.21623	0.0276036	0.346338	2.58848	O14713	ITBP1_HUMAN	ITGB1BP1	Integrin beta-1-binding protein 1
20.1869	20.1902	20.2036	19.841	19.8564	20.0254	19.9798	20.0565	19.9272	+	+	PE3_PE1;PE7_PE1	16	16	0	2.07041	0.00326387	-0.285964	-4.82318	2.25343	0.00336943	-0.205735	-5.43018	O14727	APAF_HUMAN	APAF1	Apoptotic protease-activating factor 1
24.6641	24.7165	24.53	24.0633	23.8695	24.0568	23.9786	24.1822	24.1093	+	+	PE3_PE1;PE7_PE1	11	11	0	2.79099	0.0008	-0.640311	-7.58775	2.59193	0.00208924	-0.546847	-6.7161	O14730	RIOK3_HUMAN	RIOK3	Serine/threonine-protein kinase RIO3
19.5366	19.9212	20.2872	19.2509	18.9837	18.4473	18.8277	18.745	18.2379	+	+	PE3_PE1;PE7_PE1	4	4	0	1.47641	0.0143164	-1.02103	-3.1846	2.00171	0.00508351	-1.31148	-4.60933	O14732	IMPA2_HUMAN	IMPA2	Inositol monophosphatase 2
20.8995	20.763	20.6503	21.1712	21.1783	21.2344	21.2384	21.3872	21.3554	+	+	PE3_PE1;PE7_PE1	20	20	0	2.32096	0.00196806	0.423715	5.66887	2.54865	0.0021914	0.556093	6.5386	O14733	MP2K7_HUMAN	MAP2K7	Dual specificity mitogen-activated protein kinase kinase 7
22.047	22.0184	21.9412	22.2279	22.1895	22.1825	22.1971	22.3094	22.2286	+	+	PE3_PE1;PE7_PE1	13	13	0	2.33396	0.00191758	0.197779	5.71578	2.20915	0.00361652	0.242836	5.27812	O14734	ACOT8_HUMAN	ACOT8	Acyl-coenzyme A thioesterase 8
20.8993	21.0652	20.8608	21.8353	21.9952	21.9789	21.53	21.5897	21.8438	+	+	PE3_PE1;PE7_PE1	5	5	0	3.60385	7.87302e-05	0.994695	12.3252	2.4649	0.00250863	0.712762	6.20651	O14735	CDIPT_HUMAN	CDIPT	CDP-diacylglycerol--inositol 3-phosphatidyltransferase
25.0285	25.123	25.0894	25.4595	25.3802	25.45	25.3515	25.3936	25.3558	+	+	PE3_PE1;PE7_PE1	9	9	0	3.14237	0.000308566	0.349651	9.37717	3.13363	0.00116364	0.28668	9.32838	O14737	PDCD5_HUMAN	PDCD5	Programmed cell death protein 5
23.1419	23.0877	23.0539	23.793	23.7819	23.7717	23.6781	23.8272	23.7174	+	+	PE3_PE1;PE7_PE1	27	27	0	4.89141	0	0.687689	26.0813	3.63682	0.000723969	0.646393	12.5665	O14744	ANM5_HUMAN	PRMT5	Protein arginine N-methyltransferase 5
25.886	25.7537	25.7622	26.278	26.3396	26.2658	26.2585	26.2419	26.2808	+	+	PE3_PE1;PE7_PE1	24	24	0	3.28211	0.000337649	0.49384	10.1911	3.31649	0.000859178	0.459785	10.4012	O14745	NHRF1_HUMAN	NHERF1	Na(+)/H(+) exchange regulatory cofactor NHE-RF1
21.4021	21.432	21.5564	21.515	21.6494	21.6304	21.8194	21.7294	21.6987	+	+	PE3_PE1;PE7_PE1	17	17	0	1.0004	0.0437816	0.134812	2.13267	2.06286	0.00457555	0.285707	4.79933	O14757	CHK1_HUMAN	CHEK1	Serine/threonine-protein kinase Chk1
19.6657	19.6992	19.4699	20.5901	20.483	20.3684	20.6114	20.4288	20.3318	+	+	PE3_PE1;PE7_PE1	12	12	0	3.0836	0.000397992	0.868895	9.0533	2.83134	0.00150304	0.845753	7.77616	O14772	FPGT_HUMAN	FPGT	Fucose-1-phosphate guanylyltransferase
25.5108	25.4936	25.4648	25.7147	25.7651	25.7184	25.8575	25.8756	25.8293	+	+	PE3_PE1;PE7_PE1	16	16	0	3.4918	0.000146572	0.243026	11.5379	4.36065	0.0002403	0.364424	19.1753	O14773	TPP1_HUMAN	TPP1	Tripeptidyl-peptidase 1
23.6347	23.6303	23.6145	23.3736	23.2952	23.33	23.3386	23.3886	23.405	+	+	PE3_PE1;PE7_PE1	42	41	0	3.62797	8.0207e-05	-0.293528	-12.5013	3.54677	0.000809399	-0.249072	-11.918	O14776	TCRG1_HUMAN	TCERG1	Transcription elongation regulator 1
22.7119	22.5605	22.6819	22.0657	22.1756	22.2509	22.4261	22.3334	22.2989	+	+	PE3_PE1;PE7_PE1	36	36	0	2.62831	0.00102586	-0.487369	-6.86852	2.12146	0.00421557	-0.298617	-4.9869	O14777	NDC80_HUMAN	NDC80	Kinetochore protein NDC80 homolog
22.2757	22.3959	22.3031	23.5771	23.6248	23.6013	23.6568	23.6099	23.59	+	+	PE3_PE1;PE7_PE1	18	18	0	5.2881	0	1.27615	32.8014	5.20354	0.000287425	1.29398	31.238	O14787	TNPO2_HUMAN	TNPO2	Transportin-2
16.5087	16.5438	16.1245	16.5714	17.0441	17.1812	16.6115	16.7155	16.9338	+	+	PE3_PE1;PE7_PE1	2	2	0	1.11172	0.0333206	0.539874	2.36408	1.03125	0.0436794	0.361272	2.19608	O14791	APOL1_HUMAN	APOL1	Apolipoprotein L1
20.6598	20.7542	20.4468	20.2431	19.9423	19.764	19.8603	20.0673	19.92	+	+	PE3_PE1;PE7_PE1	22	13	0	1.72652	0.00784273	-0.637104	-3.82049	2.44078	0.00266886	-0.671076	-6.11357	O14795	UN13B_HUMAN	UNC13B	Protein unc-13 homolog B
22.5272	22.4863	22.4228	22.6486	22.7552	22.6843	22.7151	22.7402	22.7881	+	+	PE3_PE1;PE7_PE1	57	57	0	2.11972	0.00290999	0.217301	4.98125	2.71401	0.00173788	0.269025	7.23952	O14802	RPC1_HUMAN	POLR3A	DNA-directed RNA polymerase III subunit RPC1
25.9496	25.889	25.913	25.9963	26.0045	25.9969	25.9895	26.0196	25.9783	+	+	PE3_PE1;PE7_PE1	17	12	0	2.00192	0.00382292	0.082058	4.60996	1.66541	0.0102083	0.0786006	3.65862	O14818	PSA7_HUMAN	PSMA7	Proteasome subunit alpha type-7
25.5951	25.5584	25.5738	25.9993	26.0436	26.0209	26.039	26.0768	26.048	+	+	PE3_PE1;PE7_PE1	15	15	0	4.9379	0	0.445512	26.7921	5.17533	0.000271186	0.478884	30.7331	O14828	SCAM3_HUMAN	SCAMP3	Secretory carrier-associated membrane protein 3
20.7756	20.732	20.8804	20.2135	20.0506	20.2654	20.0855	20.0109	20.0136	+	+	PE3_PE1;PE7_PE1	9	9	0	2.86085	0.000653584	-0.619509	-7.91664	3.94839	0.000391459	-0.759322	-15.0827	O14832	PAHX_HUMAN	PHYH	Phytanoyl-CoA dioxygenase
20.2237	19.9119	19.9839	19.4387	19.3421	19.2169	19.5116	19.5561	19.6666	+	+	PE3_PE1;PE7_PE1	14	14	0	2.46367	0.00145901	-0.707273	-6.20176	1.93262	0.00585312	-0.461744	-4.40143	O14867	BACH1_HUMAN	BACH1	Transcription regulator protein BACH1
21.6655	21.9099	21.8181	22.6532	22.7109	22.5417	22.664	22.7597	22.6637	+	+	PE3_PE1;PE7_PE1	8	8	0	3.18876	0.000317739	0.837432	9.64042	3.48593	0.000847059	0.897966	11.498	O14874	BCKD_HUMAN	BCKDK	Branched-chain alpha-ketoacid dehydrogenase kinase
24.0118	23.9407	23.9194	23.6828	23.5189	23.6064	23.5456	23.5163	23.5168	+	+	PE3_PE1;PE7_PE1	4	4	0	2.52726	0.00134898	-0.354596	-6.45238	3.89051	0.000373514	-0.431061	-14.5811	O14880	MGST3_HUMAN	MGST3	Glutathione S-transferase 3
21.245	21.4555	21.4676	20.8547	20.6616	20.6735	20.8284	20.7818	20.7933	+	+	PE3_PE1;PE7_PE1	6	6	0	2.63612	0.00102987	-0.659454	-6.90164	2.8757	0.0012892	-0.588211	-7.98815	O14893	GEMI2_HUMAN	GEMIN2	Gem-associated protein 2
22.2456	22.1404	22.2487	23.1459	23.0558	23.097	23.0236	23.2248	23.0783	+	+	PE3_PE1;PE7_PE1	15	14	0	4.44558	0	0.887995	20.1445	3.67544	0.000658484	0.89734	12.8548	O14908	GIPC1_HUMAN	GIPC1	PDZ domain-containing protein GIPC1
20.6874	20.5324	20.6822	20.2323	20.1254	20.1813	20.2361	20.2627	20.2318	+	+	PE3_PE1;PE7_PE1	21	21	0	2.80265	0.000805296	-0.454381	-7.64178	2.78242	0.00158553	-0.3905	-7.54825	O14920	IKKB_HUMAN	IKBKB	Inhibitor of nuclear factor kappa-B kinase subunit beta
22.0633	22.2325	22.2713	22.2331	22.3023	22.3915	21.9365	22.131	22.2398				5	3	0	0.695182	0.103721	0.119927	1.52582	0.325612	0.433897	-0.0866038	-0.792378	O14925	TIM23_HUMAN	TIMM23	Mitochondrial import inner membrane translocase subunit Tim23
23.4954	23.6962	23.7652	23.566	23.6475	23.6402	23.5016	23.597	23.5063				10	10	0	0.151036	0.836067	-0.0344111	-0.404915	0.606861	0.141443	-0.117312	-1.35375	O14929	HAT1_HUMAN	HAT1	Histone acetyltransferase type B catalytic subunit
24.538	24.3037	24.398	24.1507	24.2058	24.1267	24.022	24.087	24.0322	+	+	PE3_PE1;PE7_PE1	9	9	0	1.60541	0.0104309	-0.252177	-3.50391	2.17373	0.00396043	-0.366194	-5.15892	O14933	UB2L6_HUMAN	UBE2L6	Ubiquitin/ISG15-conjugating enzyme E2 L6
20.3799	20.3795	20.1031	20.2078	20.231	20.2095	20.1454	20.1949	20.0449				20	20	0	0.315691	0.456392	-0.0713882	-0.771604	0.710845	0.103339	-0.1591	-1.55637	O14936	CSKP_HUMAN	CASK	Peripheral plasma membrane protein CASK
25.6359	25.5386	25.5336	25.2193	25.151	25.118	25.4357	25.4044	25.3482	+	+	PE3_PE1;PE7_PE1	5	5	0	3.09184	0.000341598	-0.406627	-9.09807	1.83689	0.00711224	-0.173243	-4.12455	O14949	QCR8_HUMAN	UQCRQ	Cytochrome b-c1 complex subunit 8
25.6164	25.6501	25.68	25.6732	25.6427	25.5653	25.6093	25.6267	25.5625				4	0	0	0.230306	0.695626	-0.0217342	-0.587505	0.86484	0.0682968	-0.0493539	-1.85931	O14950;P19105	ML12A_HUMAN;ML12B_HUMAN	MYL12A;MYL12B	Myosin regulatory light chain 12B
23.9796	24.0006	23.9731	24.0449	24.0487	24.108	24.0223	23.9902	24.0394	+		PE3_PE1	22	22	0	1.70099	0.00830877	0.0827885	3.7523	0.922392	0.0586781	0.0328846	1.9744	O14964	HGS_HUMAN	HGS	Hepatocyte growth factor-regulated tyrosine kinase substrate
22.3653	22.4161	22.0716	22.9253	22.8821	22.9097	22.9283	23.0378	23.0346	+	+	PE3_PE1;PE7_PE1	16	15	0	2.34263	0.00186114	0.621342	5.74725	2.49436	0.00242896	0.715865	6.32166	O14965	AURKA_HUMAN	AURKA	Aurora kinase A
23.3068	23.2644	23.3096	22.7705	22.8023	22.8698	22.8767	22.9205	22.8355	+	+	PE3_PE1;PE7_PE1	10	9	0	3.89885	0	-0.47939	-14.6524	3.8885	0.000372566	-0.416029	-14.564	O14966	RAB7L_HUMAN	RAB29	Ras-related protein Rab-7L1
18.7238	20.4572	22.657	23.105	23.1587	23.1191	23.3055	23.2435	23.2213	+	+	PE3_PE1;PE7_PE1	22	22	1	1.03778	0.0402687	2.51496	2.20958	1.09207	0.0372119	2.64409	2.3227	O14967	CLGN_HUMAN	CLGN	Calmegin
20.7073	20.3956	20.6768	19.0971	19.2895	19.3617	19	19.4905	19.489	+	+	PE3_PE1;PE7_PE1	7	7	0	3.34792	0.000184946	-1.3438	-10.5969	2.57135	0.00218603	-1.26671	-6.63119	O14972	VP26C_HUMAN	VPS26C	Vacuolar protein sorting-associated protein 26C
22.9156	22.8548	22.8447	22.9579	23.0016	22.9592	22.9854	22.9471	23.0173	+	+	PE3_PE1;PE7_PE1	51	50	0	1.73197	0.00766501	0.101212	3.83514	1.68672	0.00969654	0.11156	3.71456	O14974	MYPT1_HUMAN	PPP1R12A	Protein phosphatase 1 regulatory subunit 12A
21.2088	21.0972	21.1534	21.9233	21.9572	21.9182	21.869	21.8979	21.7999	+	+	PE3_PE1;PE7_PE1	34	34	0	4.64638	0	0.779817	22.6321	4.07047	0.000434353	0.702503	16.1963	O14976	GAK_HUMAN	GAK	Cyclin-G-associated kinase
26.6526	26.482	26.6387	26.2282	26.2334	26.2253	26.1165	26.1337	26.1883	+	+	PE3_PE1;PE7_PE1	17	16	0	2.56716	0.00117824	-0.362147	-6.61401	2.7856	0.00159179	-0.444969	-7.56292	O14979	HNRDL_HUMAN	HNRNPDL	Heterogeneous nuclear ribonucleoprotein D-like
24.7168	24.6643	24.6805	25.0991	25.1941	25.0964	25.1129	25.1761	25.1013	+	+	PE3_PE1;PE7_PE1	43	43	0	3.61549	7.93854e-05	0.442658	12.4099	4.03266	0.000421053	0.442898	15.8431	O14980	XPO1_HUMAN	XPO1	Exportin-1
21.3231	21.298	21.2814	21.2523	21.3489	21.2959	21.3467	21.4388	21.2522				50	50	0	0.0196318	0.981748	-0.00179672	-0.0589727	0.337612	0.408209	0.0451139	0.817365	O14981	BTAF1_HUMAN	BTAF1	TATA-binding protein-associated factor 172
18.6415	18.8772	18.3617	17.9985	18.6469	18.5211	18.1916	18.0644	17.8768		+	PE7_PE1	4	4	0	0.406774	0.2885	-0.237977	-0.958822	1.53684	0.0127367	-0.58253	-3.33202	O14986	PI51B_HUMAN	PIP5K1B	Phosphatidylinositol 4-phosphate 5-kinase type-1 beta
20.0457	19.9737	19.7448	19.5721	19.4731	19.583	19.6518	19.7912	19.2659	+		PE3_PE1	12	11	0	1.75408	0.0071012	-0.378684	-3.89496	0.904841	0.0614324	-0.351762	-1.93916	O15014	ZN609_HUMAN	ZNF609	Zinc finger protein 609
18.3582	18.4487	18.3463	18.4228	18.5513	18.4668	17.0931	18.1773	17.9895				15	15	1	0.901001	0.0572549	0.0958805	1.93147	0.874221	0.0667822	-0.631119	-1.87799	O15020	SPTN2_HUMAN	SPTBN2	Spectrin beta chain
23.5291	23.4915	23.5363	23.1647	23.1479	23.1338	23.1365	23.1652	23.1668	+	+	PE3_PE1;PE7_PE1	71	71	0	4.63082	0	-0.370206	-22.429	4.54163	0.000143284	-0.362799	-21.2988	O15027	SC16A_HUMAN	SEC16A	Protein transport protein Sec16A
19.6391	20.0138	19.7228	21.5984	21.5127	21.563	21.5058	21.6729	21.5794	+	+	PE3_PE1;PE7_PE1	45	43	0	3.96089	0	1.76613	15.1932	3.88532	0.000371622	1.79415	14.5369	O15031	PLXB2_HUMAN	PLXNB2	Plexin-B2
19.5484	19.8501	19.7363	19.4464	19.4089	19.4745	18.7392	19.3244	19.2311	+	+	PE3_PE1;PE7_PE1	12	12	0	1.39095	0.0173035	-0.268349	-2.98222	1.41595	0.0170108	-0.613354	-3.04072	O15037	KHNYN_HUMAN	KHNYN	Protein KHNYN
19.0798	19.0443	18.8747	19.048	18.7739	18.644	18.9502	19.1207	18.8668				16	16	0	0.588154	0.145411	-0.177641	-1.31728	0.0729289	0.926658	-0.0203622	-0.207963	O15040	TCPR2_HUMAN	TECPR2	Tectonin beta-propeller repeat-containing protein 2
23.3838	23.2678	23.3509	23.4302	23.4846	23.4615	23.42	23.5405	23.4822	+	+	PE3_PE1;PE7_PE1	37	37	0	1.51653	0.01307	0.124545	3.28207	1.3957	0.0175432	0.146736	2.99331	O15042	SR140_HUMAN	U2SURP	U2 snRNP-associated SURP motif-containing protein
22.8354	22.7605	22.6151	22.2341	22.329	22.1387	22.1132	22.1286	22.1469	+	+	PE3_PE1;PE7_PE1	27	26	0	2.39175	0.00164051	-0.50305	-5.92822	3.12644	0.00120411	-0.607435	-9.28833	O15047	SET1A_HUMAN	SETD1A	Histone-lysine N-methyltransferase SETD1A
20.6353	20.7309	20.812	20.8481	20.9341	20.7497	20.8924	20.843	20.9603		+	PE7_PE1	26	26	0	0.731985	0.0928107	0.11791	1.59766	1.31632	0.0216127	0.172481	2.81095	O15050	TRNK1_HUMAN	TRANK1	TPR and ankyrin repeat-containing protein 1
21.879	21.6755	21.8597	21.7033	21.7659	21.6974	21.708	21.6354	21.6185		+	PE7_PE1	27	18	0	0.530855	0.17729	-0.0825214	-1.20522	1.00403	0.0466148	-0.150746	-2.14009	O15066	KIF3B_HUMAN	KIF3B	Kinesin-like protein KIF3B
22.7185	22.6574	22.6876	22.5854	22.5926	22.5204	22.5943	22.6444	22.6078	+	+	PE3_PE1;PE7_PE1	37	37	0	1.86454	0.00555067	-0.121647	-4.20322	1.45273	0.0155136	-0.0723089	-3.12782	O15067	PUR4_HUMAN	PFAS	Phosphoribosylformylglycinamidine synthase
20.3674	20.1866	17.4327	19.8617	20.019	19.9222	19.9994	20.4295	19.9037				9	9	1	0.252694	0.637768	0.605384	0.636817	0.334933	0.413565	0.781927	0.811798	O15078	CE290_HUMAN	CEP290	Centrosomal protein of 290 kDa
21.9819	21.8922	22.0144	21.9412	21.8206	21.8979	21.7593	21.9709	21.8086				24	23	0	0.683409	0.107055	-0.0763143	-1.50287	0.724453	0.0993027	-0.116548	-1.58294	O15084	ANR28_HUMAN	ANKRD28	Serine/threonine-protein phosphatase 6 regulatory ankyrin repeat subunit A
24.0616	23.9486	23.9809	23.9554	23.9202	24.0169	23.9822	23.8687	23.868				33	33	0	0.304347	0.487014	-0.0328274	-0.747711	0.829567	0.0751591	-0.0907001	-1.78938	O15085	ARHGB_HUMAN	ARHGEF11	Rho guanine nucleotide exchange factor 11
20.6559	20.5593	20.6336	20.2467	20.1041	20.2603	20.2264	20.2519	20.1859	+	+	PE3_PE1;PE7_PE1	20	20	0	2.68935	0.00097768	-0.412547	-7.13104	3.45586	0.000828087	-0.394866	-11.2957	O15091	MRPP3_HUMAN	PRORP	Mitochondrial ribonuclease P catalytic subunit
19.6725	19.3474	19.4417	19.5633	19.3193	19.4691	19.4847	19.4806	19.5413				16	16	0	0.110736	0.885346	-0.0366662	-0.305911	0.0522644	0.950381	0.0149644	0.151904	O15111	IKKA_HUMAN	CHUK	Inhibitor of nuclear factor kappa-B kinase subunit alpha
22.5961	22.5974	22.5562	22.8548	22.7638	22.801	22.6837	22.6602	22.6382	+	+	PE3_PE1;PE7_PE1	5	5	0	2.77654	0.000829755	0.223307	7.52128	1.8314	0.00718221	0.0774797	4.10907	O15116	LSM1_HUMAN	LSM1	U6 snRNA-associated Sm-like protein LSm1
22.2902	22.3215	22.383	22.2708	22.4042	22.2763	22.44	22.4238	22.4389		+	PE7_PE1	20	20	0	0.10102	0.897937	-0.0144577	-0.281255	1.68004	0.00974207	0.102642	3.69696	O15118	NPC1_HUMAN	NPC1	NPC intracellular cholesterol transporter 1
21.6751	21.8246	21.6173	21.6811	22.012	22.0234	21.7703	21.7883	21.707				3	3	0	0.712635	0.0982995	0.199855	1.55987	0.302951	0.490649	0.0495211	0.744761	O15121	DEGS1_HUMAN	DEGS1	Sphingolipid delta(4)-desaturase DES1
24.7836	24.8609	24.8109	25.2515	25.2875	25.2785	25.0609	25.3695	25.2632	+	+	PE3_PE1;PE7_PE1	8	8	0	4.26076	0	0.454025	18.0938	1.94044	0.00575329	0.412722	4.42459	O15126	SCAM1_HUMAN	SCAMP1	Secretory carrier-associated membrane protein 1
24.7541	24.6199	24.6717	24.4485	24.5133	24.5029	24.5978	24.4851	24.5261	+	+	PE3_PE1;PE7_PE1	5	5	0	1.93443	0.00451421	-0.193675	-4.40678	1.33301	0.0207833	-0.145578	-2.84882	O15127	SCAM2_HUMAN	SCAMP2	Secretory carrier-associated membrane protein 2
18.5872	18.5884	18.927	19.7831	19.7759	19.8505	20.2918	19.8533	20.3046	+	+	PE3_PE1;PE7_PE1	4	4	0	3.17119	0.000314368	1.10229	9.53992	2.82978	0.00154828	1.44905	7.76883	O15131	IMA6_HUMAN	KPNA5	Importin subunit alpha-6
25.3364	25.3045	25.2731	24.8804	24.8625	24.8432	24.9248	24.9506	24.9089	+	+	PE3_PE1;PE7_PE1	18	16	0	4.5077	0	-0.442654	-20.8839	4.17073	0.000339056	-0.376603	-17.1705	O15143	ARC1B_HUMAN	ARPC1B	Actin-related protein 2/3 complex subunit 1B
25.7327	25.6399	25.7341	25.2732	25.3592	25.3349	25.259	25.2815	25.2866	+	+	PE3_PE1;PE7_PE1	19	19	0	3.14944	0.000309298	-0.379771	-9.41689	3.72048	0.000680597	-0.426507	-13.1992	O15144	ARPC2_HUMAN	ARPC2	Actin-related protein 2/3 complex subunit 2
25.8843	25.9146	25.9639	25.5359	25.6352	25.5965	25.6074	25.6256	25.5401	+	+	PE3_PE1;PE7_PE1	8	8	0	3.06413	0.000391031	-0.331695	-8.94828	3.15744	0.00107662	-0.329882	-9.46195	O15145	ARPC3_HUMAN	ARPC3	Actin-related protein 2/3 complex subunit 3
23.5519	23.6156	23.5145	23.9431	23.8254	23.8096	23.9289	24.0004	24.1238	+	+	PE3_PE1;PE7_PE1	2	2	0	2.35915	0.00174309	0.298644	5.8076	2.6884	0.00179002	0.456975	7.12688	O15155	BET1_HUMAN	BET1	BET1 homolog
20.4861	20.6863	20.6688	21.1443	20.9766	21.203	21.05	21.2741	20.9861	+	+	PE3_PE1;PE7_PE1	8	8	0	2.21527	0.00240717	0.494237	5.29892	1.9732	0.00527944	0.489669	4.52267	O15156	ZBT7B_HUMAN	ZBTB7B	Zinc finger and BTB domain-containing protein 7B
23.0977	23.0792	23.1169	23.3771	23.4037	23.4269	23.3831	23.4722	23.4563	+	+	PE3_PE1;PE7_PE1	14	14	0	4.14123	0	0.304651	16.878	3.48467	0.000846535	0.339255	11.4895	O15160	RPAC1_HUMAN	POLR1C	DNA-directed RNA polymerases I and III subunit RPAC1
21.4067	21.4651	21.5779	21.3947	21.4878	21.3514	21.5607	21.4325	21.706				4	4	0	0.486215	0.209014	-0.0719268	-1.11735	0.371795	0.345374	0.0831235	0.887777	O15162	PLS1_HUMAN	PLSCR1	Phospholipid scramblase 1
19.0797	19.2956	19.3152	19.2578	19.2292	19.4971	19.5212	19.1975	19.3017				16	16	0	0.359047	0.362041	0.0978807	0.861641	0.379863	0.332817	0.109989	0.904246	O15164	TIF1A_HUMAN	TRIM24	Transcription intermediary factor 1-alpha
24.9198	24.9129	24.857	24.9034	24.9779	24.9376	24.9801	24.9491	24.9438		+	PE7_PE1	11	10	0	0.665236	0.112479	0.0430183	1.46746	1.25314	0.0254279	0.06106	2.66959	O15173	PGRC2_HUMAN	PGRMC2	Membrane-associated progesterone receptor component 2
20.1642	19.9638	20.4979	20.547	20.582	20.5884	20.338	20.378	20.7104	+		PE3_PE1	5	5	0	1.09434	0.0348896	0.363812	2.32747	0.612677	0.138545	0.266795	1.36509	O15182	CETN3_HUMAN	CETN3	Centrin-3
25.2136	25.1303	25.2022	25.6364	25.6973	25.6629	25.5585	25.514	25.5539	+	+	PE3_PE1;PE7_PE1	11	11	0	3.97937	0	0.483506	15.3581	3.57779	0.000693905	0.360071	12.1376	O15212	PFD6_HUMAN	PFDN6	Prefoldin subunit 6
22.2496	22.1518	22.2321	22.2876	22.2878	22.386	22.2745	22.2627	22.2113	+		PE3_PE1	20	20	0	1.15522	0.0299119	0.109305	2.45657	0.462404	0.233696	0.0383218	1.07017	O15213	WDR46_HUMAN	WDR46	WD repeat-containing protein 46
22.8967	22.9279	22.9083	22.5812	22.5878	22.6095	22.5616	22.5791	22.5669	+	+	PE3_PE1;PE7_PE1	39	39	0	4.84874	0	-0.318136	-25.4454	5.27854	0.000325424	-0.341751	-32.6208	O15226	NKRF_HUMAN	NKRF	NF-kappa-B-repressing factor
21.9615	22.0365	22.0082	21.59	21.689	21.6255	21.6051	21.5983	21.6365	+	+	PE3_PE1;PE7_PE1	36	36	0	3.27057	0.000333845	-0.367255	-10.1215	4.01303	0.000414703	-0.388765	-15.6628	O15228	GNPAT_HUMAN	GNPAT	Dihydroxyacetone phosphate acyltransferase
20.3739	19.9859	19.7409	20.1468	19.4193	20.1534	20.2016	19.8808	20.2782				13	13	0	0.155631	0.829876	-0.127038	-0.415902	0.145816	0.838414	0.0866496	0.392364	O15234	CASC3_HUMAN	CASC3	Protein CASC3
22.6875	22.6185	22.7151	23.0995	23.1262	22.9802	23.0955	23.2435	23.2986	+	+	PE3_PE1;PE7_PE1	6	6	0	2.7526	0.000913897	0.39496	7.41228	2.88416	0.00129725	0.538841	8.02915	O15235	RT12_HUMAN	MRPS12	Small ribosomal subunit protein uS12m
18.4271	19.6277	20.4201	18.1715	19.24	19.0284	19.0179	18.7067	17.1085				1	1	1	0.437187	0.254541	-0.678323	-1.01991	0.664576	0.118471	-1.21388	-1.46618	O15239	NDUA1_HUMAN	NDUFA1	NADH dehydrogenase [ubiquinone] 1 alpha subcomplex subunit 1
18.9212	18.9249	18.5294	18.7239	19.1089	18.4806	19.1566	18.5083	18.7028				2	2	0	0.0309173	0.970635	-0.020661	-0.0917805	0.00363998	0.996415	-0.00258891	-0.0111287	O15243	OBRG_HUMAN	LEPROT	Leptin receptor gene-related protein
21.0136	20.7027	20.6377	20.7711	20.6374	20.8109	20.739	20.8783	20.7948				18	18	0	0.129325	0.863252	-0.0448386	-0.352197	0.0543494	0.948224	0.0193698	0.157651	O15254	ACOX3_HUMAN	ACOX3	Peroxisomal acyl-coenzyme A oxidase 3
24.926	24.7634	24.8507	24.913	24.7679	24.8156	24.9837	24.8775	24.9089				6	6	0	0.0806285	0.922011	-0.0145003	-0.228367	0.60793	0.140798	0.0767021	1.35584	O15258	RER1_HUMAN	RER1	Protein RER1
21.8379	21.8788	21.9354	22.1889	22.3839	22.2684	21.9446	21.9453	22.1668	+		PE3_PE1	6	6	0	2.47994	0.00143146	0.396358	6.26507	0.786104	0.0837832	0.134855	1.70371	O15260	SURF4_HUMAN	SURF4	Surfeit locus protein 4
20.7628	20.9275	20.7053	19.0735	18.9934	19.2089	19.3782	19.3745	18.8835	+	+	PE3_PE1;PE7_PE1	10	9	0	4.3112	0	-1.70659	-18.6322	3.06433	0.00116532	-1.58647	-8.94937	O15264	MK13_HUMAN	MAPK13	Mitogen-activated protein kinase 13
17.8878	18.3234	17.1858	17.2132	17.6332	17.47	17.2746	16.9981	17.651				5	5	0	0.437128	0.25455	-0.360217	-1.01979	0.572598	0.158744	-0.491091	-1.28692	O15265	ATX7_HUMAN	ATXN7	Ataxin-7
22.4924	22.5268	22.6113	23.6841	23.721	23.6603	23.6401	23.7699	23.7285	+	+	PE3_PE1;PE7_PE1	20	20	0	5.07496	0	1.14493	29.0014	4.63236	0.000154839	1.16931	22.449	O15269	SPTC1_HUMAN	SPTLC1	Serine palmitoyltransferase 1
19.99	19.8981	19.8757	19.6963	19.7704	19.7888	19.6708	19.8231	20.0217	+		PE3_PE1	17	17	0	1.70741	0.00818596	-0.169474	-3.76938	0.315054	0.458681	-0.0827548	-0.770266	O15270	SPTC2_HUMAN	SPTLC2	Serine palmitoyltransferase 2
22.8049	22.6704	22.7984	21.795	21.7783	21.7867	21.8081	21.5832	21.8956	+	+	PE3_PE1;PE7_PE1	14	14	0	4.60147	0	-0.97127	-22.0507	3.19614	0.00110071	-0.995658	-9.68294	O15287	FANCG_HUMAN	FANCG	Fanconi anemia group G protein
22.913	22.8604	22.8807	22.6683	22.639	22.5824	22.6685	22.6774	22.6801	+	+	PE3_PE1;PE7_PE1	37	37	0	3.00517	0.000417962	-0.2548	-8.63712	3.73539	0.000689342	-0.209399	-13.3151	O15294	OGT1_HUMAN	OGT	UDP-N-acetylglucosamine--peptide N-acetylglucosaminyltransferase 110 kDa subunit
13.6784	13.3974	13.4647	14.2414	16.8734	13.6293	13.4973	14.0303	13.8641				2	2	1	0.632122	0.125451	1.40122	1.40297	0.726525	0.0988197	0.283763	1.58699	O15297	PPM1D_HUMAN	PPM1D	Protein phosphatase 1D
24.9236	24.9697	24.9184	23.5805	23.7168	23.6172	23.6746	23.5635	23.5788	+	+	PE3_PE1;PE7_PE1	16	14	0	5.11128	0	-1.29904	-29.6165	5.38474	0.000375	-1.33157	-34.6834	O15305	PMM2_HUMAN	PMM2	Phosphomannomutase 2
18.3347	18.2362	18.296	19.3889	19.2307	19.0251	19.1118	19.1431	19.5113	+	+	PE3_PE1;PE7_PE1	5	5	0	2.97532	0.000505963	0.925939	8.48339	2.73965	0.00171363	0.966445	7.35391	O15318	RPC7_HUMAN	POLR3G	DNA-directed RNA polymerase III subunit RPC7
22.104	21.9015	22.0093	22.0617	22.0794	22.1331	22.0476	22.0385	22.1033				12	12	0	0.624375	0.128967	0.086462	1.38788	0.397863	0.305798	0.0582326	0.940808	O15321	TM9S1_HUMAN	TM9SF1	Transmembrane 9 superfamily member 1
23.5646	23.3236	23.4727	24.463	24.4972	24.434	24.3886	24.5631	24.4975	+	+	PE3_PE1;PE7_PE1	8	8	0	3.81316	9.20564e-05	1.01112	13.936	3.54011	0.000803629	1.02948	11.8713	O15347	HMGB3_HUMAN	HMGB3	High mobility group protein B3
24.7243	24.6834	24.7067	24.4235	24.3996	24.4284	24.4335	24.3638	24.4495	+	+	PE3_PE1;PE7_PE1	23	23	0	4.3815	0	-0.287641	-19.4089	3.25395	0.00094687	-0.289167	-10.0219	O15355	PPM1G_HUMAN	PPM1G	Protein phosphatase 1G
22.0978	22.0625	22.0613	22.232	22.1898	22.1985	22.2017	22.1894	22.1724	+	+	PE3_PE1;PE7_PE1	49	49	0	2.78501	0.00079661	0.132913	7.56017	2.82989	0.00154953	0.114	7.76935	O15357	SHIP2_HUMAN	INPPL1	Phosphatidylinositol 3
18.3277	18.2347	18.2074	17.9744	17.2277	17.513	18.1445	17.9742	17.926	+	+	PE3_PE1;PE7_PE1	8	8	2	1.4432	0.0154978	-0.684888	-3.10514	1.48088	0.0144769	-0.241688	-3.19538	O15360	FANCA_HUMAN	FANCA	Fanconi anemia group A protein
25.3629	25.312	25.2857	25.2325	25.3067	25.2252	25.2964	25.2748	25.2767				18	18	0	0.882649	0.0603444	-0.065431	-1.89479	0.726249	0.0988832	-0.0375875	-1.58645	O15371	EIF3D_HUMAN	EIF3D	Eukaryotic translation initiation factor 3 subunit D
24.3451	24.3595	24.3757	24.3088	24.3689	24.3464	24.1933	24.2812	24.2135		+	PE7_PE1	19	19	0	0.403835	0.29234	-0.0187232	-0.952887	2.01956	0.00499619	-0.13077	-4.66419	O15372	EIF3H_HUMAN	EIF3H	Eukaryotic translation initiation factor 3 subunit H
21.176	21.1097	21.112	20.6096	20.7748	20.5806	20.815	20.7171	20.7207	+	+	PE3_PE1;PE7_PE1	12	12	0	2.75701	0.00091771	-0.47757	-7.43228	3.22596	0.000996382	-0.381653	-9.85644	O15379	HDAC3_HUMAN	HDAC3	Histone deacetylase 3
21.1544	21.1793	21.0876	21.4085	21.4621	21.3662	21.419	21.5273	21.4704	+	+	PE3_PE1;PE7_PE1	33	33	0	2.65302	0.000959425	0.271819	6.97375	2.87482	0.0012876	0.331806	7.98389	O15381	NVL_HUMAN	NVL	Nuclear valosin-containing protein-like
24.0997	24.008	24.0062	24.3413	24.3849	24.4722	24.3417	24.36	24.3135	+	+	PE3_PE1;PE7_PE1	18	18	0	2.73413	0.000907727	0.361534	7.32914	3.057	0.00115819	0.300433	8.9101	O15382	BCAT2_HUMAN	BCAT2	Branched-chain-amino-acid aminotransferase
18.94	18.2639	18.5528	18.4436	18.3424	18.3464	18.8167	18.632	18.6712				7	7	0	0.451213	0.239898	-0.208129	-1.0479	0.233244	0.683187	0.121028	0.594025	O15392	BIRC5_HUMAN	BIRC5	Baculoviral IAP repeat-containing protein 5
26.6111	26.6111	26.6476	26.347	26.4721	26.3803	26.4711	26.3452	26.4662	+	+	PE3_PE1;PE7_PE1	23	23	0	2.32355	0.00197103	-0.223434	-5.6782	1.98426	0.0052498	-0.195754	-4.55615	O15397	IPO8_HUMAN	IPO8	Importin-8
23.0807	23.0847	23.0242	22.8522	22.8713	22.8172	22.8692	22.8254	22.8489	+	+	PE3_PE1;PE7_PE1	8	8	0	2.99754	0.000416703	-0.21631	-8.59756	3.11967	0.00119941	-0.215398	-9.25085	O15400	STX7_HUMAN	STX7	Syntaxin-7
22.9381	23.0001	22.9665	22.7633	22.8954	22.8337	22.7548	22.5978	22.6821	+	+	PE3_PE1;PE7_PE1	10	10	0	1.50762	0.0132793	-0.137458	-3.26027	2.39649	0.00291517	-0.289979	-5.94595	O15427	MOT4_HUMAN	SLC16A3	Monocarboxylate transporter 4
21.7819	21.9648	22.0745	21.291	21.2119	21.2658	21.4449	21.1868	21.2789	+	+	PE3_PE1;PE7_PE1	2	2	0	2.82209	0.000777647	-0.684152	-7.73263	2.29848	0.0031853	-0.636848	-5.58849	O15431	COPT1_HUMAN	SLC31A1	High affinity copper uptake protein 1
23.6882	23.0885	23.4129	24.3692	24.4932	24.4396	24.5887	24.4477	24.5018	+	+	PE3_PE1;PE7_PE1	19	17	0	2.37376	0.00172153	1.03748	5.86141	2.48031	0.00249312	1.1162	6.26652	O15440	MRP5_HUMAN	ABCC5	ATP-binding cassette sub-family C member 5
22.3272	22.3324	22.2822	22.5765	22.6627	22.6809	22.6924	22.6331	22.5522	+	+	PE3_PE1;PE7_PE1	14	14	0	3.0875	0.000340659	0.32609	9.07445	2.69258	0.0017947	0.311961	7.14515	O15446	RPA34_HUMAN	POLR1G	DNA-directed RNA polymerase I subunit RPA34
21.3739	21.3998	21.4263	22.1655	22.157	22.1409	21.8873	22.1216	22.1015	+	+	PE3_PE1;PE7_PE1	18	18	0	5.8378	0	0.754486	45.0435	2.94388	0.00134542	0.636816	8.32416	O15460	P4HA2_HUMAN	P4HA2	Prolyl 4-hydroxylase subunit alpha-2
22.5729	18.795	23.288	25.24	25.2098	25.1835	25.1696	25.249	25.1229	+	+	PE3_PE1;PE7_PE1	14	13	1	1.23294	0.0248063	3.65918	2.62507	1.22259	0.0273446	3.62857	2.60239	O15479	MAGB2_HUMAN	MAGEB2	Melanoma-associated antigen B2
24.1408	24.1106	24.0895	24.5339	24.5482	24.5724	24.5837	24.5863	24.5659	+	+	PE3_PE1;PE7_PE1	13	13	0	4.71118	0	0.437862	23.4978	5.05661	0.000238213	0.464989	28.6955	O15498	YKT6_HUMAN	YKT6	Synaptobrevin homolog YKT6
20.7132	20.3022	20.7375	21.0565	20.9131	20.9273	20.8611	20.9675	21.078	+	+	PE3_PE1;PE7_PE1	14	14	0	1.20762	0.0264053	0.381353	2.56971	1.17064	0.031034	0.38459	2.48967	O15504	NUP42_HUMAN	NUP42	Nucleoporin NUP42
25.3924	25.3346	25.3771	24.7296	24.7686	24.7539	24.767	24.7447	24.7546	+	+	PE3_PE1;PE7_PE1	7	7	0	5.12269	0	-0.617336	-29.8125	5.30865	0.000340426	-0.612609	-33.1928	O15511	ARPC5_HUMAN	ARPC5	Actin-related protein 2/3 complex subunit 5
22.1834	21.8971	21.7305	21.7687	21.7277	21.7302	21.5504	21.8592	21.7279				8	8	0	0.6641	0.112855	-0.194778	-1.46525	0.633689	0.129871	-0.224519	-1.40602	O15514	RPB4_HUMAN	POLR2D	DNA-directed RNA polymerase II subunit RPB4
12.4385	15.9282	17.2237	15.7328	16.4374	16.8355	16.7588	16.8671	16.8023				3	3	1	0.31834	0.449806	1.13845	0.777159	0.491726	0.209225	1.61259	1.12823	O15516	CLOCK_HUMAN	CLOCK	Circadian locomoter output cycles protein kaput
14.9391	16.1339	14.8794	15.0738	15.2007	14.7626	14.8081	17.9116	14.4355				5	5	1	0.287289	0.536492	-0.305086	-0.711492	0.124856	0.866538	0.40094	0.341171	O15519	CFLAR_HUMAN	CFLAR	CASP8 and FADD-like apoptosis regulator
21.7297	21.7019	21.5941	21.013	21.1423	20.9348	21.1516	21.1913	21.2975	+	+	PE3_PE1;PE7_PE1	8	4	0	3.0366	0.00038448	-0.645189	-8.80176	2.81204	0.00161022	-0.461787	-7.68552	O15525	MAFG_HUMAN	MAFG	Transcription factor MafG
17.2422	17.7881	17.4457	17.3416	17.3349	16.379	16.2283	17.5506	16.3152				2	2	2	0.592328	0.143696	-0.473475	-1.32542	0.80553	0.0800239	-0.793923	-1.74193	O15527	OGG1_HUMAN	OGG1	N-glycosylase/DNA lyase
18.3657	18.3045	17.8121	18.4546	18.5623	18.3078	18.8765	18.4624	18.6466		+	PE7_PE1	5	5	0	0.670126	0.110978	0.280807	1.47699	1.10997	0.0358583	0.50104	2.36038	O15528	CP27B_HUMAN	CYP27B1	25-hydroxyvitamin D-1 alpha hydroxylase
20.9869	20.8017	20.8719	19.9153	20.065	19.9225	19.8778	20.0653	20.0654	+	+	PE3_PE1;PE7_PE1	17	3	0	3.64668	8.14717e-05	-0.919238	-12.6395	3.36446	0.000884876	-0.884018	-10.7013	O15530	PDPK1_HUMAN	PDPK1	3-phosphoinositide-dependent protein kinase 1
25.4933	25.7823	25.8635	26.1534	26.2397	26.1777	26.0839	26.1717	26.1692	+	+	PE3_PE1;PE7_PE1	8	8	0	1.84261	0.00585339	0.477196	4.14075	1.6791	0.00973743	0.428531	3.69449	O15533	TPSN_HUMAN	TAPBP	Tapasin
21.7357	21.5556	21.67	21.946	22.0371	21.8421	22.1898	21.8776	22.1376	+	+	PE3_PE1;PE7_PE1	6	5	0	1.69481	0.00848276	0.287956	3.73594	1.70779	0.00926458	0.414595	3.77039	O15541	R113A_HUMAN	RNF113A	E3 ubiquitin-protein ligase RNF113A
20.6385	20.8632	20.7116	21.0108	20.8153	20.6616	20.7453	20.5346	20.6228				18	11	0	0.308774	0.474603	0.0914427	0.757054	0.502565	0.201785	-0.103524	-1.14961	O15550	KDM6A_HUMAN	KDM6A	Lysine-specific demethylase 6A
25.5051	25.5156	25.5452	25.3004	25.3678	25.3494	25.2747	25.3433	25.3215	+	+	PE3_PE1;PE7_PE1	39	39	0	2.83564	0.00069462	-0.182769	-7.79651	3.04944	0.00115007	-0.208825	-8.86983	O43143	DHX15_HUMAN	DHX15	ATP-dependent RNA helicase DHX15
24.1895	24.205	24.2649	23.4512	23.488	23.4839	23.4582	23.4596	23.3896	+	+	PE3_PE1;PE7_PE1	28	28	0	5.07028	0	-0.745448	-28.9231	4.7529	0.000174863	-0.784032	-24.0723	O43148	MCES_HUMAN	RNMT	mRNA cap guanine-N7 methyltransferase
21.2393	21.2518	21.2916	21.1329	21.2518	21.2338	21.2127	21.168	21.3107				39	39	0	0.610087	0.135219	-0.054718	-1.36004	0.270565	0.585024	-0.0303987	-0.675609	O43149	ZZEF1_HUMAN	ZZEF1	Zinc finger ZZ-type and EF-hand domain-containing protein 1
25.3682	25.1466	25.3343	25.0188	25.0502	24.952	24.9434	25.0612	25.0055	+	+	PE3_PE1;PE7_PE1	24	24	0	1.67849	0.0088241	-0.276002	-3.69289	1.65777	0.0102503	-0.279648	-3.63868	O43156	TTI1_HUMAN	TTI1	TELO2-interacting protein 1 homolog
21.5098	21.6909	21.5126	21.2237	21.2427	21.2718	21.3714	21.3134	21.3813	+	+	PE3_PE1;PE7_PE1	19	19	0	2.21068	0.00246509	-0.325017	-5.28331	1.56214	0.0121223	-0.215714	-3.39485	O43159	RRP8_HUMAN	RRP8	Ribosomal RNA-processing protein 8
19.4153	19.1772	19.2469	19.1254	19.1604	18.9733	19.2227	19.4069	18.9653	+		PE3_PE1	9	8	0	0.996341	0.0441959	-0.19345	-2.12436	0.216676	0.719683	-0.0814819	-0.557052	O43164	PJA2_HUMAN	PJA2	E3 ubiquitin-protein ligase Praja-2
25.706	25.5654	25.6263	24.7675	24.7741	24.7571	24.8122	24.8412	24.8342	+	+	PE3_PE1;PE7_PE1	3	3	0	4.52715	0	-0.866355	-21.1208	4.37102	0.000243038	-0.803392	-19.2911	O43169	CYB5B_HUMAN	CYB5B	Cytochrome b5 type B
23.5916	23.6323	23.6281	23.0577	23.0775	23.0098	23.0297	22.9876	22.974	+	+	PE3_PE1;PE7_PE1	27	27	0	4.73434	0	-0.568994	-23.8151	5.09254	0.000248705	-0.620226	-29.2976	O43172	PRP4_HUMAN	PRPF4	U4/U6 small nuclear ribonucleoprotein Prp4
25.94	25.8928	25.9321	25.4325	25.4561	25.4374	25.6744	25.686	25.6833	+	+	PE3_PE1;PE7_PE1	22	22	0	5.10328	0	-0.479627	-29.4799	4.0512	0.000428016	-0.240401	-16.0153	O43175	SERA_HUMAN	PHGDH	D-3-phosphoglycerate dehydrogenase
24.7759	24.7419	24.8011	23.229	23.1804	23.276	23.315	23.3402	23.2907	+	+	PE3_PE1;PE7_PE1	5	5	0	5.93002	0	-1.54452	-47.5031	6.48134	0.00177778	-1.45769	-65.2684	O43181	NDUS4_HUMAN	NDUFS4	NADH dehydrogenase [ubiquinone] iron-sulfur protein 4
22.6179	22.5262	22.4968	22.3828	22.2003	22.352	22.5272	22.4355	22.4154	+		PE3_PE1	15	15	0	1.60519	0.0104285	-0.235282	-3.50337	0.80834	0.0795041	-0.0876052	-1.74747	O43189	PHF1_HUMAN	PHF1	PHD finger protein 1
21.554	21.5401	21.4815	20.3358	20.4367	20.3501	20.2897	20.1018	20.1648	+	+	PE3_PE1;PE7_PE1	12	12	0	5.12507	0	-1.15101	-29.8536	4.63684	0.00015534	-1.33978	-22.5073	O43237	DC1L2_HUMAN	DYNC1LI2	Cytoplasmic dynein 1 light intermediate chain 2
25.5244	25.505	25.5223	25.3118	25.3166	25.287	25.3405	25.4042	25.3761	+	+	PE3_PE1;PE7_PE1	37	37	0	4.36372	0	-0.212132	-19.2095	2.74836	0.00167861	-0.143636	-7.39314	O43242	PSMD3_HUMAN	PSMD3	26S proteasome non-ATPase regulatory subunit 3
20.2931	20.6329	20.616	20.6778	20.8235	20.353	20.9503	20.4828	21.3135				5	1	0	0.229691	0.696795	0.10413	0.586138	0.69087	0.110017	0.401553	1.51741	O43251	RFOX2_HUMAN	RBFOX2	RNA binding protein fox-1 homolog 2
25.0516	24.9244	25.0021	24.2185	24.2347	24.2133	24.2643	24.2352	24.1748	+	+	PE3_PE1;PE7_PE1	27	25	0	4.4761	0	-0.770583	-20.5044	4.14344	0.000332632	-0.767947	-16.8997	O43252	PAPS1_HUMAN	PAPSS1	Bifunctional 3'-phosphoadenosine 5'-phosphosulfate synthase 1
19.7199	19.2987	19.5718	19.6113	19.886	19.7174	19.7142	19.7409	19.6606				4	2	0	0.638642	0.122689	0.208102	1.41567	0.627712	0.13269	0.175105	1.39438	O43255	SIAH2_HUMAN	SIAH2	E3 ubiquitin-protein ligase SIAH2
16.0021	16.8101	16.244	16.4732	16.9635	16.7219	16.8549	16.3527	16.4867				4	4	0	0.590247	0.144587	0.367496	1.32136	0.306702	0.479646	0.212697	0.752685	O43257	ZNHI1_HUMAN	ZNHIT1	Zinc finger HIT domain-containing protein 1
22.4525	22.4234	22.4275	22.6796	22.6319	22.71	22.6308	22.675	22.711	+	+	PE3_PE1;PE7_PE1	33	33	0	3.21408	0.000323092	0.239393	9.78697	3.17324	0.00108744	0.237785	9.55158	O43264	ZW10_HUMAN	ZW10	Centromere/kinetochore protein zw10 homolog
20.2819	20.1385	20.2563	18.5393	18.3239	18.2896	18.4645	18.2112	18.4241	+	+	PE3_PE1;PE7_PE1	16	16	0	4.47687	0	-1.84136	-20.5137	4.48595	0.000134078	-1.85901	-20.6221	O43278	SPIT1_HUMAN	SPINT1	Kunitz-type protease inhibitor 1
23.2646	23.2083	23.2511	22.9303	22.9218	22.9753	22.9399	22.9523	22.9244	+	+	PE3_PE1;PE7_PE1	39	39	0	3.64044	8.10988e-05	-0.298896	-12.5932	4.06062	0.000430528	-0.302502	-16.1036	O43290	SNUT1_HUMAN	SART1	U4/U6.U5 tri-snRNP-associated protein 1
23.3763	23.4329	23.45	23.6351	23.7128	23.6339	23.7042	23.6705	23.6426	+	+	PE3_PE1;PE7_PE1	13	13	0	2.66466	0.000967065	0.240852	7.02382	3.04779	0.00119272	0.252662	8.86105	O43292	GPAA1_HUMAN	GPAA1	Glycosylphosphatidylinositol anchor attachment 1 protein
21.6034	21.6896	21.7296	21.6643	21.8731	21.6471	21.6091	21.9372	21.9666				5	5	0	0.263852	0.60709	0.0539659	0.661093	0.608127	0.140677	0.163421	1.35622	O43293	DAPK3_HUMAN	DAPK3	Death-associated protein kinase 3
17.4653	18.5183	17.903	17.1597	17.8111	17.917	17.5009	18.0107	17.7738				4	4	0	0.359014	0.362038	-0.332946	-0.861574	0.23192	0.686388	-0.200423	-0.591087	O43298	ZBT43_HUMAN	ZBTB43	Zinc finger and BTB domain-containing protein 43
18.6603	18.5013	18.7511	18.5584	18.5609	18.6839	18.4489	18.4512	18.679				12	12	0	0.163589	0.818271	-0.0365009	-0.434799	0.453781	0.241368	-0.111205	-1.05302	O43299	AP5Z1_HUMAN	AP5Z1	AP-5 complex subunit zeta-1
17.2168	17.5052	17.6382	16.9233	17.2943	17.3367	17.3338	17.3533	17.4938				10	10	0	0.674535	0.109363	-0.26867	-1.48558	0.168217	0.804909	-0.05981	-0.445714	O43303	CP110_HUMAN	CCP110	Centriolar coiled-coil protein of 110 kDa
20.4319	20.0296	20.3712	20.0308	20.3822	19.9084	20.0529	19.9978	20.0096				13	13	0	0.377923	0.330872	-0.170446	-0.900292	0.953829	0.0535871	-0.257458	-2.03784	O43310	CTIF_HUMAN	CTIF	CBP80/20-dependent translation initiation factor
25.0388	24.9682	24.9623	24.7736	24.6597	24.6793	24.6847	24.7918	24.6802	+	+	PE3_PE1;PE7_PE1	42	34	0	2.57823	0.00118759	-0.285556	-6.65948	2.45299	0.00257115	-0.270842	-6.16048	O43314	VIP2_HUMAN	PPIP5K2	Inositol hexakisphosphate and diphosphoinositol-pentakisphosphate kinase 2
21.3565	21.2767	20.7767	21.0875	20.9728	20.822	20.6444	21.1059	20.9522				9	9	0	0.37408	0.336883	-0.175872	-0.892446	0.447634	0.247611	-0.235809	-1.04077	O43318	M3K7_HUMAN	MAP3K7	Mitogen-activated protein kinase kinase kinase 7
25.2812	25.2676	25.2356	25.2095	25.2198	25.2231	25.3237	25.2685	25.2671	+		PE3_PE1	10	10	0	1.45007	0.0152266	-0.0439968	-3.12148	0.469682	0.226979	0.0249532	1.08461	O43324	MCA3_HUMAN	EEF1E1	Eukaryotic translation elongation factor 1 epsilon-1
19.3599	19.1947	19.3708	19.2569	18.8414	19.1678	19.112	19.277	19.3158				3	3	0	0.726178	0.0941346	-0.219786	-1.58631	0.363244	0.359282	-0.0735645	-0.870262	O43325	LYRM1_HUMAN	LYRM1	LYR motif-containing protein 1
21.5941	21.871	21.9239	21.512	21.3649	21.4161	21.2548	21.4387	21.4451	+	+	PE3_PE1;PE7_PE1	12	11	0	1.5206	0.0130423	-0.365319	-3.29204	1.59585	0.0115149	-0.416815	-3.47965	O43353	RIPK2_HUMAN	RIPK2	Receptor-interacting serine/threonine-protein kinase 2
20.3573	20.53	20.529	20.9573	20.8438	21.0325	21.0696	21.0288	21.1078	+	+	PE3_PE1;PE7_PE1	28	28	0	2.39744	0.00157716	0.472422	5.94951	3.19155	0.00109904	0.596596	9.65646	O43379	WDR62_HUMAN	WDR62	WD repeat-containing protein 62
27.4747	27.4794	27.4878	27.158	27.1769	27.1421	27.1557	27.2107	27.1722	+	+	PE3_PE1;PE7_PE1	34	26	0	5.12647	0	-0.32167	-29.8777	4.25176	0.000217687	-0.301125	-17.9994	O43390	HNRPR_HUMAN	HNRNPR	Heterogeneous nuclear ribonucleoprotein R
23.7911	23.7738	23.8095	23.3415	23.3025	23.3167	23.2897	23.2544	23.27	+	+	PE3_PE1;PE7_PE1	29	29	0	5.17068	0	-0.471237	-30.6505	5.4418	0.000401674	-0.520076	-35.8448	O43395	PRPF3_HUMAN	PRPF3	U4/U6 small nuclear ribonucleoprotein Prp3
25.8897	25.9975	26.0199	25.2679	25.407	25.3518	25.1617	25.306	25.2645	+	+	PE3_PE1;PE7_PE1	17	17	0	3.41012	0.000139013	-0.626837	-10.9945	3.60519	0.000708134	-0.72496	-12.3349	O43396	TXNL1_HUMAN	TXNL1	Thioredoxin-like protein 1
25.295	25.2452	25.2433	25.6999	25.6572	25.6358	25.6169	25.6707	25.6608	+	+	PE3_PE1;PE7_PE1	15	15	0	4.04125	0	0.403121	15.9227	4.09311	0.000317588	0.388294	16.4114	O43399	TPD54_HUMAN	TPD52L2	Tumor protein D54
23.3786	23.3378	23.4396	22.9212	23.0051	22.9641	22.8879	22.9447	23.0718	+	+	PE3_PE1;PE7_PE1	12	12	0	3.41648	0.000139561	-0.421865	-11.0359	2.59778	0.00209294	-0.417179	-6.74044	O43402	EMC8_HUMAN	EMC8	ER membrane protein complex subunit 8
22.4946	22.6727	22.3706	22.5406	22.529	22.4985	22.3526	22.5758	22.5729				7	7	0	0.0387625	0.963042	0.0101121	0.114158	0.0359083	0.965049	-0.0121619	-0.106056	O43414	ERI3_HUMAN	ERI3	ERI1 exoribonuclease 3
20.5959	20.5288	20.5764	20.2679	20.6463	20.3646	20.4084	20.5554	20.4821				16	16	0	0.539034	0.172872	-0.140746	-1.22126	0.842115	0.0723942	-0.0850747	-1.81421	O43422	P52K_HUMAN	THAP12	52 kDa repressor of the inhibitor of the protein kinase
20.844	20.6112	20.7575	20.0592	19.9973	20.0551	20.1282	20.1295	20.0416	+	+	PE3_PE1;PE7_PE1	40	39	0	3.23235	0.000326817	-0.700367	-9.894	3.00427	0.00130985	-0.637806	-8.63244	O43426	SYNJ1_HUMAN	SYNJ1	Synaptojanin-1
23.0349	23.0578	23.0831	23.2303	23.2346	23.2406	23.1287	23.1554	23.2341	+	+	PE3_PE1;PE7_PE1	19	19	0	3.61541	7.93346e-05	0.176577	12.4093	1.5248	0.0131545	0.114151	3.30235	O43427	FIBP_HUMAN	FIBP	Acidic fibroblast growth factor intracellular-binding protein
21.5642	21.5552	21.5721	21.7562	21.6327	21.7907	21.6778	21.7255	21.7603	+	+	PE3_PE1;PE7_PE1	47	47	0	1.55443	0.0118583	0.162715	3.37564	2.52774	0.00231254	0.157424	6.45429	O43432	IF4G3_HUMAN	EIF4G3	Eukaryotic translation initiation factor 4 gamma 3
24.9435	24.8752	24.9125	24.3489	24.323	24.3058	24.3034	24.2893	24.277	+	+	PE3_PE1;PE7_PE1	11	11	0	4.8169	0	-0.584535	-24.9808	5.09241	0.000248062	-0.620504	-29.2954	O43447	PPIH_HUMAN	PPIH	Peptidyl-prolyl cis-trans isomerase H
20.5554	20.4527	20.0664	20.8493	21.1792	20.6563	20.6187	20.7006	21.254	+		PE3_PE1	4	4	0	1.1834	0.0278442	0.536718	2.51717	0.938562	0.0559449	0.499603	2.00697	O43462	MBTP2_HUMAN	MBTPS2	Membrane-bound transcription factor site-2 protease
20.039	19.9057	19.7146	19.361	19.2689	19.3071	19.324	19.4979	19.3398	+	+	PE3_PE1;PE7_PE1	13	13	0	2.37532	0.00172367	-0.574122	-5.8672	1.98798	0.00522629	-0.499188	-4.56745	O43463	SUV91_HUMAN	SUV39H1	Histone-lysine N-methyltransferase SUV39H1
22.2956	22.2138	22.1979	22.5151	22.4402	22.4587	22.5191	22.6353	22.4046	+	+	PE3_PE1;PE7_PE1	13	12	0	2.47475	0.00142866	0.235626	6.24482	1.7492	0.00833905	0.283946	3.88169	O43464	HTRA2_HUMAN	HTRA2	Serine protease HTRA2
18.6133	18.6842	18.6633	17.8913	17.571	17.6136	18.1076	17.967	17.4212	+	+	PE3_PE1;PE7_PE1	3	3	0	3.1414	0.00030842	-0.961595	-9.37174	1.75773	0.00821011	-0.82166	-3.90489	O43482	MS18B_HUMAN	OIP5	Protein Mis18-beta
23.7202	23.796	23.8007	23.6408	23.6138	23.628	23.5686	23.611	23.6243	+	+	PE3_PE1;PE7_PE1	13	9	0	2.22163	0.00237612	-0.144771	-5.32063	2.27754	0.00327228	-0.171052	-5.51444	O43488	ARK72_HUMAN	AKR7A2	Aflatoxin B1 aldehyde reductase member 2
22.0757	22.1927	22.0983	22.6813	22.722	22.7501	22.6337	22.651	22.7007	+	+	PE3_PE1;PE7_PE1	42	36	0	3.88239	0	0.595568	14.5121	3.71195	0.000675056	0.539557	13.1333	O43491	E41L2_HUMAN	EPB41L2	Band 4.1-like protein 2
24.8766	24.8784	24.8539	25.4012	25.3623	25.3579	25.4571	25.492	25.4412	+	+	PE3_PE1;PE7_PE1	17	17	0	5.23294	0	0.504168	31.7729	5.40098	0.000380952	0.593787	35.0101	O43493	TGON2_HUMAN	TGOLN2	Trans-Golgi network integral membrane protein 2
22.7133	22.8072	22.748	22.8789	22.9137	23.2574	23.0455	23.1736	23.0895	+	+	PE3_PE1;PE7_PE1	7	7	0	0.986352	0.0454208	0.260539	2.10395	2.76131	0.00160405	0.346726	7.45178	O43502	RA51C_HUMAN	RAD51C	DNA repair protein RAD51 homolog 3
24.0586	23.8694	23.9688	23.4994	23.6873	23.5376	23.5814	23.5922	23.5212	+	+	PE3_PE1;PE7_PE1	5	5	0	2.10535	0.00299671	-0.390862	-4.93478	2.61154	0.00201931	-0.400683	-6.79788	O43504	LTOR5_HUMAN	LAMTOR5	Ragulator complex protein LAMTOR5
21.4358	21.1453	21.8668	22.2791	22.6378	22.5791	22.5207	22.3974	22.6189	+	+	PE3_PE1;PE7_PE1	5	5	0	1.89235	0.00536598	1.01606	4.28341	2.03063	0.00479759	1.02974	4.69846	O43505	B4GA1_HUMAN	B4GAT1	Beta-1
18.5153	17.8177	17.5722	18.2143	17.556	18.3557	17.6774	17.9806	18.0718				1	1	1	0.0685958	0.933801	0.0736097	0.196369	0.0664913	0.934008	-0.0584761	-0.190708	O43513	MED7_HUMAN	MED7	Mediator of RNA polymerase II transcription subunit 7
23.7551	23.5612	23.5923	23.3602	23.2954	23.321	23.187	23.1948	23.1935	+	+	PE3_PE1;PE7_PE1	24	24	0	2.10361	0.00299342	-0.31068	-4.92916	2.74619	0.00167732	-0.444442	-7.38336	O43516	WIPF1_HUMAN	WIPF1	WAS/WASL-interacting protein family member 1
21.9836	21.9246	21.8625	20.3367	19.9965	20.2542	20.3198	20.1837	20.3151	+	+	PE3_PE1;PE7_PE1	7	7	0	4.045	0	-1.72778	-15.9576	5.0827	0.000244275	-1.65074	-29.1315	O43521	B2L11_HUMAN	BCL2L11	Bcl-2-like protein 11
20.2749	20.5729	20.0509	21.0836	21.0384	20.986	20.9327	20.9061	20.7964	+	+	PE3_PE1;PE7_PE1	12	9	0	2.05916	0.00337137	0.736429	4.78767	1.67746	0.00973048	0.578842	3.69017	O43524	FOXO3_HUMAN	FOXO3	Forkhead box protein O3
16.81	16.0458	16.3168	15.7393	16.9636	15.8343	15.8545	15.031	15.9315		+	PE7_PE1	3	3	2	0.177795	0.797826	-0.21178	-0.468136	1.00994	0.0459378	-0.785188	-2.15223	O43542	XRCC3_HUMAN	XRCC3	DNA repair protein XRCC3
22.2563	22.1876	22.1692	21.7371	21.6186	21.7941	21.8286	21.7928	21.7681	+	+	PE3_PE1;PE7_PE1	25	25	0	2.95848	0.000501477	-0.487747	-8.39776	3.67118	0.000656587	-0.407888	-12.8227	O43566	RGS14_HUMAN	RGS14	Regulator of G-protein signaling 14
21.4518	21.8115	21.7978	21.4163	21.3753	21.4371	21.1499	21.5677	21.0593	+	+	PE3_PE1;PE7_PE1	6	6	0	1.09555	0.0347607	-0.27748	-2.33002	1.02599	0.0441667	-0.428056	-2.18525	O43567	RNF13_HUMAN	RNF13	E3 ubiquitin-protein ligase RNF13
20.5852	20.4515	20.2589	20.5822	20.3224	20.5382	20.4988	20.0626	20.3835				9	9	0	0.146934	0.840803	0.0490475	0.395058	0.293686	0.517904	-0.116919	-0.725118	O43572	AKA10_HUMAN	AKAP10	A-kinase anchor protein 10
23.6468	23.8229	23.7997	23.3679	23.3889	23.3948	23.3398	23.4383	23.2952	+	+	PE3_PE1;PE7_PE1	9	9	0	2.58159	0.00115154	-0.372615	-6.67331	2.33827	0.00314259	-0.398697	-5.73143	O43583	DENR_HUMAN	DENR	Density-regulated protein
23.6958	23.5912	23.6674	23.5696	23.5301	23.5654	23.5334	23.5872	23.6202	+		PE3_PE1	31	31	0	1.34036	0.0191626	-0.0964362	-2.8656	0.819887	0.0771062	-0.071174	-1.77025	O43592	XPOT_HUMAN	XPOT	Exportin-T
24.8619	24.6802	24.7606	24.6196	24.6868	24.6288	24.3816	24.6605	24.4708	+	+	PE3_PE1;PE7_PE1	8	8	0	1.01517	0.0424141	-0.122494	-2.16297	1.26536	0.0248932	-0.263241	-2.69669	O43598	DNPH1_HUMAN	DNPH1	5-hydroxymethyl-dUMP N-hydrolase
24.6325	24.6323	24.615	25.5796	25.5824	25.576	25.6233	25.6822	25.6952	+	+	PE3_PE1;PE7_PE1	32	32	0	8.00105	0	0.952682	156.592	5.85432	0.000680851	1.04026	45.4745	O43615	TIM44_HUMAN	TIMM44	Mitochondrial import inner membrane translocase subunit TIM44
24.0537	24.0648	23.9787	23.8886	24.0492	23.9158	23.9143	23.958	23.9245		+	PE7_PE1	10	10	0	0.649835	0.11824	-0.0812537	-1.43747	1.53494	0.0128171	-0.100171	-3.32732	O43617	TPPC3_HUMAN	TRAPPC3	Trafficking protein particle complex subunit 3
24.504	24.4688	24.5543	24.255	24.3901	24.2805	24.341	24.298	24.2263	+	+	PE3_PE1;PE7_PE1	11	11	0	1.847	0.00575198	-0.200504	-4.15319	2.21553	0.00359585	-0.220599	-5.29983	O43633	CHM2A_HUMAN	CHMP2A	Charged multivesicular body protein 2a
20.7022	20.7142	20.7767	20.3743	20.288	20.2654	20.2688	20.0591	20.1018	+	+	PE3_PE1;PE7_PE1	13	13	0	3.32122	0.000181626	-0.421825	-10.4305	3.00591	0.00131162	-0.587807	-8.64093	O43639	NCK2_HUMAN	NCK2	Cytoplasmic protein NCK2
22.82	22.832	22.8747	22.4646	22.4854	22.4681	22.4632	22.5427	22.623	+	+	PE3_PE1;PE7_PE1	25	25	0	4.49933	0	-0.369533	-20.7827	2.43809	0.00266273	-0.299278	-6.10329	O43660	PLRG1_HUMAN	PLRG1	Pleiotropic regulator 1
20.2834	20.2666	20.3438	20.2685	20.1083	20.1454	20.4214	20.3066	20.5343	+		PE3_PE1	15	15	0	1.08246	0.0360491	-0.123873	-2.30255	0.814747	0.07809	0.122849	1.7601	O43663	PRC1_HUMAN	PRC1	Protein regulator of cytokinesis 1
20.924	21.0414	21.0235	21.1661	21.1724	21.2751	21.1874	21.2558	21.2807	+	+	PE3_PE1;PE7_PE1	7	7	0	1.82778	0.00596161	0.208236	4.09886	2.22523	0.00351843	0.244986	5.33293	O43665	RGS10_HUMAN	RGS10	Regulator of G-protein signaling 10
24.885	24.8194	24.8614	24.6529	24.7169	24.6384	24.7319	24.6933	24.6998	+	+	PE3_PE1;PE7_PE1	8	8	0	2.41812	0.00155337	-0.185877	-6.02732	2.53861	0.00233172	-0.146959	-6.49801	O43670	ZN207_HUMAN	ZNF207	BUB3-interacting and GLEBS motif-containing protein ZNF207
24.2443	24.1981	24.2807	23.3055	23.3462	23.3537	23.2438	23.2971	23.2379	+	+	PE3_PE1;PE7_PE1	7	7	0	5.25083	0	-0.905928	-32.1029	5.25817	0.00032	-0.981459	-32.2393	O43674	NDUB5_HUMAN	NDUFB5	NADH dehydrogenase [ubiquinone] 1 beta subcomplex subunit 5
24.5808	24.6916	24.7315	23.1301	22.9505	23.1268	22.9474	22.9894	23.1026	+	+	PE3_PE1;PE7_PE1	4	4	0	4.55453	0	-1.59885	-21.4588	4.85855	0.000198758	-1.65489	-25.5901	O43676	NDUB3_HUMAN	NDUFB3	NADH dehydrogenase [ubiquinone] 1 beta subcomplex subunit 3
22.7145	22.989	23.0376	21.8364	21.7853	22.0231	21.9362	22.0516	21.6873	+	+	PE3_PE1;PE7_PE1	2	2	0	2.94566	0.000496863	-1.0321	-8.33311	2.64569	0.00196292	-1.022	-6.94238	O43677	NDUC1_HUMAN	NDUFC1	NADH dehydrogenase [ubiquinone] 1 subunit C1
24.4514	24.493	24.4951	23.3403	23.2745	23.3745	23.3137	23.4254	23.3526	+	+	PE3_PE1;PE7_PE1	5	5	0	5.41462	0	-1.15004	-35.2867	5.2049	0.000289157	-1.11597	-31.2625	O43678	NDUA2_HUMAN	NDUFA2	NADH dehydrogenase [ubiquinone] 1 alpha subcomplex subunit 2
25.3802	25.3495	25.2622	25.9847	25.9928	26.0533	25.9809	25.9749	26.0338	+	+	PE3_PE1;PE7_PE1	13	13	0	4.09234	0	0.679642	16.4041	4.11847	0.000326784	0.665889	16.6558	O43681	GET3_HUMAN	GET3	ATPase GET3
19.7515	19.8284	20.0772	19.5747	19.7502	19.5346	20.002	19.9482	19.9501	+		PE3_PE1	21	21	0	1.05403	0.0386997	-0.265881	-2.24327	0.334835	0.413713	0.0810604	0.811595	O43683	BUB1_HUMAN	BUB1	Mitotic checkpoint serine/threonine-protein kinase BUB1
24.9983	25.0411	25.0335	24.7305	24.8197	24.7838	24.8085	24.7913	24.8076	+	+	PE3_PE1;PE7_PE1	14	14	0	2.97194	0.000505317	-0.246297	-8.46611	3.99321	0.000405904	-0.221838	-15.4826	O43684	BUB3_HUMAN	BUB3	Mitotic checkpoint protein BUB3
25.0952	25.0114	25.083	25.2116	25.2568	25.1908	25.0865	25.1324	25.1288	+		PE3_PE1	66	46	0	2.06322	0.00337591	0.156521	4.80047	0.812519	0.078568	0.0526803	1.75571	O43707	ACTN4_HUMAN	ACTN4	Alpha-actinin-4
21.2406	21.2051	21.1142	20.4899	20.0608	20.5737	20.4176	20.6174	20.4854	+	+	PE3_PE1;PE7_PE1	7	7	0	2.11729	0.00290759	-0.811865	-4.97337	3.20827	0.00105274	-0.679826	-9.75315	O43708	MAAI_HUMAN	GSTZ1	Maleylacetoacetate isomerase
22.9286	22.8188	22.7454	23.3425	23.4295	23.3662	23.2488	23.2771	23.2876	+	+	PE3_PE1;PE7_PE1	7	7	0	3.12095	0.000304104	0.54845	9.25791	2.89435	0.0013054	0.440241	8.07885	O43709	BUD23_HUMAN	BUD23	18S rRNA (guanine-N(7))-methyltransferase
21.3073	21.321	21.231	21.9405	21.8476	21.977	21.736	21.8425	21.9756	+	+	PE3_PE1;PE7_PE1	6	6	0	3.73869	8.6774e-05	0.635262	13.3409	2.78429	0.00158865	0.56495	7.55686	O43715	TRIA1_HUMAN	TRIAP1	TP53-regulated inhibitor of apoptosis 1
21.2203	20.9978	21.0695	21.4015	21.4667	21.3182	21.5996	21.4065	21.449	+	+	PE3_PE1;PE7_PE1	7	7	0	1.72681	0.00784459	0.299572	3.82124	1.94113	0.00575937	0.38917	4.42664	O43716	GATC_HUMAN	GATC	Glutamyl-tRNA(Gln) amidotransferase subunit C
23.0833	23.0333	23.121	22.7716	22.8083	22.8165	22.8574	22.8651	22.8484	+	+	PE3_PE1;PE7_PE1	31	31	0	3.19976	0.000320708	-0.280401	-9.70383	2.99876	0.00130337	-0.222235	-8.60391	O43719	HTSF1_HUMAN	HTATSF1	17S U2 SnRNP complex component HTATSF1
19.6876	19.5487	19.3938	21.7283	21.7737	21.5416	21.6153	21.7118	21.6373	+	+	PE3_PE1;PE7_PE1	10	10	0	4.37357	0	2.13779	19.3198	4.71348	0.000168717	2.11144	23.529	O43736	ITM2A_HUMAN	ITM2A	Integral membrane protein 2A
19.5523	19.0483	19.4141	19.9289	19.9768	19.8748	19.6436	19.7498	19.8112	+	+	PE3_PE1;PE7_PE1	9	8	0	1.73441	0.00759696	0.588612	3.84169	1.1793	0.0303059	0.396624	2.50832	O43741	AAKB2_HUMAN	PRKAB2	5'-AMP-activated protein kinase subunit beta-2
24.1629	24.077	24.091	23.3915	23.3482	23.3256	23.2759	23.3245	23.3232	+	+	PE3_PE1;PE7_PE1	26	26	0	4.672	0	-0.755179	-22.9706	4.87698	0.000201681	-0.802431	-25.8645	O43747	AP1G1_HUMAN	AP1G1	AP-1 complex subunit gamma-1
21.6005	21.3564	21.5188	20.7254	20.8406	20.6423	20.8033	20.8763	20.5683	+	+	PE3_PE1;PE7_PE1	7	7	0	2.92335	0.000490909	-0.755789	-8.22168	2.49531	0.0024306	-0.742589	-6.32539	O43752	STX6_HUMAN	STX6	Syntaxin-6
17.3846	17.2153	17.0479	18.4706	18.7039	18.4378	18.459	18.5274	18.3952	+	+	PE3_PE1;PE7_PE1	2	2	1	3.3	0.000275718	1.32148	10.3	3.54693	0.000809928	1.24459	11.9191	O43759	SNG1_HUMAN	SYNGR1	Synaptogyrin-1
24.837	24.9088	24.8795	25.7879	25.8401	25.8304	25.9052	25.8527	25.9286	+	+	PE3_PE1;PE7_PE1	6	6	0	5.44474	0	0.944378	35.9055	5.31523	0.000342857	1.0204	33.3193	O43760	SNG2_HUMAN	SYNGR2	Synaptogyrin-2
21.4706	21.2605	21.3416	21.3465	21.1281	21.276	20.9832	21.5156	21.1763				3	3	0	0.53289	0.176077	-0.107358	-1.20921	0.325708	0.433843	-0.132515	-0.792578	O43761	SNG3_HUMAN	SYNGR3	Synaptogyrin-3
24.9049	24.8928	24.9114	25.0074	25.073	25.0092	25.054	25.0678	25.0204	+	+	PE3_PE1;PE7_PE1	13	13	0	2.32835	0.00194372	0.126844	5.6955	3.1754	0.00108963	0.144336	9.56392	O43765	SGTA_HUMAN	SGTA	Small glutamine-rich tetratricopeptide repeat-containing protein alpha
20.3722	19.9735	19.8787	20.5867	20.3312	20.5076	20.4818	20.4279	20.4837	+	+	PE3_PE1;PE7_PE1	8	8	0	1.11403	0.0331447	0.400394	2.36895	1.20249	0.0285261	0.389693	2.55853	O43766	LIAS_HUMAN	LIAS	Lipoyl synthase
24.5119	24.4222	24.4833	24.6045	24.6205	24.5576	24.5595	24.4748	24.5782	+		PE3_PE1	8	7	0	1.69849	0.00839412	0.121708	3.74568	0.718706	0.100906	0.0650107	1.57172	O43768	ENSA_HUMAN	ENSA	Alpha-endosulfine
24.4201	24.3381	24.3634	24.5917	24.5672	24.5258	24.6824	24.7233	24.649	+	+	PE3_PE1;PE7_PE1	14	14	0	2.42814	0.00153267	0.187717	6.06535	3.18215	0.00109403	0.311021	9.60251	O43772	MCAT_HUMAN	SLC25A20	Mitochondrial carnitine/acylcarnitine carrier protein
26.9257	26.9601	26.9796	26.1562	26.1467	26.1663	26.1371	26.1017	26.1431	+	+	PE3_PE1;PE7_PE1	25	25	0	5.93645	0	-0.798738	-47.6796	5.65785	0.000530387	-0.827878	-40.6033	O43776	SYNC_HUMAN	NARS1	Asparagine--tRNA ligase
17.6625	17.8011	17.5385	17.4249	17.6849	17.5094	17.7486	17.4964	17.5316				4	4	0	0.520412	0.183909	-0.127673	-1.18472	0.275959	0.568775	-0.0751858	-0.687225	O43791	SPOP_HUMAN	SPOP	Speckle-type POZ protein
23.664	23.6381	23.6325	23.0562	23.0953	23.1057	22.9882	23.1339	23.109	+	+	PE3_PE1;PE7_PE1	7	7	0	5.20039	0	-0.559136	-31.1811	3.60523	0.000708618	-0.567863	-12.3352	O43805	SSNA1_HUMAN	SSNA1	Microtubule nucleation factor SSNA1
19.3717	19.2522	18.9779	18.9881	18.4206	18.7972	18.8203	18.0298	18.9362	+		PE3_PE1	4	4	0	1.07517	0.03696	-0.46532	-2.28731	0.918536	0.059251	-0.605188	-1.96664	O43808	PM34_HUMAN	SLC25A17	Peroxisomal membrane protein PMP34
24.8186	24.7549	24.8355	24.1544	24.1527	24.1971	24.2241	24.1402	24.1056	+	+	PE3_PE1;PE7_PE1	15	15	0	4.61892	0	-0.634904	-22.2749	3.94724	0.000390417	-0.646367	-15.0726	O43809	CPSF5_HUMAN	NUDT21	Cleavage and polyadenylation specificity factor subunit 5
24.551	24.5489	24.5807	24.2469	24.2473	24.2185	24.2592	24.2432	24.1706	+	+	PE3_PE1;PE7_PE1	13	13	0	4.67632	0	-0.322617	-23.0281	3.49099	0.000850746	-0.335857	-11.5324	O43813	LANC1_HUMAN	LANCL1	Glutathione S-transferase LANCL1
22.5702	22.5002	22.4214	22.0163	21.9884	22.0532	22.0957	22.0587	21.9809	+	+	PE3_PE1;PE7_PE1	32	31	0	3.28258	0.000337824	-0.477983	-10.194	2.93305	0.00133964	-0.452183	-8.26994	O43815	STRN_HUMAN	STRN	Striatin
23.4604	23.485	23.5126	23.7654	23.8047	23.72	23.8294	23.8286	23.8771	+	+	PE3_PE1;PE7_PE1	18	18	0	3.19137	0.000318671	0.27737	9.65544	4.08367	0.000315684	0.35901	16.3214	O43818	U3IP2_HUMAN	RRP9	U3 small nucleolar RNA-interacting protein 2
21.7347	21.6667	21.6731	22.1195	22.0041	22.0393	22.1001	22.1311	22.2392	+	+	PE3_PE1;PE7_PE1	7	7	0	3.06875	0.000392793	0.362832	8.97311	3.21929	0.000993814	0.465316	9.81739	O43819	SCO2_HUMAN	SCO2	Protein SCO2 homolog
20.8343	20.7888	20.58	20.5343	20.5803	20.5566	20.949	20.8088	20.6453	+		PE3_PE1	9	9	0	1.04903	0.0392202	-0.177293	-2.23288	0.221111	0.710673	0.066672	0.566998	O43822	CF410_HUMAN	CFAP410	Cilia- and flagella-associated protein 410
21.9221	21.8728	21.8833	22.0888	22.1627	22.1444	22.1079	22.1788	22.1521	+	+	PE3_PE1;PE7_PE1	21	21	0	3.05883	0.000389808	0.239201	8.91988	3.23826	0.00100364	0.25353	9.92886	O43823	AKAP8_HUMAN	AKAP8	A-kinase anchor protein 8
21.5932	21.3149	21.4036	22.0114	22.0543	21.9836	22.0284	22.0029	22.0506	+	+	PE3_PE1;PE7_PE1	18	18	0	2.62255	0.00102332	0.579173	6.84421	2.67967	0.00178206	0.590048	7.0888	O43824	GTPB6_HUMAN	GTPBP6	Putative GTP-binding protein 6
20.2408	20.66	21.0138	22.0098	22.064	22.0858	21.9184	22.145	21.9305	+	+	PE3_PE1;PE7_PE1	4	4	0	2.4892	0.00143895	1.41499	6.30136	2.35184	0.0031023	1.35976	5.78084	O43826	G6PT1_HUMAN	SLC37A4	Glucose-6-phosphate exchanger SLC37A4
20.1387	18.554	19.9622	18.7255	18.8184	20.0135	19.5389	19.4945	19.8984				3	3	1	0.218956	0.721167	-0.365798	-0.56217	0.0619123	0.939308	0.0922737	0.178322	O43829	ZBT14_HUMAN	ZBTB14	Zinc finger and BTB domain-containing protein 14
25.1951	25.2136	25.2095	25.3207	25.4136	25.2847	25.3805	25.4356	25.4146	+	+	PE3_PE1;PE7_PE1	18	18	0	1.58142	0.0110633	0.133632	3.4432	3.5612	0.000755116	0.204168	12.0197	O43837	IDH3B_HUMAN	IDH3B	Isocitrate dehydrogenase [NAD] subunit beta
25.2908	25.1845	25.2445	25.4007	25.4267	25.3909	25.4252	25.433	25.3611	+	+	PE3_PE1;PE7_PE1	41	41	0	2.15616	0.00262236	0.166117	5.10059	1.91483	0.00608664	0.166479	4.34899	O43847	NRDC_HUMAN	NRDC	Nardilysin
26.3746	26.3803	26.4273	27.445	27.4847	27.4633	27.3712	27.3946	27.3767	+	+	PE3_PE1;PE7_PE1	23	23	0	6.11505	0	1.07028	52.8495	6.16684	0.00104348	0.986769	54.4508	O43852	CALU_HUMAN	CALU	Calumenin
18.8324	19.354	19.0571	19.3003	19.119	19.3857	19.1846	18.9769	19.2934				14	12	0	0.476828	0.217238	0.187122	1.09878	0.147808	0.835922	0.0704206	0.397163	O43861	ATP9B_HUMAN	ATP9B	Probable phospholipid-transporting ATPase IIB
21.3865	21.4374	21.4672	21.1786	21.5081	21.3657	21.5763	21.4502	21.4698				8	8	0	0.334029	0.412251	-0.0795968	-0.809918	0.680079	0.113398	0.0683854	1.49638	O43865	SAHH2_HUMAN	AHCYL1	S-adenosylhomocysteine hydrolase-like protein 1
17.7546	18.9743	19.5919	19.3801	18.8404	19.173	19.0367	19.3641	19.0915				11	11	1	0.2523	0.639081	0.357544	0.635958	0.287043	0.536545	0.390464	0.710968	O43896	KIF1C_HUMAN	KIF1C	Kinesin-like protein KIF1C
20.6231	20.5134	20.6974	19.3632	19.0966	19.2216	19.0398	19.0449	19.2153	+	+	PE3_PE1;PE7_PE1	10	10	0	3.912	0	-1.38416	-14.7655	4.36443	0.000241509	-1.51131	-19.2175	O43903	GAS2_HUMAN	GAS2	Growth arrest-specific protein 2
18.143	19.2137	18.1847	19.1947	19.1903	19.343	19.2903	19.2459	19.1051	+		PE3_PE1	8	8	1	0.96504	0.0478365	0.728879	2.06057	0.922256	0.0587076	0.699973	1.97412	O43909	EXTL3_HUMAN	EXTL3	Exostosin-like 3
22.1715	21.973	21.9695	21.9488	21.9338	21.9243	22.0666	22.1339	22.0568				20	20	0	0.69467	0.103792	-0.102383	-1.52482	0.269298	0.588442	0.047788	0.672874	O43913	ORC5_HUMAN	ORC5	Origin recognition complex subunit 5
25.2398	25.0939	25.1881	24.034	24.0571	23.9976	24.0393	24.0756	24.0116	+	+	PE3_PE1;PE7_PE1	6	6	0	4.8071	0	-1.14441	-24.8395	4.77011	0.000179439	-1.13177	-24.3133	O43920	NDUS5_HUMAN	NDUFS5	NADH dehydrogenase [ubiquinone] iron-sulfur protein 5
22.4957	22.6661	22.3286	22.1331	22.4541	22.3044	22.1407	22.1212	21.9882		+	PE7_PE1	4	4	0	0.673621	0.109687	-0.199608	-1.4838	1.72159	0.00881591	-0.413425	-3.80724	O43924	PDE6D_HUMAN	PDE6D	Retinal rod rhodopsin-sensitive cGMP 3'
21.7381	21.8482	21.7937	21.6603	21.7765	21.6507	21.8094	21.7989	21.6432				12	11	0	0.882848	0.0603381	-0.0974668	-1.89519	0.275672	0.569805	-0.0428524	-0.686606	O43929	ORC4_HUMAN	ORC4	Origin recognition complex subunit 4
22.9814	22.8873	22.9117	22.8319	22.7263	22.8461	23.0646	22.9222	22.9334	+		PE3_PE1	35	35	0	1.2488	0.024	-0.125374	-2.66002	0.362299	0.360706	0.0466309	0.868322	O43933	PEX1_HUMAN	PEX1	Peroxisomal ATPase PEX1
26.6399	16.2462	26.457	26.2482	26.1986	17.687	26.2461	26.4661	17.2406				2	2	3	0.0196714	0.981835	0.263544	0.0590891	0.0146703	0.98555	0.203188	0.0443053	O43934	MFS11_HUMAN	MFSD11	UNC93-like protein MFSD11
23.4235	23.4249	23.4342	23.068	23.0945	23.0262	23.0173	23.0527	23.0244	+	+	PE3_PE1;PE7_PE1	31	29	0	4.2591	0	-0.364624	-18.0763	5.39669	0.000379447	-0.396051	-34.9234	O60216	RAD21_HUMAN	RAD21	Double-strand-break repair protein rad21 homolog
19.656	19.2994	19.2112	20.3659	20.2173	20.1851	20.182	19.8989	20.3894	+	+	PE3_PE1;PE7_PE1	2	1	0	2.38473	0.0016648	0.867227	5.9021	1.75715	0.00820202	0.767909	3.90331	O60218	AK1BA_HUMAN	AKR1B10	Aldo-keto reductase family 1 member B10
24.4503	24.5281	24.6345	24.4874	24.5167	24.4755	24.5877	24.5007	24.4522				4	4	0	0.334875	0.410233	-0.0444622	-0.811678	0.133329	0.85567	-0.0240726	-0.362023	O60220	TIM8A_HUMAN	TIMM8A	Mitochondrial import inner membrane translocase subunit Tim8 A
22.0947	22.0134	22.108	22.4891	22.531	22.5823	22.5412	22.6095	22.5568	+	+	PE3_PE1;PE7_PE1	35	35	0	3.49352	0.000146832	0.462098	11.5496	3.79483	0.000625397	0.497143	13.7872	O60231	DHX16_HUMAN	DHX16	Pre-mRNA-splicing factor ATP-dependent RNA helicase DHX16
24.6121	24.5959	24.6087	25.2468	25.272	25.2279	25.1085	25.2339	25.1843	+	+	PE3_PE1;PE7_PE1	9	9	0	5.91107	0	0.64334	46.987	3.99353	0.000406279	0.569983	15.4855	O60232	ZNRD2_HUMAN	ZNRD2	Protein ZNRD2
25.9074	25.7782	25.811	24.6391	24.7537	24.6759	24.7986	24.8198	24.7862	+	+	PE3_PE1;PE7_PE1	6	5	0	4.61488	0	-1.14264	-22.2227	4.87097	0.000200418	-1.03068	-25.7748	O60234	GMFG_HUMAN	GMFG	Glia maturation factor gamma
21.8233	22.0784	21.8092	22.5578	21.9757	22.2746	22.1594	22.2968	22.254		+	PE7_PE1	13	13	0	0.90054	0.0572562	0.365772	1.93055	1.58549	0.0117128	0.333074	3.45346	O60237	MYPT2_HUMAN	PPP1R12B	Protein phosphatase 1 regulatory subunit 12B
17.4776	17.7466	17.6282	16.9291	17.3155	17.0419	16.5838	16.8472	17.6104	+		PE3_PE1	1	1	0	1.70593	0.00820638	-0.521982	-3.76544	0.885834	0.0644775	-0.603706	-1.90115	O60238	BNI3L_HUMAN	BNIP3L	BCL2/adenovirus E1B 19 kDa protein-interacting protein 3-like
21.7019	21.6332	21.8	21.5088	21.6214	21.6184	21.5372	21.6725	21.647	+		PE3_PE1	33	33	0	0.991551	0.0449029	-0.12885	-2.11456	0.659281	0.120316	-0.0928059	-1.45586	O60244	MED14_HUMAN	MED14	Mediator of RNA polymerase II transcription subunit 14
24.1859	24.1827	24.2274	24.1896	24.231	24.1729	24.3295	24.3444	24.2736		+	PE7_PE1	18	16	0	0.0125731	0.987956	-0.000855128	-0.0380588	1.97321	0.00528086	0.117131	4.52271	O60256	KPRB_HUMAN	PRPSAP2	Phosphoribosyl pyrophosphate synthase-associated protein 2
22.6772	23.0281	22.9049	24.0816	24.1256	24.1702	23.9297	24.0438	24.0259	+	+	PE3_PE1;PE7_PE1	5	5	0	3.53775	0.000151775	1.25575	11.8548	3.31463	0.000855428	1.12973	10.3898	O60262	GBG7_HUMAN	GNG7	Guanine nucleotide-binding protein G(I)/G(S)/G(O) subunit gamma-7
24.1947	24.2268	24.2678	24.2448	24.3022	24.3011	24.2823	24.3111	24.3206		+	PE7_PE1	62	44	0	0.867617	0.0627339	0.0529238	1.86484	1.44587	0.0158507	0.0748851	3.11149	O60264	SMCA5_HUMAN	SMARCA5	SWI/SNF-related matrix-associated actin-dependent regulator of chromatin subfamily A member 5
18.1567	18.2201	18.3997	18.1134	18.1191	17.9414	17.7851	18.0743	17.8843	+	+	PE3_PE1;PE7_PE1	8	8	0	1.0108	0.0427948	-0.200858	-2.15399	1.43257	0.0164405	-0.344265	-3.07993	O60266	ADCY3_HUMAN	ADCY3	Adenylate cyclase type 3
22.2276	22.1776	22.2005	22.4108	22.418	22.3936	22.3316	22.3667	22.3516	+	+	PE3_PE1;PE7_PE1	55	48	0	3.65599	8.21192e-05	0.205536	12.7089	2.95391	0.00135596	0.148069	8.37467	O60271	JIP4_HUMAN	SPAG9	C-Jun-amino-terminal kinase-interacting protein 4
21.9572	21.948	21.9012	21.8255	21.8287	21.7598	21.8414	21.8481	21.8148	+	+	PE3_PE1;PE7_PE1	71	71	0	2.00217	0.00382393	-0.130811	-4.61074	2.12844	0.00412807	-0.100699	-5.0096	O60287	NPA1P_HUMAN	URB1	Nucleolar pre-ribosomal-associated protein 1
19.4595	19.0292	19.0618	19.4222	19.3899	19.3285	19.1616	19.0575	19.3816				9	7	0	0.628031	0.127525	0.196712	1.395	0.0336099	0.967117	0.0167249	0.099499	O60291	MGRN1_HUMAN	MGRN1	E3 ubiquitin-protein ligase MGRN1
21.0177	20.6634	20.7155	20.2644	20.0935	19.9819	20.2224	20.1554	20.1085	+	+	PE3_PE1;PE7_PE1	28	28	0	2.11965	0.00290919	-0.685638	-4.98102	2.28015	0.00327428	-0.636784	-5.52366	O60293	ZC3H1_HUMAN	ZFC3H1	Zinc finger C3H1 domain-containing protein
19.4992	19.4382	19.1494	18.4078	18.6679	18.7242	18.7073	18.7207	18.6914	+	+	PE3_PE1;PE7_PE1	12	12	0	2.19881	0.00248766	-0.762249	-5.2431	2.42663	0.00265142	-0.655783	-6.05961	O60294	TYW4_HUMAN	LCMT2	tRNA wybutosine-synthesizing protein 4
24.4345	24.5247	24.4951	24.3356	24.3366	24.3334	24.3291	24.3896	24.3606	+	+	PE3_PE1;PE7_PE1	57	56	0	2.30963	0.0019916	-0.149544	-5.62826	1.76777	0.00797524	-0.124998	-3.93232	O60306	AQR_HUMAN	AQR	RNA helicase aquarius
22.4961	22.4754	22.4032	22.5707	22.5696	22.4647	22.5806	22.5434	22.4758				22	19	0	0.786612	0.0784915	0.0767606	1.70471	0.835768	0.0736774	0.075009	1.80164	O60307	MAST3_HUMAN	MAST3	Microtubule-associated serine/threonine-protein kinase 3
17.2163	17.3223	17.2429	17.8081	17.9179	18.2391	17.3956	17.8788	17.5606	+	+	PE3_PE1;PE7_PE1	10	10	0	2.26338	0.00216191	0.72787	5.46483	1.13647	0.0338002	0.351161	2.41656	O60308	CE104_HUMAN	CEP104	Centrosomal protein of 104 kDa
22.9435	22.9249	22.8787	23.4211	23.504	23.4255	23.4796	23.4837	23.4621	+	+	PE3_PE1;PE7_PE1	53	53	0	4.06418	0	0.534491	16.1371	4.98074	0.000223256	0.559402	27.4642	O60313	OPA1_HUMAN	OPA1	Dynamin-like GTPase OPA1
22.6647	22.4774	22.6598	22.9091	22.8987	22.8191	22.8882	22.8603	22.9271	+	+	PE3_PE1;PE7_PE1	30	30	0	1.81103	0.00632053	0.27501	4.05191	1.96837	0.0053344	0.29124	4.50811	O60318	GANP_HUMAN	MCM3AP	Germinal-center associated nuclear protein
21.4043	21.5409	21.4556	21.426	21.6886	21.5364	21.616	21.774	21.6391		+	PE7_PE1	8	4	0	0.412907	0.281471	0.0834306	0.971188	1.52647	0.0130744	0.209485	3.30645	O60331	PI51C_HUMAN	PIP5K1C	Phosphatidylinositol 4-phosphate 5-kinase type-1 gamma
22.0052	21.7494	21.8318	22.4356	22.5775	22.5309	22.4174	22.402	22.4389	+	+	PE3_PE1;PE7_PE1	42	30	0	2.78777	0.000798456	0.6525	7.5729	2.7325	0.00170838	0.557298	7.32186	O60333	KIF1B_HUMAN	KIF1B	Kinesin-like protein KIF1B
19.233	18.8583	18.5366	19.8243	19.8692	19.8589	19.9291	19.7351	19.7746	+	+	PE3_PE1;PE7_PE1	27	27	0	2.0738	0.00326918	0.974909	4.83393	1.95481	0.00548857	0.937035	4.46742	O60336	MABP1_HUMAN	MAPKBP1	Mitogen-activated protein kinase-binding protein 1
19.7879	19.5249	19.7997	19.4632	18.631	19.1792	19.6777	19.3022	19.617	+		PE3_PE1	6	6	0	1.10798	0.0337412	-0.613078	-2.3562	0.512819	0.194597	-0.171895	-1.1698	O60337	MARH6_HUMAN	MARCHF6	E3 ubiquitin-protein ligase MARCHF6
22.5898	22.6589	22.6731	22.6115	22.5835	22.5419	22.5952	22.6142	22.6202				28	28	0	0.877713	0.0611778	-0.0616582	-1.88495	0.500953	0.202886	-0.030728	-1.14643	O60341	KDM1A_HUMAN	KDM1A	Lysine-specific histone demethylase 1A
19.3769	19.1844	19.2466	18.335	18.3594	18.3213	18.131	18.2039	18.2731	+	+	PE3_PE1;PE7_PE1	10	10	0	4.06034	0	-0.930717	-16.1009	3.96574	0.000397471	-1.06659	-15.2363	O60353	FZD6_HUMAN	FZD6	Frizzled-6
24.5235	24.5363	24.4105	24.8347	24.9191	24.8204	24.3871	24.5531	24.4139	+		PE3_PE1	1	1	0	2.72617	0.000904335	0.36796	7.29358	0.233601	0.682457	-0.0387433	-0.594815	O60361	NDK8_HUMAN	NME2P1	Putative nucleoside diphosphate kinase
22.4669	22.356	22.4465	21.9506	21.9917	21.9815	22.0292	22.0274	21.9919	+	+	PE3_PE1;PE7_PE1	45	45	0	3.6106	7.90312e-05	-0.448562	-12.3742	3.44932	0.0008236	-0.406993	-11.2522	O60449	LY75_HUMAN	LY75	Lymphocyte antigen 75
21.4524	21.4026	21.4873	21.6763	21.5943	21.6166	21.7482	21.6861	21.8102	+	+	PE3_PE1;PE7_PE1	14	14	0	2.19637	0.00248624	0.181623	5.23487	2.64049	0.00200072	0.300743	6.9202	O60476	MA1A2_HUMAN	MAN1A2	Mannosyl-oligosaccharide 1
21.8193	21.6539	21.8597	21.5815	21.5146	21.6438	21.7388	21.6111	21.6246	+		PE3_PE1	38	38	0	1.26735	0.0228834	-0.197639	-2.70112	0.731101	0.0976475	-0.119467	-1.59593	O60486	PLXC1_HUMAN	PLXNC1	Plexin-C1
24.6366	24.5386	24.6018	24.7486	24.7574	24.7508	24.7078	24.6798	24.6141	+		PE3_PE1	35	33	0	2.28897	0.00200596	0.159941	5.55476	0.873625	0.0669163	0.074913	1.8768	O60488	ACSL4_HUMAN	ACSL4	Long-chain-fatty-acid--CoA ligase 4
24.6941	24.6577	24.696	24.5987	24.608	24.5909	24.654	24.6994	24.6619	+		PE3_PE1	10	8	0	2.46804	0.00142311	-0.083416	-6.2187	0.225383	0.700587	-0.0108134	-0.576545	O60493	SNX3_HUMAN	SNX3	Sorting nexin-3
19.9938	19.6592	19.7792	20.5876	20.3902	20.359	20.6229	20.4112	20.4573	+	+	PE3_PE1;PE7_PE1	6	6	0	2.19667	0.00248695	0.634839	5.23586	2.37396	0.00309755	0.686387	5.86216	O60499	STX10_HUMAN	STX10	Syntaxin-10
22.2857	22.2139	22.2276	22.0947	22.1723	22.0837	22.106	22.0896	22.0565	+	+	PE3_PE1;PE7_PE1	33	33	0	1.61591	0.0101006	-0.125472	-3.53071	2.40983	0.00278289	-0.15833	-5.99602	O60502	OGA_HUMAN	OGA	Protein O-GlcNAcase
26.3572	26.3594	26.3138	26.3412	26.42	26.3404	26.3414	26.3729	26.3962				24	24	0	0.32129	0.442296	0.0237122	0.78334	0.542581	0.175798	0.0266933	1.22821	O60506	HNRPQ_HUMAN	SYNCRIP	Heterogeneous nuclear ribonucleoprotein Q
22.468	22.3134	22.3566	22.1211	22.1029	22.1155	21.9692	22.1073	22.0926	+	+	PE3_PE1;PE7_PE1	25	25	0	2.34143	0.00189288	-0.266177	-5.7429	2.15089	0.00407734	-0.322975	-5.08318	O60508	PRP17_HUMAN	CDC40	Pre-mRNA-processing factor 17
24.8979	24.8252	24.9508	24.8699	24.8079	24.932	25.0525	25.114	25.0794		+	PE7_PE1	12	12	0	0.156747	0.828438	-0.0213776	-0.418564	2.03295	0.00480811	0.190659	4.70568	O60512	B4GT3_HUMAN	B4GALT3	Beta-1
18.761	18.104	18.5079	20.097	19.8083	20.0921	20.1438	20.2371	20.1572	+	+	PE3_PE1;PE7_PE1	10	10	0	2.70738	0.000987071	1.54149	7.21022	3.05458	0.00115439	1.72176	8.89721	O60513	B4GT4_HUMAN	B4GALT4	Beta-1
19.8689	19.7879	19.4123	21.2921	21.2059	21.1718	21.0948	21.4004	21.363	+	+	PE3_PE1;PE7_PE1	31	31	0	3.34302	0.000183761	1.53356	10.5662	3.14052	0.00116765	1.59639	9.36681	O60518	RNBP6_HUMAN	RANBP6	Ran-binding protein 6
22.6728	22.4742	22.6179	22.5345	22.5321	22.482	22.5772	22.5039	22.4589				20	20	0	0.512662	0.188934	-0.0721035	-1.16949	0.474519	0.223101	-0.0749772	-1.0942	O60524	NEMF_HUMAN	NEMF	Ribosome quality control complex subunit NEMF
23.4156	23.4004	23.407	23.2051	23.2622	23.2602	23.2641	23.3441	23.2372	+	+	PE3_PE1;PE7_PE1	17	17	0	2.99584	0.000416344	-0.165174	-8.58877	1.75038	0.00830142	-0.125837	-3.88491	O60547	GMDS_HUMAN	GMDS	GDP-mannose 4
21.8473	21.9598	21.9018	20.457	20.6615	20.3938	20.7573	20.5674	20.3894	+	+	PE3_PE1;PE7_PE1	7	7	0	4.05671	0	-1.39884	-16.0669	3.55659	0.000814717	-1.33157	-11.9871	O60551	NMT2_HUMAN	NMT2	Glycylpeptide N-tetradecanoyltransferase 2
21.9476	21.9455	21.7911	21.8974	21.9114	21.8894	21.9045	21.9702	21.8935				22	21	0	0.0298214	0.971893	0.00462786	0.0886272	0.187046	0.775831	0.0279477	0.489588	O60563	CCNT1_HUMAN	CCNT1	Cyclin-T1
22.9298	22.9935	22.9619	23.117	22.979	23.0734	23.0586	23.1215	23.2206	+	+	PE3_PE1;PE7_PE1	37	37	0	0.994315	0.04438	0.094703	2.12021	1.56231	0.0121251	0.171815	3.39528	O60566	BUB1B_HUMAN	BUB1B	Mitotic checkpoint serine/threonine-protein kinase BUB1 beta
23.7137	23.7524	23.7732	24.2332	24.3003	24.2193	24.2111	24.2699	24.1851	+	+	PE3_PE1;PE7_PE1	33	33	0	4.10681	0	0.504483	16.543	4.00318	0.000410448	0.475601	15.573	O60568	PLOD3_HUMAN	PLOD3	Multifunctional procollagen lysine hydroxylase and glycosyltransferase LH3
21.8081	21.6688	21.6456	22.1251	21.9895	22.0628	21.9842	22.1447	22.1775	+	+	PE3_PE1;PE7_PE1	13	13	0	2.26844	0.00210041	0.351624	5.48252	2.13594	0.00411239	0.394595	5.03409	O60573	IF4E2_HUMAN	EIF4E2	Eukaryotic translation initiation factor 4E type 2
18.9695	18.6778	18.9569	19.0419	18.6595	18.6099	19.1373	18.9585	18.6985				7	7	0	0.229908	0.696381	-0.0976206	-0.58662	0.148472	0.835047	0.0634181	0.398759	O60583	CCNT2_HUMAN	CCNT2	Cyclin-T2
23.72	23.715	23.7062	23.6563	23.7263	23.7042	23.6487	23.7003	23.674		+	PE7_PE1	55	54	0	0.358651	0.362621	-0.018137	-0.860827	1.19878	0.0285626	-0.0393804	-2.55048	O60610	DIAP1_HUMAN	DIAPH1	Protein diaphanous homolog 1
22.0375	22.2128	22.1348	21.5348	21.425	21.5134	21.7391	21.6841	22.0016	+	+	PE3_PE1;PE7_PE1	4	4	0	3.32875	0.000182397	-0.63733	-10.4772	1.35609	0.0196786	-0.3201	-2.90163	O60613	SEP15_HUMAN	SELENOF	Selenoprotein F
21.5127	21.4286	21.1646	21.8814	21.7808	21.538	21.7488	21.3123	21.4645	+		PE3_PE1	3	3	0	1.1729	0.0285425	0.36476	2.49453	0.351309	0.380293	0.139872	0.845707	O60637	TSN3_HUMAN	TSPAN3	Tetraspanin-3
22.0301	21.9967	22.0037	21.7051	21.5705	21.6511	21.6821	21.5743	21.655	+	+	PE3_PE1;PE7_PE1	28	28	0	3.09342	0.000342069	-0.367984	-9.10669	3.4108	0.000917496	-0.373045	-10.9989	O60645	EXOC3_HUMAN	EXOC3	Exocyst complex component 3
17.7719	17.7731	17.6411	17.7526	17.7638	17.9829	17.9377	17.6987	17.6212				7	7	0	0.52921	0.178359	0.10436	1.202	0.0800932	0.91754	0.0237897	0.226956	O60658	PDE8A_HUMAN	PDE8A	High affinity cAMP-specific and IBMX-insensitive 3'
24.1948	24.258	24.3165	23.4804	23.4754	23.4353	23.2708	23.3097	23.3819	+	+	PE3_PE1;PE7_PE1	24	24	0	4.50871	0	-0.792729	-20.8961	4.39241	0.000246787	-0.935619	-19.5323	O60664	PLIN3_HUMAN	PLIN3	Perilipin-3
20.807	20.5368	20.5882	19.3347	19.1639	19.6157	19.1748	19.5191	19.3937	+	+	PE3_PE1;PE7_PE1	5	5	0	2.9147	0.000487885	-1.2726	-8.17883	3.22182	0.000995868	-1.28147	-9.83217	O60669	MOT2_HUMAN	SLC16A7	Monocarboxylate transporter 2
22.5424	22.573	22.5709	22.7357	22.7384	22.7443	22.9108	22.8384	22.8235	+	+	PE3_PE1;PE7_PE1	11	11	0	4.19323	0	0.177361	17.3968	3.29768	0.000915584	0.295471	10.2858	O60671	RAD1_HUMAN	RAD1	Cell cycle checkpoint protein RAD1
21.7379	21.3314	21.3516	21.5275	21.6658	21.8206	22.2505	20.9553	21.4846				2	2	0	0.55834	0.160749	0.197709	1.25905	0.0795317	0.918261	0.0898584	0.225475	O60675	MAFK_HUMAN	MAFK	Transcription factor MafK
24.867	24.7128	24.6501	24.5703	24.5425	24.5723	24.6384	24.5656	24.4894	+	+	PE3_PE1;PE7_PE1	14	14	0	1.30536	0.0208863	-0.181581	-2.7862	1.08465	0.0380174	-0.178784	-2.30713	O60678	ANM3_HUMAN	PRMT3	Protein arginine N-methyltransferase 3
19.5439	19.7771	19.6771	19.6108	19.7145	19.8159	19.9391	19.8254	19.7436				8	8	0	0.205388	0.748557	0.0477346	0.531563	0.89934	0.062487	0.17001	1.92815	O60683	PEX10_HUMAN	PEX10	Peroxisome biogenesis factor 10
22.7861	22.9062	22.9214	23.2233	23.1832	23.3174	23.2536	23.1582	23.1717	+	+	PE3_PE1;PE7_PE1	12	7	0	2.49782	0.00144796	0.370075	6.33532	2.46314	0.00250364	0.323254	6.1997	O60684	IMA7_HUMAN	KPNA6	Importin subunit alpha-7
23.2091	23.1789	23.1109	23.293	23.3122	23.3018	23.2604	23.3003	23.2848	+	+	PE3_PE1;PE7_PE1	24	24	0	1.99889	0.00384328	0.136016	4.6007	1.67915	0.00973975	0.115522	3.69462	O60701	UGDH_HUMAN	UGDH	UDP-glucose 6-dehydrogenase
23.758	23.7002	23.6647	23.6432	23.7509	23.6631	23.453	23.4167	23.5014		+	PE7_PE1	9	8	0	0.196908	0.765009	-0.0219358	-0.512247	2.62253	0.00202874	-0.250621	-6.84412	O60704	TPST2_HUMAN	TPST2	Protein-tyrosine sulfotransferase 2
23.5921	23.7157	23.81	22.7314	22.559	22.6879	22.7198	22.5654	22.7008	+	+	PE3_PE1;PE7_PE1	10	10	0	3.67108	8.2777e-05	-1.04655	-12.822	3.70834	0.000672566	-1.04396	-13.1055	O60711	LPXN_HUMAN	LPXN	Leupaxin
18.9256	18.7164	18.4634	19.3659	19.2867	19.2947	19.3069	19.503	19.511	+	+	PE3_PE1;PE7_PE1	5	5	0	1.97055	0.00404486	0.613974	4.51468	2.10806	0.0042672	0.73849	4.9435	O60725	ICMT_HUMAN	ICMT	Protein-S-isoprenylcysteine O-methyltransferase
21.6903	21.8351	21.7312	23.8144	23.8285	23.7308	23.7288	23.8711	23.7451	+	+	PE3_PE1;PE7_PE1	11	10	0	5.57114	0	2.03904	38.6222	5.27688	0.000323232	2.02952	32.5894	O60732	MAGC1_HUMAN	MAGEC1	Melanoma-associated antigen C1
24.3496	24.3644	24.3634	24.4617	24.4704	24.4922	24.5225	24.5001	24.5124	+	+	PE3_PE1;PE7_PE1	24	22	0	3.45571	0.000142611	0.115617	11.2947	4.34383	0.000235294	0.152542	18.9888	O60749	SNX2_HUMAN	SNX2	Sorting nexin-2
21.3214	21.1031	21.0066	21.8687	21.976	21.7037	21.806	21.9054	22.0836	+	+	PE3_PE1;PE7_PE1	9	9	0	2.34989	0.00184042	0.705773	5.7737	2.50832	0.00240925	0.787977	6.37686	O60759	CYTIP_HUMAN	CYTIP	Cytohesin-interacting protein
24.5225	24.5257	24.5186	24.8763	24.9112	24.8888	24.9176	24.8994	24.8667	+	+	PE3_PE1;PE7_PE1	16	16	0	5.42357	0	0.369826	35.4695	4.80244	0.000188605	0.372248	24.7726	O60762	DPM1_HUMAN	DPM1	Dolichol-phosphate mannosyltransferase subunit 1
25.3517	25.3569	25.3546	25.2229	25.2425	25.226	25.2624	25.2948	25.2701	+	+	PE3_PE1;PE7_PE1	45	45	0	4.41292	0	-0.123934	-19.7662	2.86734	0.00137778	-0.0785999	-7.9478	O60763	USO1_HUMAN	USO1	General vesicular transport factor p115
21.9921	22.1594	22.1075	22.4858	22.5495	22.3869	22.5382	22.2845	22.4563	+	+	PE3_PE1;PE7_PE1	3	3	0	2.32056	0.00196747	0.387747	5.66744	1.7165	0.00906318	0.339985	3.79362	O60783	RT14_HUMAN	MRPS14	Small ribosomal subunit protein uS14m
19.7176	19.8051	19.6818	20.5289	20.7022	20.6649	20.5656	20.6856	20.4596	+	+	PE3_PE1;PE7_PE1	11	11	0	3.81934	9.24683e-05	0.897156	13.9865	3.4357	0.000871122	0.835412	11.162	O60784	TOM1_HUMAN	TOM1	Target of Myb1 membrane trafficking protein
23.9975	23.9417	24.0156	23.9488	23.9547	23.8604	24.0049	24.0169	23.974				30	23	0	0.777069	0.0808751	-0.0636317	-1.68596	0.205667	0.741321	0.0136547	0.532195	O60825	F262_HUMAN	PFKFB2	6-phosphofructo-2-kinase/fructose-2
21.7296	21.6407	21.6506	21.6048	21.6657	21.6229	21.6392	21.6697	21.6396				30	29	0	0.564154	0.157891	-0.0424798	-1.27042	0.332545	0.418302	-0.0241152	-0.806831	O60826	CCD22_HUMAN	CCDC22	Coiled-coil domain-containing protein 22
22.8723	22.8497	22.8394	22.5868	22.5312	22.5151	22.6157	22.6754	22.6381	+	+	PE3_PE1;PE7_PE1	9	9	0	3.69559	8.42964e-05	-0.309397	-13.0078	3.34522	0.000874025	-0.210727	-10.58	O60828	PQBP1_HUMAN	PQBP1	Polyglutamine-binding protein 1
17.6027	18.8241	18.685	16.8768	17.8954	17.2235	17.5242	17.0836	17.6773	+	+	PE3_PE1;PE7_PE1	2	2	1	0.997738	0.0440936	-1.03871	-2.12722	1.04117	0.0426361	-0.942248	-2.2166	O60829	PAGE4_HUMAN	PAGE4	P antigen family member 4
22.6521	22.5874	22.6469	22.4963	22.6657	22.584	22.682	22.7039	22.9098				4	4	0	0.368436	0.346257	-0.046814	-0.880905	0.838759	0.0729426	0.136438	1.80756	O60830	TI17B_HUMAN	TIMM17B	Mitochondrial import inner membrane translocase subunit Tim17-B
25.2075	25.2093	25.2021	25.1956	25.1728	25.195	25.1863	25.2216	25.2399	+		PE3_PE1	33	33	0	1.11951	0.0326626	-0.0185343	-2.38056	0.238641	0.670265	0.00961367	0.605963	O60832	DKC1_HUMAN	DKC1	H/ACA ribonucleoprotein complex subunit DKC1
24.2661	24.2163	24.2135	24.3673	24.4301	24.3939	24.3242	24.3456	24.3919	+	+	PE3_PE1;PE7_PE1	60	59	0	2.5675	0.00117864	0.165144	6.61544	2.01137	0.00503752	0.121933	4.63896	O60841	IF2P_HUMAN	EIF5B	Eukaryotic translation initiation factor 5B
25.8777	25.9521	25.8768	25.5518	25.5968	25.5068	25.5816	25.569	25.5547	+	+	PE3_PE1;PE7_PE1	13	13	0	3.20365	0.000321499	-0.350395	-9.72632	3.66358	0.000740529	-0.333766	-12.7656	O60869	EDF1_HUMAN	EDF1	Endothelial differentiation-related factor 1
24.7965	24.9509	24.8969	24.8715	24.7793	24.8148	24.8321	24.7795	24.7195				15	15	0	0.493841	0.20268	-0.0595945	-1.13241	0.871702	0.0672214	-0.104406	-1.87297	O60870	KIN17_HUMAN	KIN	DNA/RNA-binding protein KIN17
17.7424	17.8045	17.688	17.8686	18.1526	17.7742	17.9536	17.8102	17.9155		+	PE7_PE1	12	12	0	0.720572	0.0960379	0.18682	1.57536	1.27468	0.0244029	0.148151	2.71742	O60879	DIAP2_HUMAN	DIAPH2	Protein diaphanous homolog 2
24.0804	24.1465	24.1373	23.3766	23.4667	23.4778	23.4227	23.4615	23.4795	+	+	PE3_PE1;PE7_PE1	15	15	0	4.23831	0	-0.681013	-17.8591	4.82232	0.000193939	-0.66683	-25.0593	O60884	DNJA2_HUMAN	DNAJA2	DnaJ homolog subfamily A member 2
22.9836	22.9868	23.0862	23.2141	23.207	23.2051	23.1629	23.2115	23.1845	+	+	PE3_PE1;PE7_PE1	31	23	0	2.30728	0.001991	0.189821	5.61987	1.99489	0.00521697	0.167404	4.5885	O60885	BRD4_HUMAN	BRD4	Bromodomain-containing protein 4
25.5122	25.3734	25.3903	25.597	25.6027	25.7027	25.4167	25.5849	25.6475	+		PE3_PE1	5	5	0	1.70235	0.00827073	0.208794	3.75591	0.694522	0.108686	0.124418	1.52453	O60888	CUTA_HUMAN	CUTA	Protein CutA
21.9339	21.4222	21.3896	21.3551	21.3214	20.9625	21.4146	20.8168	21.3496				5	5	0	0.786456	0.078478	-0.368898	-1.7044	0.682408	0.112637	-0.388275	-1.50092	O60906	NSMA_HUMAN	SMPD2	Sphingomyelin phosphodiesterase 2
18.882	18.6484	19.1392	18.116	17.7381	18.0679	17.9606	18.2234	17.8724	+	+	PE3_PE1;PE7_PE1	7	6	0	2.1109	0.0029348	-0.915862	-4.95269	2.10419	0.00425876	-0.871033	-4.93102	O60907	TBL1X_HUMAN	TBL1X	F-box-like/WD repeat-containing protein TBL1X
18.1017	17.6798	18.1381	17.1916	16.6977	16.252	17.2054	17.3424	16.9838	+	+	PE3_PE1;PE7_PE1	2	2	0	1.82116	0.00608243	-1.25942	-4.08027	1.93625	0.00580248	-0.796001	-4.41215	O60911	CATL2_HUMAN	CTSV	Cathepsin L2
21.855	22.0504	21.9817	22.2166	22.0642	22.2686	22.3213	22.3899	22.3183	+	+	PE3_PE1;PE7_PE1	10	10	0	1.23619	0.0245659	0.22076	2.63222	2.45322	0.00257199	0.380822	6.16137	O60921	HUS1_HUMAN	HUS1	Checkpoint protein HUS1
24.8368	24.7579	24.7591	24.8477	24.8227	24.7362	24.6904	24.8758	24.6659				8	8	0	0.154059	0.831801	0.017594	0.412149	0.222378	0.707532	-0.040589	-0.569834	O60925	PFD1_HUMAN	PFDN1	Prefoldin subunit 1
19.9206	20.5402	20.4407	20.9857	21.0544	21.1615	20.6435	20.8955	20.8066	+	+	PE3_PE1;PE7_PE1	4	4	0	1.74008	0.00748071	0.766733	3.85699	1.09999	0.0366113	0.481385	2.33935	O60927	PP1RB_HUMAN	PPP1R11	E3 ubiquitin-protein ligase PPP1R11
22.3246	22.4915	22.4719	22.5158	22.3847	22.5041	22.1693	22.3157	21.8505		+	PE7_PE1	8	8	0	0.225925	0.705383	0.0388749	0.577754	1.01305	0.0457099	-0.317486	-2.1586	O60930	RNH1_HUMAN	RNASEH1	Ribonuclease H1
21.6753	21.6217	21.6021	21.2414	21.2526	21.1853	21.2397	21.2633	21.2684	+	+	PE3_PE1;PE7_PE1	31	31	0	3.75391	8.78187e-05	-0.406631	-13.4605	4.04144	0.000424301	-0.375895	-15.9244	O60934	NBN_HUMAN	NBN	Nibrin
22.1872	22.1657	22.0109	21.2577	21.1995	21.2232	21.2569	21.2523	21.3193	+	+	PE3_PE1;PE7_PE1	5	5	0	3.9847	0	-0.894412	-15.4059	3.84292	0.000362438	-0.845118	-14.1808	O60936	NOL3_HUMAN	NOL3	Nucleolar protein 3
22.5227	22.5462	22.4826	22.3663	22.2122	22.367	22.4359	22.3251	22.4107	+	+	PE3_PE1;PE7_PE1	23	23	0	1.67743	0.00886727	-0.201998	-3.69011	1.52441	0.0131722	-0.126586	-3.30139	O60942	MCE1_HUMAN	RNGTT	mRNA-capping enzyme
21.6209	21.5726	21.6593	22.0881	21.993	21.9918	22.054	22.1313	21.907	+	+	PE3_PE1;PE7_PE1	16	16	0	3.25364	0.000331807	0.40666	10.0201	2.37589	0.00306302	0.413172	5.8693	O75027	ABCB7_HUMAN	ABCB7	Iron-sulfur clusters transporter ABCB7
21.0652	21.0511	21.0586	21.5408	21.6308	21.5518	21.483	21.6303	21.573	+	+	PE3_PE1;PE7_PE1	29	26	0	4.25442	0	0.516137	18.0272	3.51612	0.000787802	0.50379	11.7046	O75037	KI21B_HUMAN	KIF21B	Kinesin-like protein KIF21B
21.8518	21.8531	21.8363	22.1202	22.2133	22.2731	22.1893	22.1879	22.1474	+	+	PE3_PE1;PE7_PE1	44	25	0	2.86215	0.000654108	0.355118	7.92289	4.61393	0.000152623	0.327807	22.2105	O75044	SRGP2_HUMAN	SRGAP2	SLIT-ROBO Rho GTPase-activating protein 2
19.6763	19.1848	19.6272	20.0948	19.961	20.2102	20.3388	20.0384	20.2923	+	+	PE3_PE1;PE7_PE1	9	9	0	1.58143	0.0110658	0.592573	3.44323	1.79004	0.00769093	0.727088	3.99357	O75052	CAPON_HUMAN	NOS1AP	Carboxyl-terminal PDZ ligand of neuronal nitric oxide synthase protein
20.7163	20.9094	20.8195	20.1923	20.2998	20.1723	20.4134	20.2291	20.2995	+	+	PE3_PE1;PE7_PE1	9	9	0	3.01295	0.000378144	-0.593591	-8.67759	2.53201	0.0023197	-0.501064	-6.47145	O75063	XYLK_HUMAN	FAM20B	Glycosaminoglycan xylosylkinase
20.5294	20.3992	20.3231	19.857	19.7515	19.9075	19.8315	19.8633	19.8982	+	+	PE3_PE1;PE7_PE1	16	16	0	2.80172	0.000804669	-0.57858	-7.63745	3.02601	0.00127164	-0.552932	-8.74595	O75064	DEN4B_HUMAN	DENND4B	DENN domain-containing protein 4B
17.9635	17.365	17.6129	18.2575	18.2448	18.3735	18.3562	18.3683	18.4452	+	+	PE3_PE1;PE7_PE1	7	7	0	1.64849	0.00942346	0.644802	3.61457	1.87173	0.00649731	0.742749	4.22385	O75072	FKTN_HUMAN	FKTN	Ribitol-5-phosphate transferase FKTN
25.5484	25.5003	25.4875	25.3293	25.3672	25.2781	25.3506	25.4009	25.378	+	+	PE3_PE1;PE7_PE1	30	30	0	2.38209	0.00166273	-0.187221	-5.89227	2.34594	0.00312449	-0.135568	-5.75932	O75083	WDR1_HUMAN	WDR1	WD repeat-containing protein 1
22.526	22.5123	22.4164	21.6502	21.3901	21.6753	21.5002	21.5265	21.4135	+	+	PE3_PE1;PE7_PE1	22	22	0	3.14041	0.000307983	-0.913036	-9.36622	4.49343	0.000136364	-1.00483	-20.7117	O75113	N4BP1_HUMAN	N4BP1	NEDD4-binding protein 1
22.5414	22.5358	22.4723	22.6472	22.6048	22.6881	22.736	22.7461	22.6713	+	+	PE3_PE1;PE7_PE1	42	42	0	1.78586	0.00672264	0.130185	3.98202	2.47353	0.00247568	0.201298	6.24008	O75116	ROCK2_HUMAN	ROCK2	Rho-associated protein kinase 2
27.1678	26.9707	27.1326	27.856	27.8417	27.8504	27.9459	27.9021	27.8712	+	+	PE3_PE1;PE7_PE1	46	46	0	3.62513	8.01034e-05	0.75901	12.4805	3.65035	0.000733711	0.816018	12.6668	O75122	CLAP2_HUMAN	CLASP2	CLIP-associating protein 2
20.502	20.6168	20.4098	21.3479	21.3238	21.2911	21.1915	21.2446	21.3169	+	+	PE3_PE1;PE7_PE1	23	23	0	3.70328	8.47573e-05	0.811433	13.0667	3.34605	0.000875	0.741472	10.5852	O75127	PTCD1_HUMAN	PTCD1	Pentatricopeptide repeat-containing protein 1
24.8351	24.876	24.8177	24.7271	24.7691	24.738	24.7349	24.7728	24.7331	+	+	PE3_PE1;PE7_PE1	22	21	0	1.9961	0.00386965	-0.0981763	-4.59218	1.94809	0.00556609	-0.0959924	-4.44737	O75131	CPNE3_HUMAN	CPNE3	Copine-3
19.416	19.7341	19.836	19.4451	19.2302	19.3188	19.3311	19.0527	19.3415	+	+	PE3_PE1;PE7_PE1	9	9	0	1.10277	0.0342553	-0.330701	-2.34521	1.2494	0.0256603	-0.420324	-2.66134	O75140	DEPD5_HUMAN	DEPDC5	GATOR1 complex protein DEPDC5
21.1691	20.9231	21.0986	20.7638	20.717	20.6376	20.8336	20.8405	20.76	+	+	PE3_PE1;PE7_PE1	14	14	0	1.92047	0.00479227	-0.357434	-4.36556	1.50484	0.0136699	-0.252222	-3.25348	O75143	ATG13_HUMAN	ATG13	Autophagy-related protein 13
18.8054	18.8268	18.6388	18.7425	18.7755	18.6706	18.8015	18.7956	19.061				10	10	0	0.152973	0.833078	-0.0274442	-0.409554	0.53851	0.178005	0.129064	1.22023	O75145	LIPA3_HUMAN	PPFIA3	Liprin-alpha-3
25.2586	25.1108	25.1689	24.9836	24.9182	24.9436	24.9892	25.019	24.9302	+	+	PE3_PE1;PE7_PE1	59	56	0	2.098	0.00301724	-0.230979	-4.91114	1.78359	0.00781402	-0.199988	-3.97575	O75146	HIP1R_HUMAN	HIP1R	Huntingtin-interacting protein 1-related protein
22.3894	22.3447	22.4143	22.1014	22.1468	22.1491	22.1684	22.2068	22.0949	+	+	PE3_PE1;PE7_PE1	54	48	0	3.21093	0.000322772	-0.250327	-9.76862	2.37108	0.00309264	-0.226107	-5.85151	O75150	BRE1B_HUMAN	RNF40	E3 ubiquitin-protein ligase BRE1B
23.2414	22.9357	23.1782	23.0621	22.4946	23.1073	22.9175	22.6955	22.4252		+	PE7_PE1	6	6	0	0.45575	0.235885	-0.230469	-1.05694	1.21263	0.0278207	-0.439058	-2.58062	O75151	PHF2_HUMAN	PHF2	Lysine-specific demethylase PHF2
24.4059	24.4158	24.4226	23.4111	23.377	23.3312	23.4188	23.4119	23.4732	+	+	PE3_PE1;PE7_PE1	35	23	0	5.7993	0	-1.04166	-44.0545	5.98465	0.000806723	-0.980136	-49.0229	O75152	ZC11A_HUMAN	ZC3H11A	Zinc finger CCCH domain-containing protein 11A
21.7763	21.8045	21.751	22.1664	22.163	22.1666	22.2189	22.2607	22.1841	+	+	PE3_PE1;PE7_PE1	47	46	0	4.82139	0	0.388098	25.0459	4.09688	0.000320162	0.44401	16.4475	O75153	CLU_HUMAN	CLUH	Clustered mitochondria protein homolog
21.1312	21.3375	21.1605	22.4046	22.3353	22.3708	22.377	22.3935	22.3887	+	+	PE3_PE1;PE7_PE1	29	28	0	4.17372	0	1.16049	17.2003	4.27152	0.00022248	1.17666	18.2073	O75155	CAND2_HUMAN	CAND2	Cullin-associated NEDD8-dissociated protein 2
21.1207	20.9825	20.645	21.0541	21.2783	21.2935	21.2149	21.0794	21.0338				7	6	0	0.843233	0.0669737	0.29258	1.81642	0.567641	0.161383	0.19332	1.27723	O75157	T22D2_HUMAN	TSC22D2	TSC22 domain family protein 2
19.1001	19.1118	18.7775	18.9575	19.0851	19.1065	18.7816	18.7767	19.102				19	17	0	0.1689	0.811134	0.0532379	0.44732	0.288621	0.532362	-0.109697	-0.714334	O75164	KDM4A_HUMAN	KDM4A	Lysine-specific demethylase 4A
22.7726	22.732	22.7312	22.8168	22.7866	22.7905	22.8067	22.8339	22.8014	+	+	PE3_PE1;PE7_PE1	91	91	0	1.46867	0.0146638	0.0526721	3.16599	1.80843	0.0074472	0.068676	4.04464	O75165	DJC13_HUMAN	DNAJC13	DnaJ homolog subfamily C member 13
20.7113	20.7369	20.8408	20.2199	20.1021	19.5415	20.2821	20.0552	20.2474	+	+	PE3_PE1;PE7_PE1	4	4	0	1.71725	0.00804243	-0.808507	-3.79563	2.66392	0.0018119	-0.568137	-7.02062	O75167	PHAR2_HUMAN	PHACTR2	Phosphatase and actin regulator 2
20.8125	20.9438	20.9564	21.7621	21.7212	21.747	21.8125	21.8179	21.7699	+	+	PE3_PE1;PE7_PE1	30	30	0	4.2184	0	0.839231	17.6535	4.29812	0.00022695	0.895902	18.4911	O75170	PP6R2_HUMAN	PPP6R2	Serine/threonine-protein phosphatase 6 regulatory subunit 2
21.1271	21.0868	21.0613	20.996	21.0536	20.8715	20.9526	20.908	20.9069	+	+	PE3_PE1;PE7_PE1	17	17	0	0.969256	0.0472208	-0.11805	-2.06913	2.64636	0.00196364	-0.169238	-6.94525	O75175	CNOT3_HUMAN	CNOT3	CCR4-NOT transcription complex subunit 3
19.7031	19.3603	19.8831	20.5862	20.3929	20.5148	20.2577	20.2304	20.4642	+	+	PE3_PE1;PE7_PE1	3	3	0	2.18492	0.00250527	0.849111	5.19636	1.76641	0.0080188	0.668578	3.9286	O75177	CREST_HUMAN	SS18L1	Calcium-responsive transactivator
20.4572	20.3224	20.4503	20.4851	20.3652	20.5478	20.4573	20.3321	20.4898				26	26	0	0.334162	0.412013	0.056057	0.810195	0.0900264	0.906547	0.0164522	0.252941	O75179	ANR17_HUMAN	ANKRD17	Ankyrin repeat domain-containing protein 17
20.8326	20.7438	21.0974	21.8312	21.5917	21.5681	21.8496	21.6851	21.8841	+	+	PE3_PE1;PE7_PE1	18	18	0	2.33027	0.0019449	0.772411	5.70244	2.76278	0.00160654	0.914986	7.45848	O75182	SIN3B_HUMAN	SIN3B	Paired amphipathic helix protein Sin3b
22.4326	22.1148	22.5416	22.4119	22.2451	22.2932	22.1499	22.2832	22.0403				7	4	0	0.12311	0.870295	-0.0462386	-0.336845	0.633227	0.130005	-0.205179	-1.40512	O75190	DNJB6_HUMAN	DNAJB6	DnaJ homolog subfamily B member 6
22.6239	22.3746	22.5121	22.8979	22.9931	22.8518	22.6532	23.2046	23.0091	+	+	PE3_PE1;PE7_PE1	12	12	0	2.10512	0.00299588	0.410692	4.93404	1.20197	0.0284975	0.452074	2.5574	O75191	XYLB_HUMAN	XYLB	Xylulose kinase
23.4536	23.7014	23.6268	22.3803	22.4638	22.5476	22.5229	22.646	22.5491	+	+	PE3_PE1;PE7_PE1	9	9	0	3.67646	8.32215e-05	-1.13001	-12.8625	3.61376	0.000714976	-1.02131	-12.3973	O75208	COQ9_HUMAN	COQ9	Ubiquinone biosynthesis protein COQ9
24.3335	24.2336	24.2686	24.6911	24.6686	24.5313	24.6275	24.688	24.638	+	+	PE3_PE1;PE7_PE1	11	11	0	2.43114	0.00153561	0.351746	6.07675	3.37085	0.000889898	0.372606	10.7418	O75223	GGCT_HUMAN	GGCT	Gamma-glutamylcyclotransferase
25.1772	25.123	25.1366	24.8502	24.8561	24.8528	24.8226	24.9337	24.8853	+	+	PE3_PE1;PE7_PE1	6	6	0	4.23753	0	-0.292552	-17.851	2.73929	0.00171297	-0.265078	-7.35231	O75251	NDUS7_HUMAN	NDUFS7	NADH dehydrogenase [ubiquinone] iron-sulfur protein 7
25.3919	25.3982	25.4076	25.0583	25.0643	25.1266	25.0278	25.0886	25.0981	+	+	PE3_PE1;PE7_PE1	22	22	0	3.84257	9.41534e-05	-0.316177	-14.1779	3.88858	0.000372881	-0.327741	-14.5647	O75306	NDUS2_HUMAN	NDUFS2	NADH dehydrogenase [ubiquinone] iron-sulfur protein 2
22.9273	22.9631	23.0067	23.6422	23.6122	23.6153	23.5885	23.6462	23.6383	+	+	PE3_PE1;PE7_PE1	20	20	0	4.91569	0	0.657551	26.4502	4.64088	0.000156352	0.658677	22.5601	O75312	ZPR1_HUMAN	ZPR1	Zinc finger protein ZPR1
21.873	21.6975	21.7399	21.8973	21.6976	21.8453	21.8276	22.0277	21.4159				6	6	0	0.209888	0.740075	0.0432523	0.541754	0.0233189	0.976868	-0.0130965	-0.0697742	O75319	DUS11_HUMAN	DUSP11	RNA/RNP complex-1-interacting phosphatase
22.2832	22.3003	22.197	22.8529	22.9015	22.9221	22.9863	23.0789	22.8794	+	+	PE3_PE1;PE7_PE1	8	8	0	4.11662	0	0.632066	16.6378	3.40247	0.000912158	0.721416	10.9448	O75323	NIPS2_HUMAN	NIPSNAP2	Protein NipSnap homolog 2
22.3836	22.4232	22.4139	22.1532	22.1328	22.229	22.187	22.2639	22.2058	+	+	PE3_PE1;PE7_PE1	34	33	0	2.75886	0.000919453	-0.235215	-7.44064	2.70919	0.00173394	-0.187976	-7.2182	O75330	HMMR_HUMAN	HMMR	Hyaluronan mediated motility receptor
26.4515	26.5012	26.5057	25.7451	25.7261	25.7469	25.7369	25.8751	25.7348	+	+	PE3_PE1;PE7_PE1	8	8	0	5.63992	0	-0.746772	-40.1857	3.84565	0.000363036	-0.70388	-14.2035	O75340	PDCD6_HUMAN	PDCD6	Programmed cell death protein 6
26.3079	26.3222	26.3445	26.4243	26.4749	26.4333	26.4586	26.4826	26.4321	+	+	PE3_PE1;PE7_PE1	12	12	0	2.49545	0.0014451	0.119286	6.32596	2.74243	0.00171429	0.132908	7.36643	O75347	TBCA_HUMAN	TBCA	Tubulin-specific chaperone A
24.3925	24.4426	24.3729	24.3692	24.4459	24.4109	24.3883	24.4541	24.4912				5	5	0	0.0692426	0.933135	0.00601514	0.198105	0.500915	0.202868	0.0418663	1.14636	O75348	VATG1_HUMAN	ATP6V1G1	V-type proton ATPase subunit G 1
24.4959	24.3916	24.5203	23.5782	23.5084	23.5438	23.5823	23.543	23.5803	+	+	PE3_PE1;PE7_PE1	26	21	0	4.50781	0	-0.925754	-20.8852	4.57425	0.000148377	-0.900731	-21.7055	O75351	VPS4B_HUMAN	VPS4B	Vacuolar protein sorting-associated protein 4B
23.4577	23.298	23.3575	23.1371	23.2119	23.3451	23.0959	23.2696	23.1295		+	PE7_PE1	2	2	0	0.846308	0.0664692	-0.139676	-1.82252	1.3615	0.0193712	-0.206057	-2.91406	O75352	MPU1_HUMAN	MPDU1	Mannose-P-dolichol utilization defect 1 protein
19.1835	19.0238	19.1219	20.2008	20.3055	20.1982	20.3134	20.2418	20.3912	+	+	PE3_PE1;PE7_PE1	11	11	0	4.36802	0	1.12511	19.2575	4.34552	0.000235872	1.20573	19.0075	O75354	ENTP6_HUMAN	ENTPD6	Ectonucleoside triphosphate diphosphohydrolase 6
22.2479	22.1364	22.259	22.7437	22.6052	22.7104	22.6722	22.5515	22.6049	+	+	PE3_PE1;PE7_PE1	25	25	0	2.92831	0.000491925	0.471987	8.24632	2.77852	0.00161725	0.395103	7.53038	O75362	ZN217_HUMAN	ZNF217	Zinc finger protein 217
26.3548	26.3487	26.3246	24.9919	25.0701	24.964	24.9188	25.0268	24.8083	+	+	PE3_PE1;PE7_PE1	17	15	0	5.64718	0	-1.33403	-40.3543	4.6246	0.0001536	-1.4247	-22.3483	O75367	H2AY_HUMAN	MACROH2A1	Core histone macro-H2A.1
25.4323	25.3398	25.3934	24.8122	24.8045	24.7684	24.625	24.6445	24.617	+	+	PE3_PE1;PE7_PE1	12	12	0	4.41377	0	-0.59347	-19.776	4.9589	0.000218679	-0.75968	-27.1194	O75368	SH3L1_HUMAN	SH3BGRL	Adapter SH3BGRL
22.3989	22.3187	22.404	21.8973	22.1529	22.051	22.0821	22.0248	22.0892	+	+	PE3_PE1;PE7_PE1	49	46	0	1.89522	0.00528817	-0.340151	-4.29173	3.07169	0.00117143	-0.308504	-8.98893	O75376	NCOR1_HUMAN	NCOR1	Nuclear receptor corepressor 1
20.9275	21.0186	21.1052	20.997	21.0599	21.2202	21.0601	20.9798	21.1207				5	5	0	0.3761	0.333497	0.0752595	0.896571	0.216295	0.720483	0.0364558	0.556194	O75379	VAMP4_HUMAN	VAMP4	Vesicle-associated membrane protein 4
24.6028	24.7217	24.715	23.4783	23.6936	23.6193	23.5796	23.6317	23.6093	+	+	PE3_PE1;PE7_PE1	8	8	0	3.89698	0	-1.08275	-14.6364	4.88039	0.00020339	-1.07295	-25.9156	O75380	NDUS6_HUMAN	NDUFS6	NADH dehydrogenase [ubiquinone] iron-sulfur protein 6
22.4811	22.6153	22.5483	23.0308	23.0886	23.0684	23.1949	23.1068	23.1608	+	+	PE3_PE1;PE7_PE1	12	12	0	3.58194	0.000155779	0.514367	12.1673	3.69993	0.000669604	0.605943	13.0411	O75381	PEX14_HUMAN	PEX14	Peroxisomal membrane protein PEX14
19.7053	18.7199	17.0029	20.6483	20.7076	20.368	20.6117	20.505	20.653	+	+	PE3_PE1;PE7_PE1	13	11	1	1.23736	0.0244942	2.09863	2.63479	1.25468	0.0253905	2.11389	2.67302	O75382	TRIM3_HUMAN	TRIM3	Tripartite motif-containing protein 3
18.007	18.1766	18.2979	17.913	17.4932	18.4453	18.5577	18.5032	18.3841		+	PE7_PE1	2	2	1	0.295397	0.511872	-0.20996	-0.728755	1.50488	0.013673	0.321184	3.25358	O75386	TULP3_HUMAN	TULP3	Tubby-related protein 3
27.073	26.9907	26.9925	26.979	27.0175	26.9952	27.0714	27.1579	27.094		+	PE7_PE1	17	17	0	0.29714	0.507623	-0.0214888	-0.732454	1.1161	0.0353849	0.0890592	2.37333	O75390	CISY_HUMAN	CS	Citrate synthase
20.4045	20.2653	20.368	20.3244	20.0162	20.2514	20.1358	20.224	20.0047		+	PE7_PE1	8	8	0	0.660291	0.114102	-0.148561	-1.45783	1.37629	0.0185426	-0.224447	-2.94821	O75391	SPAG7_HUMAN	SPAG7	Sperm-associated antigen 7
23.8609	23.6357	23.6885	24.0267	23.6895	23.9569	23.686	23.952	23.9302				2	2	0	0.589734	0.144773	0.162697	1.32036	0.513312	0.19437	0.127694	1.17076	O75394	RM33_HUMAN	MRPL33	Large ribosomal subunit protein bL33m
25.2133	25.2977	25.2089	25.5025	25.5035	25.439	25.4809	25.5044	25.4584	+	+	PE3_PE1;PE7_PE1	15	15	0	2.59546	0.00116075	0.241732	6.73079	2.79091	0.00159368	0.241293	7.58737	O75396	SC22B_HUMAN	SEC22B	Vesicle-trafficking protein SEC22b
23.9592	23.852	23.9367	23.5843	23.5405	23.516	23.643	23.6786	23.5834	+	+	PE3_PE1;PE7_PE1	27	26	0	3.18914	0.000318204	-0.369006	-9.64262	2.5527	0.00219597	-0.280951	-6.55505	O75400	PR40A_HUMAN	PRPF40A	Pre-mRNA-processing factor 40 homolog A
23.0972	23.1338	23.1458	23.1283	23.1492	23.0428	23.1303	23.1425	23.0136				39	35	0	0.204169	0.750867	-0.0188669	-0.528795	0.277392	0.564561	-0.0301062	-0.690304	O75410	TACC1_HUMAN	TACC1	Transforming acidic coiled-coil-containing protein 1
21.7535	21.6675	21.5533	22.5644	22.5029	22.5804	22.6728	22.6521	22.6205	+	+	PE3_PE1;PE7_PE1	10	10	0	3.84961	9.46565e-05	0.891148	14.2365	4.10499	0.000322778	0.990377	16.5254	O75414	NDK6_HUMAN	NME6	Nucleoside diphosphate kinase 6
20.486	20.6523	20.6244	20.6178	20.6678	20.7481	20.8174	20.615	20.869				12	12	0	0.637486	0.123147	0.0903416	1.41342	0.90036	0.0624496	0.179578	1.93019	O75419	CDC45_HUMAN	CDC45	Cell division control protein 45 homolog
20.3806	19.7396	20.4966	21.1602	21.2155	21.1793	21.1417	20.9817	20.771	+	+	PE3_PE1;PE7_PE1	12	12	0	1.84606	0.0057715	0.979385	4.15052	1.37031	0.0188773	0.759211	2.93437	O75420	GGYF1_HUMAN	GIGYF1	GRB10-interacting GYF protein 1
22.3588	22.3522	22.2836	23.1795	23.2313	23.1343	23.1421	23.1279	23.2063	+	+	PE3_PE1;PE7_PE1	28	28	0	4.67554	0	0.850146	23.0176	4.7679	0.000178439	0.827237	24.2822	O75427	LRCH4_HUMAN	LRCH4	Leucine-rich repeat and calponin homology domain-containing protein 4
23.1281	23.1098	23.1438	23.3929	23.3181	23.3125	23.3001	23.3705	23.3381	+	+	PE3_PE1;PE7_PE1	10	10	0	2.81914	0.000776424	0.213902	7.71879	3.11849	0.00119825	0.209007	9.24434	O75431	MTX2_HUMAN	MTX2	Metaxin-2
24.5245	24.5425	24.5566	23.7533	23.6674	23.6474	23.7115	23.7416	23.758	+	+	PE3_PE1;PE7_PE1	19	17	0	4.83235	0	-0.851868	-25.2052	5.97704	0.0008	-0.804188	-48.8083	O75436	VP26A_HUMAN	VPS26A	Vacuolar protein sorting-associated protein 26A
24.4507	24.4642	24.3149	23.5635	23.5166	23.4378	23.5962	23.4575	23.5349	+	+	PE3_PE1;PE7_PE1	3	3	0	3.94184	0	-0.903994	-15.0252	3.83616	0.000360952	-0.880428	-14.1248	O75438	NDUB1_HUMAN	NDUFB1	NADH dehydrogenase [ubiquinone] 1 beta subcomplex subunit 1
26.1629	26.206	26.223	25.8811	25.941	25.9195	25.9405	25.9067	25.9198	+	+	PE3_PE1;PE7_PE1	22	21	0	3.45972	0.000143022	-0.283459	-11.3215	3.75527	0.000704247	-0.274991	-13.4713	O75439	MPPB_HUMAN	PMPCB	Mitochondrial-processing peptidase subunit beta
22.3748	22.3889	22.4284	22.0844	21.9674	22.2521	22.1501	22.206	22.1441	+	+	PE3_PE1;PE7_PE1	7	7	0	1.61058	0.0102678	-0.296066	-3.51708	3.08805	0.00118042	-0.230633	-9.07743	O75446	SAP30_HUMAN	SAP30	Histone deacetylase complex subunit SAP30
21.6829	21.8647	21.6893	21.6717	21.7803	21.727	21.788	21.8203	21.8483				28	28	0	0.103246	0.894784	-0.0193113	-0.286933	0.517881	0.191059	0.0732021	1.17975	O75448	MED24_HUMAN	MED24	Mediator of RNA polymerase II transcription subunit 24
20.1978	20.1888	20.1399	19.5983	19.4321	19.2362	19.4239	19.4946	19.4924	+	+	PE3_PE1;PE7_PE1	11	10	0	2.68091	0.000973052	-0.753319	-7.09423	4.7496	0.000173913	-0.705228	-24.0264	O75449	KTNA1_HUMAN	KATNA1	Katanin p60 ATPase-containing subunit A1
25.4569	25.5823	25.5369	26.7498	26.7842	26.7338	26.7792	26.7654	26.784	+	+	PE3_PE1;PE7_PE1	6	6	0	5.1973	0	1.23057	31.1255	5.33822	0.000355556	1.25084	33.7643	O75459	PAGE1_HUMAN	PAGE1	P antigen family member 1
21.3294	21.327	21.3044	21.9831	21.9726	21.9195	21.9697	22.0592	22.0279	+	+	PE3_PE1;PE7_PE1	29	29	0	5.13827	0	0.638114	30.0821	4.85299	0.000197531	0.698626	25.5079	O75460	ERN1_HUMAN	ERN1	Serine/threonine-protein kinase/endoribonuclease IRE1
24.0267	23.8712	23.8865	23.4624	23.4285	23.4337	23.4983	23.4831	23.4916	+	+	PE3_PE1;PE7_PE1	20	20	0	3.18458	0.000316812	-0.486579	-9.61644	3.03612	0.00128697	-0.437155	-8.79922	O75475	PSIP1_HUMAN	PSIP1	PC4 and SFRS1-interacting protein
22.5971	22.6941	22.7535	23.2754	23.3589	23.2761	23.2432	23.4264	23.2468	+	+	PE3_PE1;PE7_PE1	13	13	0	3.50928	0.000148325	0.621885	11.6575	2.92696	0.00133448	0.623885	8.23958	O75477	ERLN1_HUMAN	ERLIN1	Erlin-1
25.4369	25.2668	25.2905	24.9342	24.9728	24.9265	25.0247	25.0357	25.0578	+	+	PE3_PE1;PE7_PE1	18	18	0	2.66508	0.000967415	-0.386904	-7.02563	2.24518	0.00335229	-0.291979	-5.4016	O75489	NDUS3_HUMAN	NDUFS3	NADH dehydrogenase [ubiquinone] iron-sulfur protein 3
25.0084	24.914	24.9638	24.7639	24.8532	24.7506	24.7229	24.8515	24.8468	+	+	PE3_PE1;PE7_PE1	9	6	0	1.82711	0.00596015	-0.172871	-4.09699	1.43716	0.0162422	-0.155041	-3.09079	O75494	SRS10_HUMAN	SRSF10	Serine/arginine-rich splicing factor 10
19.9465	19.9612	19.6105	20.1696	19.9889	20.1504	20.4479	20.2242	20.2854	+	+	PE3_PE1;PE7_PE1	5	5	0	0.963958	0.0479008	0.263598	2.05837	1.65035	0.0104334	0.479783	3.61939	O75496	GEMI_HUMAN	GMNN	Geminin
21.9269	21.6649	21.9257	21.2125	21.1299	21.125	21.0718	21.0497	21.0805	+	+	PE3_PE1;PE7_PE1	7	7	0	2.76296	0.000922256	-0.6834	-7.45928	3.03843	0.00128877	-0.771836	-8.8114	O75503	CLN5_HUMAN	CLN5	Bis(monoacylglycero)phosphate synthase CLN5
20.7243	20.8657	21.2203	21.648	21.461	21.6552	20.9916	21.1274	20.9114	+		PE3_PE1	5	5	0	1.81193	0.00632208	0.651282	4.05442	0.173144	0.798876	0.073363	0.457277	O75506	HSBP1_HUMAN	HSBP1	Heat shock factor-binding protein 1
23.9117	23.9325	23.9221	24.1429	24.1756	24.1566	24.1476	24.1455	24.1438	+	+	PE3_PE1;PE7_PE1	19	19	0	4.52136	0	0.236258	21.05	5.47736	0.000419214	0.223502	36.5879	O75521	ECI2_HUMAN	ECI2	Enoyl-CoA delta isomerase 2
22.4498	22.4252	22.2988	20.9217	21.0206	21.1413	21.0994	20.7488	21.1082	+	+	PE3_PE1;PE7_PE1	7	7	0	4.18251	0	-1.36338	-17.2885	3.41812	0.000922353	-1.40582	-11.0466	O75525	KHDR3_HUMAN	KHDRBS3	KH domain-containing
19.8584	20.0707	19.7194	19.6227	19.8014	19.7858	19.6446	19.8656	19.2656				7	7	0	0.553317	0.163681	-0.146203	-1.24923	0.648317	0.124382	-0.290919	-1.43451	O75528	TADA3_HUMAN	TADA3	Transcriptional adapter 3
19.916	20.2017	20.3898	19.552	19.7055	19.5354	19.7593	19.5472	19.4757	+	+	PE3_PE1;PE7_PE1	12	12	0	1.7417	0.00746495	-0.571563	-3.86138	1.62377	0.0108585	-0.575104	-3.55083	O75529	TAF5L_HUMAN	TAF5L	TAF5-like RNA polymerase II p300/CBP-associated factor-associated factor 65 kDa subunit 5L
22.2507	22.3625	22.3378	22.4923	22.4779	22.4376	22.4211	22.4228	22.5432	+	+	PE3_PE1;PE7_PE1	16	16	0	1.80831	0.00634719	0.15227	4.04432	1.29178	0.0233596	0.145382	2.75568	O75530	EED_HUMAN	EED	Polycomb protein EED
27.3442	27.4539	27.4432	27.3928	27.3036	27.3683	27.0184	27.1161	27.0863		+	PE7_PE1	7	7	0	0.600425	0.139932	-0.0588926	-1.34121	2.77247	0.00161283	-0.340185	-7.50265	O75531	BAF_HUMAN	BANF1	Barrier-to-autointegration factor
24.8793	24.9086	24.9521	24.6711	24.6787	24.6945	24.7403	24.7134	24.7178	+	+	PE3_PE1;PE7_PE1	58	58	0	3.32098	0.00018153	-0.231845	-10.429	2.94744	0.00134892	-0.189491	-8.34206	O75533	SF3B1_HUMAN	SF3B1	Splicing factor 3B subunit 1
24.5575	24.5338	24.5259	24.5212	24.5698	24.5415	24.5113	24.561	24.5432				51	51	0	0.107282	0.890018	0.00505257	0.297184	0.0112189	0.988808	-0.000590642	-0.0340104	O75534	CSDE1_HUMAN	CSDE1	Cold shock domain-containing protein E1
18.1924	17.7505	18.0091	18.2591	18.2582	18.1298	18.4294	17.3973	18.1278				2	2	1	0.791266	0.0775053	0.231694	1.71386	0.000825694	0.998771	0.000841141	0.00253257	O75554	WBP4_HUMAN	WBP4	WW domain-binding protein 4
20.5346	20.5502	20.595	19.986	19.5639	19.9103	20.1777	20.1453	20.1824	+	+	PE3_PE1;PE7_PE1	8	8	0	2.31269	0.0019934	-0.739811	-5.63922	4.26985	0.000221965	-0.391422	-18.1897	O75558	STX11_HUMAN	STX11	Syntaxin-11
23.479	23.5672	23.5095	23.3398	23.4133	23.4398	23.3299	23.4994	23.3649	+		PE3_PE1	13	13	0	1.42398	0.0162292	-0.120993	-3.05963	0.977452	0.0501959	-0.120504	-2.08581	O75569	PRKRA_HUMAN	PRKRA	Interferon-inducible double-stranded RNA-dependent protein kinase activator A
17.64	17.471	17.5287	17.3656	16.8837	16.7682	18.9131	17.0555	15.5004	+		PE3_PE1	7	7	1	1.33486	0.019471	-0.540754	-2.85306	0.146958	0.836997	-0.390259	-0.395117	O75570	RF1M_HUMAN	MTRF1	Peptide chain release factor 1
20.7168	20.7391	20.6191	20.9794	20.8371	20.9531	21.0687	21.1039	21.0897	+	+	PE3_PE1;PE7_PE1	3	3	0	1.80987	0.00631898	0.231511	4.04868	3.30775	0.000853101	0.395725	10.3475	O75575	RPC9_HUMAN	CRCP	DNA-directed RNA polymerase III subunit RPC9
16.9802	16.9492	16.867	17.2884	17.0689	16.7302	17.1164	16.3116	17.2143				6	4	2	0.229326	0.697343	0.0970605	0.585325	0.0619154	0.939436	-0.0513585	-0.178331	O75581	LRP6_HUMAN	LRP6	Low-density lipoprotein receptor-related protein 6
18.8594	19.0315	18.9714	19.1791	19.0006	18.9752	18.8074	18.8907	18.8469				14	12	0	0.525779	0.180602	0.0975297	1.19526	0.881646	0.0652716	-0.10579	-1.89279	O75582	KS6A5_HUMAN	RPS6KA5	Ribosomal protein S6 kinase alpha-5
20.4856	20.3574	20.1743	20.487	20.54	20.531	20.4225	20.3014	20.4269				7	7	0	0.916729	0.0547802	0.18022	1.96301	0.169252	0.8036	0.04448	0.448148	O75586	MED6_HUMAN	MED6	Mediator of RNA polymerase II transcription subunit 6
23.9145	23.8329	23.819	23.983	23.9109	23.983	23.9756	23.9402	23.981	+	+	PE3_PE1;PE7_PE1	102	102	0	1.26902	0.022783	0.103516	2.70483	1.56377	0.0120493	0.110149	3.39893	O75592	MYCB2_HUMAN	MYCBP2	E3 ubiquitin-protein ligase MYCBP2
23.7738	23.8663	23.8232	24.3741	24.4087	24.4141	24.372	24.3449	24.4177	+	+	PE3_PE1;PE7_PE1	4	4	0	4.39705	0	0.57784	19.5849	4.08353	0.000315369	0.557049	16.3201	O75607	NPM3_HUMAN	NPM3	Nucleoplasmin-3
25.8917	25.8121	25.8821	25.3537	25.3676	25.3703	25.4939	25.4048	25.4041	+	+	PE3_PE1;PE7_PE1	8	8	0	4.38551	0	-0.498071	-19.4541	3.40776	0.000915888	-0.427715	-10.9791	O75608	LYPA1_HUMAN	LYPLA1	Acyl-protein thioesterase 1
22.3117	22.2869	22.2042	22.4611	22.3744	22.4329	22.4813	22.4886	22.4413	+	+	PE3_PE1;PE7_PE1	12	12	0	1.70204	0.00826685	0.155183	3.7551	2.32548	0.00315757	0.202763	5.68517	O75616	ERAL1_HUMAN	ERAL1	GTPase Era
21.8336	21.8394	21.9004	21.7437	21.8168	21.7631	21.7647	21.8605	21.6634	+		PE3_PE1	24	24	0	1.27748	0.0222742	-0.0832774	-2.72368	0.713498	0.102421	-0.0949313	-1.56155	O75626	PRDM1_HUMAN	PRDM1	PR domain zinc finger protein 1
20.6256	19.8515	20.4525	21.5119	21.5933	21.4466	21.7222	21.7967	21.5443	+	+	PE3_PE1;PE7_PE1	5	5	0	2.14552	0.00264166	1.20739	5.0655	2.30065	0.00318823	1.37786	5.59621	O75629	CREG1_HUMAN	CREG1	Protein CREG1
24.1745	24.1751	24.163	24.0501	24.0843	24.0683	24.0228	24.076	24.0749	+	+	PE3_PE1;PE7_PE1	120	119	0	3.2018	0.000321182	-0.103319	-9.71564	2.48385	0.00249983	-0.11297	-6.28039	O75643	U520_HUMAN	SNRNP200	U5 small nuclear ribonucleoprotein 200 kDa helicase
23.9845	23.8879	23.7083	24.7556	24.7689	24.8293	24.8333	24.8447	24.8668	+	+	PE3_PE1;PE7_PE1	17	17	0	3.41076	0.000139091	0.924352	10.9986	3.57528	0.000765217	0.988021	12.1197	O75648	MTU1_HUMAN	TRMU	Mitochondrial tRNA-specific 2-thiouridylase 1
24.5785	24.5058	24.6023	24.3639	24.4006	24.3916	24.4426	24.4165	24.3937	+	+	PE3_PE1;PE7_PE1	14	14	0	2.32713	0.0019752	-0.176814	-5.69112	1.9573	0.0054988	-0.144578	-4.47487	O75663	TIPRL_HUMAN	TIPRL	TIP41-like protein
18.8611	18.8129	18.8082	18.5001	18.8141	18.7999	18.4853	18.7867	18.5948		+	PE7_PE1	5	5	1	0.519007	0.184717	-0.122646	-1.18196	1.07467	0.0391157	-0.205084	-2.28627	O75665	OFD1_HUMAN	OFD1	Centriole and centriolar satellite protein OFD1
21.0443	20.6644	20.9859	19.2596	18.9769	19.3394	19.3731	19.4423	19.3543	+	+	PE3_PE1;PE7_PE1	7	7	0	3.34416	0.000184154	-1.70623	-10.5733	3.62172	0.000718447	-1.50834	-12.4554	O75674	TM1L1_HUMAN	TOM1L1	TOM1-like protein 1
20.5614	20.5383	20.2962	16.9584	19.5308	19.9157	19.6544	19.1997	20.321		+	PE7_PE1	8	8	1	0.827213	0.0696464	-1.66365	-1.78472	1.03317	0.0435345	-0.740249	-2.20006	O75676	KS6A4_HUMAN	RPS6KA4	Ribosomal protein S6 kinase alpha-4
24.0223	23.942	24.081	23.7594	23.7425	23.7405	23.7918	23.7481	23.6602	+	+	PE3_PE1;PE7_PE1	10	10	0	2.55688	0.00128212	-0.26765	-6.57204	2.13925	0.00411829	-0.281768	-5.04495	O75683	SURF6_HUMAN	SURF6	Surfeit locus protein 6
22.4463	22.4809	22.4851	22.4557	22.5168	22.4977	22.3854	22.4693	22.356				18	15	0	0.370376	0.343077	0.019317	0.884874	0.865459	0.068218	-0.0671762	-1.86055	O75688	PPM1B_HUMAN	PPM1B	Protein phosphatase 1B
25.3923	25.3669	25.3481	25.5681	25.5563	25.4908	25.5833	25.5801	25.5425	+	+	PE3_PE1;PE7_PE1	84	84	0	2.46754	0.00146278	0.169284	6.21677	3.39474	0.000905835	0.199539	10.8948	O75691	UTP20_HUMAN	UTP20	Small subunit processome component 20 homolog
23.6503	23.6934	23.6581	23.8214	23.8669	23.8129	23.8403	23.8301	23.8663	+	+	PE3_PE1;PE7_PE1	44	44	0	2.83467	0.000694346	0.166435	7.7919	3.3238	0.000862961	0.178286	10.4465	O75694	NU155_HUMAN	NUP155	Nuclear pore complex protein Nup155
22.9333	22.9542	22.9512	22.3815	22.2662	22.1464	22.2757	22.2694	22.1737	+	+	PE3_PE1;PE7_PE1	8	8	0	3.2496	0.000330629	-0.681561	-9.99608	4.51749	0.000138929	-0.706664	-21.0028	O75695	XRP2_HUMAN	RP2	Protein XRP2
18.0221	18.0347	17.5805	17.2542	17.0743	17.0134	17.3146	18.0576	17.2038	+		PE3_PE1	3	3	1	2.00234	0.00382494	-0.765149	-4.61127	0.504337	0.200621	-0.353811	-1.1531	O75716	STK16_HUMAN	STK16	Serine/threonine-protein kinase 16
20.6762	20.6582	20.5354	20.2049	20.3791	20.25	20.4399	20.3495	20.3055	+	+	PE3_PE1;PE7_PE1	26	26	0	2.13992	0.00263502	-0.345299	-5.04712	1.91628	0.00606637	-0.25831	-4.35327	O75717	WDHD1_HUMAN	WDHD1	WD repeat and HMG-box DNA-binding protein 1
22.7378	22.7047	22.7169	23.7464	23.8205	23.7652	23.7504	23.7413	23.7511	+	+	PE3_PE1;PE7_PE1	19	19	0	5.78263	0	1.05759	43.633	7.24388	0	1.02782	101.26	O75718	CRTAP_HUMAN	CRTAP	Cartilage-associated protein
22.3814	22.287	22.2718	22.8429	22.8171	22.7078	22.8837	22.9212	22.889	+	+	PE3_PE1;PE7_PE1	23	23	0	3.0461	0.000387383	0.475851	8.85203	4.06364	0.00043222	0.584541	16.1319	O75746	S2512_HUMAN	SLC25A12	Electrogenic aspartate/glutamate antiporter SLC25A12
17.876	17.8393	18.0601	18.264	18.3184	18.2887	18.0179	18.4886	18.3949	+	+	PE3_PE1;PE7_PE1	6	6	0	2.18847	0.00251027	0.365219	5.20826	1.10835	0.0360171	0.375351	2.35696	O75752	B3GL1_HUMAN	B3GALNT1	UDP-GalNAc:beta-1
21.5579	21.4822	21.5369	21.9121	21.9057	21.8994	21.8183	21.8653	21.9502	+	+	PE3_PE1;PE7_PE1	13	13	0	4.11532	0	0.380061	16.6252	2.85304	0.00151718	0.352269	7.87922	O75787	RENR_HUMAN	ATP6AP2	Renin receptor
22.4474	22.4483	22.5047	22.281	22.1532	22.2718	22.2532	22.0905	22.2576	+	+	PE3_PE1;PE7_PE1	13	13	0	2.15934	0.00260085	-0.231447	-5.1111	1.99211	0.00520993	-0.266356	-4.58003	O75792	RNH2A_HUMAN	RNASEH2A	Ribonuclease H2 subunit A
22.7645	22.781	22.6556	21.7296	21.7659	21.6872	21.6745	21.7196	21.6741	+	+	PE3_PE1;PE7_PE1	12	12	0	4.60888	0	-1.00617	-22.1456	4.80307	0.000188976	-1.04433	-24.7817	O75794	CD123_HUMAN	CDC123	Translation initiation factor eIF2 assembly protein
18.0714	18.2484	18.0267	18.0404	17.951	18.0113	17.5649	18.149	18.1399				10	10	0	0.721698	0.0955532	-0.114569	-1.57756	0.330355	0.42349	-0.164245	-0.802272	O75808	CAN15_HUMAN	CAPN15	Calpain-15
21.6952	21.5308	21.3485	21.8695	21.8697	21.7814	21.8992	21.9323	21.8043	+	+	PE3_PE1;PE7_PE1	4	4	0	1.40816	0.0167153	0.315406	3.02244	1.52369	0.0131574	0.353811	3.29962	O75817	POP7_HUMAN	POP7	Ribonuclease P protein subunit p20
21.7423	21.6208	21.6363	21.8359	21.9162	21.7501	21.7646	21.7394	21.9643	+		PE3_PE1	12	12	0	1.28245	0.0219996	0.167601	2.73478	0.903243	0.0618777	0.156302	1.93596	O75818	RPP40_HUMAN	RPP40	Ribonuclease P protein subunit p40
15.1641	15.37	15.3141	17.0375	14.8425	14.5897	15.512	15.2843	15.5437				5	5	1	0.0949586	0.904949	0.20716	0.2657	0.735053	0.09653	0.163917	1.60366	O75820	ZN189_HUMAN	ZNF189	Zinc finger protein 189
25.1278	25.0748	25.0685	25.4031	25.4673	25.4212	25.385	25.4371	25.4294	+	+	PE3_PE1;PE7_PE1	23	23	0	3.65331	8.17942e-05	0.340206	12.6889	3.7151	0.00067706	0.326866	13.1576	O75821	EIF3G_HUMAN	EIF3G	Eukaryotic translation initiation factor 3 subunit G
25.2954	25.2765	25.3275	25.4474	25.4027	25.4301	25.4306	25.4388	25.4448	+	+	PE3_PE1;PE7_PE1	16	16	0	2.51894	0.00138175	0.126919	6.41911	3.06296	0.00116422	0.138234	8.94202	O75822	EIF3J_HUMAN	EIF3J	Eukaryotic translation initiation factor 3 subunit J
21.2134	21.3329	19.9989	23.6561	23.6461	23.6518	23.7613	23.7948	23.7853	+	+	PE3_PE1;PE7_PE1	10	10	0	2.55822	0.00128299	2.80292	6.57752	2.63075	0.00203973	2.93207	6.87886	O75828	CBR3_HUMAN	CBR3	Carbonyl reductase [NADPH] 3
19.0046	18.8795	18.6425	19.2406	19.5164	19.2733	19.4923	19.3558	19.2087	+	+	PE3_PE1;PE7_PE1	1	1	0	1.66246	0.00914417	0.501211	3.65092	1.72005	0.00892852	0.510056	3.80312	O75829	CNMD_HUMAN	CNMD	Leukocyte cell-derived chemotaxin 1
23.9124	24.1143	24.2121	23.9841	24.0287	24.0527	24.0177	24.1059	24.1302				12	12	0	0.253302	0.636245	-0.0577628	-0.638146	0.0174935	0.982663	0.00498517	0.0526703	O75832	PSD10_HUMAN	PSMD10	26S proteasome non-ATPase regulatory subunit 10
20.3404	16.8139	20.5177	20.5587	20.8096	20.7368	20.7406	20.826	20.6932				9	9	1	0.53983	0.172465	1.47772	1.22282	0.562546	0.164088	1.52932	1.26728	O75843	AP1G2_HUMAN	AP1G2	AP-1 complex subunit gamma-like 2
24.6275	24.6093	24.5936	24.8244	24.8838	24.869	24.7516	24.8305	24.8694	+	+	PE3_PE1;PE7_PE1	14	14	0	3.58977	0.000156566	0.248937	12.2235	2.3423	0.00315144	0.207055	5.74605	O75844	FACE1_HUMAN	ZMPSTE24	CAAX prenyl protease 1 homolog
18.2939	17.0044	18.4752	19.6576	19.8931	19.7002	19.8374	19.472	19.6279	+	+	PE3_PE1;PE7_PE1	2	2	1	1.75439	0.00707316	1.82582	3.89579	1.65208	0.010362	1.72126	3.62388	O75845	SC5D_HUMAN	SC5D	Lathosterol oxidase
21.9367	21.9561	21.8802	21.1913	21.2103	21.2886	21.1808	21.3436	21.2575	+	+	PE3_PE1;PE7_PE1	7	7	0	4.30146	0	-0.694314	-18.527	3.65499	0.000735795	-0.663722	-12.7014	O75865	TPC6A_HUMAN	TRAPPC6A	Trafficking protein particle complex subunit 6A
23.723	23.6728	23.688	24.4274	24.4476	24.3483	24.2597	24.3283	24.2585	+	+	PE3_PE1;PE7_PE1	25	25	0	4.52838	0	0.713159	21.1358	4.55103	0.000145455	0.587563	21.4153	O75874	IDHC_HUMAN	IDH1	Isocitrate dehydrogenase [NADP] cytoplasmic
20.91	20.9651	20.8765	21.2273	21.2236	21.182	21.2609	21.1864	21.3186	+	+	PE3_PE1;PE7_PE1	11	11	0	3.23631	0.000327474	0.293772	9.91734	2.73375	0.00170969	0.338124	7.32745	O75879	GATB_HUMAN	GATB	Glutamyl-tRNA(Gln) amidotransferase subunit B
22.9107	22.7421	22.8542	22.4973	22.3912	22.4141	22.584	22.4653	22.4861	+	+	PE3_PE1;PE7_PE1	9	9	0	2.61058	0.00109564	-0.401472	-6.79386	2.20401	0.00363615	-0.323885	-5.2607	O75880	SCO1_HUMAN	SCO1	Protein SCO1 homolog
19.5929	19.8491	19.9567	19.9404	20.0637	19.9258	19.8539	19.8852	19.9353				14	14	0	0.692751	0.104412	0.177059	1.52108	0.344532	0.39383	0.0918674	0.831707	O75882	ATRN_HUMAN	ATRN	Attractin
22.1245	22.1189	22.2036	21.935	21.8117	21.8946	21.874	22.0224	21.7183	+	+	PE3_PE1;PE7_PE1	10	10	0	2.38674	0.00166739	-0.268512	-5.90957	1.40592	0.0171918	-0.27739	-3.01719	O75884	RBBP9_HUMAN	RBBP9	Serine hydrolase RBBP9
22.4089	22.4703	22.4149	22.1451	22.1803	22.1906	22.2355	22.1446	22.2271	+	+	PE3_PE1;PE7_PE1	14	12	0	3.38858	0.000189532	-0.259392	-10.8552	2.55112	0.00219444	-0.228953	-6.54863	O75886	STAM2_HUMAN	STAM2	Signal transducing adapter molecule 2
21.271	21.1667	21.4887	22.6647	22.6036	22.7053	22.7153	22.6316	22.5627	+	+	PE3_PE1;PE7_PE1	37	36	0	3.76879	8.91445e-05	1.34905	13.5784	3.65391	0.000735273	1.32774	12.6933	O75891	AL1L1_HUMAN	ALDH1L1	Cytosolic 10-formyltetrahydrofolate dehydrogenase
20.4293	20.0692	20.151	21.0117	21.1498	21.3152	20.8637	21.2241	21.4564	+	+	PE3_PE1;PE7_PE1	4	4	0	2.59666	0.00116196	0.942422	6.73575	2.04074	0.00474945	0.964889	4.72992	O75896	TUSC2_HUMAN	TUSC2	Tumor suppressor candidate 2
20.3223	20.372	20.4811	21.7132	21.7147	21.7887	21.7894	21.7398	21.6678	+	+	PE3_PE1;PE7_PE1	8	8	0	4.84283	0	1.34704	25.3584	4.66196	0.000161074	1.3405	22.8373	O75907	DGAT1_HUMAN	DGAT1	Diacylglycerol O-acyltransferase 1
22.1528	22.0712	22.077	21.9532	21.911	21.8812	21.8053	21.8888	22.0251	+	+	PE3_PE1;PE7_PE1	13	13	0	2.27872	0.00207175	-0.185218	-5.51861	1.31219	0.0220724	-0.193963	-2.80162	O75909	CCNK_HUMAN	CCNK	Cyclin-K
24.9928	24.8157	24.8611	25.5596	25.6009	25.5858	25.4405	25.5504	25.4226	+	+	PE3_PE1;PE7_PE1	6	6	0	3.65604	8.21736e-05	0.69224	12.7092	3.02608	0.00127223	0.581285	8.74632	O75915	PRAF3_HUMAN	ARL6IP5	PRA1 family protein 3
21.6985	21.6568	21.5993	21.4861	21.4885	21.3732	21.1914	21.1871	21.4354	+	+	PE3_PE1;PE7_PE1	10	10	0	1.87826	0.00541767	-0.202258	-4.24266	1.92284	0.00601101	-0.380231	-4.37255	O75925	PIAS1_HUMAN	PIAS1	E3 SUMO-protein ligase PIAS1
22.4666	22.2186	22.2176	21.7664	21.8379	21.9278	21.8185	22.0023	22.0291	+	+	PE3_PE1;PE7_PE1	9	8	0	2.06459	0.00337864	-0.45691	-4.80479	1.528	0.0130413	-0.351015	-3.31022	O75928	PIAS2_HUMAN	PIAS2	E3 SUMO-protein ligase PIAS2
23.9178	23.957	24.075	23.7	23.817	23.7586	23.7457	23.8087	23.7966	+	+	PE3_PE1;PE7_PE1	13	13	0	1.74496	0.00734926	-0.224748	-3.8702	1.75981	0.00813534	-0.199581	-3.91056	O75934	SPF27_HUMAN	BCAS2	Pre-mRNA-splicing factor SPF27
22.9231	22.9904	22.9999	23.2449	23.2471	23.0766	23.2631	23.33	23.2809	+	+	PE3_PE1;PE7_PE1	10	10	0	1.62595	0.00989321	0.218438	3.55643	3.28368	0.000907725	0.320211	10.2006	O75935	DCTN3_HUMAN	DCTN3	Dynactin subunit 3
24.6284	24.5967	24.6617	24.3387	24.3284	24.3606	24.3936	24.3087	24.2959	+	+	PE3_PE1;PE7_PE1	16	16	0	3.7756	8.98551e-05	-0.286378	-13.6327	2.92819	0.00133619	-0.296211	-8.24574	O75937	DNJC8_HUMAN	DNAJC8	DnaJ homolog subfamily C member 8
22.1571	22.2001	22.1435	21.8727	21.9435	21.8928	21.9067	21.9132	21.8064	+	+	PE3_PE1;PE7_PE1	10	10	0	3.20637	0.000322134	-0.263927	-9.74212	2.78519	0.00159053	-0.291494	-7.56102	O75940	SPF30_HUMAN	SMNDC1	Survival of motor neuron-related-splicing factor 30
21.7866	21.584	21.8071	21.173	21.1258	21.1711	21.3593	21.0386	21.3532	+	+	PE3_PE1;PE7_PE1	17	17	0	2.83908	0.000695997	-0.569263	-7.81281	1.69106	0.00971511	-0.475515	-3.726	O75943	RAD17_HUMAN	RAD17	Cell cycle checkpoint protein RAD17
26.5321	26.5638	26.5306	26.416	26.4141	26.405	26.5267	26.5366	26.537	+		PE3_PE1	14	14	0	3.48861	0.00014614	-0.130454	-11.5162	0.314248	0.460777	-0.00870323	-0.768571	O75947	ATP5H_HUMAN	ATP5PD	ATP synthase subunit d
23.7191	23.7646	23.7418	22.0553	22.0747	22.0565	22.1637	22.177	22.1285	+	+	PE3_PE1;PE7_PE1	24	24	0	7.47049	0	-1.67965	-115.373	6.85987	0.00342857	-1.58544	-81.1702	O75955	FLOT1_HUMAN	FLOT1	Flotillin-1
26.0574	25.9129	25.9232	25.8507	25.8077	25.7805	25.9493	25.9954	25.946	+		PE3_PE1	7	7	0	1.39046	0.0173414	-0.151516	-2.98109	0.00604913	0.994049	-0.000907262	-0.0184441	O75964	ATP5L_HUMAN	ATP5MG	ATP synthase subunit g
21.6364	21.5678	21.598	22.2305	22.244	22.2579	22.2562	22.2764	22.3227	+	+	PE3_PE1;PE7_PE1	44	44	0	5.13939	0	0.643394	30.1014	4.78091	0.000182163	0.684386	24.4658	O75976	CBPD_HUMAN	CPD	Carboxypeptidase D
24.8138	24.7368	24.7882	24.6978	24.7217	24.757	24.7485	24.7491	24.7491				14	14	0	0.887252	0.0596773	-0.0541274	-1.90398	0.608362	0.140594	-0.0307185	-1.35668	O76003	GLRX3_HUMAN	GLRX3	Glutaredoxin-3
24.9224	24.8379	24.8701	24.4931	24.465	24.4028	24.4349	24.4978	24.4583	+	+	PE3_PE1;PE7_PE1	24	24	0	3.50952	0.000148414	-0.423169	-11.6591	3.75261	0.000701538	-0.413172	-13.4503	O76021	RL1D1_HUMAN	RSL1D1	Ribosomal L1 domain-containing protein 1
22.3191	22.1462	22.2407	24.4298	24.4458	24.3781	24.2853	24.3773	24.3624	+	+	PE3_PE1;PE7_PE1	26	26	0	5.65042	0	2.18256	40.4297	5.47867	0.000421053	2.10634	36.6156	O76024	WFS1_HUMAN	WFS1	Wolframin
22.3089	22.2923	22.2668	22.5307	22.4971	22.5091	22.538	22.564	22.5444	+	+	PE3_PE1;PE7_PE1	31	31	0	3.84292	9.42249e-05	0.222991	14.1809	4.23728	0.000215247	0.25945	17.8484	O76031	CLPX_HUMAN	CLPX	ATP-dependent Clp protease ATP-binding subunit clpX-like
23.4471	23.4767	23.396	24.4329	24.439	24.3198	24.1533	24.2482	24.3859	+	+	PE3_PE1;PE7_PE1	4	4	0	4.52649	0	0.957278	21.1127	3.48681	0.000848109	0.822515	11.504	O76062	ERG24_HUMAN	TM7SF2	Delta(14)-sterol reductase TM7SF2
23.3583	23.2753	23.3049	23.1608	23.187	23.2051	23.3003	23.2423	23.2753	+		PE3_PE1	12	12	0	2.02423	0.00358716	-0.128527	-4.67863	0.610911	0.139417	-0.0401904	-1.36165	O76071	CIAO1_HUMAN	CIAO1	Probable cytosolic iron-sulfur protein assembly protein CIAO1
20.3588	19.9983	20.1357	18.6137	18.4373	18.701	18.8604	18.3406	18.9451	+	+	PE3_PE1;PE7_PE1	23	23	0	3.57286	0.000155097	-1.58029	-12.1025	2.58836	0.00213013	-1.44892	-6.7013	O76074	PDE5A_HUMAN	PDE5A	cGMP-specific 3'
18.7478	18.7448	18.7838	19.5601	19.6994	19.5577	19.259	19.5496	19.5042	+	+	PE3_PE1;PE7_PE1	7	7	0	4.20066	0	0.846959	17.4722	2.76069	0.00160342	0.678853	7.44896	O76075	DFFB_HUMAN	DFFB	DNA fragmentation factor subunit beta
20.6256	20.8747	20.8536	20.5829	20.7928	20.759	20.6788	20.9047	20.3852				6	6	0	0.286612	0.538279	-0.0730775	-0.710046	0.307456	0.477447	-0.128402	-0.754274	O76080	ZFAN5_HUMAN	ZFAND5	AN1-type zinc finger protein 5
24.2663	24.2932	24.2745	24.4881	24.4973	24.4713	24.4802	24.5133	24.5417	+	+	PE3_PE1;PE7_PE1	36	36	0	4.32952	0	0.207548	18.8317	3.55926	0.000816327	0.23376	12.006	O76094	SRP72_HUMAN	SRP72	Signal recognition particle subunit SRP72
21.7942	21.852	21.3513	22.2611	22.2461	22.1731	22.321	22.3421	22.5085	+	+	PE3_PE1;PE7_PE1	2	2	0	1.60201	0.0104746	0.560951	3.49528	1.89473	0.00620472	0.724701	4.29031	O76095	JTB_HUMAN	JTB	Protein JTB
21.4182	21.4312	21.1206	21.5449	21.6265	21.6651	21.6947	21.6154	21.8467	+	+	PE3_PE1;PE7_PE1	6	6	0	1.2614	0.0232027	0.28882	2.6879	1.49971	0.0138024	0.395572	3.241	O77932	DXO_HUMAN	DXO	Decapping and exoribonuclease protein
22.1037	22.1395	22.0188	21.9003	21.9937	21.9212	21.9903	21.7276	21.8207	+	+	PE3_PE1;PE7_PE1	9	9	0	1.50937	0.0132717	-0.148937	-3.26456	1.33042	0.0209013	-0.241162	-2.84295	O94760	DDAH1_HUMAN	DDAH1	N(G)
19.4971	19.2178	19.3597	19.4639	19.2373	19.2519	19.4141	19.111	19.4175				16	16	0	0.137377	0.854041	-0.0405064	-0.37191	0.124084	0.866684	-0.044	-0.33926	O94761	RECQ4_HUMAN	RECQL4	ATP-dependent DNA helicase Q4
22.2445	22.2266	22.1745	21.1492	21.2709	21.4058	21.3445	21.2167	21.4348	+	+	PE3_PE1;PE7_PE1	29	29	0	3.58679	0.00015627	-0.939953	-12.2021	3.72719	0.00068623	-0.883226	-13.2513	O94762	RECQ5_HUMAN	RECQL5	ATP-dependent DNA helicase Q5
21.3996	21.2167	21.3859	21.555	21.5882	21.6575	21.4949	21.4609	21.5752	+	+	PE3_PE1;PE7_PE1	21	21	0	1.80145	0.00644212	0.266118	4.0252	1.21989	0.027474	0.176254	2.59648	O94763	RMP_HUMAN	URI1	Unconventional prefoldin RPB5 interactor 1
21.9321	21.8205	21.9894	22.7973	22.8556	22.8465	22.8566	23.0377	22.8408	+	+	PE3_PE1;PE7_PE1	11	10	0	4.19495	0	0.91917	17.4142	3.61748	0.00071547	0.997721	12.4244	O94766	B3GA3_HUMAN	B3GAT3	Galactosylgalactosylxylosylprotein 3-beta-glucuronosyltransferase 3
21.7679	22.2888	22.2852	22.2907	22.3612	22.4584	22.0301	22.1367	22.1191				7	7	0	0.643615	0.12098	0.256164	1.42535	0.0358195	0.964939	-0.0186367	-0.105803	O94768	ST17B_HUMAN	STK17B	Serine/threonine-protein kinase 17B
24.598	24.5844	24.6121	24.2103	24.2142	24.2353	24.2703	24.2601	24.2727	+	+	PE3_PE1;PE7_PE1	34	30	0	5.34587	0	-0.378243	-33.9139	5.50708	0.000440367	-0.330491	-37.2209	O94776	MTA2_HUMAN	MTA2	Metastasis-associated protein MTA2
21.6611	22.0766	21.8341	21.8524	18.1736	22.1235	21.9535	21.6942	22.1002				7	7	1	0.373655	0.337568	-1.14082	-0.891579	0.127205	0.863383	0.0586929	0.346974	O94782	UBP1_HUMAN	USP1	Ubiquitin carboxyl-terminal hydrolase 1
22.6842	22.6896	22.6952	22.6728	22.7727	22.6949	22.6679	22.6075	22.5683		+	PE7_PE1	37	37	0	0.319812	0.44601	0.0237694	0.780245	1.21203	0.0278595	-0.0751432	-2.57932	O94804	STK10_HUMAN	STK10	Serine/threonine-protein kinase 10
22.5422	22.5963	22.5517	22.8051	22.741	22.7866	22.7303	22.6843	22.7311	+	+	PE3_PE1;PE7_PE1	22	18	0	2.96988	0.000504887	0.214179	8.45562	2.58223	0.00215992	0.151873	6.67598	O94806	KPCD3_HUMAN	PRKD3	Serine/threonine-protein kinase D3
20.3107	20.1771	20.3522	20.5948	20.5145	20.3757	20.187	20.3051	20.251	+		PE3_PE1	4	4	0	1.21691	0.0258871	0.214945	2.58997	0.197704	0.756839	-0.0323289	-0.514065	O94811	TPPP_HUMAN	TPPP	Tubulin polymerization-promoting protein
20.9181	20.2263	20.5551	20.9994	21.2801	21.3064	21.2257	21.2102	21.2694	+	+	PE3_PE1;PE7_PE1	4	4	0	1.32215	0.0199796	0.628804	2.82417	1.5373	0.0127396	0.668601	3.33317	O94817	ATG12_HUMAN	ATG12	Ubiquitin-like protein ATG12
23.071	23.0918	23.0689	22.4697	22.4217	22.4644	22.4275	22.4592	22.4134	+	+	PE3_PE1;PE7_PE1	63	63	0	5.50197	0	-0.625322	-37.1113	5.70832	0.000571429	-0.643897	-41.8026	O94822	LTN1_HUMAN	LTN1	E3 ubiquitin-protein ligase listerin
25.3873	25.3598	25.377	25.7181	25.7637	25.7531	25.8255	25.8701	25.8567	+	+	PE3_PE1;PE7_PE1	35	35	0	4.69075	0	0.370246	23.2214	5.1799	0.000275862	0.476082	30.8143	O94826	TOM70_HUMAN	TOMM70	Mitochondrial import receptor subunit TOM70
22.2344	22.1953	22.2991	21.8531	21.8559	21.783	21.8818	21.7561	21.7077	+	+	PE3_PE1;PE7_PE1	23	23	0	3.36404	0.000186551	-0.412247	-10.6986	2.81018	0.0016083	-0.461018	-7.67688	O94829	IPO13_HUMAN	IPO13	Importin-13
21.376	21.1335	21.4105	20.2357	18.7138	20.6739	20.5502	16.8531	20.2751	+		PE3_PE1	10	10	2	1.12192	0.0324972	-1.43218	-2.38566	0.80702	0.0797292	-2.08052	-1.74487	O94830	DDHD2_HUMAN	DDHD2	Phospholipase DDHD2
24.5466	24.5235	24.5157	23.1858	23.2182	23.2143	23.2025	23.2202	23.2558	+	+	PE3_PE1;PE7_PE1	57	55	0	7.14455	0	-1.32248	-95.6307	6.6372	0.00246154	-1.30242	-71.3998	O94832	MYO1D_HUMAN	MYO1D	Unconventional myosin-Id
21.3764	21.3628	21.3674	20.9791	21.0377	20.9479	20.8616	20.9144	20.9393	+	+	PE3_PE1;PE7_PE1	10	8	0	3.85631	9.50192e-05	-0.38061	-14.2924	4.4273	0.000251638	-0.463719	-19.932	O94842	TOX4_HUMAN	TOX4	TOX high mobility group box family member 4
22.4628	22.4891	22.4808	22.6327	22.6315	22.5666	22.665	22.637	22.6319	+	+	PE3_PE1;PE7_PE1	35	35	0	2.33615	0.0019199	0.132721	5.72372	3.68934	0.000664723	0.167079	12.9602	O94855	SC24D_HUMAN	SEC24D	Protein transport protein Sec24D
19.7795	20.0891	20.143	19.9265	19.7951	19.9416	20.0911	19.8759	20.1961				7	7	0	0.401803	0.295084	-0.116179	-0.94878	0.125347	0.865982	0.0504526	0.342386	O94864	ST65G_HUMAN	SUPT7L	STAGA complex 65 subunit gamma
21.8582	21.8829	21.7302	22.1347	22.2174	22.1814	22.1053	22.1836	22.2659	+	+	PE3_PE1;PE7_PE1	26	26	0	2.583	0.00115273	0.354077	6.67915	2.26024	0.00334906	0.361175	5.45387	O94868	FCSD2_HUMAN	FCHSD2	F-BAR and double SH3 domains protein 2
24.1491	24.1071	24.1273	24.0097	24.053	23.994	24.0586	24.0714	24.0746	+	+	PE3_PE1;PE7_PE1	40	39	0	2.15193	0.00264907	-0.108915	-5.08661	1.98652	0.00522348	-0.0596479	-4.56303	O94874	UFL1_HUMAN	UFL1	E3 UFM1-protein ligase 1
18.7807	18.781	18.5848	18.8316	18.8969	18.7812	18.7076	18.9602	18.8163				9	8	0	0.758234	0.0855163	0.121076	1.64902	0.501447	0.202622	0.112563	1.14741	O94876	TMCC1_HUMAN	TMCC1	Transmembrane and coiled-coil domains protein 1
20.2054	20.0577	20.1636	20.4311	20.6152	20.3065	20.4547	20.5662	20.5679	+	+	PE3_PE1;PE7_PE1	21	21	0	1.43724	0.0156483	0.308657	3.09098	2.58954	0.00208776	0.387341	6.70619	O94880	PHF14_HUMAN	PHF14	PHD finger protein 14
22.6219	22.6346	22.5222	22.8524	22.9512	22.8957	22.9528	22.9847	22.8979	+	+	PE3_PE1;PE7_PE1	15	15	0	2.59486	0.00116035	0.306881	6.72829	2.89186	0.00130322	0.35225	8.06666	O94886	CSCL1_HUMAN	TMEM63A	CSC1-like protein 1
18.6714	19.0604	18.8579	19.1277	18.9645	19.0971	18.9393	19.1913	19.1369				16	16	0	0.746115	0.0887849	0.199878	1.62529	0.765027	0.0887607	0.225965	1.66234	O94887	FARP2_HUMAN	FARP2	FERM
21.8504	21.8947	21.7811	22.2362	22.1579	22.1498	22.1745	22.2099	22.2278	+	+	PE3_PE1;PE7_PE1	15	15	0	2.85323	0.000700718	0.339218	7.88013	3.23233	0.00100156	0.361995	9.89389	O94888	UBXN7_HUMAN	UBXN7	UBX domain-containing protein 7
21.0089	17.578	20.6477	21.4908	21.0044	21.3891	21.3384	20.8149	20.5565				6	6	1	0.636234	0.123714	1.54991	1.41098	0.447889	0.247338	1.15839	1.04128	O94889	KLH18_HUMAN	KLHL18	Kelch-like protein 18
21.2536	21.0705	21.1662	22.1131	22.178	22.1641	22.2186	22.085	22.2029	+	+	PE3_PE1;PE7_PE1	27	26	0	4.20543	0	0.988296	17.5207	3.92406	0.000383275	1.00536	14.8699	O94901	SUN1_HUMAN	SUN1	SUN domain-containing protein 1
23.8206	23.7687	23.8267	24.1325	24.1594	24.0888	24.0643	24.1189	24.0427	+	+	PE3_PE1;PE7_PE1	12	12	0	3.50837	0.000148148	0.321567	11.6513	3.11851	0.00119883	0.269964	9.2444	O94903	PLPHP_HUMAN	PLPBP	Pyridoxal phosphate homeostasis protein
24.3906	24.3492	24.3902	24.9788	24.9968	24.9965	25.0409	25.0802	25.0608	+	+	PE3_PE1;PE7_PE1	17	15	0	5.67627	0	0.614021	41.0371	5.56072	0.000472906	0.683903	38.3907	O94905	ERLN2_HUMAN	ERLIN2	Erlin-2
23.5815	23.5227	23.6083	23.7251	23.7239	23.7403	23.8064	23.7882	23.864	+	+	PE3_PE1;PE7_PE1	58	58	0	2.45021	0.00151658	0.158912	6.14976	2.72655	0.00170317	0.248667	7.2953	O94906	PRP6_HUMAN	PRPF6	Pre-mRNA-processing factor 6
18.1312	17.3939	17.7419	16.7219	16.894	17.2105	17.0724	16.5899	16.4575	+	+	PE3_PE1;PE7_PE1	4	3	1	1.4707	0.0145578	-0.813481	-3.17087	1.68224	0.00975603	-1.04904	-3.70275	O94907	DKK1_HUMAN	DKK1	Dickkopf-related protein 1
20.8312	20.8341	20.7225	20.5087	20.5251	20.5394	20.6339	20.5521	20.5286	+	+	PE3_PE1;PE7_PE1	36	36	0	2.70223	0.000984888	-0.271526	-7.18752	2.00313	0.00508627	-0.224423	-4.61367	O94913	PCF11_HUMAN	PCF11	Pre-mRNA cleavage complex 2 protein Pcf11
21.4912	21.4286	21.4429	21.2471	21.1374	21.3017	21.2455	21.262	21.2156	+	+	PE3_PE1;PE7_PE1	69	64	0	1.91349	0.00493096	-0.225487	-4.34508	3.10033	0.00118669	-0.213198	-9.14445	O94915	FRYL_HUMAN	FRYL	Protein furry homolog-like
21.1043	20.9942	21.0361	21.6982	21.766	21.8061	21.8526	21.7855	21.7635	+	+	PE3_PE1;PE7_PE1	13	13	0	4.032	0	0.711919	15.837	4.25999	0.000218679	0.755644	18.0857	O94919	ENDD1_HUMAN	ENDOD1	Endonuclease domain-containing 1 protein
21.2235	21.2242	21.1233	19.7343	19.8788	19.9636	19.8921	20.1112	20.0025	+	+	PE3_PE1;PE7_PE1	11	9	0	4.23149	0	-1.33145	-17.7884	4.11267	0.000325773	-1.18837	-16.5996	O94921	CDK14_HUMAN	CDK14	Cyclin-dependent kinase 14
24.4613	24.4345	24.5395	24.7918	24.828	24.8019	24.9305	24.8706	24.8706	+	+	PE3_PE1;PE7_PE1	23	23	0	3.22932	0.000326326	0.328773	9.87617	3.41862	0.000922896	0.412134	11.0498	O94925	GLSK_HUMAN	GLS	Glutaminase kidney isoform
20.9665	21.0685	21.0617	20.8301	20.8891	20.9145	20.8547	20.8509	20.8723	+	+	PE3_PE1;PE7_PE1	20	20	0	1.69352	0.00850372	-0.154343	-3.73251	2.17134	0.00398488	-0.172956	-5.15095	O94927	HAUS5_HUMAN	HAUS5	HAUS augmin-like complex subunit 5
19.5842	19.9768	19.8947	19.782	18.988	19.6759	19.7555	19.232	17.6132				5	5	1	0.537903	0.173577	-0.336586	-1.21904	0.656851	0.121219	-0.951644	-1.45113	O94941	RNF37_HUMAN	UBOX5	RING finger protein 37
17.9423	17.8764	18.2536	18.3616	18.534	18.0908	18.0223	18.0597	18.2998				7	7	0	0.811781	0.0728177	0.304675	1.75426	0.286816	0.537015	0.103167	0.710481	O94952	FBX21_HUMAN	FBXO21	F-box only protein 21
18.629	19.8048	19.2212	19.1435	19.3509	19.1856	18.9783	19.2793	19.853				5	5	0	0.00795827	0.992717	0.00835991	0.0242133	0.131237	0.858635	0.151846	0.356895	O94953	KDM4B_HUMAN	KDM4B	Lysine-specific demethylase 4B
21.4757	21.5369	21.4302	21.6474	21.5919	21.599	21.6226	21.6295	21.6121	+	+	PE3_PE1;PE7_PE1	37	37	0	1.68577	0.00864204	0.131793	3.71205	1.95938	0.00544456	0.14047	4.48112	O94966	UBP19_HUMAN	USP19	Ubiquitin carboxyl-terminal hydrolase 19
23.293	23.2363	23.317	23.9515	24.0595	23.9481	23.842	23.9765	23.8944	+	+	PE3_PE1;PE7_PE1	26	26	0	4.06181	0	0.704238	16.1148	3.76678	0.000615144	0.622178	13.5625	O94973	AP2A2_HUMAN	AP2A2	AP-2 complex subunit alpha-2
25.4458	25.3931	25.3815	25.2371	25.2277	25.2263	25.2505	25.2982	25.2536	+	+	PE3_PE1;PE7_PE1	44	43	0	3.03257	0.000383297	-0.176429	-8.78048	2.28874	0.00324641	-0.139397	-5.55397	O94979	SC31A_HUMAN	SEC31A	Protein transport protein Sec31A
17.7508	21.1103	21.4751	23.3415	23.1635	23.2487	23.263	23.0886	23.0983	+	+	PE3_PE1;PE7_PE1	20	20	1	1.2424	0.0242657	3.13917	2.64588	1.20317	0.028474	3.03789	2.56001	O94985	CSTN1_HUMAN	CLSTN1	Calsyntenin-1
20.1202	20.0383	20.048	19.7789	19.8752	19.7949	20.0729	20.033	19.9984	+		PE3_PE1	27	27	0	2.51456	0.00138037	-0.252556	-6.40166	0.433679	0.262017	-0.034064	-1.01289	O94986	CE152_HUMAN	CEP152	Centrosomal protein of 152 kDa
22.4788	22.418	22.3126	22.694	22.6284	22.6292	22.5858	22.459	22.5609	+	+	PE3_PE1;PE7_PE1	8	8	0	2.01544	0.00370249	0.247416	4.6515	0.997117	0.0475139	0.132118	2.12595	O94992	HEXI1_HUMAN	HEXIM1	Protein HEXIM1
22.338	22.7301	22.1888	22.4882	22.4714	22.5936	22.3742	22.4723	22.3437				5	5	0	0.233885	0.687507	0.0987848	0.595444	0.045817	0.957359	-0.0222473	-0.133997	O95059	RPP14_HUMAN	RPP14	Ribonuclease P protein subunit p14
21.7256	21.6468	21.5844	21.504	21.7762	21.684	21.9847	21.879	21.7981		+	PE7_PE1	11	10	0	0.00898205	0.99148	0.00245031	0.027297	1.59158	0.0116631	0.235007	3.46885	O95067	CCNB2_HUMAN	CCNB2	G2/mitotic-specific cyclin-B2
21.5584	21.6222	21.7	21.39	21.432	21.6237	21.2891	21.4644	21.5078		+	PE7_PE1	4	4	0	0.810508	0.0729929	-0.144969	-1.75174	1.23696	0.0264905	-0.206414	-2.63392	O95070	YIF1A_HUMAN	YIF1A	Protein YIF1A
23.4631	23.3644	23.307	23.3472	23.2962	23.3196	23.3813	23.4343	23.36				74	74	0	0.524495	0.181394	-0.0571613	-1.19274	0.0971706	0.899118	0.0137482	0.271392	O95071	UBR5_HUMAN	UBR5	E3 ubiquitin-protein ligase UBR5
19.9164	19.7704	19.673	20.8876	21.0239	20.8083	21.1415	21.1556	21.1465	+	+	PE3_PE1;PE7_PE1	8	8	0	3.53368	0.000151127	1.12	11.8264	4.36377	0.000240903	1.36128	19.21	O95081	AGFG2_HUMAN	AGFG2	Arf-GAP domain and FG repeat-containing protein 2
21.1233	21.1586	21.2453	20.4064	20.3942	20.3867	20.5191	20.4695	20.758	+	+	PE3_PE1;PE7_PE1	14	14	0	4.53847	0	-0.779975	-21.2599	2.45614	0.00257455	-0.593504	-6.17264	O95104	SCAF4_HUMAN	SCAF4	SR-related and CTD-associated factor 4
20.0012	19.7938	19.6934	19.682	19.832	19.6567	19.7093	19.9167	19.9003				4	4	0	0.427594	0.265615	-0.10593	-1.0007	0.0380562	0.963401	0.0126127	0.112157	O95136	S1PR2_HUMAN	S1PR2	Sphingosine 1-phosphate receptor 2
23.8152	23.8959	23.943	23.0144	22.9729	22.9633	22.9588	22.9797	23.0203	+	+	PE3_PE1;PE7_PE1	6	6	0	4.61779	0	-0.901185	-22.2603	4.57101	0.000147465	-0.898444	-21.6648	O95139	NDUB6_HUMAN	NDUFB6	NADH dehydrogenase [ubiquinone] 1 beta subcomplex subunit 6
21.8506	21.8687	21.8779	22.1016	22.1331	22.1153	21.9541	22.0535	21.9925	+	+	PE3_PE1;PE7_PE1	31	29	0	4.49018	0	0.25096	20.6727	1.95569	0.00549295	0.134327	4.47006	O95140	MFN2_HUMAN	MFN2	Mitofusin-2
21.393	21.3321	21.3058	21.0787	20.8228	20.5045	21.0219	20.8637	21.0414	+	+	PE3_PE1;PE7_PE1	6	6	0	1.49225	0.0139588	-0.541648	-3.22288	2.3958	0.00291423	-0.367997	-5.94338	O95149	SPN1_HUMAN	SNUPN	Snurportin-1
21.8203	21.6883	21.6312	21.6296	21.5695	21.5434	21.6643	21.7994	21.6937	+		PE3_PE1	30	30	0	1.01	0.0428197	-0.132431	-2.15235	0.0283986	0.972211	0.00586573	0.0845229	O95155	UBE4B_HUMAN	UBE4B	Ubiquitin conjugation factor E4 B
21.1809	21.2483	21.2544	21.5882	21.6162	21.5304	21.7601	21.7826	21.6529	+	+	PE3_PE1;PE7_PE1	9	9	0	3.27469	0.000334874	0.350439	10.1463	3.3884	0.000901149	0.504039	10.8541	O95159	ZFPL1_HUMAN	ZFPL1	Zinc finger protein-like 1
24.3985	24.3906	24.4206	24.3729	24.4007	24.3428	24.3549	24.3809	24.3487		+	PE7_PE1	52	52	0	0.752841	0.0870003	-0.0311171	-1.63846	1.45171	0.015661	-0.0416972	-3.12541	O95163	ELP1_HUMAN	ELP1	Elongator complex protein 1
21.0039	20.2971	20.515	20.5591	20.6461	20.0407	20.9528	20.8399	20.6736				3	2	0	0.270068	0.588728	-0.190053	-0.674536	0.410805	0.288532	0.216744	0.966953	O95166	GBRAP_HUMAN	GABARAP	Gamma-aminobutyric acid receptor-associated protein
24.2094	24.044	24.1968	23.4839	23.6096	23.5706	23.435	23.5286	23.4954	+	+	PE3_PE1;PE7_PE1	3	3	0	3.10663	0.000344285	-0.595381	-9.17896	3.42547	0.00092836	-0.663755	-11.0947	O95167	NDUA3_HUMAN	NDUFA3	NADH dehydrogenase [ubiquinone] 1 alpha subcomplex subunit 3
25.4648	25.4172	25.4914	23.7437	23.8481	23.8236	23.959	23.8936	23.9303	+	+	PE3_PE1;PE7_PE1	10	10	0	5.76495	0	-1.65264	-43.1904	6.12538	0.00102128	-1.53014	-53.165	O95168	NDUB4_HUMAN	NDUFB4	NADH dehydrogenase [ubiquinone] 1 beta subcomplex subunit 4
23.4331	23.4924	23.531	21.6976	21.8597	21.8692	21.8367	21.7288	21.701	+	+	PE3_PE1;PE7_PE1	4	4	0	4.93912	0	-1.67664	-26.811	5.37259	0.000367816	-1.73001	-34.4409	O95169	NDUB8_HUMAN	NDUFB8	NADH dehydrogenase [ubiquinone] 1 beta subcomplex subunit 8
22.4764	22.4384	22.4757	20.6318	20.5883	20.4958	20.721	20.7783	20.335	+	+	PE3_PE1;PE7_PE1	2	2	0	5.83605	0	-1.8915	-44.9979	3.72704	0.000685714	-1.85205	-13.2501	O95178	NDUB2_HUMAN	NDUFB2	NADH dehydrogenase [ubiquinone] 1 beta subcomplex subunit 2
23.8579	23.8261	23.8612	22.3389	22.2278	22.321	22.3532	22.4674	22.4883	+	+	PE3_PE1;PE7_PE1	11	11	0	5.75189	0	-1.55249	-42.8664	5.27243	0.000322148	-1.4121	-32.5059	O95182	NDUA7_HUMAN	NDUFA7	NADH dehydrogenase [ubiquinone] 1 alpha subcomplex subunit 7
24.1088	24.5027	24.2416	24.2546	24.4972	24.2981	23.8787	24.0087	23.9289		+	PE7_PE1	4	4	0	0.181443	0.791574	0.0656325	0.47662	1.32863	0.0209562	-0.345572	-2.83887	O95183	VAMP5_HUMAN	VAMP5	Vesicle-associated membrane protein 5
26.2288	26.2362	26.1967	26.5046	26.5933	26.5189	26.6665	26.707	26.611	+	+	PE3_PE1;PE7_PE1	8	8	0	3.34717	0.000184648	0.318391	10.5922	3.88434	0.000371308	0.440938	14.5286	O95197	RTN3_HUMAN	RTN3	Reticulon-3
24.5094	24.5247	24.5215	24.5585	24.5674	24.5205	24.5565	24.6047	24.5725		+	PE7_PE1	36	35	0	0.935663	0.051877	0.0302525	2.00112	1.78416	0.00781986	0.0593484	3.97734	O95202	LETM1_HUMAN	LETM1	Mitochondrial proton/calcium exchanger protein
18.9239	18.713	18.6924	19.8056	19.4703	19.6626	19.2906	19.5555	19.2312	+	+	PE3_PE1;PE7_PE1	6	5	0	2.68773	0.000976965	0.869778	7.12394	2.02942	0.00482623	0.582696	4.69471	O95208	EPN2_HUMAN	EPN2	Epsin-2
22.1645	22.1352	22.1981	22.9844	23.046	23.0441	23.0084	22.9441	22.9341	+	+	PE3_PE1;PE7_PE1	19	19	0	5.22342	0	0.858895	31.5987	4.94872	0.00021573	0.796244	26.9603	O95210	STBD1_HUMAN	STBD1	Starch-binding domain-containing protein 1
16.4917	19.2157	18.9489	19.4342	19.3725	19.5106	19.0368	19.1174	19.3098				2	2	0	0.633747	0.124907	1.22035	1.40613	0.464768	0.231765	0.935915	1.07486	O95214	LERL1_HUMAN	LEPROTL1	Leptin receptor overlapping transcript-like 1
23.2125	23.1582	23.3012	23.0722	23.1154	23.1695	23.0972	23.1008	23.0205	+	+	PE3_PE1;PE7_PE1	15	15	0	0.977054	0.0463043	-0.104923	-2.08499	1.42815	0.0165607	-0.151154	-3.06947	O95218	ZRAB2_HUMAN	ZRANB2	Zinc finger Ran-binding domain-containing protein 2
21.7307	21.6982	21.7399	21.4831	21.4941	21.5031	21.6397	21.562	21.5731	+	+	PE3_PE1;PE7_PE1	20	20	0	4.10195	0	-0.22949	-16.4962	2.06366	0.00457936	-0.131375	-4.80184	O95219	SNX4_HUMAN	SNX4	Sorting nexin-4
20.9358	20.7792	20.9405	20.7652	20.6865	20.7718	20.8156	20.9294	20.8079	+		PE3_PE1	10	10	0	1.13461	0.0316464	-0.143957	-2.41259	0.199486	0.753494	-0.0341803	-0.518134	O95229	ZWINT_HUMAN	ZWINT	ZW10 interactor
24.0672	24.081	24.037	23.7065	23.7531	23.8015	23.8041	23.8438	23.8765	+	+	PE3_PE1;PE7_PE1	19	19	0	3.27403	0.000334702	-0.308058	-10.1423	3.06217	0.00116312	-0.220292	-8.93781	O95232	LC7L3_HUMAN	LUC7L3	Luc7-like protein 3
22.7328	22.8081	22.6872	22.1555	22.2746	22.2725	22.334	22.3106	22.1891	+	+	PE3_PE1;PE7_PE1	26	26	0	3.18638	0.000317275	-0.508535	-9.62676	2.90727	0.00131366	-0.464836	-8.1422	O95235	KI20A_HUMAN	KIF20A	Kinesin-like protein KIF20A
21.0462	20.9805	21.1834	21.0072	21.1171	21.1423	21.0132	20.8196	21.0778				14	14	0	0.0923447	0.907863	0.0188332	0.25895	0.437095	0.258321	-0.0998599	-1.01973	O95236	APOL3_HUMAN	APOL3	Apolipoprotein L3
21.5791	21.5466	21.5651	21.4917	21.4254	21.3919	21.4607	21.5793	21.4975	+		PE3_PE1	45	30	0	1.839	0.00584038	-0.12727	-4.13052	0.63401	0.129745	-0.0510686	-1.40665	O95239	KIF4A_HUMAN	KIF4A	Chromosome-associated kinesin KIF4A
20.5862	20.6347	20.7273	20.1245	19.8544	19.9016	20.0127	20.0911	19.9929	+	+	PE3_PE1;PE7_PE1	20	20	0	2.75214	0.000913552	-0.68921	-7.41022	3.56901	0.000759124	-0.617148	-12.0751	O95243	MBD4_HUMAN	MBD4	Methyl-CpG-binding domain protein 4
22.0068	21.9153	22.0015	21.0788	21.1434	21.1735	21.1086	21.0375	21.14	+	+	PE3_PE1;PE7_PE1	41	40	0	4.4902	0	-0.842628	-20.6729	4.49424	0.000136752	-0.87916	-20.7214	O95248	MTMR5_HUMAN	SBF1	Myotubularin-related protein 5
23.073	23.2536	23.2583	22.8151	22.8949	22.851	22.7965	22.8326	22.9063	+	+	PE3_PE1;PE7_PE1	13	13	0	2.1963	0.00248553	-0.341331	-5.23461	2.14675	0.00410259	-0.349852	-5.06956	O95249	GOSR1_HUMAN	GOSR1	Golgi SNAP receptor complex member 1
22.4068	22.44	22.4208	21.934	21.7884	22.025	22.0219	21.922	21.9726	+	+	PE3_PE1;PE7_PE1	14	13	0	2.72334	0.000902648	-0.506716	-7.28098	3.91787	0.000381613	-0.450393	-14.8162	O95251	KAT7_HUMAN	KAT7	Histone acetyltransferase KAT7
19.4753	17.5342	19.7517	20.8234	20.8043	20.8254	20.9433	20.8321	20.9261	+	+	PE3_PE1;PE7_PE1	6	4	1	1.27554	0.0223568	1.8973	2.71935	1.32678	0.0210358	1.98008	2.83466	O95258	UCP5_HUMAN	SLC25A14	Brain mitochondrial carrier protein 1
20.5741	20.6502	20.6041	20.2539	20.4933	20.4078	20.4069	20.3391	20.5337	+	+	PE3_PE1;PE7_PE1	12	12	0	1.42237	0.0162653	-0.224465	-3.05583	1.39389	0.0176497	-0.182894	-2.98909	O95260	ATE1_HUMAN	ATE1	Arginyl-tRNA--protein transferase 1
22.4803	22.4581	22.4849	22.2884	22.39	22.1491	22.3509	22.3681	22.3758	+	+	PE3_PE1;PE7_PE1	7	7	0	1.32253	0.0199918	-0.198601	-2.82503	3.22806	0.000998446	-0.109496	-9.8688	O95273	CCDB1_HUMAN	CCNDBP1	Cyclin-D1-binding protein 1
23.7355	23.6567	23.8156	24.5379	24.5749	24.4743	24.5795	24.623	24.6181	+	+	PE3_PE1;PE7_PE1	16	16	0	3.8879	0	0.793086	14.5589	4.26901	0.000221198	0.870937	18.1808	O95292	VAPB_HUMAN	VAPB	Vesicle-associated membrane protein-associated protein B/C
22.5311	22.5472	22.6033	22.0318	22.0061	22.0489	21.8595	21.9366	22.0277	+	+	PE3_PE1;PE7_PE1	9	9	0	4.52757	0	-0.531616	-21.1259	3.50398	0.000860919	-0.619256	-11.6211	O95295	SNAPN_HUMAN	SNAPIN	SNARE-associated protein Snapin
22.7351	22.8021	22.7707	22.8736	22.9948	22.814	22.9472	22.9251	22.8848	+	+	PE3_PE1;PE7_PE1	6	6	0	1.03588	0.0404626	0.124811	2.20567	2.30973	0.00320493	0.149739	5.6286	O95297	MPZL1_HUMAN	MPZL1	Myelin protein zero-like protein 1
24.8716	24.8731	24.9614	24.0174	24.0394	24.0564	24.1266	24.102	24.1346	+	+	PE3_PE1;PE7_PE1	8	4	0	4.96513	0	-0.864286	-27.2173	4.81734	0.000192385	-0.780993	-24.9871	O95298	NDUC2_HUMAN	NDUFC2	NADH dehydrogenase [ubiquinone] 1 subunit C2
24.8038	24.7399	24.8138	23.589	23.5567	23.5468	23.6276	23.6215	23.6594	+	+	PE3_PE1;PE7_PE1	13	13	0	5.88279	0	-1.22161	-46.2272	5.80845	0.000648649	-1.14964	-44.2875	O95299	NDUAA_HUMAN	NDUFA10	NADH dehydrogenase [ubiquinone] 1 alpha subcomplex subunit 10
24.4325	24.435	24.5103	23.639	23.8007	23.6869	23.7857	23.8811	23.7944	+	+	PE3_PE1;PE7_PE1	14	12	0	3.79807	9.09091e-05	-0.750408	-13.8134	4.05802	0.000429268	-0.638872	-16.0792	O95319	CELF2_HUMAN	CELF2	CUGBP Elav-like family member 2
23.2859	23.2243	23.2183	23.5741	23.7033	23.5187	23.5122	23.6249	23.5617	+	+	PE3_PE1;PE7_PE1	11	11	0	2.42515	0.00152975	0.355879	6.05398	2.93267	0.00133906	0.323435	8.26805	O95336	6PGL_HUMAN	PGLS	6-phosphogluconolactonase
20.97	20.8239	20.8165	20.1621	20.2265	20.1061	20.2381	20.2962	20.075	+	+	PE3_PE1;PE7_PE1	16	16	0	3.49904	0.000147181	-0.705249	-11.5873	2.88689	0.00129887	-0.667058	-8.04244	O95340	PAPS2_HUMAN	PAPSS2	Bifunctional 3'-phosphoadenosine 5'-phosphosulfate synthase 2
25.1181	25.0883	25.1132	24.7086	24.7362	24.6868	24.8173	24.829	24.8026	+	+	PE3_PE1;PE7_PE1	70	70	0	4.69507	0	-0.396018	-23.2796	4.76433	0.000178108	-0.290242	-24.2322	O95347	SMC2_HUMAN	SMC2	Structural maintenance of chromosomes protein 2
23.3222	23.2233	23.1583	23.3395	23.3207	23.4019	23.3057	23.4323	23.318	+		PE3_PE1	20	20	0	1.04745	0.0393205	0.119452	2.22962	0.875965	0.0664293	0.117402	1.88146	O95352	ATG7_HUMAN	ATG7	Ubiquitin-like modifier-activating enzyme ATG7
21.3328	21.1787	21.0933	21.968	22.0962	21.9893	22.0722	22.0858	21.8817	+	+	PE3_PE1;PE7_PE1	16	16	0	3.27304	0.000334188	0.816229	10.1364	2.96649	0.00136787	0.811647	8.43841	O95363	SYFM_HUMAN	FARS2	Phenylalanine--tRNA ligase
21.0272	21.3601	20.9828	21.0197	20.9371	20.8204	20.6036	21.0411	20.7599				8	8	0	0.678469	0.10822	-0.197641	-1.49324	0.8557	0.0697873	-0.321828	-1.84115	O95365	ZBT7A_HUMAN	ZBTB7A	Zinc finger and BTB domain-containing protein 7A
24.7824	24.8282	24.8575	24.6536	24.6749	24.6518	24.5357	24.5949	24.6626	+	+	PE3_PE1;PE7_PE1	7	7	0	2.66945	0.000968818	-0.162586	-7.0445	2.20679	0.00361439	-0.224963	-5.27012	O95372	LYPA2_HUMAN	LYPLA2	Acyl-protein thioesterase 2
25.4829	25.5007	25.4827	25.4861	25.4733	25.5061	25.5015	25.486	25.474				33	32	0	0.0077478	0.992813	-0.000265121	-0.0235784	0.054899	0.947557	-0.00158246	-0.159163	O95373	IPO7_HUMAN	IPO7	Importin-7
22.0725	22.1364	22.162	22.4501	22.5212	22.4975	22.4065	22.4039	22.3883	+	+	PE3_PE1;PE7_PE1	19	19	0	3.38207	0.000188493	0.365953	10.8134	3.27372	0.000903364	0.27597	10.1404	O95376	ARI2_HUMAN	ARIH2	E3 ubiquitin-protein ligase ARIH2
20.521	20.6674	20.7402	21.0354	20.802	20.9586	20.663	20.8721	20.8599	+		PE3_PE1	4	4	0	1.42799	0.0160085	0.289066	3.06909	0.76507	0.088776	0.155439	1.66242	O95379	TFIP8_HUMAN	TNFAIP8	Tumor necrosis factor alpha-induced protein 8
22.1103	22.1392	22.1101	21.7455	21.6984	21.7669	21.8598	21.8661	21.8277	+	+	PE3_PE1;PE7_PE1	16	16	0	4.16149	0	-0.382934	-17.0783	4.20851	0.000345733	-0.26867	-17.5521	O95391	SLU7_HUMAN	SLU7	Pre-mRNA-splicing factor SLU7
23.4118	23.4757	23.4343	23.5762	23.6198	23.6824	23.6081	23.5024	23.6171	+	+	PE3_PE1;PE7_PE1	24	24	0	2.16981	0.00254885	0.185525	5.14586	1.51314	0.0134271	0.135282	3.27377	O95394	AGM1_HUMAN	PGM3	Phosphoacetylglucosamine mutase
21.4829	21.1969	21.434	21.6786	21.7049	21.6856	21.73	21.8297	21.751	+	+	PE3_PE1;PE7_PE1	25	25	0	1.63954	0.00956347	0.31844	3.59141	1.88865	0.00627773	0.398996	4.27268	O95396	MOCS3_HUMAN	MOCS3	Adenylyltransferase and sulfurtransferase MOCS3
27.2451	27.1397	27.1687	27.2237	27.2164	27.2598	27.2194	27.1968	27.2114				13	13	0	0.645708	0.120179	0.0488402	1.42943	0.314653	0.459873	0.0247027	0.769422	O95400	CD2B2_HUMAN	CD2BP2	CD2 antigen cytoplasmic tail-binding protein 2
21.6828	21.5108	21.5543	21.6296	21.869	21.6568	21.6421	21.8976	21.7132				12	12	0	0.672909	0.110113	0.135804	1.48241	0.850101	0.0707788	0.168336	1.83004	O95402	MED26_HUMAN	MED26	Mediator of RNA polymerase II transcription subunit 26
20.9975	21.1004	20.8877	20.4423	20.5683	20.4615	20.4459	20.4143	20.2494	+	+	PE3_PE1;PE7_PE1	6	6	0	2.6416	0.000987513	-0.504462	-6.92496	2.71148	0.00173591	-0.625315	-7.22832	O95427	PIGN_HUMAN	PIGN	GPI ethanolamine phosphate transferase 1
20.0631	20.2408	20.3862	19.621	19.9184	19.8683	19.7984	19.7264	19.6488	+	+	PE3_PE1;PE7_PE1	5	5	0	1.50812	0.013288	-0.427471	-3.2615	2.09765	0.0043109	-0.505474	-4.91002	O95429	BAG4_HUMAN	BAG4	BAG family molecular chaperone regulator 4
25.0022	24.9026	24.8768	24.5446	24.5136	24.4838	24.4693	24.535	24.5432	+	+	PE3_PE1;PE7_PE1	19	19	0	3.2202	0.000324378	-0.41319	-9.82273	3.10681	0.00119013	-0.411353	-9.17998	O95433	AHSA1_HUMAN	AHSA1	Activator of 90 kDa heat shock protein ATPase homolog 1
22.009	21.9063	21.9444	22.6469	22.7709	22.4688	23.0918	23.0347	22.5493	+	+	PE3_PE1;PE7_PE1	3	3	0	2.72608	0.000903997	0.675654	7.29318	2.23709	0.00334129	0.938695	5.37368	O95445	APOM_HUMAN	APOM	Apolipoprotein M
26.8271	26.704	26.7344	27.2629	27.3522	27.3127	27.267	27.3075	27.279	+	+	PE3_PE1;PE7_PE1	28	28	0	3.59682	0.000157261	0.554089	12.2743	3.77232	0.000617071	0.529348	13.6066	O95453	PARN_HUMAN	PARN	Poly(A)-specific ribonuclease PARN
24.1671	24.4641	24.3129	24.7137	24.8038	24.793	24.832	24.9126	24.9466	+	+	PE3_PE1;PE7_PE1	10	10	0	2.13828	0.00265886	0.455437	5.04176	2.4923	0.00251166	0.582363	6.31357	O95456	PSMG1_HUMAN	PSMG1	Proteasome assembly chaperone 1
25.0909	25.1348	25.1108	25.2889	25.3118	25.2945	25.194	25.2652	25.2531	+	+	PE3_PE1;PE7_PE1	57	51	0	3.67998	8.33333e-05	0.186277	12.8892	2.10565	0.00426116	0.125291	4.93573	O95466	FMNL1_HUMAN	FMNL1	Formin-like protein 1
21.9617	22.0288	21.8109	22.4907	22.5237	22.4972	22.4648	22.4569	22.5145	+	+	PE3_PE1;PE7_PE1	19	19	0	3.02539	0.000381452	0.570072	8.74269	2.90812	0.00131532	0.544946	8.14639	O95470	SGPL1_HUMAN	SGPL1	Sphingosine-1-phosphate lyase 1
17.814	17.2584	17.0279	17.6147	18.0603	17.3981	18.0497	17.3896	17.8196				6	6	0	0.460631	0.230993	0.324273	1.06664	0.566223	0.162231	0.38624	1.27446	O95476	CNEP1_HUMAN	CTDNEP1	CTD nuclear envelope phosphatase 1
23.0828	22.8789	23.0647	23.0694	23.0474	23.1575	22.8543	22.9261	22.8709				8	8	0	0.491308	0.204691	0.0826562	1.12741	0.845722	0.0718802	-0.125051	-1.82136	O95478	NSA2_HUMAN	NSA2	Ribosome biogenesis protein NSA2 homolog
20.9948	20.9893	20.927	23.3142	23.3175	23.3444	23.361	23.4072	23.3264	+	+	PE3_PE1;PE7_PE1	36	36	0	7.20628	0	2.35502	99.0908	6.72092	0.00259459	2.39454	74.9271	O95479	G6PE_HUMAN	H6PD	GDH/6PGL endoplasmic bifunctional protein
23.1202	23.1824	23.0723	22.9146	22.9235	22.8972	22.7422	22.9058	22.8264	+	+	PE3_PE1;PE7_PE1	29	27	0	2.53993	0.001314	-0.213191	-6.50334	2.20623	0.00364044	-0.300179	-5.26819	O95486	SC24A_HUMAN	SEC24A	Protein transport protein Sec24A
22.233	22.2638	22.2514	22.1588	22.2467	22.1413	22.2829	22.3592	22.2608				22	22	0	0.927464	0.0532085	-0.0671062	-1.9846	0.761968	0.0896698	0.0515645	1.65634	O95487	SC24B_HUMAN	SEC24B	Protein transport protein Sec24B
23.1618	23.5542	22.3168	24.0128	23.8405	23.8002	22.9312	24.0102	23.3497	+		PE3_PE1	7	7	0	1.10765	0.0337729	0.873562	2.3555	0.363588	0.358851	0.419446	0.870967	O95503	CBX6_HUMAN	CBX6	Chromobox protein homolog 6
20.6972	20.6087	20.668	21.3202	21.2219	21.2336	21.1739	21.2934	21	+	+	PE3_PE1;PE7_PE1	12	12	0	3.92019	0	0.600585	14.8363	2.29843	0.00318432	0.497773	5.58833	O95544	NADK_HUMAN	NADK	NAD kinase
22.2427	22.2224	22.1126	22.537	22.6317	22.6187	22.6041	22.6833	22.5904	+	+	PE3_PE1;PE7_PE1	9	9	0	2.88752	0.000622114	0.403248	8.0455	3.02092	0.00132481	0.433358	8.71925	O95551	TYDP2_HUMAN	TDP2	Tyrosyl-DNA phosphodiesterase 2
20.9808	21.1084	21.0163	21.1294	21.3107	21.2799	21.1376	21.2378	21.3968	+	+	PE3_PE1;PE7_PE1	2	2	0	1.40913	0.0166954	0.204802	3.02472	1.23509	0.0265469	0.222182	2.62981	O95562	SFT2B_HUMAN	SFT2D2	Vesicle transport protein SFT2B
21.3817	21.1585	21.0603	21.7098	21.7878	21.7758	21.5572	21.3389	21.5328	+	+	PE3_PE1;PE7_PE1	5	5	0	2.32446	0.00197222	0.557667	5.68148	1.10472	0.0363025	0.276153	2.34931	O95563	MPC2_HUMAN	MPC2	Mitochondrial pyruvate carrier 2
20.9986	21.7515	21.5721	21.4501	21.1856	20.8056	21.2428	20.8925	21.0074				4	4	0	0.426257	0.267289	-0.293603	-0.998021	0.721236	0.100127	-0.393169	-1.57666	O95568	MET18_HUMAN	METTL18	Histidine protein methyltransferase 1 homolog
22.8697	22.8121	22.8908	22.999	23.0937	23.11	23.1379	23.1918	23.1443	+	+	PE3_PE1;PE7_PE1	10	10	0	2.13122	0.0027729	0.210033	5.01866	3.30899	0.000853566	0.300488	10.355	O95571	ETHE1_HUMAN	ETHE1	Persulfide dioxygenase ETHE1
22.2104	22.1051	22.2529	22.5102	22.5703	22.5759	22.6117	22.61	22.5557	+	+	PE3_PE1;PE7_PE1	23	23	0	2.7596	0.000920152	0.362607	7.44399	2.97078	0.00137148	0.40299	8.4602	O95573	ACSL3_HUMAN	ACSL3	Fatty acid CoA ligase Acsl3
21.8638	22.012	21.8922	22.6424	22.6199	22.6327	22.6893	22.6633	22.74	+	+	PE3_PE1;PE7_PE1	66	65	0	3.98936	0	0.708995	15.4479	3.9709	0.000398912	0.774843	15.2823	O95602	RPA1_HUMAN	POLR1A	DNA-directed RNA polymerase I subunit RPA1
22.0977	21.9253	21.8786	21.993	21.8778	21.8511	21.9401	21.9226	22.0058				91	91	0	0.306754	0.480017	-0.059934	-0.752794	0.0535086	0.948956	-0.0110741	-0.155336	O95613	PCNT_HUMAN	PCNT	Pericentrin
21.1792	21.1424	21.0452	20.6098	20.7568	20.4236	20.6407	20.802	20.6197	+	+	PE3_PE1;PE7_PE1	11	11	0	2.13664	0.00265441	-0.525533	-5.03639	2.46413	0.00250614	-0.434804	-6.20356	O95619	YETS4_HUMAN	YEATS4	YEATS domain-containing protein 4
18.6893	18.9995	18.521	18.6105	18.7605	18.5717	18.9773	18.7952	19.1013				4	4	0	0.230348	0.695698	-0.0890172	-0.587599	0.59667	0.14633	0.221347	1.33389	O95620	DUS4L_HUMAN	DUS4L	tRNA-dihydrouridine(20a/20b) synthase [NAD(P)+]-like
22.8948	22.9487	22.985	22.8878	22.9134	22.8971	23.0371	23.0141	22.8006				26	26	0	0.729534	0.0932674	-0.0434043	-1.59287	0.0327463	0.968057	0.0077343	0.097028	O95625	ZBT11_HUMAN	ZBTB11	Zinc finger and BTB domain-containing protein 11
21.1923	21.3673	21.1156	21.6599	21.5716	21.6418	21.7161	21.7248	21.5863	+	+	PE3_PE1;PE7_PE1	16	16	0	2.13902	0.00266034	0.399366	5.04418	2.18206	0.00388558	0.450679	5.18677	O95628	CNOT4_HUMAN	CNOT4	CCR4-NOT transcription complex subunit 4
22.8428	22.8355	22.8112	22.831	22.8635	22.8275	22.7782	22.8613	22.8545				18	18	0	0.292902	0.519643	0.0107905	0.723451	0.0172311	0.982691	0.00146802	0.0518949	O95630	STABP_HUMAN	STAMBP	STAM-binding protein
22.4976	22.3431	22.4366	22.1844	22.2484	22.2294	22.1661	22.2598	22.3298	+	+	PE3_PE1;PE7_PE1	16	15	0	1.86493	0.00555345	-0.20504	-4.20435	1.24938	0.025655	-0.173861	-2.66129	O95639	CPSF4_HUMAN	CPSF4	Cleavage and polyadenylation specificity factor subunit 4
21.7132	21.6254	21.7862	22.2851	22.2557	22.2419	22.375	22.2488	22.3384	+	+	PE3_PE1;PE7_PE1	18	18	0	3.48121	0.000145284	0.552637	11.466	3.29312	0.000913607	0.612467	10.2579	O95671	ASML_HUMAN	ASMTL	Probable bifunctional dTTP/UTP pyrophosphatase/methyltransferase protein
22.5663	22.5311	22.4509	21.6029	21.6038	21.632	21.6118	21.6515	21.5275	+	+	PE3_PE1;PE7_PE1	9	8	0	4.85153	0	-0.903205	-25.4864	4.28782	0.000225352	-0.919182	-18.3807	O95674	CDS2_HUMAN	CDS2	Phosphatidate cytidylyltransferase 2
21.921	21.9209	21.8332	22.2425	22.0777	22.0929	22.0974	22.3032	22.1851	+	+	PE3_PE1;PE7_PE1	10	10	0	1.82422	0.00603981	0.245995	4.08884	1.98904	0.00522911	0.303558	4.57068	O95684	CEP43_HUMAN	CEP43	Centrosomal protein 43
21.0648	21.1894	21.1823	21.5505	21.6877	21.5559	21.5621	21.552	21.6089	+	+	PE3_PE1;PE7_PE1	14	14	0	2.77051	0.000876817	0.452471	7.49371	3.20504	0.00105059	0.428799	9.73439	O95685	PPR3D_HUMAN	PPP1R3D	Protein phosphatase 1 regulatory subunit 3D
20.418	20.1041	20.1914	20.2323	20.2245	20.2936	19.8926	20.4768	20.4626				16	15	0	0.0437417	0.958918	0.0123119	0.128188	0.0643176	0.936345	0.0395438	0.18484	O95696	BRD1_HUMAN	BRD1	Bromodomain-containing protein 1
21.726	21.7686	21.624	21.7516	21.8177	21.7887	21.8724	21.812	21.8158		+	PE7_PE1	8	8	0	0.783989	0.0790478	0.0798162	1.69955	1.26678	0.0248359	0.127209	2.69984	O95707	RPP29_HUMAN	POP4	Ribonuclease P protein subunit p29
20.8351	20.9602	20.8679	21.2913	21.2579	21.3143	21.3786	21.1668	21.2905	+	+	PE3_PE1;PE7_PE1	75	61	0	3.21411	0.000323252	0.400113	9.78714	2.25424	0.00337349	0.39094	5.433	O95714	HERC2_HUMAN	HERC2	E3 ubiquitin-protein ligase HERC2
24.2472	24.067	24.222	24.9082	24.9548	24.9118	24.8768	24.8903	24.9076	+	+	PE3_PE1;PE7_PE1	8	5	0	3.66797	8.26667e-05	0.74623	12.7986	3.627	0.000720946	0.712854	12.4942	O95716	RAB3D_HUMAN	RAB3D	Ras-related protein Rab-3D
23.2639	23.2311	23.2629	23.6224	23.6264	23.6406	23.6146	23.6893	23.7029	+	+	PE3_PE1;PE7_PE1	13	13	0	5.20029	0	0.37713	31.1794	3.83526	0.000360656	0.4163	14.1174	O95721	SNP29_HUMAN	SNAP29	Synaptosomal-associated protein 29
24.0159	24.0424	24.035	23.9842	23.9459	23.943	23.9716	24.0059	24.0122	+	+	PE3_PE1;PE7_PE1	18	15	0	2.0498	0.00343944	-0.0734227	-4.75826	1.09263	0.037215	-0.0345268	-2.32388	O95747	OXSR1_HUMAN	OXSR1	Serine/threonine-protein kinase OSR1
20.4927	20.4342	20.4501	20.555	20.6673	20.6468	20.6564	20.4293	20.5547	+		PE3_PE1	9	9	0	1.87633	0.00543803	0.164009	4.23708	0.575257	0.157416	0.0878194	1.29211	O95749	GGPPS_HUMAN	GGPS1	Geranylgeranyl pyrophosphate synthase
25.9416	25.93	25.9701	25.1733	25.1828	25.1192	25.1326	25.165	25.2142	+	+	PE3_PE1;PE7_PE1	43	41	0	5.3568	0	-0.788783	-34.1285	5.09	0.000246787	-0.776637	-29.2546	O95757	HS74L_HUMAN	HSPA4L	Heat shock 70 kDa protein 4L
23.2066	23.2227	23.2302	23.1198	23.0247	23.0405	23.1586	23.2916	23.2934	+		PE3_PE1	8	8	0	2.19556	0.0024841	-0.158183	-5.23214	0.244982	0.6551	0.0279961	0.619926	O95758	PTBP3_HUMAN	PTBP3	Polypyrimidine tract-binding protein 3
20.7113	20.789	20.4839	21.2358	21.2627	21.2553	21.2554	21.1743	21.2715	+	+	PE3_PE1;PE7_PE1	4	4	0	2.51914	0.00138221	0.589866	6.41989	2.39498	0.00291236	0.572349	5.94029	O95772	STR3N_HUMAN	STARD3NL	STARD3 N-terminal-like protein
24.6676	24.6681	24.654	25.0401	25.0182	24.9699	24.9773	25.0363	25.1178	+	+	PE3_PE1;PE7_PE1	6	6	0	4.08184	0	0.346136	16.304	3.12595	0.00120293	0.380571	9.28564	O95777	LSM8_HUMAN	LSM8	U6 snRNA-associated Sm-like protein LSm8
24.2731	24.2602	24.2687	24.2601	24.2962	24.2853	24.2662	24.2701	24.253				45	35	0	0.511168	0.190107	0.013216	1.16655	0.263317	0.605254	-0.00422223	-0.659933	O95782	AP2A1_HUMAN	AP2A1	AP-2 complex subunit alpha-1
22.3374	22.3385	22.4278	22.1802	22.2078	22.0723	22.1924	22.196	22.3151	+	+	PE3_PE1;PE7_PE1	29	29	0	1.86339	0.00556947	-0.214474	-4.19994	1.24659	0.0258433	-0.133401	-2.65514	O95785	WIZ_HUMAN	WIZ	Protein Wiz
20.1968	20.1919	20.2737	19.3982	19.5315	19.3639	19.3135	19.4924	19.3283	+	+	PE3_PE1;PE7_PE1	26	26	0	3.78612	9.03132e-05	-0.789599	-13.717	3.73894	0.000692483	-0.842717	-13.3429	O95786	RIGI_HUMAN	RIGI	Antiviral innate immune response receptor RIG-I
22.2642	22.277	22.3714	22.7887	22.7599	22.7632	22.6761	22.6694	22.6497	+	+	PE3_PE1;PE7_PE1	29	27	0	3.73712	8.65922e-05	0.466458	13.3286	3.31599	0.000858708	0.360891	10.3982	O95793	STAU1_HUMAN	STAU1	Double-stranded RNA-binding protein Staufen homolog 1
22.4873	22.3544	22.343	22.3918	22.3736	22.3968	22.3696	22.3788	22.3993				20	20	0	0.0552895	0.948182	-0.0075086	-0.160236	0.0934391	0.90247	-0.0123425	-0.261779	O95801	TTC4_HUMAN	TTC4	Tetratricopeptide repeat protein 4
16.0697	16.4293	16.6555	17.3365	16.9367	16.9392	16.9293	17.4186	16.7483	+	+	PE3_PE1;PE7_PE1	2	2	0	1.47167	0.0145703	0.685999	3.1732	1.15725	0.0320862	0.64725	2.46092	O95807	TM50A_HUMAN	TMEM50A	Transmembrane protein 50A
25.0296	24.9573	24.9715	24.8458	24.9296	24.8583	24.9424	24.8915	24.9244	+	+	PE3_PE1;PE7_PE1	15	15	0	1.468	0.0147105	-0.10825	-3.16439	1.17727	0.0304867	-0.0667248	-2.50394	O95816	BAG2_HUMAN	BAG2	BAG family molecular chaperone regulator 2
19.6754	19.5429	19.5036	19.6682	19.8308	19.6469	19.6867	19.6796	19.6844		+	PE7_PE1	18	18	0	0.841678	0.0672993	0.141326	1.81334	0.988271	0.0486572	0.109629	2.10786	O95817	BAG3_HUMAN	BAG3	BAG family molecular chaperone regulator 3
22.4002	22.3881	22.3268	21.8263	21.8756	21.8498	21.7942	21.994	21.89	+	+	PE3_PE1;PE7_PE1	19	19	0	4.38294	0	-0.521131	-19.4252	2.82059	0.0015836	-0.478977	-7.72557	O95822	DCMC_HUMAN	MLYCD	Malonyl-CoA decarboxylase
25.1104	25.2031	25.2644	25.0751	25.167	25.1062	25.0985	25.0401	25.0506		+	PE7_PE1	12	12	0	0.66363	0.112986	-0.0765527	-1.46433	1.26101	0.0250481	-0.129625	-2.68703	O95825	QORL1_HUMAN	CRYZL1	Quinone oxidoreductase-like protein 1
24.2907	24.2395	24.1934	24.4755	24.4617	24.4793	24.4662	24.4932	24.4843	+	+	PE3_PE1;PE7_PE1	27	27	0	2.89284	0.000585366	0.230943	8.07144	2.92275	0.00132935	0.240011	8.21869	O95831	AIFM1_HUMAN	AIFM1	Apoptosis-inducing factor 1
22.3479	22.2799	22.295	22.1221	22.2152	22.1679	22.218	22.2192	22.1947	+	+	PE3_PE1;PE7_PE1	22	21	0	1.83123	0.00588711	-0.139169	-4.10858	1.92685	0.00593589	-0.096948	-4.38438	O95834	EMAL2_HUMAN	EML2	Echinoderm microtubule-associated protein-like 2
20.9801	20.8417	20.8647	20.9264	20.6975	20.9355	20.9583	20.7664	20.7288				13	12	0	0.181537	0.791562	-0.0423743	-0.476837	0.395584	0.308756	-0.0776583	-0.936192	O95835	LATS1_HUMAN	LATS1	Serine/threonine-protein kinase LATS1
20.9222	21.3382	21.2993	20.5404	20.5743	20.8454	20.7789	20.6277	20.5116	+	+	PE3_PE1;PE7_PE1	2	2	0	1.50364	0.0134015	-0.533237	-3.25056	1.62841	0.0108174	-0.547146	-3.56274	O95857	TSN13_HUMAN	TSPAN13	Tetraspanin-13
24.6967	24.6908	24.7486	24.8329	24.867	24.8338	24.7677	24.7311	24.7729	+		PE3_PE1	17	17	0	2.45248	0.00151755	0.132541	6.15852	0.936609	0.0561859	0.0452226	2.00303	O95861	BPNT1_HUMAN	BPNT1	3'(2')
20.3593	20.0846	20.0997	23.9016	23.9061	23.8765	23.8469	23.8351	23.6997	+	+	PE3_PE1;PE7_PE1	14	14	0	5.69299	0	3.71354	41.4347	5.44026	0.0004	3.6127	35.813	O95864	FADS2_HUMAN	FADS2	Acyl-CoA 6-desaturase
22.4061	22.3391	22.3463	22.7791	22.8212	22.7759	22.7323	22.8133	22.7357	+	+	PE3_PE1;PE7_PE1	17	16	0	4.11413	0	0.428232	16.6137	3.51443	0.000786802	0.396602	11.6929	O95865	DDAH2_HUMAN	DDAH2	Putative hydrolase DDAH2
22.5349	22.459	22.4581	22.3448	22.3444	22.2396	22.2006	22.3036	22.2632	+	+	PE3_PE1;PE7_PE1	22	22	0	1.80357	0.0064484	-0.174392	-4.0311	2.35872	0.00307994	-0.228188	-5.80602	O95870	ABHGA_HUMAN	ABHD16A	Phosphatidylserine lipase ABHD16A
19.2275	18.5983	19.1895	18.4391	18.6351	19.0044	18.9306	18.8142	18.5922				7	7	0	0.522574	0.182799	-0.312237	-1.18897	0.426113	0.270038	-0.226104	-0.997732	O95872	GPAN1_HUMAN	GPANK1	G patch domain and ankyrin repeat-containing protein 1
18.4352	18.3937	18.5017	19.3901	19.4795	19.5111	19.3552	19.2858	18.9728	+	+	PE3_PE1;PE7_PE1	7	7	0	4.53293	0	1.01667	21.1917	2.47643	0.00248479	0.761089	6.25139	O95873	CF047_HUMAN	C6orf47	Uncharacterized protein C6orf47
25.0061	24.9455	25.0181	24.8594	24.8176	24.8789	24.7956	24.7479	24.7626	+	+	PE3_PE1;PE7_PE1	9	9	0	2.05747	0.00336684	-0.137894	-4.78235	2.94628	0.00134775	-0.221186	-8.3362	O95881	TXD12_HUMAN	TXNDC12	Thioredoxin domain-containing protein 12
20.4546	20.4262	20.3878	20.0657	20.4311	20.0437	20.0391	20.3146	20.1374		+	PE7_PE1	15	15	0	0.890218	0.059138	-0.242738	-1.9099	1.4523	0.0156136	-0.259192	-3.1268	O95900	TRUB2_HUMAN	TRUB2	Pseudouridylate synthase TRUB2
22.0887	22.2122	21.8817	22.0353	22.1923	22.1079	22.2524	22.1923	22.2058				14	14	0	0.182325	0.790202	0.0510089	0.478665	0.727958	0.0985064	0.155995	1.58979	O95905	ECD_HUMAN	ECD	Protein ecdysoneless homolog
22.1588	22.2078	22.2415	21.6606	21.5517	21.7001	21.3816	21.4638	21.568	+	+	PE3_PE1;PE7_PE1	10	10	0	3.44226	0.000141472	-0.565233	-11.2053	3.61306	0.00071399	-0.73158	-12.3921	O95926	SYF2_HUMAN	SYF2	Pre-mRNA-splicing factor SYF2
20.7275	20.7379	20.7927	21.4063	21.4222	21.4807	21.4209	21.4297	21.355	+	+	PE3_PE1;PE7_PE1	12	10	0	4.63872	0	0.68375	22.5318	4.50864	0.000137931	0.649185	20.8952	O95983	MBD3_HUMAN	MBD3	Methyl-CpG-binding domain protein 3
23.4673	23.4193	23.4676	23.4779	23.6601	23.4437	23.4678	23.6965	23.5886				22	21	0	0.476355	0.217685	0.0758069	1.09784	0.912799	0.0601706	0.13291	1.95512	O95985	TOP3B_HUMAN	TOP3B	DNA topoisomerase 3-beta-1
22.4374	22.4602	22.406	22.5516	22.4973	22.4466	22.4419	22.4689	22.5137				8	7	0	0.871496	0.0621716	0.0639356	1.87256	0.702472	0.106089	0.0402915	1.54004	O95989	NUDT3_HUMAN	NUDT3	Diphosphoinositol polyphosphate phosphohydrolase 1
17.1005	17.0644	17.263	17.1877	17.1075	15.4371	17.1073	17.4342	17.458				3	1	0	0.419692	0.274021	-0.565208	-0.984841	0.672764	0.115349	0.190553	1.48213	O95997	PTTG1_HUMAN	PTTG1	Securin
21.8511	21.7423	21.7132	21.127	21.2716	21.0867	21.3145	21.0888	21.2331	+	+	PE3_PE1;PE7_PE1	8	8	0	3.00991	0.000418685	-0.607108	-8.66174	2.68643	0.00178736	-0.556763	-7.11827	O95999	BCL10_HUMAN	BCL10	B-cell lymphoma/leukemia 10
25.3903	25.4585	25.3912	24.3265	24.4197	24.3405	24.3578	24.4312	24.418	+	+	PE3_PE1;PE7_PE1	8	8	0	5.04945	0	-1.05114	-28.577	5.22707	0.0003	-1.01101	-31.6654	O96000	NDUBA_HUMAN	NDUFB10	NADH dehydrogenase [ubiquinone] 1 beta subcomplex subunit 10
23.3407	23.3367	23.4051	23.8669	23.9377	23.8635	23.9332	23.9169	23.9632	+	+	PE3_PE1;PE7_PE1	17	17	0	4.06152	0	0.528555	16.1121	4.6144	0.000152866	0.576947	22.2165	O96005	CLPT1_HUMAN	CLPTM1	Putative lipid scramblase CLPTM1
20.6893	20.8654	20.8447	20.5165	20.4948	20.3535	20.348	20.4648	20.3507	+	+	PE3_PE1;PE7_PE1	9	9	0	1.98785	0.00391717	-0.344828	-4.56706	2.43568	0.00266011	-0.411964	-6.09406	O96007	MOC2B_HUMAN	MOCS2	Molybdopterin synthase catalytic subunit
24.4443	24.6216	24.6532	24.9326	25.0041	24.955	24.7998	25.0185	24.8793	+	+	PE3_PE1;PE7_PE1	12	12	0	2.33508	0.00191816	0.390869	5.71987	1.63413	0.0107122	0.32612	3.57745	O96008	TOM40_HUMAN	TOMM40	Mitochondrial import receptor subunit TOM40 homolog
23.6357	23.5602	23.6179	23.3439	23.3476	23.335	23.4904	23.4908	23.476	+	+	PE3_PE1;PE7_PE1	12	12	0	3.46597	0.000143602	-0.262423	-11.3634	2.15615	0.00408796	-0.118866	-5.10054	O96011	PX11B_HUMAN	PEX11B	Peroxisomal membrane protein 11B
20.8984	20.9416	21.1662	20.8146	20.6281	20.8388	21.0528	20.9118	20.5451	+		PE3_PE1	15	13	0	1.06689	0.037468	-0.241563	-2.27003	0.406864	0.294027	-0.165517	-0.959003	O96013	PAK4_HUMAN	PAK4	Serine/threonine-protein kinase PAK 4
21.761	21.7645	21.727	21.455	21.5983	21.5269	21.6124	21.6829	21.6245	+	+	PE3_PE1;PE7_PE1	10	9	0	2.18704	0.00250813	-0.224076	-5.20345	1.95463	0.00548711	-0.110886	-4.46688	O96017	CHK2_HUMAN	CHEK2	Serine/threonine-protein kinase Chk2
20.317	20.5842	20.3375	20.4627	20.6946	20.7009	20.7336	20.6927	20.8498		+	PE7_PE1	5	5	0	0.823026	0.0705512	0.206528	1.77645	1.61603	0.0111302	0.345771	3.53101	O96018	APBA3_HUMAN	APBA3	Amyloid-beta A4 precursor protein-binding family A member 3
24.4932	24.5201	24.5061	24.4011	24.4231	24.467	24.3466	24.3596	24.3014	+	+	PE3_PE1;PE7_PE1	17	13	0	1.65962	0.00919163	-0.0760784	-3.64349	3.04524	0.00124942	-0.170628	-8.84749	O96019	ACL6A_HUMAN	ACTL6A	Actin-like protein 6A
20.6262	20.66	17.1813	20.2317	20.3768	20.6614	18.8742	20.996	20.4502				2	2	2	0.331516	0.418071	0.934134	0.80469	0.178066	0.791528	0.617692	0.468768	O96020	CCNE2_HUMAN	CCNE2	G1/S-specific cyclin-E2
20.8162	20.9678	20.6703	20.4557	20.4553	20.1338	20.4639	20.5036	20.5117	+	+	PE3_PE1;PE7_PE1	24	24	0	1.57238	0.0112659	-0.469856	-3.42049	1.69264	0.00972675	-0.325067	-3.73019	O96028	NSD2_HUMAN	NSD2	Histone-lysine N-methyltransferase NSD2
21.8755	22.0004	21.8617	21.5885	21.5308	21.4652	21.5715	21.6578	21.4892	+	+	PE3_PE1;PE7_PE1	4	4	0	2.60722	0.00113565	-0.384359	-6.77979	2.17758	0.00387766	-0.33972	-5.17176	O96033	MOC2A_HUMAN	MOCS2	Molybdopterin synthase sulfur carrier subunit
23.7519	24.0204	23.8262	23.2701	23.1382	23.205	23.2751	23.2009	23.3104	+	+	PE3_PE1;PE7_PE1	2	2	0	2.76414	0.00092296	-0.661764	-7.46466	2.6585	0.00185066	-0.604041	-6.99728	P00156	CYB_HUMAN	MT-CYB	Cytochrome b
23.9548	23.8963	23.8982	23.6684	23.7611	23.7779	23.4597	23.6333	23.4384	+	+	PE3_PE1;PE7_PE1	7	0	0	2.00565	0.00380364	-0.180662	-4.6214	2.4838	0.00249899	-0.40597	-6.28017	P00167;cRAP-P00167	CYB5_HUMAN;cRAP-CYB5_HUMAN	CYB5A;cRAP-CYB5A	Cytochrome b5
30.0995	30.0539	30.0617	29.8037	29.7957	29.8028	29.7617	29.7865	29.7458	+	+	PE3_PE1;PE7_PE1	24	23	0	4.33894	0	-0.270931	-18.9349	4.12285	0.000328141	-0.307042	-16.6983	P00338	LDHA_HUMAN	LDHA	L-lactate dehydrogenase A chain
24.3758	24.4802	24.3483	24.1955	24.1901	24.1431	24.2046	24.2127	24.1422	+	+	PE3_PE1;PE7_PE1	30	4	0	2.17992	0.00250242	-0.225182	-5.17961	2.02455	0.00493533	-0.214918	-4.67961	P00367	DHE3_HUMAN	GLUD1	Glutamate dehydrogenase 1
23.8633	23.9184	23.8108	23.4905	23.4903	23.4904	23.5581	23.5821	23.6896	+	+	PE3_PE1;PE7_PE1	11	7	0	3.56313	0.000153846	-0.373784	-12.0333	2.12151	0.00421677	-0.25425	-4.98703	P00374	DYR_HUMAN	DHFR	Dihydrofolate reductase
23.7724	23.7716	23.7286	24.4745	24.4639	24.5028	24.4986	24.5013	24.5138	+	+	PE3_PE1;PE7_PE1	18	18	0	5.58717	0	0.722844	38.981	5.98956	0.000813559	0.747051	49.1618	P00387	NB5R3_HUMAN	CYB5R3	NADH-cytochrome b5 reductase 3
24.7005	24.7233	24.7337	24.3901	24.4207	24.4192	24.3865	24.3607	24.4133	+	+	PE3_PE1;PE7_PE1	22	22	0	4.60635	0	-0.309203	-22.1132	4.28902	0.000225617	-0.332355	-18.3936	P00390	GSHR_HUMAN	GSR	Glutathione reductase
21.2965	21.162	21.3183	20.6036	20.6076	21.1794	21.0524	21.138	20.9407	+	+	PE3_PE1;PE7_PE1	2	2	0	1.10055	0.0344989	-0.462052	-2.34052	1.33926	0.0205682	-0.21527	-2.86307	P00395	COX1_HUMAN	MT-CO1	Cytochrome c oxidase subunit 1
26.6334	26.6763	26.6493	25.8695	25.8999	25.9104	25.9628	25.836	25.9481	+	+	PE3_PE1;PE7_PE1	6	6	0	5.77292	0	-0.759761	-43.3894	4.21094	0.000346872	-0.737352	-17.577	P00403	COX2_HUMAN	MT-CO2	Cytochrome c oxidase subunit 2
23.3579	23.3088	23.3515	22.5925	22.5754	22.5673	22.8075	22.8074	22.9243	+	+	PE3_PE1;PE7_PE1	1	1	0	5.81572	0	-0.761032	-44.4737	3.52516	0.000792839	-0.493023	-11.7672	P00414	COX3_HUMAN	MT-CO3	Cytochrome c oxidase subunit 3
28.2708	28.2548	28.2475	28.362	28.3467	28.3723	27.9096	27.7972	27.8564	+	+	PE3_PE1;PE7_PE1	6	0	0	3.27355	0.000334359	0.102635	10.1394	3.57955	0.000694836	-0.403283	-12.1502	P00441;cRAP-P00441	SODC_HUMAN;cRAP-SODC_HUMAN	SOD1;cRAP-SOD1	Superoxide dismutase [Cu-Zn]
22.7515	22.6184	22.7521	22.6051	22.5856	22.4954	22.7414	22.7137	22.8791	+		PE3_PE1	5	4	0	1.22204	0.025455	-0.145276	-2.60117	0.449148	0.245998	0.0707302	1.04379	P00488	F13A_HUMAN	F13A1	Coagulation factor XIII A chain
24.7397	24.8756	24.8206	25.3646	25.3952	25.3973	25.0607	25.2087	25.1541	+	+	PE3_PE1;PE7_PE1	20	20	0	3.82642	9.32331e-05	0.573749	14.0446	2.30902	0.00320394	0.329205	5.62608	P00491	PNPH_HUMAN	PNP	Purine nucleoside phosphorylase
25.5135	25.5631	25.5638	25.1869	25.2179	25.1898	25.1028	25.1429	25.1379	+	+	PE3_PE1;PE7_PE1	12	12	0	4.25319	0	-0.34856	-18.0143	4.438	0.000254642	-0.418919	-20.0562	P00492	HPRT_HUMAN	HPRT1	Hypoxanthine-guanine phosphoribosyltransferase
26.9116	27.0087	27.0624	25.7732	25.9264	25.8579	25.7868	25.8663	25.8441	+	+	PE3_PE1;PE7_PE1	26	26	0	4.27618	0	-1.14173	-18.2568	4.6887	0.00016609	-1.16184	-23.1937	P00505	AATM_HUMAN	GOT2	Aspartate aminotransferase
19.3187	19.6495	19.033	18.6821	18.2589	18.4044	18.1158	18.1448	17.9855	+	+	PE3_PE1;PE7_PE1	11	11	0	1.82006	0.00613392	-0.885221	-4.07718	2.60609	0.00201211	-1.25166	-6.7751	P00519	ABL1_HUMAN	ABL1	Tyrosine-protein kinase ABL1
28.7366	28.8586	28.8678	28.5969	28.6654	28.6028	28.4566	28.5491	28.5476	+	+	PE3_PE1;PE7_PE1	33	27	0	1.85864	0.00557971	-0.199289	-4.18634	2.36074	0.00308188	-0.303247	-5.81343	P00558	PGK1_HUMAN	PGK1	Phosphoglycerate kinase 1
27.2608	27.2032	27.2704	25.8043	25.7091	25.5387	25.7701	26.047	25.769	+	+	PE3_PE1;PE7_PE1	7	7	0	4.3801	0	-1.56078	-19.3931	3.89078	0.00037415	-1.3828	-14.5834	P00734	THRB_HUMAN	F2	Prothrombin
18.1942	19.1834	18.2417	20.1672	20.3998	20.3627	20.372	20.1822	20.4588	+	+	PE3_PE1;PE7_PE1	15	14	1	2.23389	0.0022942	1.77015	5.36264	2.24774	0.00335731	1.7979	5.41045	P00736	C1R_HUMAN	C1R	Complement C1r subcomponent
17.5693	21.2178	20.6369	17.4214	20.8626	21.3504	21.771	17.9295	21.7284				3	2	3	0.013834	0.986741	0.0700963	0.0418178	0.145763	0.838331	0.668271	0.392235	P00738	HPT_HUMAN	HP	Haptoglobin
25.4519	25.3903	25.4437	21.5715	21.5111	21.3515	21.5492	21.8645	21.8299	+	+	PE3_PE1;PE7_PE1	1	1	0	6.26908	0	-3.95062	-57.7551	5.45885	0.000410256	-3.68074	-36.1992	P00740	FA9_HUMAN	F9	Coagulation factor IX
27.0558	27.1101	27.1378	23.5831	23.4713	23.4826	23.5357	23.6513	23.5507	+	+	PE3_PE1;PE7_PE1	5	5	0	6.91171	0	-3.58891	-83.6298	6.85332	0.00331034	-3.522	-80.8645	P00742	FA10_HUMAN	F10	Coagulation factor X
22.111	22.3293	22.1513	23.2745	23.2921	23.2672	23.3588	23.465	23.4832	+	+	PE3_PE1;PE7_PE1	7	4	0	4.05121	0	1.0807	16.0155	4.04767	0.00042677	1.23842	15.9824	P00747	PLMN_HUMAN	PLG	Plasminogen
26.3288	26.4421	26.4641	24.538	24.5963	24.5622	24.3809	24.4366	24.4172	+	+	PE3_PE1;PE7_PE1	25	25	0	5.66827	0	-1.84619	-40.848	5.81532	0.000653061	-2.00009	-44.4633	P00813	ADA_HUMAN	ADA	Adenosine deaminase
26.0586	25.8967	25.9508	25.439	25.4354	25.4594	25.682	25.5772	25.6076	+	+	PE3_PE1;PE7_PE1	1	1	0	3.39222	0.00019016	-0.524099	-10.8786	2.43492	0.00265924	-0.346429	-6.09118	P00846	ATP6_HUMAN	MT-ATP6	ATP synthase subunit a
21.3074	21.3928	20.919	22.8309	22.9536	22.9362	23.122	23.2713	23.207	+	+	PE3_PE1;PE7_PE1	15	15	0	3.45373	0.000142283	1.70052	11.2815	3.70906	0.000673063	1.99369	13.1111	P00966	ASSY_HUMAN	ASS1	Argininosuccinate synthase
21.7446	21.8267	21.816	21.6568	21.4957	21.4867	21.2756	21.2623	21.3016	+	+	PE3_PE1;PE7_PE1	12	12	0	1.82409	0.00603833	-0.249317	-4.0885	4.27751	0.000223516	-0.51594	-18.2709	P00973	OAS1_HUMAN	OAS1	2'-5'-oligoadenylate synthase 1
22.6197	22.527	22.4881	22.3812	22.3709	22.4487	22.072	22.1697	21.9882	+	+	PE3_PE1;PE7_PE1	7	0	0	1.45853	0.0150873	-0.144646	-3.14168	2.69669	0.00179738	-0.468312	-7.16316	P01008;cRAP-P01008	ANT3_HUMAN;cRAP-ANT3_HUMAN	SERPINC1;cRAP-SERPINC1	Antithrombin-III
20.637	20.4146	20.8168	19.6549	20.3451	20.1607	20.6535	19.991	20.3375	+		PE3_PE1	3	2	0	1.13029	0.0319501	-0.569257	-2.40341	0.589427	0.149707	-0.29548	-1.31976	P01009	A1AT_HUMAN	SERPINA1	Alpha-1-antitrypsin
24.1314	24.0275	24.0449	23.4903	23.5136	23.4505	23.6498	23.716	23.5843	+	+	PE3_PE1;PE7_PE1	13	10	0	4.02227	0	-0.583145	-15.7474	2.95841	0.00135951	-0.417919	-8.3974	P01023	A2MG_HUMAN	A2M	Alpha-2-macroglobulin
23.6111	23.52	23.5431	23.1507	23.0272	23.0883	23.4012	23.34	23.362	+	+	PE3_PE1;PE7_PE1	21	20	0	3.32394	0.000182011	-0.469355	-10.4473	2.36454	0.00308774	-0.19035	-5.82742	P01024	CO3_HUMAN	C3	Complement C3
20.4306	20.4617	20.6592	20.724	20.7333	20.6739	20.3553	20.5267	20.2285	+		PE3_PE1	5	0	0	1.22752	0.0251686	0.19322	2.61318	0.584564	0.152275	-0.147022	-1.31027	P01031;cRAP-P01031	CO5_HUMAN;cRAP-CO5_HUMAN	C5;cRAP-C5	Complement C5
20.7746	20.4122	20.4544	21.5644	21.3601	21.3726	21.4632	21.3473	21.2931	+	+	PE3_PE1;PE7_PE1	6	6	0	2.58771	0.00115673	0.885273	6.69861	2.55618	0.00220132	0.820735	6.56921	P01033	TIMP1_HUMAN	TIMP1	Metalloproteinase inhibitor 1
21.2284	21.3713	20.9449	21.6888	21.829	21.8255	21.5881	21.5714	21.5753	+	+	PE3_PE1;PE7_PE1	4	4	0	1.96245	0.00414033	0.599596	4.49031	1.46782	0.0149723	0.396757	3.16394	P01034	CYTC_HUMAN	CST3	Cystatin-C
19.1884	19.3127	19.1953	17.3569	17.051	17.7082	17.2461	17.8479	17.7571	+	+	PE3_PE1;PE7_PE1	2	2	2	3.17873	0.000315738	-1.86011	-9.58295	2.96448	0.00136667	-1.6151	-8.42816	P01040	CYTA_HUMAN	CSTA	Cystatin-A
18.2089	18.1221	17.5794	18.6636	18.4343	18.372	18.8391	18.8465	18.3353	+	+	PE3_PE1;PE7_PE1	4	3	1	1.1318	0.0318571	0.519828	2.40663	1.27113	0.0245886	0.703501	2.70953	P01106	MYC_HUMAN	MYC	Myc proto-oncogene protein
24.1872	24.0887	24.1166	23.5772	23.3607	23.4745	23.3393	23.6617	23.4946	+	+	PE3_PE1;PE7_PE1	5	2	0	3.17457	0.000315128	-0.660016	-9.5592	2.53394	0.00232289	-0.632294	-6.47921	P01111	RASN_HUMAN	NRAS	GTPase NRas
19.6654	19.763	19.4441	21.2267	21.1101	21.1796	20.7513	20.6545	20.5259	+	+	PE3_PE1;PE7_PE1	2	0	0	3.98874	0	1.54791	15.4423	3.05281	0.00115276	1.0197	8.88775	P01112;cRAP-P01112	RASH_HUMAN;cRAP-RASH_HUMAN	HRAS;cRAP-HRAS	GTPase HRas
22.6416	22.8791	22.7928	22.7505	22.6163	22.5502	22.7108	22.6376	22.7136				8	4	0	0.657034	0.115404	-0.132153	-1.45149	0.49621	0.206545	-0.0838464	-1.13708	P01116	RASK_HUMAN	KRAS	GTPase KRas
21.1358	21.0863	20.9723	23.2205	23.2279	23.1797	23.1088	23.1524	23.0793	+	+	PE3_PE1;PE7_PE1	31	30	0	5.72957	0	2.14456	42.3181	5.57706	0.000489796	2.04871	38.7544	P01130	LDLR_HUMAN	LDLR	Low-density lipoprotein receptor
18.0852	17.6802	17.6445	18.1706	17.7583	17.5195	18.0948	17.5739	18.0664				7	7	0	0.0180178	0.98293	0.0128454	0.0542181	0.188116	0.773611	0.10844	0.492057	P01137	TGFB1_HUMAN	TGFB1	Transforming growth factor beta-1 proprotein
21.4693	21.5359	21.5896	19.0391	18.433	17.4547	18.238	18.9942	18.2425	+	+	PE3_PE1;PE7_PE1	2	0	1	2.65033	0.000958049	-3.22267	-6.96224	3.55592	0.000813648	-3.04006	-11.9824	P01344;cRAP-P01344	IGF2_HUMAN;cRAP-IGF2_HUMAN	IGF2;cRAP-IGF2	Insulin-like growth factor II
29.5089	29.5085	29.4899	30.7463	30.7144	30.7181	30.6044	30.7487	30.7869	+	+	PE3_PE1;PE7_PE1	12	12	0	7.27803	0	1.22383	103.271	4.57083	0.000147239	1.2109	21.6626	P01591	IGJ_HUMAN	JCHAIN	Immunoglobulin J chain
17.5421	17.3977	18.6625	18.4747	18.9598	17.0632	17.5418	18.3022	18.3554				1	1	3	0.161257	0.821695	0.298461	0.42928	0.155684	0.824269	0.199009	0.416028	P01619	KV320_HUMAN	IGKV3-20	Immunoglobulin kappa variable 3-20
31.332	31.449	31.3867	30.5913	30.7151	30.6703	30.8334	30.755	30.8385	+	+	PE3_PE1;PE7_PE1	6	6	0	3.90967	0	-0.730328	-14.7454	3.7469	0.000697781	-0.580233	-13.4054	P01834	IGKC_HUMAN	IGKC	Immunoglobulin kappa constant
22.2551	21.8182	21.8123	21.4784	20.5968	21.3255	21.7059	21.5494	21.5115	+	+	PE3_PE1;PE7_PE1	1	1	0	1.25812	0.0234528	-0.828283	-2.68063	1.10831	0.0360101	-0.372952	-2.35689	P01857	IGHG1_HUMAN	IGHG1	Immunoglobulin heavy constant gamma 1
30.4703	30.4253	30.4916	22.69	22.6493	22.6076	21.7787	21.9786	22.0208	+	+	PE3_PE1;PE7_PE1	18	9	0	8.84114	0	-7.81346	-253.987	7.39708	0	-8.53641	-110.598	P01859	IGHG2_HUMAN	IGHG2	Immunoglobulin heavy constant gamma 2
24.2333	24.2992	24.2218	23.7058	23.8248	23.7246	24.0078	23.576	23.6401	+	+	PE3_PE1;PE7_PE1	3	1	0	3.46015	0.000143187	-0.499701	-11.3244	1.69363	0.00973375	-0.510145	-3.73281	P01860	IGHG3_HUMAN	IGHG3	Immunoglobulin heavy constant gamma 3
19.4262	19.4413	19.4582	18.7207	18.8362	18.8459	19.2014	19.0504	19.3997	+	+	PE3_PE1;PE7_PE1	3	2	0	3.99967	0	-0.640975	-15.5411	1.03942	0.0427719	-0.224726	-2.21298	P01876	IGHA1_HUMAN	IGHA1	Immunoglobulin heavy constant alpha 1
25.2111	25.1833	25.246	24.7008	24.7075	24.7332	24.7397	24.7452	24.6842	+	+	PE3_PE1;PE7_PE1	7	5	0	4.76184	0	-0.499624	-24.1972	4.29239	0.000226148	-0.490443	-18.4296	P01889	HLAB_HUMAN	HLA-B	HLA class I histocompatibility antigen
24.8033	24.7177	24.8075	23.9673	23.8296	23.8013	24.017	24.105	23.7985	+	+	PE3_PE1;PE7_PE1	2	2	0	3.98505	0	-0.910103	-15.4091	2.95623	0.00135833	-0.802622	-8.38637	P01893	HLAH_HUMAN	HLA-H	Putative HLA class I histocompatibility antigen
19.9014	19.9535	19.8653	20.986	20.1691	21.1407	21.1629	21.1651	21.5033	+	+	PE3_PE1;PE7_PE1	2	1	0	1.32838	0.019682	0.858549	2.8383	3.53219	0.000797941	1.37038	11.816	P02100	HBE_HUMAN	HBE1	Hemoglobin subunit epsilon
25.3923	25.3964	25.3868	26.4073	26.4061	26.372	26.3527	26.3673	26.4074	+	+	PE3_PE1;PE7_PE1	49	47	0	6.92445	0	1.00329	84.2457	6.31612	0.00135211	0.983928	59.342	P02545	LMNA_HUMAN	LMNA	Prelamin-A/C
23.9531	24.018	23.9558	24.0469	23.9715	24.0765	24.1522	24.241	24.1571		+	PE7_PE1	11	11	0	0.672655	0.110216	0.0559769	1.48191	2.35869	0.00307896	0.207783	5.8059	P02647	APOA1_HUMAN	APOA1	Apolipoprotein A-I
25.4159	25.4606	25.3366	25.6111	25.7038	25.6644	25.9653	25.9974	25.8895	+	+	PE3_PE1;PE7_PE1	10	10	0	2.31902	0.00196629	0.255416	5.66192	3.45646	0.000828589	0.546343	11.2997	P02649	APOE_HUMAN	APOE	Apolipoprotein E
20.0204	19.8805	19.6629	19.4252	18.9648	19.7408	19.8912	19.1469	19.8296				2	2	0	0.897599	0.0578551	-0.477644	-1.92466	0.373752	0.342299	-0.232043	-0.891776	P02652	APOA2_HUMAN	APOA2	Apolipoprotein A-II
20.2087	20.613	19.8386	19.3741	19.6583	19.3715	19.2229	16.8451	19.551	+		PE3_PE1	1	1	1	1.43878	0.0156114	-0.752114	-3.09463	0.888522	0.0641755	-1.68043	-1.90651	P02655	APOC2_HUMAN	APOC2	Apolipoprotein C-II
23.916	23.9662	23.9471	23.0472	23.1268	23.1688	23.3369	23.3941	23.351	+	+	PE3_PE1;PE7_PE1	1	1	0	4.55818	0	-0.828828	-21.5042	4.87224	0.000200837	-0.582435	-25.7936	P02656	APOC3_HUMAN	APOC3	Apolipoprotein C-III
20.8813	20.7565	20.6898	19.724	20.0119	19.7697	20.3023	20.2764	20.2882	+	+	PE3_PE1;PE7_PE1	9	9	0	3.05809	0.000389286	-0.940648	-8.91596	2.99797	0.0013022	-0.486913	-8.59982	P02671	FIBA_HUMAN	FGA	Fibrinogen alpha chain
22.2118	21.9856	22.2142	21.4247	21.5797	21.4652	21.4916	21.6711	21.3532	+	+	PE3_PE1;PE7_PE1	4	4	0	2.72361	0.000902985	-0.647347	-7.28218	2.21528	0.00359479	-0.631855	-5.29895	P02675	FIBB_HUMAN	FGB	Fibrinogen beta chain
20.6435	21.0291	20.74	20.3608	19.748	20.4787	20.3155	20.4329	20.4422	+	+	PE3_PE1;PE7_PE1	3	3	0	1.12464	0.0323287	-0.608357	-2.39142	1.53026	0.0129256	-0.407306	-3.31579	P02679	FIBG_HUMAN	FGG	Fibrinogen gamma chain
19.2108	18.9803	19.8753	18.8381	19.2074	18.5414	19.2261	19.1042	19.3877				2	2	0	0.678309	0.108226	-0.493144	-1.49293	0.154731	0.825742	-0.116101	-0.413755	P02748	CO9_HUMAN	C9	Complement component C9
21.4453	21.4792	21.3412	20.4118	20.637	20.4273	20.5014	20.3869	20.5096	+	+	PE3_PE1;PE7_PE1	2	2	0	3.42899	0.000140351	-0.929876	-11.1178	4.11883	0.000327122	-0.955912	-16.6592	P02749	APOH_HUMAN	APOH	Beta-2-glycoprotein 1
22.296	22.2889	22.2864	21.2139	21.2042	21.1468	21.4082	21.3192	21.4041	+	+	PE3_PE1;PE7_PE1	40	40	0	6.09222	0	-1.10214	-52.1588	5.20884	0.000292683	-0.913306	-31.3337	P02751	FINC_HUMAN	FN1	Fibronectin
19.3918	19.6421	19.6613	18.9533	19.1399	19.2229	18.5023	19.1116	18.6982	+	+	PE3_PE1;PE7_PE1	3	0	0	1.75606	0.00705572	-0.459719	-3.90034	1.78608	0.0078257	-0.794359	-3.98263	P02753;cRAP-P02753	RET4_HUMAN;cRAP-RET4_HUMAN	RBP4;cRAP-RBP4	Retinol-binding protein 4
21.6033	21.6219	21.69	20.2814	20.2987	20.4172	20.2136	20.4068	20.5268	+	+	PE3_PE1;PE7_PE1	3	3	0	4.88874	0	-1.30594	-26.0411	3.72384	0.000683658	-1.256	-13.2252	P02760	AMBP_HUMAN	AMBP	Protein AMBP
24.9244	24.9023	24.903	25.0346	25.0885	25.05	24.9595	24.9225	24.9419	+	+	PE3_PE1;PE7_PE1	34	0	0	2.95701	0.000500421	0.147767	8.39031	1.14394	0.0332211	0.031402	2.43247	P02768;cRAP-P02768	ALBU_HUMAN;cRAP-ALBU_HUMAN	ALB;cRAP-ALB	Albumin
24.0795	24.1362	24.1731	22.848	22.9082	22.7797	22.8329	22.7614	22.7312	+	+	PE3_PE1;PE7_PE1	5	5	0	5.00727	0	-1.2843	-27.8886	5.31663	0.000344086	-1.35443	-33.3461	P02771	FETA_HUMAN	AFP	Alpha-fetoprotein
22.9552	22.9827	23.1191	21.9509	22.1415	22.1701	21.8565	22.0174	21.8803	+	+	PE3_PE1;PE7_PE1	5	5	0	3.39588	0.000137549	-0.931509	-10.9022	3.98858	0.00040404	-1.10095	-15.4409	P02774	VTDB_HUMAN	GC	Vitamin D-binding protein
25.6521	25.5932	25.6234	25.844	25.8593	25.8096	25.8126	25.8629	25.853	+	+	PE3_PE1;PE7_PE1	39	38	0	3.17334	0.000314976	0.214715	9.55214	3.18073	0.00109238	0.219941	9.59437	P02786	TFR1_HUMAN	TFRC	Transferrin receptor protein 1
20.1757	19.8844	20.4641	19.825	20.021	19.7613	19.6962	19.9054	19.8832				9	0	0	0.761024	0.0846928	-0.305621	-1.65449	0.897439	0.0626976	-0.346466	-1.92434	P02787;cRAP-P02787	TRFE_HUMAN;cRAP-TRFE_HUMAN	TF;cRAP-TF	Serotransferrin
25.8651	25.6752	25.7425	25.1726	25.2085	25.1331	24.8413	24.8547	24.8358	+	+	PE3_PE1;PE7_PE1	3	0	0	3.22918	0.000326163	-0.589556	-9.87538	4.09343	0.000318548	-0.917051	-16.4145	P02788;cRAP-P02788	TRFL_HUMAN;cRAP-TRFL_HUMAN	LTF;cRAP-LTF	Lactotransferrin
23.6555	23.5988	23.575	24.056	24.0653	24.0678	24.0375	24.0038	23.9714	+	+	PE3_PE1;PE7_PE1	7	7	0	4.32305	0	0.453263	18.761	3.68088	0.000661349	0.394473	12.896	P02792	FRIL_HUMAN	FTL	Ferritin light chain
22.8597	22.7689	22.6836	23.0604	23.0765	23.0817	23.0976	23.1685	22.9197	+	+	PE3_PE1;PE7_PE1	9	9	0	2.38341	0.00166376	0.302125	5.89719	1.50063	0.0137596	0.291211	3.24324	P02794	FRIH_HUMAN	FTH1	Ferritin heavy chain
21.2162	21.6192	21.5874	20.6112	20.9758	21.0452	20.6697	20.9585	20.9559	+	+	PE3_PE1;PE7_PE1	3	0	0	1.48154	0.0141964	-0.596869	-3.19698	1.72137	0.00881377	-0.612906	-3.80667	P02795;P13640;P80297	MT1G_HUMAN;MT1X_HUMAN;MT2_HUMAN	MT1G;MT1X;MT2A	Metallothionein-2
20.7948	19.9227	20.2958	18.4024	17.4987	19.2197	19.6647	20.1073	19.6579	+		PE3_PE1	2	2	1	1.61296	0.0102536	-1.96421	-3.52316	0.835341	0.0737971	-0.527847	-1.8008	P03886	NU1M_HUMAN	MT-ND1	NADH-ubiquinone oxidoreductase chain 1
20.1321	21.0396	21.0278	20.2775	20.5311	20.3756	19.8794	19.5747	20.0046		+	PE7_PE1	1	1	0	0.474177	0.219283	-0.338417	-1.09352	1.31057	0.0221421	-0.913603	-2.79794	P03897	NU3M_HUMAN	MT-ND3	NADH-ubiquinone oxidoreductase chain 3
23.6312	23.4654	23.471	22.3491	22.3514	22.2524	22.1362	22.1839	22.1689	+	+	PE3_PE1;PE7_PE1	7	7	0	4.34537	0	-1.20486	-19.0059	4.76306	0.000177122	-1.35949	-24.2143	P03905	NU4M_HUMAN	MT-ND4	NADH-ubiquinone oxidoreductase chain 4
22.9895	22.9549	22.9666	21.4565	20.8122	21.0837	20.9723	20.7889	20.8855	+	+	PE3_PE1;PE7_PE1	5	5	0	3.23453	0.000327309	-1.85288	-9.90686	5.57495	0.000484848	-2.08809	-38.7074	P03915	NU5M_HUMAN	MT-ND5	NADH-ubiquinone oxidoreductase chain 5
23.3722	23.2903	23.4127	22.2853	22.2237	22.3686	22.2649	22.3842	22.2819	+	+	PE3_PE1;PE7_PE1	1	1	0	4.3695	0	-1.06586	-19.2741	4.45273	0.00025876	-1.04806	-20.2284	P03923	NU6M_HUMAN	MT-ND6	NADH-ubiquinone oxidoreductase chain 6
24.5906	24.4205	24.4988	23.9319	24.0389	24.1954	24.2511	24.1551	24.3778	+	+	PE3_PE1;PE7_PE1	3	3	0	2.10244	0.00299178	-0.44788	-4.92541	1.3914	0.017793	-0.241941	-2.98328	P03928	ATP8_HUMAN	MT-ATP8	ATP synthase protein 8
23.152	23.0655	23.2488	23.3641	23.0286	23.0223	23.6587	23.9988	23.7208		+	PE7_PE1	1	1	0	0.0469556	0.955886	-0.0171032	-0.137174	2.25557	0.00337858	0.637351	5.43762	P04003	C4BPA_HUMAN	C4BPA	C4b-binding protein alpha chain
24.3835	24.2672	24.4299	25.0898	24.9944	25.0242	25.2752	25.2699	25.358	+	+	PE3_PE1;PE7_PE1	3	3	0	3.56861	0.000154517	0.675992	12.0723	4.12842	0.000328824	0.940886	16.7526	P04004	VTNC_HUMAN	VTN	Vitronectin
20.1156	20.6046	20.5133	22.3512	22.4426	22.3664	22.3345	22.3123	22.1971	+	+	PE3_PE1;PE7_PE1	23	23	0	3.68568	8.37272e-05	1.97559	12.9324	3.55622	0.000814183	1.87015	11.9844	P04035	HMDH_HUMAN	HMGCR	3-hydroxy-3-methylglutaryl-coenzyme A reductase
23.6562	23.579	23.5697	23.7769	23.741	23.7259	23.3882	23.3296	23.3227	+	+	PE3_PE1;PE7_PE1	26	0	0	2.02123	0.00364678	0.146287	4.66935	2.75131	0.00163461	-0.254831	-7.40647	P04040;cRAP-P04040	CATA_HUMAN;cRAP-CATA_HUMAN	CAT;cRAP-CAT	Catalase
23.0211	22.8539	23.034	23.1596	23.1867	23.1454	23.1784	23.2648	23.1701	+	+	PE3_PE1;PE7_PE1	21	15	0	1.51507	0.0131063	0.194265	3.27848	1.63823	0.0106857	0.234775	3.58804	P04049	RAF1_HUMAN	RAF1	RAF proto-oncogene serine/threonine-protein kinase
25.0065	25.0317	24.9268	25.9547	26.0051	26.0026	25.9548	26.016	25.9915	+	+	PE3_PE1;PE7_PE1	20	20	0	5.01826	0	0.999117	28.0663	4.98619	0.000226415	0.999105	27.5508	P04062	GBA1_HUMAN	GBA1	Lysosomal acid glucosylceramidase
22.1577	22.1403	22.1181	23.6436	23.6574	23.6841	23.4616	23.5522	23.6022	+	+	PE3_PE1;PE7_PE1	15	15	0	7.07975	0	1.523	92.1277	5.28632	0.000331034	1.39995	32.7676	P04066	FUCO_HUMAN	FUCA1	Tissue alpha-L-fucosidase
27.2057	27.2556	27.4362	27.5493	27.6018	27.5081	27.3546	27.3331	27.3298	+		PE3_PE1	26	3	0	1.55674	0.0117412	0.253885	3.38139	0.221544	0.709728	0.0400117	0.567967	P04075	ALDOA_HUMAN	ALDOA	Fructose-bisphosphate aldolase A
25.9392	25.7755	25.8703	25.6908	25.7118	25.6882	25.7302	25.7614	25.6962	+	+	PE3_PE1;PE7_PE1	6	6	0	1.57596	0.011205	-0.164738	-3.42948	1.21895	0.0274832	-0.132443	-2.59442	P04080	CYTB_HUMAN	CSTB	Cystatin-B
21.9131	21.7345	21.8978	21.1611	21.1139	20.8502	21.1532	21.1545	21.2412	+	+	PE3_PE1;PE7_PE1	7	7	0	2.70038	0.000983438	-0.806728	-7.17939	3.31174	0.000854496	-0.66553	-10.372	P04114	APOB_HUMAN	APOB	Apolipoprotein B-100
20.4802	20.1757	20.2799	19.2887	19.1463	19.4346	19.4098	19.5413	19.0128	+	+	PE3_PE1;PE7_PE1	13	11	0	2.95301	0.000499369	-1.02209	-8.37013	2.25486	0.00337553	-0.99063	-5.43516	P04150	GCR_HUMAN	NR3C1	Glucocorticoid receptor
24.7456	24.6704	24.7168	24.7664	24.6984	24.6554	24.8019	24.8745	24.7955		+	PE7_PE1	11	11	0	0.0363975	0.965016	-0.0041949	-0.107448	1.5535	0.0122626	0.113032	3.37332	P04179	SODM_HUMAN	SOD2	Superoxide dismutase [Mn]
23.0194	22.9273	23.1211	24.3413	24.3244	24.3304	24.3844	24.3945	24.3682	+	+	PE3_PE1;PE7_PE1	20	20	0	4.69683	0	1.30943	23.3033	4.75277	0.000174545	1.35977	24.0705	P04181	OAT_HUMAN	OAT	Ornithine aminotransferase
22.7167	22.6573	22.8247	23.2023	23.2097	23.1636	23.3007	23.3659	23.3345	+	+	PE3_PE1;PE7_PE1	16	16	0	3.07184	0.000394213	0.458984	8.98973	3.47781	0.000844966	0.600801	11.4431	P04183	KITH_HUMAN	TK1	Thymidine kinase
27.3992	27.3005	27.3533	24.6592	24.6236	24.5844	24.5642	24.4614	24.4927	+	+	PE3_PE1;PE7_PE1	4	4	0	6.75143	0	-2.72862	-76.2554	6.55836	0.00204255	-2.84489	-68.2295	P04216	THY1_HUMAN	THY1	Thy-1 membrane glycoprotein
25.7886	25.6428	25.7291	25.2345	25.3506	25.2436	25.1301	25.1648	25.1614	+	+	PE3_PE1;PE7_PE1	9	9	0	2.85111	0.00069988	-0.443967	-7.87001	3.69269	0.000666667	-0.568085	-12.9857	P04233	HG2A_HUMAN	CD74	HLA class II histocompatibility antigen gamma chain
22.1513	22.0348	22.0522	23.2235	23.2167	23.1331	21.7511	21.7368	21.8927	+	+	PE3_PE1;PE7_PE1	18	0	0	4.74176	0	1.11167	23.9175	2.01269	0.00503889	-0.285896	-4.64301	P04264;cRAP-P04264	K2C1_HUMAN;cRAP-K2C1_HUMAN	KRT1;cRAP-KRT1	Keratin
27.1883	27.9241	27.4682	27.5728	27.1011	27.1112	27.6927	27.0224	27.0261				9	3	0	0.427689	0.265565	-0.26518	-1.00089	0.380143	0.332385	-0.279799	-0.904817	P04350	TBB4A_HUMAN	TUBB4A	Tubulin beta-4A chain
30.6729	30.6705	30.7138	30.8561	31.0196	30.9722	30.794	30.9041	30.9229	+	+	PE3_PE1;PE7_PE1	22	21	0	2.19019	0.00251314	0.263553	5.21406	1.93735	0.005804	0.18793	4.41543	P04406	G3P_HUMAN	GAPDH	Glyceraldehyde-3-phosphate dehydrogenase
22.3409	22.2506	22.3581	23.2114	23.1925	23.2134	23.1813	23.2067	23.1556	+	+	PE3_PE1;PE7_PE1	20	20	0	4.89772	0	0.889243	26.1767	4.72873	0.000171123	0.864684	23.7377	P04424	ARLY_HUMAN	ASL	Argininosuccinate lyase
25.858	25.8799	25.9699	25.6994	25.809	25.8295	25.6066	25.7434	25.6579	+	+	PE3_PE1;PE7_PE1	16	10	0	1.09538	0.034792	-0.123317	-2.32965	1.94438	0.00573725	-0.233292	-4.43631	P04439	HLAA_HUMAN	HLA-A	HLA class I histocompatibility antigen
25.5411	25.5567	25.5948	25.4458	25.5369	25.4683	25.3334	25.4202	25.3991	+	+	PE3_PE1;PE7_PE1	8	6	0	1.19429	0.0272704	-0.0805009	-2.54074	2.37947	0.0030271	-0.179956	-5.88255	P04632	CPNS1_HUMAN	CAPNS1	Calpain small subunit 1
26.7789	26.7394	26.7439	25.7964	25.7719	25.7629	25.6418	25.6355	25.6139	+	+	PE3_PE1;PE7_PE1	12	12	0	6.36673	0	-0.976963	-61.098	6.71481	0.00252632	-1.12367	-74.664	P04792	HSPB1_HUMAN	HSPB1	Heat shock protein beta-1
22.7001	22.8285	22.8151	22.6235	22.6204	22.6513	22.5467	22.7001	22.5818	+	+	PE3_PE1;PE7_PE1	11	11	0	1.62924	0.00984468	-0.14952	-3.56488	1.30231	0.0228167	-0.171701	-2.77934	P04818	TYSY_HUMAN	TYMS	Thymidylate synthase
28.485	28.4029	28.4307	28.6602	28.6672	28.6919	28.6862	28.7173	28.7073	+	+	PE3_PE1;PE7_PE1	40	40	0	3.07441	0.000395465	0.233597	9.00358	3.28992	0.000911147	0.264073	10.2385	P04843	RPN1_HUMAN	RPN1	Dolichyl-diphosphooligosaccharide--protein glycosyltransferase subunit 1
26.9742	26.9361	26.9218	26.9661	26.9665	26.9493	26.9729	27.0279	27.0017		+	PE7_PE1	22	22	0	0.42566	0.267826	0.0166079	0.996824	1.19749	0.0286387	0.0567938	2.54767	P04844	RPN2_HUMAN	RPN2	Dolichyl-diphosphooligosaccharide--protein glycosyltransferase subunit 2
26.4768	26.3758	26.426	26.2403	26.2778	26.2147	26.2155	26.2845	26.198	+	+	PE3_PE1;PE7_PE1	18	10	0	2.21057	0.00246438	-0.18192	-5.28292	2.10079	0.00431576	-0.193518	-4.92011	P04899	GNAI2_HUMAN	GNAI2	Guanine nucleotide-binding protein G(i) subunit alpha-2
27.0716	28.8408	29.5844	22.6023	23.3095	26.1827	23.8273	27.1603	28.5295	+		PE3_PE1	2	0	0	1.55346	0.0119345	-4.46744	-3.37322	0.558494	0.166544	-1.99324	-1.25935	P04908;Q7L7L0	H2A1B_HUMAN;H2A3_HUMAN	H2AC25;H2AC4	Histone H2A type 1-B/E
21.9823	21.8336	21.6841	21.8658	21.8807	21.6724	21.8419	21.8218	21.8712				19	18	0	0.088012	0.91334	-0.027036	-0.247703	0.0456037	0.957507	0.011645	0.133401	P04920	B3A2_HUMAN	SLC4A2	Anion exchange protein 2
21.013	21.3667	21.2387	21.5734	21.5803	21.4815	21.7567	21.3792	21.3616	+		PE3_PE1	1	1	0	1.45481	0.0151306	0.338929	3.13279	0.821537	0.0767967	0.293011	1.77351	P04921	GLPC_HUMAN	GYPC	Glycophorin-C
21.2722	21.078	21.2649	19.4981	19.6022	19.2869	19.7724	19.6202	19.5484	+	+	PE3_PE1;PE7_PE1	5	5	0	3.99512	0	-1.74264	-15.4999	4.15356	0.000334038	-1.55804	-16.9997	P05019	IGF1_HUMAN	IGF1	Insulin-like growth factor I
25.4757	25.4922	25.5259	25.0727	25.1223	25.0608	25.0367	25.0937	25.0702	+	+	PE3_PE1;PE7_PE1	50	30	0	4.17762	0	-0.412685	-17.2394	4.38303	0.000245524	-0.431054	-19.4261	P05023	AT1A1_HUMAN	ATP1A1	Sodium/potassium-transporting ATPase subunit alpha-1
17.923	17.9704	18.0099	17.4269	10.4748	17.3943	17.0832	17.6455	16.8564		+	PE7_PE1	4	4	1	0.549074	0.166623	-2.8691	-1.24092	1.51392	0.0134054	-0.772724	-3.27566	P05062	ALDOB_HUMAN	ALDOB	Fructose-bisphosphate aldolase B
21.7959	21.7074	21.7484	22.0005	22.0011	22.0457	21.8741	21.8531	21.8456	+	+	PE3_PE1;PE7_PE1	21	20	0	3.06443	0.000391207	0.265223	8.94993	1.78147	0.007834	0.10706	3.96993	P05067	A4_HUMAN	APP	Amyloid-beta precursor protein
24.5819	24.5499	24.634	23.9528	24.0395	23.9857	24.0574	24.02	23.9735	+	+	PE3_PE1;PE7_PE1	7	7	0	4.14685	0	-0.595968	-16.9333	4.11062	0.000325103	-0.571677	-16.5797	P05114	HMGN1_HUMAN	HMGN1	Non-histone chromosomal protein HMG-14
29.0245	28.9743	29.0104	28.9223	28.953	28.9066	28.9949	29.0265	29.0029	+		PE3_PE1	23	8	0	1.69903	0.00837281	-0.0757656	-3.74711	0.102542	0.892836	0.00504557	0.28514	P05141	ADT2_HUMAN	SLC25A5	ADP/ATP translocase 2
14.1713	13.8084	13.5743	14.4321	13.7801	14.8217	14.8454	15.2403	14.8988		+	PE7_PE1	1	1	0	0.635513	0.124026	0.493313	1.40957	2.23405	0.00336572	1.14351	5.3632	P05160	F13B_HUMAN	F13B	Coagulation factor XIII B chain
24.2572	24.1993	24.2222	25.6908	25.6976	25.6133	25.4865	25.5485	25.5034	+	+	PE3_PE1;PE7_PE1	7	7	0	5.8457	0	1.44104	45.249	6.0685	0.000914286	1.28658	51.4506	P05161	ISG15_HUMAN	ISG15	Ubiquitin-like protein ISG15
19.9458	20.2129	20.1976	20.2158	20.2493	20.0251	19.8645	20.0481	20.187				21	21	0	0.149329	0.838633	0.0445862	0.400819	0.268864	0.589879	-0.0855904	-0.671937	P05165	PCCA_HUMAN	PCCA	Propionyl-CoA carboxylase alpha chain
23.3783	23.3709	23.2161	22.924	22.9774	22.8959	23.0692	23.0525	23.1415	+	+	PE3_PE1;PE7_PE1	18	18	0	2.59052	0.00115753	-0.389336	-6.71027	1.7677	0.00797327	-0.234046	-3.93211	P05166	PCCB_HUMAN	PCCB	Propionyl-CoA carboxylase beta chain
16.2512	15.5952	15.6557	15.2488	16.188	16.1054	15.1911	17.1859	15.9605				1	1	2	0.0120425	0.988811	0.0133489	0.0364739	0.170474	0.802346	0.27846	0.451017	P05186	PPBT_HUMAN	ALPL	Alkaline phosphatase
25.8112	25.809	25.8399	25.8768	25.9405	25.9151	25.8287	25.8615	25.8114	+		PE3_PE1	26	26	0	1.90405	0.00511578	0.0907427	4.31746	0.320465	0.445962	0.0138696	0.781614	P05198	IF2A_HUMAN	EIF2S1	Eukaryotic translation initiation factor 2 subunit 1
22.4129	22.4498	22.3271	21.6532	21.6778	21.8909	21.8291	21.9448	22.0583	+	+	PE3_PE1;PE7_PE1	2	2	0	2.84283	0.000697379	-0.655986	-7.8306	2.40972	0.00278109	-0.452557	-5.99561	P05204	HMGN2_HUMAN	HMGN2	Non-histone chromosomal protein HMG-17
25.3926	25.4286	25.3817	25.5838	25.5759	25.5469	25.4904	25.5698	25.5329	+	+	PE3_PE1;PE7_PE1	19	19	0	3.12781	0.000305243	0.167886	9.29599	2.07137	0.00443318	0.130047	4.82621	P05362	ICAM1_HUMAN	ICAM1	Intercellular adhesion molecule 1
28.448	28.4406	28.4005	28.2684	28.2559	28.2477	28.2559	28.2569	28.2358	+	+	PE3_PE1;PE7_PE1	8	7	0	3.38217	0.000188596	-0.172415	-10.8141	3.42115	0.000925074	-0.180208	-11.0664	P05387	RLA2_HUMAN	RPLP2	Large ribosomal subunit protein P2
27.4704	27.4511	27.4191	27.3218	27.3574	27.3309	27.3165	27.2886	27.3394	+	+	PE3_PE1;PE7_PE1	11	3	0	2.41065	0.00154749	-0.110148	-5.99911	2.48921	0.00250827	-0.132053	-6.30142	P05388	RLA0_HUMAN	RPLP0	Large ribosomal subunit protein uL10
22.0098	21.9812	21.8247	21.9408	21.913	21.9181	21.9319	21.7369	21.7634				15	15	0	0.0892668	0.912192	-0.0145969	-0.250968	0.693849	0.108869	-0.127799	-1.52322	P05423	RPC4_HUMAN	POLR3D	DNA-directed RNA polymerase III subunit RPC4
19.106	19.1421	19.3582	18.4038	18.2085	18.4663	18.0451	17.9629	17.7762	+	+	PE3_PE1;PE7_PE1	4	4	0	2.79807	0.000803107	-0.842552	-7.62051	3.46913	0.000839779	-1.27401	-11.3846	P05452	TETN_HUMAN	CLEC3B	Tetranectin
27.1955	27.2662	27.2154	27.3293	27.3731	27.3635	27.1875	27.2531	27.2509	+		PE3_PE1	31	31	0	2.18809	0.00250884	0.129592	5.207	0.0552767	0.947072	0.00481923	0.1602	P05455	LA_HUMAN	SSB	Lupus La protein
19.8936	19.2664	19.5938	18.5072	18.7272	18.5719	18.7051	18.4522	18.7501	+	+	PE3_PE1;PE7_PE1	4	4	0	2.15713	0.00259791	-0.982494	-5.10378	2.01932	0.00499346	-0.948762	-4.66345	P05543	THBG_HUMAN	SERPINA7	Thyroxine-binding globulin
20.4154	20.078	20.7048	20.1092	18.4645	19.8609	20.3629	20.1252	20.1163				1	1	0	0.782398	0.0794488	-0.921193	-1.69643	0.426252	0.270019	-0.197926	-0.998012	P05546	HEP2_HUMAN	SERPIND1	Heparin cofactor 2
23.4352	23.467	23.4696	23.7276	23.6939	23.7057	23.5551	23.6554	23.5308	+	+	PE3_PE1;PE7_PE1	24	24	0	4.15351	0	0.251767	16.9992	1.44203	0.0160881	0.123155	3.10236	P05556	ITB1_HUMAN	ITGB1	Integrin beta-1
24.2797	24.258	24.417	24.4495	24.539	24.4984	24.3738	24.5107	24.4368	+		PE3_PE1	14	14	0	1.46693	0.0147442	0.177397	3.1618	0.895929	0.0628625	0.12216	1.92132	P06132	DCUP_HUMAN	UROD	Uroporphyrinogen decarboxylase
20.7843	20.8146	20.813	22.6223	22.627	22.6375	22.6244	22.625	22.5663	+	+	PE3_PE1;PE7_PE1	46	42	0	8.13126	0	1.82496	168.782	6.88818	0.004	1.80125	82.5043	P06213	INSR_HUMAN	INSR	Insulin receptor
19.8601	19.0108	19.6826	20.7491	20.7477	20.5983	20.9696	20.7814	20.6998	+	+	PE3_PE1;PE7_PE1	2	2	0	1.95947	0.00413281	1.18054	4.48138	2.06288	0.00457682	1.29912	4.79937	P06276	CHLE_HUMAN	BCHE	Cholinesterase
22.3947	22.2242	22.2576	22.3668	22.4403	22.3486	22.4844	22.4074	22.5586		+	PE7_PE1	13	13	0	0.718836	0.0964776	0.0930913	1.57197	1.31727	0.0216049	0.191332	2.81309	P06280	AGAL_HUMAN	GLA	Alpha-galactosidase A
22.3567	22.3121	22.3425	22.9466	22.9521	22.8987	22.7633	22.7322	22.6328	+	+	PE3_PE1;PE7_PE1	24	0	0	4.99831	0	0.595384	27.7446	3.06845	0.00116809	0.372337	8.9715	P06396;cRAP-P06396	GELS_HUMAN;cRAP-GELS_HUMAN	GSN;cRAP-GSN	Gelsolin
26.5159	26.6821	26.6467	27.2942	27.305	27.3273	27.4355	27.1424	27.5506	+	+	PE3_PE1;PE7_PE1	6	6	0	3.7574	8.80057e-05	0.69396	13.4881	2.35298	0.00310523	0.761255	5.785	P06454	PTMA_HUMAN	PTMA	Prothymosin alpha
25.8569	25.8476	25.9003	25.4158	25.4529	25.4369	25.4824	25.5028	25.4925	+	+	PE3_PE1;PE7_PE1	17	16	0	4.61573	0	-0.433091	-22.2337	4.57628	0.000148607	-0.375739	-21.731	P06493	CDK1_HUMAN	CDK1	Cyclin-dependent kinase 1
28.3906	28.3981	28.4632	28.716	28.7305	28.713	28.6679	28.7426	28.7212	+	+	PE3_PE1;PE7_PE1	25	25	0	3.66489	8.25566e-05	0.302537	12.7755	3.10411	0.00118898	0.293292	9.16515	P06576	ATPB_HUMAN	ATP5F1B	ATP synthase subunit beta
21.4036	21.5282	21.2582	21.3113	21.5337	21.2447	21.6352	21.748	21.6999		+	PE7_PE1	1	1	0	0.102598	0.895678	-0.0334218	-0.285281	1.61134	0.0111976	0.297702	3.51904	P06703	S10A6_HUMAN	S100A6	Protein S100-A6
19.2028	17.7833	18.8488	19.1939	19.2742	18.6829	19.7364	19.7755	18.8915				1	1	1	0.399103	0.298702	0.438702	0.943318	0.765211	0.0887693	0.856166	1.6627	P06727	APOA4_HUMAN	APOA4	Apolipoprotein A-IV
25.4314	25.3936	25.3741	25.344	25.2892	25.2527	25.2805	25.3734	25.419	+		PE3_PE1	9	8	0	1.53248	0.0125972	-0.104387	-3.32125	0.404593	0.296562	-0.0420742	-0.954417	P06730	IF4E_HUMAN	EIF4E	Eukaryotic translation initiation factor 4E
29.5862	29.5699	29.5844	30.4469	30.4763	30.47	30.3416	30.3782	30.4132	+	+	PE3_PE1;PE7_PE1	30	27	0	6.95453	0	0.884212	85.7178	5.51553	0.000446512	0.797476	37.4028	P06733	ENOA_HUMAN	ENO1	Alpha-enolase
18.9847	18.4902	17.4451	19.3846	18.8628	19.3544	19.2414	19.2578	19.1091				9	9	1	0.858041	0.0644133	0.89392	1.8458	0.917276	0.0594901	0.896107	1.96411	P06737	PYGL_HUMAN	PYGL	Glycogen phosphorylase
27.6155	27.5755	27.6118	27.7441	27.7957	27.774	27.6915	27.7477	27.789	+	+	PE3_PE1;PE7_PE1	25	24	0	3.01058	0.000418866	0.170314	8.66522	1.9899	0.00523052	0.141768	4.57329	P06744	G6PI_HUMAN	GPI	Glucose-6-phosphate isomerase
22.1711	22.1608	22.1356	21.8259	21.8349	21.8263	21.9437	21.9562	21.8891	+	+	PE3_PE1;PE7_PE1	20	20	0	5.1272	0	-0.326785	-29.8902	3.21134	0.00105382	-0.226144	-9.77103	P06746	DPOLB_HUMAN	POLB	DNA polymerase beta
29.3341	29.4221	29.4397	29.5048	29.5365	29.5255	29.4181	29.5225	29.555	+		PE3_PE1	12	12	0	1.65799	0.00925764	0.123615	3.63925	0.883867	0.0650011	0.0999063	1.89722	P06748	NPM_HUMAN	NPM1	Nucleophosmin
27.3894	27.1255	27.4223	26.862	26.881	26.8381	26.7286	26.9068	26.8412	+	+	PE3_PE1;PE7_PE1	7	7	0	2.05401	0.00344313	-0.452075	-4.77147	1.97703	0.00528794	-0.486866	-4.53426	P06753	TPM3_HUMAN	TPM3	Tropomyosin alpha-3 chain
20.1212	19.3924	19.7462	20.6597	20.5446	20.6757	20.7836	20.6247	20.6817	+	+	PE3_PE1;PE7_PE1	20	20	0	1.81853	0.00612941	0.873389	4.0729	1.92461	0.00595642	0.943392	4.37777	P06756	ITAV_HUMAN	ITGAV	Integrin alpha-V
24.422	24.5143	24.4856	24.3545	24.3673	24.2966	24.2504	24.3139	24.248	+	+	PE3_PE1;PE7_PE1	20	20	0	1.73967	0.00747714	-0.134482	-3.8559	2.36869	0.00309068	-0.203208	-5.84271	P06865	HEXA_HUMAN	HEXA	Beta-hexosaminidase subunit alpha
24.2878	24.1537	24.1799	24.6055	24.6077	24.5527	24.6498	24.6782	24.6885	+	+	PE3_PE1;PE7_PE1	19	19	0	2.9816	0.000506826	0.381478	8.5155	3.39709	0.000906883	0.465024	10.91	P07099	HYEP_HUMAN	EPHX1	Epoxide hydrolase 1
27.0275	26.971	27.1119	26.9941	27.0233	26.9624	26.8343	26.8763	26.7047		+	PE7_PE1	7	7	0	0.415736	0.278466	-0.0435263	-0.976884	1.60983	0.0112146	-0.231682	-3.51517	P07108	ACBP_HUMAN	DBI	Acyl-CoA-binding protein
29.2808	29.244	29.3043	29.3387	29.3078	29.2736	29.2964	29.3476	29.3286				20	20	0	0.518074	0.185328	0.0303548	1.18013	0.972297	0.0508614	0.0478287	2.07531	P07195	LDHB_HUMAN	LDHB	L-lactate dehydrogenase B chain
20.9785	21.102	21.0853	21.6506	21.7091	21.5074	21.6778	21.6408	21.6811	+	+	PE3_PE1;PE7_PE1	11	11	0	2.86803	0.000655685	0.567143	7.95115	3.93783	0.000388007	0.611327	14.99	P07199	CENPB_HUMAN	CENPB	Major centromere autoantigen B
23.9428	23.9032	23.9176	20.2512	20.2262	20.0985	20.3322	20.2017	19.8629	+	+	PE3_PE1;PE7_PE1	11	11	0	6.75952	0	-3.72928	-76.6117	4.95144	0.000216704	-3.78897	-27.0027	P07203	GPX1_HUMAN	GPX1	Glutathione peroxidase 1
21.3951	21.3365	20.9886	20.9163	20.3024	20.3932	20.857	20.8812	21.1197	+		PE3_PE1	5	5	0	1.42462	0.0161835	-0.702745	-3.06115	0.880263	0.0655499	-0.287412	-1.89003	P07205	PGK2_HUMAN	PGK2	Phosphoglycerate kinase 2
25.1376	25.4036	25.3665	21.3528	21.1953	21.4089	21.662	21.5444	21.3404	+	+	PE3_PE1;PE7_PE1	13	13	0	5.5417	0	-3.98359	-37.9718	5.14379	0.000262295	-3.78701	-30.1781	P07225	PROS_HUMAN	PROS1	Vitamin K-dependent protein S
29.4956	29.4709	29.4761	30.194	30.2254	30.2043	30.2483	30.293	30.2878	+	+	PE3_PE1;PE7_PE1	48	48	0	6.36341	0	0.727027	60.9813	6.00763	0.000842105	0.795481	49.6768	P07237	PDIA1_HUMAN	P4HB	Protein disulfide-isomerase
21.2278	21.1929	20.9891	21.5512	21.5804	21.5521	21.5324	21.5724	21.6145	+	+	PE3_PE1;PE7_PE1	6	6	0	2.31811	0.00196569	0.424644	5.65863	2.29834	0.00318335	0.436486	5.588	P07311	ACYP1_HUMAN	ACYP1	Acylphosphatase-1
26.0138	25.9492	25.9597	26.8506	26.8329	26.8507	26.3952	26.4262	26.3564	+	+	PE3_PE1;PE7_PE1	18	0	0	5.70442	0	0.870528	41.7087	3.90661	0.000377358	0.418387	14.719	P07339;cRAP-P07339	CATD_HUMAN;cRAP-CATD_HUMAN	CTSD;cRAP-CTSD	Cathepsin D
27.0348	26.9964	27.0105	26.6542	26.6777	26.6557	26.5779	26.6073	26.5865	+	+	PE3_PE1;PE7_PE1	22	6	0	4.88232	0	-0.351372	-25.9445	5.12219	0.00025876	-0.423365	-29.8039	P07355	ANXA2_HUMAN	ANXA2	Annexin A2
19.8401	20.037	19.8659	20.0518	19.9157	19.6235	19.9878	20.5428	19.4445				2	2	0	0.132678	0.860246	-0.0506903	-0.360429	0.0848412	0.911798	0.0773417	0.239426	P07358	CO8B_HUMAN	C8B	Complement component C8 beta chain
24.8041	24.7683	24.8309	24.5141	24.5494	24.5255	24.4431	24.4453	24.4598	+	+	PE3_PE1;PE7_PE1	35	35	0	3.69198	8.41248e-05	-0.27146	-12.9803	4.31034	0.000229391	-0.35172	-18.6229	P07384	CAN1_HUMAN	CAPN1	Calpain-1 catalytic subunit
29.2858	29.4374	29.5291	29.4326	29.4384	29.4671	29.3025	29.365	29.3958				25	5	0	0.14854	0.839594	0.028614	0.398924	0.342788	0.397213	-0.0629807	-0.828097	P07437	TBB5_HUMAN	TUBB	Tubulin beta chain
16.899	18.3898	19.0758	18.5682	18.1633	18.3266	18.8807	17.8983	18.4944				1	1	2	0.130037	0.862608	0.231197	0.353948	0.161915	0.815058	0.302965	0.430838	P07451	CAH3_HUMAN	CA3	Carbonic anhydrase 3
27.2369	27.3657	27.4299	27.5911	27.6949	27.6054	27.7014	27.8162	27.7842	+	+	PE3_PE1;PE7_PE1	25	25	0	1.92529	0.00474357	0.286338	4.37977	2.51045	0.00237657	0.4231	6.38532	P07602	SAP_HUMAN	PSAP	Prosaposin
24.7894	24.7695	24.7986	24.708	24.6875	24.6878	24.7121	24.7383	24.7598	+	+	PE3_PE1;PE7_PE1	20	20	0	2.95206	0.00049895	-0.0914186	-8.36532	1.40917	0.017133	-0.049139	-3.02481	P07686	HEXB_HUMAN	HEXB	Beta-hexosaminidase subunit beta
28.7537	28.8606	28.8597	28.8617	29.0034	28.9098	28.7599	28.9166	28.8942				11	11	0	0.852591	0.06512	0.100322	1.83498	0.206371	0.740553	0.0322584	0.533794	P07737	PROF1_HUMAN	PFN1	Profilin-1
20.5161	20.2748	20.542	21.1798	21.3137	21.2126	21.1751	21.2163	21.1953	+	+	PE3_PE1;PE7_PE1	12	12	0	2.95938	0.000501901	0.791053	8.4023	3.02575	0.0012699	0.751287	8.74458	P07738	PMGE_HUMAN	BPGM	Bisphosphoglycerate mutase
27.409	27.3052	27.3994	26.0425	25.9766	25.9742	26.0355	26.0107	26.0478	+	+	PE3_PE1;PE7_PE1	12	12	0	5.36885	0	-1.37342	-34.3667	5.5626	0.000475248	-1.33989	-38.4324	P07741	APT_HUMAN	APRT	Adenine phosphoribosyltransferase
18.9026	19.0235	19.4233	23.8146	23.8541	23.8479	23.8593	23.8779	23.877	+	+	PE3_PE1;PE7_PE1	7	7	0	5.12913	0	4.72244	29.9236	5.14497	0.000263014	4.75495	30.1986	P07766	CD3E_HUMAN	CD3E	T-cell surface glycoprotein CD3 epsilon chain
25.8708	25.8708	25.8916	25.8329	25.8671	25.8456	25.8626	25.8645	25.8826	+		PE3_PE1	94	93	0	1.13096	0.0318833	-0.0292269	-2.40484	0.345373	0.39234	-0.00784938	-0.833445	P07814	SYEP_HUMAN	EPRS1	Bifunctional glutamate/proline--tRNA ligase
25.1838	25.2411	25.3052	25.5174	25.5628	25.512	25.4827	25.5434	25.4752	+	+	PE3_PE1;PE7_PE1	13	13	0	2.76067	0.000921203	0.287354	7.44888	2.47426	0.00247733	0.257055	6.24293	P07858	CATB_HUMAN	CTSB	Cathepsin B
30.1098	30.1134	30.1477	30.0413	30.0922	30.0546	30.139	30.1496	30.1806	+		PE3_PE1	50	27	0	1.45468	0.0151274	-0.0609093	-3.13247	0.879412	0.0656921	0.0327791	1.88833	P07900	HS90A_HUMAN	HSP90AA1	Heat shock protein HSP 90-alpha
20.5724	20.4761	20.5158	20.8918	20.6709	20.8434	20.8422	20.7439	20.8359	+	+	PE3_PE1;PE7_PE1	12	12	0	1.74242	0.00745012	0.280608	3.86334	2.60169	0.00209591	0.285925	6.75672	P07902	GALT_HUMAN	GALT	Galactose-1-phosphate uridylyltransferase
27.9132	27.9167	27.8892	27.7833	27.8089	27.7625	27.7062	27.764	27.7452	+	+	PE3_PE1;PE7_PE1	18	8	0	2.79773	0.000802795	-0.121474	-7.61897	3.03519	0.00128578	-0.167894	-8.79428	P07910	HNRPC_HUMAN	HNRNPC	Heterogeneous nuclear ribonucleoproteins C1/C2
25.121	25.2217	25.2053	25.2176	25.2727	25.2806	25.2329	25.2884	25.3033		+	PE7_PE1	4	3	0	0.941369	0.0510513	0.0743688	2.01264	1.14677	0.0329791	0.0922743	2.4385	P07919	QCR6_HUMAN	UQCRH	Cytochrome b-c1 complex subunit 6
20.7289	20.2727	20.887	20.717	20.5056	21.0806	20.7507	20.8771	20.7361				6	5	0	0.215483	0.728618	0.138164	0.55437	0.346525	0.390095	0.158407	0.835829	P07947	YES_HUMAN	YES1	Tyrosine-protein kinase Yes
26.127	26.0512	26.0906	26.4674	26.378	26.3889	26.3752	26.3347	26.4113	+	+	PE3_PE1;PE7_PE1	23	19	0	3.07793	0.000396724	0.321882	9.02259	3.0972	0.00118611	0.284161	9.12733	P07948	LYN_HUMAN	LYN	Tyrosine-protein kinase Lyn
18.6593	19.6185	19.808	19.6319	19.2795	19.3229	19.987	19.8951	19.0609				1	1	1	0.0454196	0.957767	0.0494925	0.132886	0.244497	0.656261	0.285726	0.618859	P07951	TPM2_HUMAN	TPM2	Tropomyosin beta chain
26.4895	26.4703	26.5038	26.4116	26.4394	26.4286	26.3781	26.4679	26.4888	+		PE3_PE1	22	22	0	2.07922	0.00324063	-0.0613505	-4.85114	0.536247	0.179281	-0.0429471	-1.2158	P07954	FUMH_HUMAN	FH	Fumarate hydratase
22.0005	21.8879	22.0704	22.2797	22.0687	22.1565	22.1439	22.2575	22.2768	+	+	PE3_PE1;PE7_PE1	13	13	0	1.055	0.0386424	0.182042	2.24528	1.62612	0.0108397	0.23981	3.55684	P07992	ERCC1_HUMAN	ERCC1	DNA excision repair protein ERCC-1
23.9297	23.8991	23.9663	21.3574	21.2601	21.3691	21.4921	21.6895	21.5199	+	+	PE3_PE1;PE7_PE1	30	27	0	6.49188	0	-2.60279	-65.6661	5.47604	0.000415584	-2.36453	-36.5601	P07996	TSP1_HUMAN	THBS1	Thrombospondin-1
21.1871	21.2348	21.4044	21.0052	21.2163	20.8793	21.1282	21.1276	21.1808	+		PE3_PE1	5	5	0	0.956387	0.0489279	-0.241837	-2.04302	0.886815	0.0644432	-0.129924	-1.9031	P08047	SP1_HUMAN	SP1	Transcription factor Sp1
19.3882	19.2832	17.6907	19.2936	19.6879	19.6832	19.4321	19.5427	19.4108				5	5	1	0.609923	0.135266	0.76756	1.35972	0.540862	0.176958	0.67451	1.22484	P08069	IGF1R_HUMAN	IGF1R	Insulin-like growth factor 1 receptor
28.3055	28.286	28.2882	28.3553	28.3867	28.3161	28.3053	28.3788	28.3801	+	+	PE3_PE1;PE7_PE1	58	58	0	1.30497	0.0209493	0.0594521	2.78532	1.13458	0.0339462	0.0614567	2.41253	P08133	ANXA6_HUMAN	ANXA6	Annexin A6
23.0356	23.0094	22.9846	23.3523	23.2505	23.2547	23.32	23.2998	23.3037	+	+	PE3_PE1;PE7_PE1	1	1	0	2.79114	0.00080031	0.27597	7.58845	4.31437	0.00022994	0.297965	18.6665	P08134	RHOC_HUMAN	RHOC	Rho-related GTP-binding protein RhoC
19.8005	19.3917	19.9062	17.7931	17.6469	17.5418	17.2126	17.6335	17.3724	+	+	PE3_PE1;PE7_PE1	9	9	0	3.52809	0.000150577	-2.03888	-11.7875	3.48857	0.000849689	-2.2933	-11.516	P08174	DAF_HUMAN	CD55	Complement decay-accelerating factor
24.8512	24.852	24.8111	23.9329	24.0249	23.9411	24.1009	24.0932	24.0706	+	+	PE3_PE1;PE7_PE1	22	22	0	4.94714	0	-0.871786	-26.9357	5.87369	0.000705882	-0.749842	-45.9853	P08195	4F2_HUMAN	SLC3A2	Amino acid transporter heavy chain SLC3A2
25.5383	25.4989	25.5504	25.1096	25.1747	25.0995	25.2967	25.2701	25.2665	+	+	PE3_PE1;PE7_PE1	22	22	0	3.84689	9.45122e-05	-0.401235	-14.2138	3.79616	0.000627389	-0.251413	-13.7979	P08236	BGLR_HUMAN	GUSB	Beta-glucuronidase
24.9239	24.9242	24.9	24.7997	24.8173	24.841	24.7802	24.7671	24.8193	+	+	PE3_PE1;PE7_PE1	32	31	0	2.59197	0.00115833	-0.096688	-6.71626	2.70806	0.00173197	-0.127142	-7.21323	P08237	PFKAM_HUMAN	PFKM	ATP-dependent 6-phosphofructokinase
29.7834	29.7551	29.7896	29.8756	29.8292	29.8399	29.8243	29.8849	29.8428	+	+	PE3_PE1;PE7_PE1	40	23	0	1.82981	0.00593742	0.0721601	4.10457	1.63624	0.0107273	0.0746047	3.5829	P08238	HS90B_HUMAN	HSP90AB1	Heat shock protein HSP 90-beta
25.0519	25.0064	25.0718	25.3964	25.4676	25.4258	25.3231	25.3767	25.401	+	+	PE3_PE1;PE7_PE1	33	33	0	3.77929	9.01818e-05	0.386602	13.6622	3.37387	0.000893447	0.323592	10.7611	P08240	SRPRA_HUMAN	SRPRA	Signal recognition particle receptor subunit alpha
25.1473	25.0394	25.1307	24.5811	24.648	24.6224	24.7796	24.8304	24.8389	+	+	PE3_PE1;PE7_PE1	28	28	0	3.64115	8.1205e-05	-0.488639	-12.5985	2.78421	0.00158803	-0.289459	-7.55652	P08243	ASNS_HUMAN	ASNS	Asparagine synthetase [glutamine-hydrolyzing]
18.5275	16.731	18.303	19.6281	19.3885	19.173	19.3199	18.5585	19.1673	+		PE3_PE1	1	0	1	1.24825	0.0240231	1.54269	2.65879	0.885474	0.0645199	1.1614	1.90043	P08263;cRAP-P08263;P09210	GSTA1_HUMAN;GSTA2_HUMAN;cRAP-GSTA1_HUMAN	GSTA1;GSTA2;cRAP-GSTA1	Glutathione S-transferase A1
22.4255	22.3096	22.4017	22.6232	22.6645	22.6375	22.6005	22.5689	22.5709	+	+	PE3_PE1;PE7_PE1	14	14	0	2.66708	0.000967765	0.262823	7.03427	2.26445	0.00335719	0.201206	5.46857	P08397	HEM3_HUMAN	HMBS	Porphobilinogen deaminase
25.0287	25.0162	25.103	25.3743	25.3694	25.3138	25.27	25.3255	25.3508	+	+	PE3_PE1;PE7_PE1	22	18	0	3.09228	0.000341912	0.303202	9.1005	2.74398	0.00167474	0.266168	7.37337	P08559	ODPA_HUMAN	PDHA1	Pyruvate dehydrogenase E1 component subunit alpha
23.2242	23.2854	23.3256	20.7093	20.6546	20.7963	21.1687	21.0027	21.0892	+	+	PE3_PE1;PE7_PE1	8	8	0	6.03347	0	-2.55833	-50.422	5.58552	0.000494845	-2.19152	-38.9441	P08567	PLEK_HUMAN	PLEK	Pleckstrin
25.9604	25.874	25.8928	26.0022	26.0307	26.0087	25.9535	25.9981	26.0113	+	+	PE3_PE1;PE7_PE1	13	13	0	1.71772	0.00801415	0.10479	3.79689	1.17202	0.0309285	0.0785478	2.49263	P08574	CY1_HUMAN	CYC1	Cytochrome c1
23.6448	23.5635	23.6528	23.4135	23.353	23.2721	23.3301	23.3721	23.3877	+	+	PE3_PE1;PE7_PE1	9	9	0	2.27103	0.00210228	-0.27419	-5.49161	2.81831	0.00158106	-0.257112	-7.7149	P08579	RU2B_HUMAN	SNRPB2	U2 small nuclear ribonucleoprotein B''
17.6343	17.9732	18.3342	18.7367	16.8623	16.7988	18.1617	18.4721	18.4531				2	0	0	0.315696	0.456423	-0.514664	-0.771614	0.77999	0.08514	0.381748	1.6917	P08590;P05976	MYL1_HUMAN;MYL3_HUMAN	MYL1;MYL3	Myosin light chain 1/3
25.4278	25.4218	25.4062	25.2787	25.3167	25.3555	25.3393	25.3544	25.3049	+	+	PE3_PE1;PE7_PE1	20	20	0	1.93312	0.00453531	-0.101659	-4.40288	2.23226	0.00336071	-0.0857684	-5.35707	P08621	RU17_HUMAN	SNRNP70	U1 small nuclear ribonucleoprotein 70 kDa
15.1483	14.7347	17.5318	14.5745	14.5972	14.8692	14.5171	14.5296	14.8735				3	2	1	0.570437	0.154433	-1.12462	-1.28269	0.591909	0.148436	-1.16489	-1.32461	P08651	NFIC_HUMAN	NFIC	Nuclear factor 1 C-type
28.9406	28.9913	29.0085	29.5834	29.6244	29.6271	29.4683	29.5229	29.5238	+	+	PE3_PE1;PE7_PE1	50	40	0	4.84901	0	0.631531	25.4492	4.35724	0.000238806	0.524867	19.1374	P08670	VIME_HUMAN	VIM	Vimentin
23.3142	23.0603	23.3632	22.6265	22.4927	22.4833	22.8246	22.8303	22.691	+	+	PE3_PE1;PE7_PE1	3	3	0	2.6124	0.00109757	-0.711727	-6.80152	1.94817	0.00556757	-0.46395	-4.44759	P08697	A2AP_HUMAN	SERPINF2	Alpha-2-antiplasmin
25.7909	25.7864	25.83	25.824	25.8702	25.8187	25.8222	25.8713	25.9163		+	PE7_PE1	11	11	0	0.755014	0.0864183	0.0352402	1.64272	1.04001	0.0427102	0.0675112	2.21419	P08708	RS17_HUMAN	RPS17	Small ribosomal subunit protein eS17
24.0471	24.0668	24.1058	23.3922	23.4176	23.343	23.4193	23.4562	23.4721	+	+	PE3_PE1;PE7_PE1	6	6	0	4.79912	0	-0.689021	-24.7251	4.93875	0.000214286	-0.624055	-26.8052	P08754	GNAI3_HUMAN	GNAI3	Guanine nucleotide-binding protein G(i) subunit alpha-3
27.456	27.4146	27.3991	27.9546	27.9284	27.8746	27.5399	27.45	27.4362	+		PE3_PE1	23	0	0	4.16155	0	0.495975	17.0789	0.641563	0.126398	0.0521463	1.42136	P08758;cRAP-P08758	ANXA5_HUMAN;cRAP-ANXA5_HUMAN	ANXA5;cRAP-ANXA5	Annexin A5
18.7127	18.8319	18.7331	18.7355	18.8442	18.6908	18.8549	19.016	18.7819				7	7	0	0.0135954	0.986763	-0.00240707	-0.0411075	0.731103	0.0976643	0.125027	1.59594	P08842	STS_HUMAN	STS	Steryl-sulfatase
28.2522	28.2648	28.1956	28.1104	28.1421	28.1341	28.1447	28.1763	28.1459	+	+	PE3_PE1;PE7_PE1	14	2	0	2.0172	0.00367152	-0.108668	-4.65691	1.58674	0.0116897	-0.0818895	-3.45662	P08865	RSSA_HUMAN	RPSA	Small ribosomal subunit protein uS2
21.5349	22.1957	22.1635	21.6055	21.7707	21.8452	21.0722	21.47	21.4604		+	PE7_PE1	2	2	0	0.42228	0.271155	-0.224219	-0.990039	1.17691	0.0305054	-0.63049	-2.50316	P08962	CD63_HUMAN	CD63	CD63 antigen
23.4931	23.423	23.3884	23.4777	23.5436	23.526	23.5395	23.4897	23.5248	+	+	PE3_PE1;PE7_PE1	17	17	0	1.0395	0.0401076	0.0809256	2.21313	1.14544	0.0330766	0.0832024	2.43567	P09001	RM03_HUMAN	MRPL3	Large ribosomal subunit protein uL3m
25.5235	25.493	25.5047	25.3453	25.3294	25.2845	25.2871	25.2847	25.2967	+	+	PE3_PE1;PE7_PE1	12	10	0	3.11715	0.000346369	-0.187344	-9.23692	4.64502	0.000156863	-0.217578	-22.6143	P09012	SNRPA_HUMAN	SNRPA	U1 small nuclear ribonucleoprotein A
19.8323	19.7777	19.5376	19.3589	19.8736	19.7711	19.5537	20.075	19.9155				4	4	0	0.0945181	0.905311	-0.0480092	-0.264564	0.300376	0.498097	0.13221	0.739312	P09038	FGF2_HUMAN	FGF2	Fibroblast growth factor 2
21.9799	21.7448	21.8738	21.4264	21.5683	21.5405	21.582	21.5877	21.6234	+	+	PE3_PE1;PE7_PE1	7	3	0	1.93067	0.00459115	-0.354495	-4.39563	1.74881	0.00833701	-0.268501	-3.88064	P09086	PO2F2_HUMAN	POU2F2	POU domain
26.2876	26.3541	26.3444	26	26.092	26.047	25.9744	26.0529	26.0024	+	+	PE3_PE1;PE7_PE1	14	13	0	2.95469	0.000499579	-0.282337	-8.37861	3.29926	0.000849864	-0.318769	-10.2954	P09104	ENOG_HUMAN	ENO2	Gamma-enolase
22.0984	22.0569	22.1013	22.649	22.6994	22.6665	22.6012	22.7176	22.7384	+	+	PE3_PE1;PE7_PE1	14	14	0	5.04293	0	0.586159	28.4695	3.73649	0.000689864	0.600229	13.3238	P09110	THIK_HUMAN	ACAA1	3-ketoacyl-CoA thiolase
22.3647	22.3088	22.3437	22.965	22.9634	22.9329	22.9156	22.9858	23.039	+	+	PE3_PE1;PE7_PE1	5	5	0	5.23013	0	0.614669	31.7214	4.08271	0.000314741	0.641036	16.3122	P09132	SRP19_HUMAN	SRP19	Signal recognition particle 19 kDa protein
29.0308	29.0573	29.0894	30.2567	30.2651	30.1815	29.6056	29.6713	29.5697	+	+	PE3_PE1;PE7_PE1	12	0	0	5.50926	0	1.17525	37.2678	4.07589	0.000312871	0.556345	16.2476	P09211;cRAP-P09211	GSTP1_HUMAN;cRAP-GSTP1_HUMAN	GSTP1;cRAP-GSTP1	Glutathione S-transferase P
24.9093	24.9443	24.9637	24.7021	24.7466	24.6927	24.7933	24.8414	24.646	+	+	PE3_PE1;PE7_PE1	3	3	0	3.21391	0.000322932	-0.225331	-9.78597	1.37151	0.0188504	-0.178886	-2.93716	P09234	RU1C_HUMAN	SNRPC	U1 small nuclear ribonucleoprotein C
25.6796	25.7063	25.6755	23.9905	24.0681	23.9957	23.9522	24.1234	24.061	+	+	PE3_PE1;PE7_PE1	9	9	0	6.39687	0	-1.66902	-62.1683	5.25774	0.000318937	-1.64161	-32.2313	P09326	CD48_HUMAN	CD48	CD48 antigen
27.6795	27.6441	27.6333	28.2487	28.2742	28.1983	28.1943	28.2209	28.2184	+	+	PE3_PE1;PE7_PE1	8	8	0	4.6246	0	0.588085	22.3483	5.36282	0.000360902	0.558862	34.2473	P09382	LEG1_HUMAN	LGALS1	Galectin-1
23.587	23.5219	23.5603	23.297	23.3109	23.2566	23.3369	23.2841	23.2723	+	+	PE3_PE1;PE7_PE1	11	11	0	3.37172	0.000187364	-0.268204	-10.7474	3.15296	0.00117635	-0.258653	-9.43669	P09417	DHPR_HUMAN	QDPR	Dihydropteridine reductase
26.2434	26.2273	26.2278	26.256	26.2749	26.2772	26.252	26.2622	26.2342	+		PE3_PE1	10	6	0	1.88816	0.00535382	0.0365117	4.27125	0.787897	0.0834654	0.0166492	1.70723	P09429	HMGB1_HUMAN	HMGB1	High mobility group protein B1
20.6964	20.5015	20.7491	21.3443	21.4367	21.5249	21.214	21.3095	21.2671	+	+	PE3_PE1;PE7_PE1	11	11	0	2.99511	0.000415986	0.786294	8.585	2.80674	0.00160573	0.614518	7.66083	P09486	SPRC_HUMAN	SPARC	SPARC
26.092	26.115	26.0926	25.8104	25.8219	25.8237	25.7824	25.8175	25.8545	+	+	PE3_PE1;PE7_PE1	8	8	0	5.27556	0	-0.281196	-32.5646	3.65678	0.000736842	-0.281721	-12.7147	P09496	CLCA_HUMAN	CLTA	Clathrin light chain A
23.5435	23.5011	23.4444	23.887	23.9437	23.8352	23.9165	23.9479	23.9157	+	+	PE3_PE1;PE7_PE1	12	12	0	3.11641	0.000346047	0.392319	9.23282	3.82903	0.000358891	0.430347	14.0661	P09497	CLCB_HUMAN	CLTB	Clathrin light chain B
22.9035	22.9365	22.9831	22.8695	22.8764	22.8025	22.7803	22.8587	22.8168	+	+	PE3_PE1;PE7_PE1	22	22	0	1.30027	0.0211328	-0.0915648	-2.77474	1.71297	0.00907176	-0.122416	-3.7842	P09525	ANXA4_HUMAN	ANXA4	Annexin A4
25.1609	25.1682	25.1739	25.3112	25.3612	25.2942	25.3743	25.341	25.3215	+	+	PE3_PE1;PE7_PE1	26	26	0	2.78323	0.000795691	0.15449	7.552	3.4438	0.000875825	0.177932	11.2155	P09543	CN37_HUMAN	CNP	2'
24.7892	24.7822	24.83	25.4347	25.5025	25.5248	25.46	25.5459	25.5605	+	+	PE3_PE1;PE7_PE1	18	18	0	4.61453	0	0.68689	22.2182	4.50024	0.000137536	0.721694	20.7937	P09622	DLDH_HUMAN	DLD	Dihydrolipoyl dehydrogenase
28.7961	28.884	28.8564	28.4321	28.4388	28.386	28.5095	28.5455	28.5137	+	+	PE3_PE1;PE7_PE1	20	1	0	3.80243	9.11765e-05	-0.426544	-13.8487	3.46955	0.000840295	-0.322592	-11.3874	P09651	ROA1_HUMAN	HNRNPA1	Heterogeneous nuclear ribonucleoprotein A1
24.4307	24.3942	24.4147	24.0948	24.1097	24.0824	24.0777	24.1389	24.0979	+	+	PE3_PE1;PE7_PE1	14	14	0	4.753	0	-0.317541	-24.0737	3.91383	0.000380952	-0.308352	-14.7812	P09661	RU2A_HUMAN	SNRPA1	U2 small nuclear ribonucleoprotein A'
24.36	24.5735	24.4503	24.8373	24.9266	24.9462	24.8801	24.9759	24.853	+	+	PE3_PE1;PE7_PE1	7	7	0	2.48475	0.00143566	0.442074	6.28392	2.44155	0.00266974	0.441727	6.11654	P09668	CATH_HUMAN	CTSH	Pro-cathepsin H
25.9824	25.9652	25.9444	25.4101	25.4259	25.4737	25.4754	25.4809	25.385	+	+	PE3_PE1;PE7_PE1	5	5	0	4.74308	0	-0.527391	-23.9358	4.01512	0.000415486	-0.516843	-15.6818	P09669	COX6C_HUMAN	COX6C	Cytochrome c oxidase subunit 6C
27.328	27.3124	27.3192	26.9771	27.0169	26.9992	26.9992	27.0167	26.9969	+	+	PE3_PE1;PE7_PE1	69	69	0	4.88952	0	-0.322168	-26.0528	5.6738	0.000545455	-0.3156	-40.9785	P09874	PARP1_HUMAN	PARP1	Poly [ADP-ribose] polymerase 1
20.3809	20.3464	20.4407	20.0967	20.1648	20.0575	20.1744	20.2075	20.2655	+	+	PE3_PE1;PE7_PE1	40	40	0	2.60697	0.00116889	-0.282996	-6.77876	1.97548	0.00528652	-0.173515	-4.52956	P09884	DPOLA_HUMAN	POLA1	DNA polymerase alpha catalytic subunit
27.1658	27.1454	27.2353	25.1395	25.2816	24.9749	25.1449	25.172	25.1763	+	+	PE3_PE1;PE7_PE1	25	25	0	4.60644	0	-2.05018	-22.1143	6.59596	0.00223256	-2.01779	-69.7235	P09917	LOX5_HUMAN	ALOX5	Polyunsaturated fatty acid 5-lipoxygenase
30.0342	30.0309	30.0754	29.8508	29.8364	29.7848	29.9387	29.9111	29.8445	+	+	PE3_PE1;PE7_PE1	14	14	0	3.08367	0.000398174	-0.222867	-9.05366	2.04342	0.00475468	-0.148774	-4.73828	P09936	UCHL1_HUMAN	UCHL1	Ubiquitin carboxyl-terminal hydrolase isozyme L1
24.4622	24.5461	24.5421	24.347	24.3958	24.3286	24.2372	24.272	24.2892	+	+	PE3_PE1;PE7_PE1	31	31	0	2.0351	0.00356846	-0.159625	-4.71235	2.87974	0.00129402	-0.250655	-8.00774	P09960	LKHA4_HUMAN	LTA4H	Leukotriene A-4 hydrolase
26.7708	26.7761	26.7719	27.0697	26.904	26.8913	27.0191	26.831	26.8316	+		PE3_PE1	26	19	0	1.46917	0.0146403	0.182051	3.16718	0.900914	0.062326	0.12093	1.9313	P09972	ALDOC_HUMAN	ALDOC	Fructose-bisphosphate aldolase C
22.729	22.6989	22.7218	21.3018	21.1803	21.2358	21.6301	21.546	21.4236	+	+	PE3_PE1;PE7_PE1	47	3	0	5.66328	0	-1.47731	-40.7308	4.39123	0.00024647	-1.18337	-19.5188	P0C0L4	CO4A_HUMAN	C4A	Complement C4-A
28.8566	28.7375	28.828	28.3101	28.3493	28.261	28.3822	28.4441	28.4051	+	+	PE3_PE1;PE7_PE1	2	0	0	3.46621	0.000143768	-0.500526	-11.365	3.22883	0.000998964	-0.39684	-9.87328	P0C0S5;Q71UI9	H2AV_HUMAN;H2AZ_HUMAN	H2AZ1;H2AZ2	Histone H2A.Z
19.7291	19.5373	19.7644	18.4389	19.6758	19.6286	18.9075	19.2087	19.3277		+	PE7_PE1	1	0	0	0.449592	0.24145	-0.429131	-1.04468	1.67527	0.00985303	-0.528973	-3.68442	P0C0S8;Q16777;Q6FI13;Q96KK5;Q99878;Q9BTM1	H2A1H_HUMAN;H2A1J_HUMAN;H2A1_HUMAN;H2A2A_HUMAN;H2A2C_HUMAN;H2AJ_HUMAN	H2AC11;H2AC12;H2AC14;H2AC18;H2AC20;H2AJ	Histone H2A type 1
19.8826	19.3593	19.7427	19.6571	19.8658	19.8651	19.7711	19.9289	19.6289				4	4	0	0.322488	0.439231	0.13448	0.785847	0.255003	0.628954	0.114767	0.641857	P0C1Z6	TFPT_HUMAN	TFPT	TCF3 fusion partner
21.1821	21.1544	21.1273	20.9683	20.9317	20.87	20.9219	20.8262	20.992	+	+	PE3_PE1;PE7_PE1	9	9	0	2.67267	0.00097093	-0.231257	-7.05845	2.05296	0.00461861	-0.241256	-4.76816	P0C2W1	FBSP1_HUMAN	FBXO45	F-box/SPRY domain-containing protein 1
21.3161	21.673	21.5237	21.249	21.2944	21.4921	21.6635	21.6035	21.4649				4	4	0	0.552151	0.164421	-0.159088	-1.24695	0.242145	0.661881	0.0730387	0.613686	P0C7P0	CISD3_HUMAN	CISD3	CDGSH iron-sulfur domain-containing protein 3
18.1905	18.0542	17.8681	16.7896	16.6273	16.4952	16.6979	16.5729	16.7867	+	+	PE3_PE1;PE7_PE1	8	8	0	3.42265	0.000139876	-1.40024	-11.0762	3.5658	0.000757616	-1.35177	-12.0523	P0C7T5	ATX1L_HUMAN	ATXN1L	Ataxin-1-like
21.5084	21.8417	21.7079	21.4262	21.4541	21.3636	21.3062	21.421	21.443	+	+	PE3_PE1;PE7_PE1	12	12	0	1.26765	0.0228715	-0.271369	-2.70178	1.31129	0.0220786	-0.295923	-2.79957	P0CAP2	GRL1A_HUMAN	POLR2M	DNA-directed RNA polymerase II subunit GRINL1A
22.4871	22.2914	22.3353	20.2424	20.3728	20.2683	20.1782	20.648	20.3799	+	+	PE3_PE1;PE7_PE1	13	13	0	5.07942	0	-2.0768	-29.0762	3.72944	0.000686747	-1.96927	-13.2688	P0CG12	DERPC_HUMAN	DERPC	Decreased expression in renal and prostate cancer protein
21.0944	21.0708	20.9995	19.5519	19.5146	19.805	16.6989	19.729	19.8772	+	+	PE3_PE1;PE7_PE1	3	3	1	3.93633	0	-1.43105	-14.9768	1.03655	0.0431506	-2.28653	-2.20705	P0CG13	CTF8_HUMAN	CHTF8	Chromosome transmission fidelity protein 8 homolog
18.3359	18.3248	18.4702	19.1085	19.4906	19.1863	19.0779	19.1956	19.1648	+	+	PE3_PE1;PE7_PE1	6	3	0	2.66979	0.000969169	0.884897	7.04597	3.71319	0.000676056	0.769149	13.1429	P0CK96	S352B_HUMAN	SLC35E2B	Solute carrier family 35 member E2B
21.9123	22.1944	22.3602	22.0419	22.2306	21.9562	22.1393	17.2762	21.9442				1	0	1	0.198511	0.761516	-0.0793559	-0.515908	0.461029	0.235035	-1.70242	-1.06743	P0CW00;A0A494C1R9;A6NKD2;P0CV98;P0CV99;P0CW01;Q01534	TSPY1_HUMAN;TSPY2_HUMAN;TSPY3_HUMAN;TSPY4_HUMAN;TSPY8_HUMAN;TSPY9_HUMAN;TSPYA_HUMAN	TSPY1;TSPY10;TSPY2;TSPY3;TSPY4;TSPY8;TSPY9	Testis-specific Y-encoded protein 9
17.5307	17.567	18.0776	17.8686	17.9491	18.5951	18.5835	17.6402	16.7347				1	0	1	0.642306	0.121333	0.412472	1.4228	0.0439041	0.958063	-0.0723203	-0.128643	P0DI81;P0DI82	TPC2A_HUMAN;TPC2B_HUMAN	TRAPPC2;TRAPPC2B	Trafficking protein particle complex subunit 2
21.5495	21.6993	21.7973	21.9823	22.0789	21.9068	22.1425	21.9853	22.1841	+	+	PE3_PE1;PE7_PE1	2	2	0	1.60706	0.010363	0.307296	3.50812	1.96014	0.00541333	0.421888	4.48339	P0DJ07	PT100_HUMAN	PET100	Protein PET100 homolog
19.0458	17.9598	18.5564	19.8771	19.7883	19.8864	19.8992	19.7943	19.9384	+	+	PE3_PE1;PE7_PE1	2	2	1	1.86843	0.00550775	1.32991	4.21437	1.89126	0.00622464	1.35659	4.28023	P0DJ93	SIM13_HUMAN	SMIM13	Small integral membrane protein 13
25.9693	25.9686	25.9887	25.6976	25.7847	25.7186	25.7543	25.85	25.7636	+	+	PE3_PE1;PE7_PE1	13	0	0	3.06216	0.000390681	-0.241878	-8.93771	2.40301	0.00288645	-0.186206	-5.97039	P0DMV8;P0DMV9	HS71A_HUMAN;HS71B_HUMAN	HSPA1A;HSPA1B	Heat shock 70 kDa protein 1A
20.7249	20.8733	20.8673	20.2762	20.3992	20.2538	20.5702	20.6593	20.9619	+		PE3_PE1	1	0	0	2.82017	0.000777035	-0.512128	-7.72362	0.288282	0.533282	-0.091397	-0.713609	P0DOY2;P0DOY3	IGLC2_HUMAN;IGLC3_HUMAN	IGLC2;IGLC3	Immunoglobulin lambda constant 2
28.014	27.9643	28.0691	27.7047	27.7944	27.7676	27.668	27.7987	27.7893	+	+	PE3_PE1;PE7_PE1	11	0	0	2.52959	0.00135079	-0.260196	-6.46174	2.15278	0.0040797	-0.263821	-5.08943	P0DP23;P0DP24;P0DP25	CALM1_HUMAN;CALM2_HUMAN;CALM3_HUMAN	CALM1;CALM2;CALM3	Calmodulin-1
22.0985	22.0238	22.205	22.4893	22.5045	22.4597	22.4341	22.4965	22.4987	+	+	PE3_PE1;PE7_PE1	7	6	0	2.64227	0.000953945	0.375375	6.92781	2.53483	0.00232449	0.367334	6.48277	P0DPB6	RPAC2_HUMAN	POLR1D	DNA-directed RNA polymerases I and III subunit RPAC2
21.8906	22.1387	22.027	23.1188	23.1613	23.0763	22.9783	23.1282	23.0941	+	+	PE3_PE1;PE7_PE1	9	2	0	3.88208	0	1.10005	14.5094	3.60711	0.000710075	1.04811	12.3489	P0DPD7	EFMT4_HUMAN	EEF1AKMT4	EEF1A lysine methyltransferase 4
25.5128	25.499	25.4661	25.8331	25.7879	25.7954	25.8771	25.8211	25.8661	+	+	PE3_PE1;PE7_PE1	15	15	0	4.03862	0	0.312826	15.8983	4.09559	0.000319838	0.362153	16.4352	P0DPI2	GAL3A_HUMAN	GATD3	Glutamine amidotransferase-like class 1 domain-containing protein 3
18.908	19.5684	18.8243	19.6423	19.4905	19.1331	19.8892	19.2157	18.9949				5	0	0	0.503166	0.19582	0.321739	1.15079	0.303259	0.489796	0.2664	0.745413	P0DTE7;P0DTE8;P0DUB6;cRAP-P04745;P04746;P19961	AMY1A_HUMAN;AMY1B_HUMAN;AMY1C_HUMAN;AMY2B_HUMAN;AMYP_HUMAN;cRAP-AMY1_HUMAN	AMY1A;AMY1B;AMY1C;AMY2A;AMY2B;cRAP-AMY1A	Pancreatic alpha-amylase
23.8789	23.7629	23.8607	23.6553	23.6193	23.7763	23.597	23.6664	23.7457	+	+	PE3_PE1;PE7_PE1	14	14	0	1.18731	0.027611	-0.150489	-2.52562	1.37008	0.0188937	-0.164477	-2.93385	P0DTL6	ZTRF1_HUMAN	ZFTRAF1	Zinc finger TRAF-type-containing protein 1
19.3601	19.0312	19.3367	19.8457	19.6144	19.612	20.1247	19.4493	19.8481	+	+	PE3_PE1;PE7_PE1	6	6	0	1.56936	0.0113433	0.448055	3.41292	1.19119	0.0292762	0.564691	2.53402	P10074	TZAP_HUMAN	ZBTB48	Telomere zinc finger-associated protein
22.3313	22.1892	22.2808	23.7718	23.7961	23.8505	23.9386	23.8283	23.9083	+	+	PE3_PE1;PE7_PE1	5	5	0	5.26183	0	1.53903	32.3075	5.17072	0.000267409	1.62461	30.6513	P10109	ADX_HUMAN	FDX1	Adrenodoxin
17.0441	17.114	17.4646	16.7436	16.1731	16.2941	16.6652	16.8711	16.4975	+	+	PE3_PE1;PE7_PE1	3	3	0	1.68374	0.00877791	-0.803985	-3.70668	1.45434	0.0154326	-0.529657	-3.13167	P10114	RAP2A_HUMAN	RAP2A	Ras-related protein Rap-2a
23.3666	23.9474	23.7284	23.4214	23.2897	23.1751	23.4529	23.6688	23.4651	+		PE3_PE1	2	2	0	0.983708	0.045663	-0.385413	-2.09855	0.34317	0.396407	-0.151877	-0.828888	P10124	SRGN_HUMAN	SRGN	Serglycin
24.0869	24.1869	24.214	28.0602	28.0144	27.9619	28.2519	28.3018	28.2466	+	+	PE3_PE1;PE7_PE1	4	0	0	6.83983	0	3.84956	80.2387	7.16266	0	4.10418	96.6332	P10147	CCL3_HUMAN	CCL3	C-C motif chemokine 3
24.659	24.6859	24.699	24.5418	24.5889	24.5388	24.5469	24.4956	24.535	+	+	PE3_PE1;PE7_PE1	25	25	0	2.46891	0.00142358	-0.12476	-6.22208	2.87489	0.00128814	-0.155451	-7.98423	P10155	RO60_HUMAN	RO60	RNA-binding protein RO60
18.6493	19.5113	19.3113	18.526	16.8068	17.9424	18.2193	18.2904	18.9023	+		PE3_PE1	1	1	0	1.15816	0.0296156	-1.3989	-2.46286	0.948067	0.054205	-0.68663	-2.02617	P10176	COX8A_HUMAN	COX8A	Cytochrome c oxidase subunit 8A
20.2152	20.3815	20.2095	20.3895	19.9742	20.294	20.5343	20.5693	20.3224		+	PE7_PE1	13	13	0	0.132314	0.860265	-0.0494932	-0.359537	1.01483	0.045573	0.206614	2.16227	P10244	MYBB_HUMAN	MYBL2	Myb-related protein B
23.9098	23.7971	23.8302	24.0343	24.0223	24.0349	23.9584	24.0468	24.0297	+	+	PE3_PE1;PE7_PE1	24	24	0	2.26977	0.00210103	0.184796	5.4872	1.74066	0.00843185	0.165942	3.85857	P10253	LYAG_HUMAN	GAA	Lysosomal alpha-glucosidase
20.3526	20.4017	20.4387	20.4094	20.2604	20.3907	20.5101	20.2624	20.4249				10	8	0	0.344325	0.390142	-0.044138	-0.831277	0.00634311	0.993971	0.00148519	0.019334	P10301	RRAS_HUMAN	RRAS	Ras-related protein R-Ras
25.8078	25.8139	25.7588	25.2244	25.1971	25.1925	25.1583	25.1149	25.1494	+	+	PE3_PE1;PE7_PE1	3	3	0	5.09257	0	-0.588847	-29.2981	5.12045	0.000256684	-0.652617	-29.7739	P10321	HLAC_HUMAN	HLA-C	HLA class I histocompatibility antigen
21.8545	22.0474	22.0672	21.758	21.8659	21.871	21.7667	21.7059	21.6889	+	+	PE3_PE1;PE7_PE1	14	13	0	0.958747	0.0485659	-0.158081	-2.0478	1.6991	0.00956463	-0.269186	-3.74729	P10398	ARAF_HUMAN	ARAF	Serine/threonine-protein kinase A-Raf
24.1363	25.2335	23.8364	23.2755	22.9738	24.2236	24.432	24.0753	24.8912				1	1	0	0.735908	0.0916048	-0.911095	-1.60533	0.0450729	0.957494	0.0640965	0.131916	P10412	H14_HUMAN	H1-4	Histone H1.4
24.5057	24.5914	24.5644	25.7561	25.8216	25.7939	25.798	25.8274	25.8329	+	+	PE3_PE1;PE7_PE1	22	22	0	5.59235	0	1.23668	39.0977	5.87365	0.00070073	1.26557	45.9841	P10515	ODP2_HUMAN	DLAT	Dihydrolipoyllysine-residue acetyltransferase component of pyruvate dehydrogenase complex
19.9936	19.1386	20.6701	21.169	21.0544	21.1111	20.9076	21.0905	21.0631	+	+	PE3_PE1;PE7_PE1	27	22	1	1.24411	0.0242437	1.17739	2.64966	1.14346	0.0332293	1.0863	2.43145	P10586	PTPRF_HUMAN	PTPRF	Receptor-type tyrosine-protein phosphatase F
30.1166	30.0626	30.1184	30.5801	30.4495	30.4767	29.8014	29.882	29.8145	+	+	PE3_PE1;PE7_PE1	10	0	0	3.11014	0.000344764	0.402891	9.19826	3.0004	0.00130631	-0.26655	-8.61236	P10599;cRAP-P10599	THIO_HUMAN;cRAP-THIO_HUMAN	TXN;cRAP-TXN	Thioredoxin
27.0181	26.734	26.9578	26.1138	26.0887	26.0397	26.1682	26.1017	26.1036	+	+	PE3_PE1;PE7_PE1	7	7	0	3.11608	0.000345725	-0.822558	-9.231	3.02436	0.00132602	-0.778784	-8.7373	P10606	COX5B_HUMAN	COX5B	Cytochrome c oxidase subunit 5B
24.3788	24.4022	24.3747	24.8997	24.9093	24.8492	24.8021	24.8723	24.8996	+	+	PE3_PE1;PE7_PE1	11	11	0	4.7787	0	0.500858	24.4346	4.00846	0.000412758	0.472817	15.6211	P10619	PPGB_HUMAN	CTSA	Lysosomal protective protein
24.5078	24.3952	24.3466	22.8078	22.797	22.6836	22.5614	22.6549	22.3477	+	+	PE3_PE1;PE7_PE1	4	4	0	4.92721	0	-1.65368	-26.627	4.29481	0.000226415	-1.89519	-18.4556	P10620	MGST1_HUMAN	MGST1	Microsomal glutathione S-transferase 1
25.4161	25.4048	25.4235	26.0002	26.1085	26.0922	25.9918	26.0404	26.0681	+	+	PE3_PE1;PE7_PE1	26	23	0	4.35275	0	0.652193	19.0875	4.94857	0.000215247	0.618666	26.958	P10644	KAP0_HUMAN	PRKAR1A	cAMP-dependent protein kinase type I-alpha regulatory subunit
22.4003	22.6093	22.5633	22.3207	22.2661	22.334	22.2844	22.3987	22.3376	+	+	PE3_PE1;PE7_PE1	12	12	0	1.50626	0.0133684	-0.217353	-3.25697	1.20972	0.0281461	-0.184071	-2.57428	P10746	HEM4_HUMAN	UROS	Uroporphyrinogen-III synthase
22.088	21.8364	21.8431	22.5032	22.5175	22.5201	22.6578	22.6514	22.531	+	+	PE3_PE1;PE7_PE1	6	6	0	2.68875	0.000977323	0.591121	7.12838	2.76572	0.00160717	0.690902	7.47183	P10747	CD28_HUMAN	CD28	T-cell-specific surface glycoprotein CD28
23.9148	24.0358	23.9963	24.3849	24.3385	24.3405	24.3912	24.4065	24.3984	+	+	PE3_PE1;PE7_PE1	11	11	0	3.18554	0.000317121	0.372312	9.62195	3.50138	0.00085768	0.416387	11.6033	P10768	ESTD_HUMAN	ESD	S-formylglutathione hydrolase
29.4183	29.4804	29.4171	29.5193	29.5769	29.5658	29.5988	29.6226	29.6437	+	+	PE3_PE1;PE7_PE1	47	47	0	1.8689	0.00551189	0.115372	4.21573	2.75819	0.00160155	0.183104	7.43761	P10809	CH60_HUMAN	HSPD1	60 kDa heat shock protein
23.9097	23.9323	23.942	24.8543	24.9059	24.879	24.9367	24.996	24.9671	+	+	PE3_PE1;PE7_PE1	14	14	0	6.1451	0	0.951748	53.7727	6.11723	0.000979592	1.0386	52.9161	P10909	CLUS_HUMAN	CLU	Clusterin
18.9693	18.7611	18.7955	18.5522	18.432	18.8559	18.136	18.7914	18.9383				4	4	0	0.740307	0.0905758	-0.228579	-1.61393	0.359872	0.36513	-0.220058	-0.863336	P10914	IRF1_HUMAN	IRF1	Interferon regulatory factor 1
29.8783	29.796	29.8266	30.5352	30.5596	30.5362	30.4933	30.5895	30.5655	+	+	PE3_PE1;PE7_PE1	49	47	0	5.01792	0	0.710042	28.0609	4.34965	0.00023733	0.715814	19.0532	P11021	BIP_HUMAN	HSPA5	Endoplasmic reticulum chaperone BiP
21.8347	22.0866	22.1141	17.5882	18.2896	16.9827	16.2952	17.6385	17.1877	+	+	PE3_PE1;PE7_PE1	4	4	1	3.45946	0.000142939	-4.39162	-11.3198	3.59851	0.000705242	-4.97133	-12.2866	P11049	CD37_HUMAN	CD37	Leukocyte antigen CD37
23.3154	23.3243	23.4331	23.6958	23.7665	23.7564	23.7777	23.7748	23.7475	+	+	PE3_PE1;PE7_PE1	14	14	0	3.02113	0.000380288	0.381966	8.72033	3.32889	0.000864388	0.409093	10.4781	P11117	PPAL_HUMAN	ACP2	Lysosomal acid phosphatase
29.4523	29.5356	29.5667	29.5858	29.6292	29.6133	29.5935	29.6458	29.6257	+	+	PE3_PE1;PE7_PE1	42	31	0	1.17781	0.0281525	0.0912514	2.5051	1.29712	0.0230963	0.103481	2.76764	P11142	HSP7C_HUMAN	HSPA8	Heat shock cognate 71 kDa protein
19.8355	19.7466	19.5848	20.8962	20.9261	20.6587	20.4618	20.6796	20.539	+	+	PE3_PE1;PE7_PE1	5	5	0	3.22737	0.000325349	1.1047	9.86469	3.00145	0.00130807	0.837823	8.61782	P11166	GTR1_HUMAN	SLC2A1	Solute carrier family 2
22.6365	22.663	22.6161	22.6572	22.6294	22.6386	22.6283	22.6148	22.667				32	27	0	0.0722259	0.931079	0.00326602	0.206088	0.0294132	0.97126	-0.00181071	-0.0874508	P11171	EPB41_HUMAN	EPB41	Protein 4.1
24.9384	24.8986	24.9171	24.9659	24.9938	24.9151	24.9509	24.9876	24.969		+	PE7_PE1	29	29	0	0.713457	0.0981011	0.0402063	1.56147	1.51181	0.0134335	0.0511367	3.2705	P11172	UMPS_HUMAN	UMPS	Uridine 5'-monophosphate synthase
24.7677	24.8543	24.7908	25.1725	25.1536	25.2192	25.1251	25.1588	25.2232	+	+	PE3_PE1;PE7_PE1	17	17	0	3.50689	0.000147707	0.377516	11.641	3.15018	0.0011746	0.364745	9.42104	P11177	ODPB_HUMAN	PDHB	Pyruvate dehydrogenase E1 component subunit beta
22.0754	21.9674	21.8398	22.313	22.3386	22.2345	22.5223	22.3942	22.4743	+	+	PE3_PE1;PE7_PE1	15	15	0	1.95285	0.00419938	0.334501	4.46157	2.53208	0.0023205	0.502743	6.47172	P11182	ODB2_HUMAN	DBT	Lipoamide acyltransferase component of branched-chain alpha-keto acid dehydrogenase complex
24.4576	24.407	24.4186	25.3138	25.3382	25.3221	25.2772	25.333	25.289	+	+	PE3_PE1;PE7_PE1	50	39	0	6.12527	0	0.896991	53.1619	5.55107	0.000466019	0.871979	38.1778	P11216	PYGB_HUMAN	PYGB	Glycogen phosphorylase
23.52	23.3188	23.3642	23.4488	23.5298	23.5435	23.5337	23.5113	23.4897				10	6	0	0.718282	0.0966448	0.106379	1.57089	0.82313	0.0764349	0.110584	1.77665	P11233	RALA_HUMAN	RALA	Ras-related protein Ral-A
22.4261	22.416	22.1231	21.5354	21.3666	21.3839	21.4504	21.3391	21.4438	+	+	PE3_PE1;PE7_PE1	4	4	0	2.8595	0.0006528	-0.893084	-7.91018	3.00083	0.00130689	-0.910574	-8.61463	P11234	RALB_HUMAN	RALB	Ras-related protein Ral-B
22.7034	22.5848	22.5368	22.924	22.8602	22.9646	22.9337	22.9036	22.9272	+	+	PE3_PE1;PE7_PE1	27	25	0	2.21536	0.00240787	0.307951	5.29922	2.46825	0.00247321	0.31322	6.21951	P11274	BCR_HUMAN	BCR	Breakpoint cluster region protein
25.5962	25.611	25.5773	25.1459	25.2146	25.1313	25.2921	25.2297	25.3076	+	+	PE3_PE1;PE7_PE1	7	7	0	4.01608	0	-0.430915	-15.6906	3.61127	0.000712517	-0.318405	-12.3791	P11279	LAMP1_HUMAN	LAMP1	Lysosome-associated membrane glycoprotein 1
24.161	24.1939	24.1593	23.7271	23.6929	23.7172	23.8009	23.7935	23.8227	+	+	PE3_PE1;PE7_PE1	18	18	0	5.1478	0	-0.458984	-30.2482	4.86052	0.00019917	-0.365692	-25.6193	P11310	ACADM_HUMAN	ACADM	Medium-chain specific acyl-CoA dehydrogenase
25.9642	26.0061	26.0224	25.8349	25.8987	25.9016	25.8076	25.8352	25.8372	+	+	PE3_PE1;PE7_PE1	44	39	0	1.89145	0.00536462	-0.119127	-4.2808	3.00389	0.00130926	-0.170871	-8.63045	P11387	TOP1_HUMAN	TOP1	DNA topoisomerase 1
23.7695	23.7657	23.7682	23.5986	23.5867	23.5988	23.7584	23.7844	23.8034	+		PE3_PE1	55	55	0	5.70534	0	-0.173114	-41.731	0.472684	0.224615	0.0142651	1.09057	P11388	TOP2A_HUMAN	TOP2A	DNA topoisomerase 2-alpha
24.6286	24.6668	24.6452	24.4943	24.5324	24.5301	24.4468	24.4975	24.4923	+	+	PE3_PE1;PE7_PE1	37	37	0	2.81873	0.000775815	-0.12793	-7.71687	2.99802	0.00130279	-0.167996	-8.60005	P11413	G6PD_HUMAN	G6PD	Glucose-6-phosphate 1-dehydrogenase
22.0789	22.0881	22.025	22.1912	22.2684	22.2958	22.2886	22.2839	22.2412	+	+	PE3_PE1;PE7_PE1	9	9	0	2.14967	0.0026461	0.187845	5.07916	2.95023	0.00135243	0.207243	8.35608	P11441	UBL4A_HUMAN	UBL4A	Ubiquitin-like protein 4A
21.871	21.8972	21.7499	21.2201	21.2202	21.1962	21.1344	21.1632	21.1559	+	+	PE3_PE1;PE7_PE1	33	33	0	3.77232	8.94661e-05	-0.627197	-13.6065	3.92663	0.000384279	-0.688222	-14.8923	P11532	DMD_HUMAN	DMD	Dystrophin
25.6843	25.7022	25.69	25.6705	25.7072	25.6896	25.7295	25.7326	25.7225		+	PE7_PE1	50	49	0	0.0927054	0.907371	-0.00307274	-0.259883	2.39555	0.00291329	0.0359726	5.94244	P11586	C1TC_HUMAN	MTHFD1	C-1-tetrahydrofolate synthase
23.1199	23.0877	23.1284	23.6764	23.6941	23.6858	23.7354	23.7126	23.7371	+	+	PE3_PE1;PE7_PE1	95	95	0	5.7489	0	0.573447	42.7926	5.71495	0.000581818	0.616326	41.9629	P11717	MPRI_HUMAN	IGF2R	Cation-independent mannose-6-phosphate receptor
25.4824	25.5403	25.5188	25.4758	25.5388	25.5366	25.4288	25.4884	25.5041				17	17	0	0.0418328	0.960409	0.00327555	0.122824	0.633072	0.130116	-0.0400238	-1.40482	P11766	ADHX_HUMAN	ADH5	Alcohol dehydrogenase class-3
23.3497	23.2275	23.432	24.7124	24.7513	24.6697	24.6919	24.7055	24.7037	+	+	PE3_PE1;PE7_PE1	14	14	0	4.55849	0	1.37475	21.5081	4.66622	0.000161616	1.36393	22.8938	P11802	CDK4_HUMAN	CDK4	Cyclin-dependent kinase 4
23.6658	23.6302	23.6881	23.4187	23.4807	23.4003	23.5239	23.5186	23.4091	+	+	PE3_PE1;PE7_PE1	7	6	0	2.81684	0.00077551	-0.228144	-7.708	1.90641	0.00606448	-0.177504	-4.32436	P11908	PRPS2_HUMAN	PRPS2	Ribose-phosphate pyrophosphokinase 2
26.1374	26.0507	26.0752	25.7813	25.7969	25.7805	25.8646	25.8917	25.8161	+	+	PE3_PE1;PE7_PE1	28	8	0	3.47674	0.000144606	-0.301547	-11.4358	2.60625	0.00201283	-0.230339	-6.77573	P11940	PABP1_HUMAN	PABPC1	Polyadenylate-binding protein 1
26.9165	26.8743	26.9435	26.7694	26.8232	26.7537	26.8712	26.8563	26.8336	+	+	PE3_PE1;PE7_PE1	16	16	0	1.94686	0.00433977	-0.129355	-4.44368	1.18587	0.0297434	-0.0577437	-2.52251	P12004	PCNA_HUMAN	PCNA	Proliferating cell nuclear antigen
24.7486	24.7043	24.732	25.5871	25.6145	25.5503	25.2266	25.1752	25.142	+	+	PE3_PE1;PE7_PE1	25	0	0	5.53512	0	0.855639	37.8279	4.08186	0.000314428	0.45294	16.3042	P12081;cRAP-P12081	HARS1_HUMAN;cRAP-SYHC_HUMAN	HARS1;cRAP-HARS	Histidine--tRNA ligase
21.5184	21.4942	21.3985	20.9224	20.8105	20.8074	21.1242	21.0777	20.793	+	+	PE3_PE1;PE7_PE1	4	4	0	3.53689	0.000151589	-0.623615	-11.8488	1.89809	0.00617833	-0.472094	-4.3001	P12109	CO6A1_HUMAN	COL6A1	Collagen alpha-1(VI) chain
25.5854	25.5714	25.4532	25.512	25.5779	25.5768	25.6678	25.6226	25.6282		+	PE7_PE1	4	4	0	0.148976	0.839143	0.0189044	0.399971	1.09218	0.0372264	0.102882	2.32293	P12235	ADT1_HUMAN	SLC25A4	ADP/ATP translocase 1
26.5714	26.6441	26.623	26.7445	26.8196	26.6846	26.6656	26.7668	26.7259	+	+	PE3_PE1;PE7_PE1	9	5	0	1.42589	0.0161168	0.136729	3.06413	1.36537	0.0191727	0.106586	2.92298	P12236	ADT3_HUMAN	SLC25A6	ADP/ATP translocase 3
23.6401	23.5953	23.5874	23.4332	23.4574	23.3976	23.5331	23.5675	23.6277	+		PE3_PE1	15	15	0	2.76224	0.000921905	-0.178197	-7.456	0.417819	0.279915	-0.0315291	-0.981074	P12259	FA5_HUMAN	F5	Coagulation factor V
26.6871	26.5775	26.6141	26.9767	27.0018	26.9299	27.0421	27.0373	27.0378	+	+	PE3_PE1;PE7_PE1	32	30	0	3.05799	0.000389112	0.343255	8.9154	3.66821	0.000654702	0.412823	12.8004	P12268	IMDH2_HUMAN	IMPDH2	Inosine-5'-monophosphate dehydrogenase 2
24.0254	24.0308	24.0278	24.1385	24.1323	24.1453	24.1262	24.1454	24.1438	+	+	PE3_PE1;PE7_PE1	120	120	0	4.96808	0	0.110756	27.2638	4.19098	0.000341991	0.110489	17.374	P12270	TPR_HUMAN	TPR	Nucleoprotein TPR
24.9356	24.923	24.8691	21.4043	21.4173	21.7047	21.186	21.5071	21.5076	+	+	PE3_PE1;PE7_PE1	15	14	0	5.34843	0	-3.40049	-33.9639	5.25514	0.000317881	-3.50902	-32.1829	P12277	KCRB_HUMAN	CKB	Creatine kinase B-type
20.5022	21.0718	20.345	20.5822	20.3709	20.6675	20.4009	20.0025	19.9439				1	1	0	0.156703	0.828404	-0.0994708	-0.418457	0.92988	0.0572128	-0.523897	-1.98947	P12429	ANXA3_HUMAN	ANXA3	Annexin A3
21.0507	21.0446	21.0437	17.9309	17.7224	18.3547	17.816	15.9982	17.9566	+	+	PE3_PE1;PE7_PE1	2	1	1	4.08792	0	-3.04362	-16.3618	2.41309	0.00274805	-3.78934	-6.00832	P12532	KCRU_HUMAN	CKMT1A	Creatine kinase U-type
23.1027	22.9481	23.043	22.6973	22.8829	22.7949	22.673	22.8424	22.7524	+	+	PE3_PE1;PE7_PE1	17	17	0	1.57314	0.0112244	-0.239579	-3.42239	1.843	0.00687992	-0.275372	-4.14186	P12694	ODBA_HUMAN	BCKDHA	2-oxoisovalerate dehydrogenase subunit alpha
17.4522	18.1284	18.9357	18.6751	18.2088	18.0274	18.515	18.5251	18.2422				7	7	1	0.100557	0.898379	0.131688	0.28007	0.227904	0.695441	0.255396	0.582162	P12757	SKIL_HUMAN	SKIL	Ski-like protein
21.2506	21.1297	21.1992	21.6799	21.6045	21.7382	21.4457	21.5472	21.5507	+	+	PE3_PE1;PE7_PE1	26	22	0	3.11314	0.000345083	0.481021	9.21477	2.54978	0.00219292	0.321372	6.5432	P12814	ACTN1_HUMAN	ACTN1	Alpha-actinin-1
21.6201	21.6696	21.5974	21.3041	21.1971	21.2013	21.3432	21.3072	21.1581	+	+	PE3_PE1;PE7_PE1	13	8	0	3.18804	0.000317584	-0.394869	-9.63625	2.39478	0.00291142	-0.359531	-5.93954	P12931	SRC_HUMAN	SRC	Proto-oncogene tyrosine-protein kinase Src
23.4968	23.569	23.537	24.4141	24.4172	24.4487	24.3582	24.4594	24.3757	+	+	PE3_PE1;PE7_PE1	19	19	0	5.53273	0	0.892375	37.7758	4.67357	0.000163543	0.863471	22.9914	P12955	PEPD_HUMAN	PEPD	Xaa-Pro dipeptidase
26.4173	26.338	26.3783	26.0607	26.1064	26.0721	26.0565	26.1091	26.0854	+	+	PE3_PE1;PE7_PE1	44	44	0	3.43663	0.00014115	-0.29815	-11.1681	3.36512	0.000885375	-0.294252	-10.7055	P12956	XRCC6_HUMAN	XRCC6	X-ray repair cross-complementing protein 6
25.6352	25.5888	25.6689	25.3601	25.376	25.3892	25.421	25.3977	25.4269	+	+	PE3_PE1;PE7_PE1	39	39	0	3.30981	0.000180483	-0.255838	-10.3601	3.01258	0.00131758	-0.215759	-8.67567	P13010	XRCC5_HUMAN	XRCC5	X-ray repair cross-complementing protein 5
21.4219	21.3096	21.1567	21.0114	20.9538	20.7818	20.968	20.526	20.8812	+	+	PE3_PE1;PE7_PE1	12	12	0	1.67527	0.00895075	-0.380442	-3.68443	1.50056	0.0137566	-0.504361	-3.24308	P13051	UNG_HUMAN	UNG	Uracil-DNA glycosylase
26.3889	26.4238	26.5114	25.8346	25.9945	25.9145	25.8046	25.8141	25.8591	+	+	PE3_PE1;PE7_PE1	8	8	0	3.06613	0.000391382	-0.526866	-8.95904	3.97643	0.000401094	-0.615422	-15.3317	P13073	COX41_HUMAN	COX4I1	Cytochrome c oxidase subunit 4 isoform 1
21.1331	21.1306	21.3662	21.7715	22.2451	22.1405	21.4947	21.7233	21.8596	+	+	PE3_PE1;PE7_PE1	6	6	0	2.17181	0.00252255	0.842402	5.15251	1.66388	0.0102035	0.482555	3.65462	P13284	GILT_HUMAN	IFI30	Gamma-interferon-inducible lysosomal thiol reductase
26.157	26.2902	26.171	25.5091	25.4707	25.433	25.5649	25.6183	25.5491	+	+	PE3_PE1;PE7_PE1	7	7	0	3.98819	0	-0.735115	-15.4373	3.7373	0.000691433	-0.628632	-13.3301	P13473	LAMP2_HUMAN	LAMP2	Lysosome-associated membrane glycoprotein 2
25.9552	25.9386	25.9424	25.9239	25.9374	25.9017	25.9526	25.9869	25.9676	+	+	PE3_PE1;PE7_PE1	22	22	0	0.989549	0.0451149	-0.0243766	-2.11047	0.994703	0.0476734	0.0236225	2.12101	P13489	RINI_HUMAN	RNH1	Ribonuclease inhibitor
20.142	20.2964	19.9724	19.874	19.7555	20.1021	20.2653	20.1059	20.014				16	9	0	0.752942	0.086964	-0.226432	-1.63866	0.0239771	0.976095	-0.00852521	-0.0716938	P13497	BMP1_HUMAN	BMP1	Bone morphogenetic protein 1
19.9151	19.8917	19.9781	18.5709	18.2202	18.533	18.3295	18.2022	18.3497	+	+	PE3_PE1;PE7_PE1	4	4	0	3.69899	8.45839e-05	-1.48696	-13.0338	5.18492	0.000279883	-1.6345	-30.9038	P13498	CY24A_HUMAN	CYBA	Cytochrome b-245 light chain
21.4168	21.2282	21.5639	20.4121	20.7124	20.5668	20.521	20.5296	20.5924	+	+	PE3_PE1;PE7_PE1	10	10	0	2.52539	0.00134672	-0.83919	-6.44488	2.99387	0.0013411	-0.855345	-8.57862	P13591	NCAM1_HUMAN	NCAM1	Neural cell adhesion molecule 1
21.8633	21.8771	21.9353	22.1407	22.0903	22.0574	21.8844	22.0041	21.9456	+		PE3_PE1	7	7	0	2.47102	0.00142681	0.204242	6.23028	0.573643	0.158147	0.0528374	1.28896	P13598	ICAM2_HUMAN	ICAM2	Intercellular adhesion molecule 2
22.7407	22.6823	22.6352	23.0235	23.0924	23.0884	23.0519	23.0388	23.054	+	+	PE3_PE1;PE7_PE1	28	28	0	3.26718	0.000333163	0.382008	10.1011	3.5189	0.000789306	0.36215	11.7238	P13612	ITA4_HUMAN	ITGA4	Integrin alpha-4
28.8881	28.9337	28.9519	28.4783	28.5774	28.563	28.4241	28.4784	28.52	+	+	PE3_PE1;PE7_PE1	59	58	0	3.35001	0.000185145	-0.384975	-10.6101	3.74401	0.000695122	-0.450404	-13.3826	P13639	EF2_HUMAN	EEF2	Elongation factor 2
19.9466	19.6692	19.8015	21.1923	21.2015	21.1961	18.3641	17.7106	18.9493	+	+	PE3_PE1;PE7_PE1	14	0	0	4.18896	0	1.39084	17.3536	1.79031	0.00769284	-1.46447	-3.99433	P13645;cRAP-P13645	K1C10_HUMAN;cRAP-K1C10_HUMAN	KRT10;cRAP-KRT10	Keratin
27.1009	27.0337	27.1158	27.9327	28.0154	27.9765	27.9549	27.9944	27.9822	+	+	PE3_PE1;PE7_PE1	48	47	0	4.86158	0	0.89139	25.635	5.25109	0.000314754	0.893667	32.1078	P13667	PDIA4_HUMAN	PDIA4	Protein disulfide-isomerase A4
23.0069	22.8896	22.9256	22.7519	22.7457	22.8072	22.6094	22.5392	22.5145	+	+	PE3_PE1;PE7_PE1	22	22	0	1.9081	0.00506133	-0.17243	-4.3293	3.00033	0.00130572	-0.386363	-8.61199	P13674	P4HA1_HUMAN	P4HA1	Prolyl 4-hydroxylase subunit alpha-1
25.7961	26.0198	26.1019	25.5164	25.6618	25.5965	25.5363	25.6595	25.5729	+	+	PE3_PE1;PE7_PE1	6	3	0	1.71441	0.00807439	-0.381019	-3.78804	1.75307	0.0082516	-0.382983	-3.89221	P13693	TCTP_HUMAN	TPT1	Translationally-controlled tumor protein
22.9854	23.0125	22.9807	22.3157	22.1674	22.1919	22.1244	22.0086	22.0661	+	+	PE3_PE1;PE7_PE1	14	14	0	4.08703	0	-0.767866	-16.3534	4.92372	0.000211454	-0.926484	-26.5733	P13716	HEM2_HUMAN	ALAD	Delta-aminolevulinic acid dehydratase
27.4055	27.3429	27.4198	26.9941	26.9447	26.9418	26.8585	26.9724	26.9376	+	+	PE3_PE1;PE7_PE1	16	13	0	3.91152	0	-0.429242	-14.7613	3.46167	0.000832117	-0.466599	-11.3346	P13747	HLAE_HUMAN	HLA-E	HLA class I histocompatibility antigen
25.5195	25.5687	25.5988	25.8473	25.8777	25.8419	25.6311	25.6727	25.6219	+	+	PE3_PE1;PE7_PE1	43	35	0	3.47554	0.00014427	0.293328	11.4277	1.33407	0.0207389	0.0795676	2.85125	P13796	PLSL_HUMAN	LCP1	Plastin-2
20.5419	20.3317	20.4939	22.1026	21.9737	21.9528	21.963	22.0389	22.0076	+	+	PE3_PE1;PE7_PE1	21	21	0	4.40472	0	1.55386	19.6723	4.67345	0.000163265	1.54735	22.9899	P13797	PLST_HUMAN	PLS3	Plastin-3
24.7626	24.6806	24.7249	24.1333	24.1254	24.1067	24.1218	24.05	24.0929	+	+	PE3_PE1;PE7_PE1	23	23	0	4.75225	0	-0.600894	-24.0632	4.44106	0.000255659	-0.63446	-20.0917	P13798	ACPH_HUMAN	APEH	Acylamino-acid-releasing enzyme
25.469	25.4346	25.5101	25.8159	25.778	25.7933	25.8418	25.8583	25.9018	+	+	PE3_PE1;PE7_PE1	15	15	0	3.73058	8.6171e-05	0.324495	13.2776	3.82611	0.000358306	0.396079	14.042	P13804	ETFA_HUMAN	ETFA	Electron transfer flavoprotein subunit alpha
23.768	23.6377	23.6697	24.4882	24.5243	24.4827	24.5089	24.4755	24.5077	+	+	PE3_PE1;PE7_PE1	31	30	0	4.39168	0	0.806625	19.5239	4.41509	0.000249675	0.805567	19.7911	P13807	GYS1_HUMAN	GYS1	Glycogen [starch] synthase
23.7029	23.7638	23.7817	23.9633	23.9682	24.0098	24.0271	24.0588	24.0781	+	+	PE3_PE1;PE7_PE1	21	19	0	2.92614	0.000491518	0.230965	8.23554	3.38991	0.000902706	0.30519	10.8637	P13861	KAP2_HUMAN	PRKAR2A	cAMP-dependent protein kinase type II-alpha regulatory subunit
18.349	17.4737	17.6879	17.6473	17.1512	17.6316	18.1995	16.3043	16.9947				4	4	1	0.509354	0.191313	-0.360144	-1.16298	0.474259	0.223267	-0.670691	-1.09369	P13929	ENOB_HUMAN	ENO3	Beta-enolase
23.0287	22.9954	23.0126	22.8419	22.9135	22.8533	22.8671	22.9285	22.8416	+	+	PE3_PE1;PE7_PE1	20	20	0	2.3848	0.00166532	-0.142672	-5.90235	2.07517	0.00441506	-0.133199	-4.83826	P13984	T2FB_HUMAN	GTF2F2	General transcription factor IIF subunit 2
26.0647	26.0998	26.029	20.9633	21.1746	20.9231	21.0838	20.6868	21.2077	+	+	PE3_PE1;PE7_PE1	4	4	0	6.40808	0	-5.04414	-62.5709	5.24584	0.00031068	-5.07175	-32.0106	P13987	CD59_HUMAN	CD59	CD59 glycoprotein
19.751	19.2133	19.1727	20.2795	20.4322	20.3401	20.3159	20.3424	20.0561	+	+	PE3_PE1;PE7_PE1	11	11	0	2.14738	0.00264314	0.971602	5.07164	1.84211	0.00690964	0.859125	4.13934	P13994	YJU2B_HUMAN	YJU2B	Probable splicing factor YJU2B
24.5031	24.3698	24.4614	24.4273	24.419	24.4244	24.5346	24.5338	24.4989				14	14	0	0.207584	0.744348	-0.0211671	-0.536543	0.880587	0.0655289	0.0777009	1.89068	P13995	MTDC_HUMAN	MTHFD2	Bifunctional methylenetetrahydrofolate dehydrogenase/cyclohydrolase
29.5609	29.5212	29.5183	29.654	29.7483	29.5427	29.5109	29.4519	29.561				2	2	0	0.87704	0.0611889	0.114874	1.8836	0.301785	0.493993	-0.0255343	-0.742294	P14174	MIF_HUMAN	MIF	Macrophage migration inhibitory factor
27.4643	27.6159	27.6313	28.0318	28.078	28.0549	27.9076	27.9862	27.9924	+	+	PE3_PE1;PE7_PE1	27	27	0	3.03989	0.000385159	0.484365	8.81914	2.5494	0.00219216	0.39157	6.54166	P14314	GLU2B_HUMAN	PRKCSH	Glucosidase 2 subunit beta
21.3671	21.2317	21.3791	21.183	20.9271	21.24	21.2364	21.3007	21.2077				10	10	0	0.911269	0.0555357	-0.209255	-1.95205	0.641578	0.126419	-0.0776933	-1.42139	P14316	IRF2_HUMAN	IRF2	Interferon regulatory factor 2
26.8601	26.8029	26.8322	26.4456	26.4861	26.4342	26.4162	26.4246	26.4556	+	+	PE3_PE1;PE7_PE1	24	24	0	4.1018	0	-0.376437	-16.4948	4.39819	0.000247104	-0.399607	-19.5979	P14317	HCLS1_HUMAN	HCLS1	Hematopoietic lineage cell-specific protein
26.2759	26.247	26.3005	26.6733	26.6816	26.6556	26.6137	26.5946	26.5982	+	+	PE3_PE1;PE7_PE1	13	13	0	4.671	0	0.395711	22.9572	4.41968	0.000250653	0.327677	19.8439	P14324	FPPS_HUMAN	FDPS	Farnesyl pyrophosphate synthase
23.7529	23.7577	23.8921	21.1506	21.2479	21.2639	21.2558	21.1613	21.3097	+	+	PE3_PE1;PE7_PE1	15	14	0	5.82391	0	-2.5801	-44.6841	5.66007	0.000536313	-2.55862	-40.6553	P14373	TRI27_HUMAN	TRIM27	Zinc finger protein RFP
26.1811	26.0641	26.0501	25.1952	25.2151	25.0923	25.2444	25.2241	25.0991	+	+	PE3_PE1;PE7_PE1	2	2	0	4.105	0	-0.930901	-16.5255	3.91295	0.000379965	-0.909215	-14.7737	P14406	CX7A2_HUMAN	COX7A2	Cytochrome c oxidase subunit 7A2
24.7271	24.6873	24.6403	24.2664	24.304	24.2668	24.1941	24.2606	24.2943	+	+	PE3_PE1;PE7_PE1	21	21	0	3.87995	0	-0.405899	-14.4914	3.45011	0.000824593	-0.435272	-11.2574	P14550	AK1A1_HUMAN	AKR1A1	Aldo-keto reductase family 1 member A1
23.6207	23.6002	23.5235	20.8479	21.0189	20.7464	21.0572	20.671	20.6362	+	+	PE3_PE1;PE7_PE1	20	1	0	5.24263	0	-2.71035	-31.9512	4.45249	0.000258412	-2.79332	-20.2255	P14598	NCF1_HUMAN	NCF1	Neutrophil cytosol factor 1
28.7996	28.8107	28.8095	28.6334	28.6606	28.6525	28.4832	28.5484	28.556	+	+	PE3_PE1;PE7_PE1	43	42	0	4.24445	0	-0.157801	-17.923	3.54088	0.000804672	-0.277404	-11.8767	P14618	KPYM_HUMAN	PKM	Pyruvate kinase PKM
23.0628	23.1143	23.0286	22.7347	22.6281	22.6768	22.6376	22.5547	22.5358	+	+	PE3_PE1;PE7_PE1	7	7	0	3.21814	0.000323734	-0.388716	-9.81065	3.60276	0.000706203	-0.49255	-12.3173	P14621	ACYP2_HUMAN	ACYP2	Acylphosphatase-2
31.4963	31.4998	31.5166	30.8961	30.9791	30.9293	30.9619	30.9829	30.962	+	+	PE3_PE1;PE7_PE1	71	57	0	4.66189	0	-0.56939	-22.8363	6.24936	0.0012	-0.535291	-57.1025	P14625	ENPL_HUMAN	HSP90B1	Endoplasmin
22.1885	22.1799	22.1943	22.1323	22.1483	22.1763	22.3519	22.347	22.3312	+	+	PE3_PE1;PE7_PE1	9	9	0	1.22572	0.0252281	-0.0353095	-2.60925	4.49169	0.000135977	0.155778	20.6908	P14635	CCNB1_HUMAN	CCNB1	G2/mitotic-specific cyclin-B1
26.2943	26.4774	26.5149	26.4796	26.5672	26.6301	26.4138	26.4387	26.4299				10	8	0	0.736829	0.0913817	0.130054	1.60713	0.00672309	0.993595	-0.00140381	-0.0204835	P14649	MYL6B_HUMAN	MYL6B	Myosin light chain 6B
26.3727	26.475	26.5281	26.4235	26.4613	26.4416	26.2196	26.3276	26.2287		+	PE7_PE1	9	1	0	0.128812	0.863889	-0.0164553	-0.350935	1.60178	0.0113564	-0.199981	-3.4947	P14678	RSMB_HUMAN	SNRPB	Small nuclear ribonucleoprotein-associated proteins B and B'
23.6131	23.4571	23.5055	23.8193	23.8712	23.828	23.7934	23.8424	23.8055	+	+	PE3_PE1;PE7_PE1	47	47	0	2.52329	0.00138636	0.314232	6.43649	2.40031	0.0028818	0.288483	5.96027	P14735	IDE_HUMAN	IDE	Insulin-degrading enzyme
26.2057	26.1899	26.1017	25.5405	25.6384	25.5193	25.5842	25.4635	25.5294	+	+	PE3_PE1;PE7_PE1	7	7	0	3.59582	0.000157161	-0.599716	-12.2671	3.75303	0.000702619	-0.640014	-13.4536	P14854	CX6B1_HUMAN	COX6B1	Cytochrome c oxidase subunit 6B1
21.9334	21.8258	21.9046	21.8099	22.0103	21.7658	21.8923	21.8712	21.9718				4	3	0	0.115024	0.880051	-0.0259151	-0.316687	0.20735	0.73858	0.0238063	0.536012	P14859	PO2F1_HUMAN	POU2F1	POU domain
26.8349	26.8531	26.9208	26.5643	26.5587	26.5696	26.6833	26.6726	26.6526	+	+	PE3_PE1;PE7_PE1	24	23	0	3.50203	0.000147356	-0.30539	-11.6077	2.71454	0.0017392	-0.200103	-7.24187	P14866	HNRPL_HUMAN	HNRNPL	Heterogeneous nuclear ribonucleoprotein L
25.9559	25.9615	25.9813	25.7445	25.7258	25.7113	25.7925	25.7745	25.7967	+	+	PE3_PE1;PE7_PE1	36	36	0	4.37897	0	-0.239	-19.3804	4.18566	0.000341253	-0.178348	-17.3203	P14868	SYDC_HUMAN	DARS1	Aspartate--tRNA ligase
18.1937	17.3863	17.999	17.1815	17.4868	17.1037	16.251	16.684	17.4248	+	+	PE3_PE1;PE7_PE1	3	3	1	1.04847	0.0392489	-0.602343	-2.23173	1.2001	0.0285492	-1.07309	-2.55334	P14921	ETS1_HUMAN	ETS1	Protein C-ets-1
25.5257	25.5259	25.5346	25.2157	25.2545	25.1969	25.3693	25.4086	25.3509	+	+	PE3_PE1;PE7_PE1	8	8	0	4.23059	0	-0.306365	-17.779	3.0427	0.00124651	-0.152467	-8.83399	P14927	QCR7_HUMAN	UQCRB	Cytochrome b-c1 complex subunit 7
20.8304	20.0778	20.5018	21.0902	21.0418	21.0208	21.1318	21.1551	21.0345	+	+	PE3_PE1;PE7_PE1	12	12	0	1.24646	0.0241423	0.580912	2.65485	1.34812	0.020123	0.637087	2.88335	P15056	BRAF_HUMAN	BRAF	Serine/threonine-protein kinase B-raf
16.4255	18.378	16.4249	17.2064	16.8082	16.2638	15.1843	16.9393	16.8955				1	0	1	0.169423	0.810507	-0.316641	-0.448549	0.351485	0.380112	-0.736414	-0.846071	P15086	CBPB1_HUMAN	CPB1	Carboxypeptidase B
26.7929	26.7979	26.7965	27.2621	27.2523	27.2657	27.2254	27.2271	27.2301	+	+	PE3_PE1;PE7_PE1	23	22	0	7.36266	0	0.464218	108.428	8.52449	0	0.431752	211.662	P15121	ALDR_HUMAN	AKR1B1	Aldo-keto reductase family 1 member B1
27.3278	27.3934	27.321	27.6562	27.6844	27.6501	27.6343	27.6211	27.6212	+	+	PE3_PE1;PE7_PE1	9	4	0	3.62169	7.97941e-05	0.316188	12.4552	3.53464	0.000801551	0.278152	11.8331	P15153	RAC2_HUMAN	RAC2	Ras-related C3 botulinum toxin substrate 2
17.8944	19.6435	18.3026	19.5133	18.7779	19.3326	19.2307	19.3358	19.4784				1	1	0	0.446121	0.245023	0.594405	1.03775	0.619361	0.13581	0.734784	1.37811	P15169	CBPN_HUMAN	CPN1	Carboxypeptidase N catalytic chain
24.2738	24.366	24.3365	23.607	23.7181	23.6422	23.5806	23.7497	23.5292	+	+	PE3_PE1;PE7_PE1	12	12	0	4.01962	0	-0.669698	-15.7231	3.21794	0.00099228	-0.705615	-9.80948	P15170	ERF3A_HUMAN	GSPT1	Eukaryotic peptide chain release factor GTP-binding subunit ERF3A
20.6246	20.5813	20.4754	20.8219	20.7294	20.6919	20.9739	20.9434	20.8198	+	+	PE3_PE1;PE7_PE1	8	8	0	1.47715	0.0143195	0.187281	3.18637	2.25663	0.00334098	0.351924	5.44131	P15289	ARSA_HUMAN	ARSA	Arylsulfatase A
21.2033	21.4975	21.1782	21.491	21.5212	21.4907	21.4368	21.4732	21.6341				7	7	0	0.94459	0.0506156	0.207968	2.01915	0.866066	0.0681593	0.221721	1.86175	P15291	B4GT1_HUMAN	B4GALT1	Beta-1
29.1009	29.0243	29.0381	28.4922	28.5319	28.4914	28.3726	28.3976	28.391	+	+	PE3_PE1;PE7_PE1	58	42	0	4.45637	0	-0.549281	-20.2711	4.95092	0.000216216	-0.66739	-26.9946	P15311	EZRI_HUMAN	EZR	Ezrin
17.6087	17.4487	17.0487	16.9179	17.1654	17.357	17.4793	16.9498	17.1241				4	4	0	0.45689	0.23469	-0.221903	-1.05921	0.333159	0.417036	-0.184295	-0.808108	P15336	ATF2_HUMAN	ATF2	Cyclic AMP-dependent transcription factor ATF-2
22.2833	22.1394	22.2767	22.8582	22.9842	22.8743	22.7888	22.8054	22.8581	+	+	PE3_PE1;PE7_PE1	12	12	0	3.40445	0.000138393	0.672458	10.9576	3.46878	0.000838749	0.584351	11.3822	P15374	UCHL3_HUMAN	UCHL3	Ubiquitin carboxyl-terminal hydrolase isozyme L3
25.5341	25.5243	25.5498	24.9776	25.0199	24.9413	25.0299	25.0702	25.0715	+	+	PE3_PE1;PE7_PE1	44	43	0	4.69647	0	-0.556496	-23.2984	5.1787	0.000275072	-0.478865	-30.793	P15498	VAV_HUMAN	VAV1	Proto-oncogene vav
25.0248	24.9481	24.9719	24.0973	24.1058	24.1783	24.0187	24.0868	24.1172	+	+	PE3_PE1;PE7_PE1	12	12	0	4.8138	0	-0.8545	-24.936	4.78924	0.000183908	-0.907401	-24.584	P15529	MCP_HUMAN	CD46	Membrane cofactor protein
29.9599	29.9822	29.9521	30.2043	30.257	30.2805	30.1716	30.2351	30.2466	+	+	PE3_PE1;PE7_PE1	12	6	0	3.50573	0.000147619	0.282506	11.6331	3.27107	0.000901438	0.253023	10.1245	P15531	NDKA_HUMAN	NME1	Nucleoside diphosphate kinase A
22.6196	22.304	22.5129	21.8677	21.8606	21.8497	21.364	21.5548	21.259	+	+	PE3_PE1;PE7_PE1	8	0	0	2.58166	0.00115193	-0.619526	-6.67362	2.99134	0.00133751	-1.08625	-8.56556	P15559;cRAP-P15559	NQO1_HUMAN;cRAP-NQO1_HUMAN	NQO1;cRAP-NQO1	NAD(P)H dehydrogenase [quinone] 1
24.8828	24.693	24.7049	25.1989	25.2024	25.1688	25.1333	25.235	25.1384	+	+	PE3_PE1;PE7_PE1	16	16	0	2.63532	0.00102914	0.429799	6.89821	2.37331	0.00309657	0.408639	5.85976	P15586	GNS_HUMAN	GNS	N-acetylglucosamine-6-sulfatase
21.065	20.8095	21.1907	20.8282	20.9133	20.818	21.0464	20.8708	20.9434				12	11	0	0.65686	0.115401	-0.168547	-1.45115	0.215158	0.722467	-0.0682036	-0.553638	P15735	PHKG2_HUMAN	PHKG2	Phosphorylase b kinase gamma catalytic chain
19.9173	19.9455	19.7228	19.2893	19.5752	18.9095	19.5158	19.4524	19.2888	+	+	PE3_PE1;PE7_PE1	13	11	0	1.37436	0.0178174	-0.603827	-2.94372	1.98217	0.005276	-0.442818	-4.54981	P15822	ZEP1_HUMAN	HIVEP1	Zinc finger protein 40
19.5382	19.6192	20.0495	19.9996	20.1795	20.0087	20.0826	20.1629	19.9474				10	9	0	0.902006	0.0570565	0.326974	1.93348	0.898147	0.0626473	0.328675	1.92576	P15848	ARSB_HUMAN	ARSB	Arylsulfatase B
27.4157	27.3788	27.3851	27.3712	27.4261	27.4156	27.336	27.3867	27.3596				18	18	0	0.212054	0.735593	0.0111148	0.546646	0.807827	0.0795754	-0.0324154	-1.74646	P15880	RS2_HUMAN	RPS2	Small ribosomal subunit protein uS5
22.998	22.9431	23.0072	23.155	23.1195	23.1239	23.2929	23.2528	23.317	+	+	PE3_PE1;PE7_PE1	16	16	0	2.55123	0.00127995	0.150031	6.54907	3.42958	0.000930564	0.304773	11.1217	P15907	SIAT1_HUMAN	ST6GAL1	Beta-galactoside alpha-2
20.7617	20.5814	20.5916	20.6082	20.4873	20.4611	20.5859	20.5803	20.6159				12	11	0	0.786092	0.0786384	-0.12602	-1.70368	0.355572	0.372267	-0.0508556	-0.854493	P15923	TFE2_HUMAN	TCF3	Transcription factor E2-alpha
25.0778	25.0181	25.1605	24.3737	24.3981	24.3377	24.3419	24.395	24.3994	+	+	PE3_PE1;PE7_PE1	9	9	0	4.04456	0	-0.715616	-15.9534	4.00859	0.000413146	-0.706699	-15.6222	P15927	RFA2_HUMAN	RPA2	Replication protein A 32 kDa subunit
25.059	25.1264	24.8778	24.0996	24.2028	24.1902	24.2871	24.3509	24.3683	+	+	PE3_PE1;PE7_PE1	2	2	0	3.34425	0.000184253	-0.856918	-10.5739	3.02939	0.0012775	-0.685647	-8.76373	P15954	COX7C_HUMAN	COX7C	Cytochrome c oxidase subunit 7C
19.5206	19.2708	19.2886	19.9933	19.6455	19.983	19.8195	19.8691	20.0107	+	+	PE3_PE1;PE7_PE1	6	6	0	1.67293	0.009043	0.513933	3.67828	2.26345	0.00335414	0.539758	5.4651	P16035	TIMP2_HUMAN	TIMP2	Metalloproteinase inhibitor 2
26.6947	26.7079	26.7246	26.5155	26.5063	26.5282	26.5516	26.4266	26.3808	+	+	PE3_PE1;PE7_PE1	10	10	0	4.24952	0	-0.192434	-17.9759	2.10894	0.00426961	-0.256105	-4.94636	P16070	CD44_HUMAN	CD44	CD44 antigen
22.3018	22.1734	22.333	23.2614	23.1351	23.2273	22.9067	22.8136	22.7501	+	+	PE3_PE1;PE7_PE1	11	0	0	3.96247	0	0.938535	15.2073	2.93975	0.0013431	0.554104	8.30343	P16083;cRAP-P16083	NQO2_HUMAN;cRAP-NQO2_HUMAN	NQO2;cRAP-NQO2	Ribosyldihydronicotinamide dehydrogenase [quinone]
32.6135	32.556	32.567	32.4099	32.382	32.2731	32.3925	32.5368	32.458	+	+	PE3_PE1;PE7_PE1	9	4	0	2.10723	0.00296402	-0.223839	-4.94084	1.20781	0.0282678	-0.116388	-2.57012	P16104	H2AX_HUMAN	H2AX	Histone H2AX
16.1202	16.2475	15.8756	15.5553	17.7847	15.4375	15.0723	15.7585	15.1962		+	PE7_PE1	5	5	1	0.0815798	0.921078	0.178063	0.23087	1.44466	0.0159887	-0.73879	-3.10861	P16144	ITB4_HUMAN	ITGB4	Integrin beta-4
25.6118	25.568	25.6107	25.7377	25.7275	25.7417	25.7696	25.8108	25.7633	+	+	PE3_PE1;PE7_PE1	18	16	0	3.11601	0.000345564	0.138793	9.23063	3.05308	0.00115385	0.18441	8.88921	P16152	CBR1_HUMAN	CBR1	Carbonyl reductase [NADPH] 1
22.8805	22.881	22.8102	22.3677	22.443	22.37	22.4067	22.4563	22.4079	+	+	PE3_PE1;PE7_PE1	13	13	0	3.77038	8.92729e-05	-0.463732	-13.5911	3.95535	0.000394973	-0.433624	-15.1442	P16219	ACADS_HUMAN	ACADS	Short-chain specific acyl-CoA dehydrogenase
22.4126	22.4434	22.4264	21.8001	21.8432	21.8672	21.7283	21.6086	21.4862	+	+	PE3_PE1;PE7_PE1	3	3	0	4.97632	0	-0.590656	-27.394	3.50626	0.000782828	-0.819773	-11.6367	P16220	CREB1_HUMAN	CREB1	Cyclic AMP-responsive element-binding protein 1
19.5348	19.4537	19.4401	20.3868	20.3327	20.2773	20.4051	20.3928	20.3211	+	+	PE3_PE1;PE7_PE1	9	9	0	4.41378	0	0.856019	19.7761	4.65169	0.000158416	0.89679	22.7019	P16260	GDC_HUMAN	SLC25A16	Solute carrier family 25 member 16
23.6128	23.5338	23.5853	24.3614	24.4446	24.4145	24.3167	24.3561	24.3507	+	+	PE3_PE1;PE7_PE1	17	16	0	4.79843	0	0.829507	24.7152	5.08279	0.000244898	0.763861	29.133	P16278	BGAL_HUMAN	GLB1	Beta-galactosidase
22.2211	22.0146	21.8188	24.7403	24.6617	24.6739	24.7517	24.8094	24.7742	+	+	PE3_PE1;PE7_PE1	23	23	0	4.63842	0	2.6738	22.528	4.71282	0.000168421	2.76029	23.5201	P16284	PECA1_HUMAN	PECAM1	Platelet endothelial cell adhesion molecule
24.7334	24.6333	24.7305	24.7093	24.6178	24.6981	24.6513	24.6409	24.646				16	10	0	0.212717	0.734303	-0.0239697	-0.54814	0.73474	0.0966124	-0.0529683	-1.60304	P16298	PP2BB_HUMAN	PPP3CB	Serine/threonine-protein phosphatase 2B catalytic subunit beta isoform
22.331	22.4957	22.3105	22.2121	22.2223	22.1336	22.1605	22.246	22.2287	+	+	PE3_PE1;PE7_PE1	17	15	0	1.3642	0.0179785	-0.189741	-2.92028	1.22519	0.0272213	-0.167349	-2.60807	P16333	NCK1_HUMAN	NCK1	SH2/SH3 adapter protein NCK1
18.9367	18.5834	18.6702	18.8468	19.0431	18.8825	18.9282	18.8384	19.1003				12	12	0	0.726506	0.0940822	0.193996	1.58695	0.793906	0.0822609	0.225501	1.71905	P16383	GCFC2_HUMAN	GCFC2	Intron Large complex component GCFC2
29.7364	29.6736	29.6511	29.1179	29.106	29.0719	29.1199	29.1301	29.0889	+	+	PE3_PE1;PE7_PE1	13	8	0	4.45759	0	-0.588453	-20.2855	4.45318	0.000259109	-0.574078	-20.2336	P16401	H15_HUMAN	H1-5	Histone H1.5
22.613	22.5137	22.6321	20.9167	20.8915	21.0825	22.1906	21.951	22.4322	+	+	PE3_PE1;PE7_PE1	1	1	0	4.68163	0	-1.62272	-23.099	1.28911	0.0234863	-0.395043	-2.74968	P16402	H13_HUMAN	H1-3	Histone H1.3
30.8883	30.8607	30.8588	30.2465	30.2539	30.2565	30.4327	30.4383	30.4429	+	+	PE3_PE1;PE7_PE1	8	1	0	6.38344	0	-0.616985	-61.6889	5.76557	0.000623377	-0.431325	-43.2059	P16403	H12_HUMAN	H1-2	Histone H1.2
23.3044	23.1531	23.1582	24.5408	24.5312	24.5508	24.5502	24.6244	24.5075	+	+	PE3_PE1;PE7_PE1	38	38	0	4.93595	0	1.33566	26.7619	4.63708	0.000155592	1.35542	22.5105	P16435	NCPR_HUMAN	POR	NADPH--cytochrome P450 reductase
21.852	21.9912	22.0234	23.1896	23.156	23.0922	23.1639	23.1495	23.225	+	+	PE3_PE1;PE7_PE1	10	10	0	4.42366	0	1.19042	19.8899	4.54149	0.00014307	1.22394	21.2971	P16455	MGMT_HUMAN	MGMT	Methylated-DNA--protein-cysteine methyltransferase
22.2762	22.3671	22.3408	22.3412	22.4691	22.4303	22.3755	22.3905	22.2908				21	19	0	0.853976	0.0649189	0.0854823	1.83773	0.230837	0.689122	0.0242176	0.588684	P16591	FER_HUMAN	FER	Tyrosine-protein kinase Fer
24.862	24.849	24.8648	25.5074	25.5989	25.5619	25.4704	25.5562	25.5212	+	+	PE3_PE1;PE7_PE1	52	33	0	4.87309	0	0.697462	25.8064	4.87891	0.000202105	0.65731	25.8934	P16615	AT2A2_HUMAN	ATP2A2	Sarcoplasmic/endoplasmic reticulum calcium ATPase 2
24.6624	24.6693	24.6707	23.5124	23.5252	23.5266	23.3412	23.4678	23.4101	+	+	PE3_PE1;PE7_PE1	71	70	0	8.59097	0	-1.1461	-219.921	5.36882	0.000365019	-1.26112	-34.3662	P16885	PLCG2_HUMAN	PLCG2	1-phosphatidylinositol 4
23.138	23.1526	23.1414	23.5072	23.4762	23.5207	23.4425	23.5111	23.5194	+	+	PE3_PE1;PE7_PE1	16	16	0	4.8679	0	0.357371	25.729	3.82424	0.000357143	0.346996	14.0267	P16930	FAAA_HUMAN	FAH	Fumarylacetoacetase
27.6018	27.5762	27.5497	27.1878	27.1755	27.1778	27.285	27.333	27.3146	+	+	PE3_PE1;PE7_PE1	18	13	0	4.85245	0	-0.395543	-25.5	3.68185	0.000662309	-0.265025	-12.9033	P16949	STMN1_HUMAN	STMN1	Stathmin
21.8449	21.7181	21.7438	22.4172	22.4335	22.4621	22.5298	22.4339	22.4956	+	+	PE3_PE1;PE7_PE1	10	10	0	4.0878	0	0.668667	16.3607	3.94038	0.000389036	0.717492	15.0123	P16989	YBOX3_HUMAN	YBX3	Y-box-binding protein 3
18.3321	18.5271	18.7105	18.0944	18.1875	17.9095	18.4417	18.4135	18.3746	+		PE3_PE1	6	1	0	1.55114	0.0119947	-0.459436	-3.36744	0.437543	0.257897	-0.113274	-1.02062	P17010	ZFX_HUMAN	ZFX	Zinc finger X-chromosomal protein
21.3139	21.1718	21.264	21.1104	21.3284	21.2274	21.4319	21.2743	21.3845				10	8	0	0.136243	0.855307	-0.0278714	-0.369145	0.843457	0.0722593	0.113628	1.81687	P17026	ZNF22_HUMAN	ZNF22	Zinc finger protein 22
23.5404	23.5115	23.4208	22.7235	22.7422	22.7682	22.7724	22.8014	22.7964	+	+	PE3_PE1;PE7_PE1	17	17	0	4.38838	0	-0.746297	-19.4866	4.33323	0.000233577	-0.700883	-18.8722	P17028	ZNF24_HUMAN	ZNF24	Zinc finger protein 24
21.2533	21.2092	21.3721	21.5566	21.3901	21.3201	21.4908	21.529	21.4067		+	PE7_PE1	13	11	0	0.777967	0.0806516	0.144056	1.68772	1.5058	0.0136392	0.197294	3.25584	P17029	ZKSC1_HUMAN	ZKSCAN1	Zinc finger protein with KRAB and SCAN domains 1
17.2001	16.7741	16.8474	16.7593	16.0049	17.0619	18.804	17.3152	16.3716				7	6	2	0.414299	0.279843	-0.331835	-0.973991	0.31619	0.456091	0.556419	0.77265	P17036	ZNF3_HUMAN	ZNF3	Zinc finger protein 3
21.233	21.1682	21.0646	22.2422	22.199	22.3789	22.2699	22.315	22.3272	+	+	PE3_PE1;PE7_PE1	7	7	0	3.97208	0	1.11809	15.2928	4.60307	0.000151659	1.14879	22.0711	P17050	NAGAB_HUMAN	NAGA	Alpha-N-acetylgalactosaminidase
25.5797	25.4808	25.474	25.2711	25.2916	25.3233	25.3162	25.3533	25.4021	+	+	PE3_PE1;PE7_PE1	4	0	0	2.35244	0.00180294	-0.216176	-5.78304	1.66306	0.0102214	-0.154345	-3.65248	P17066	HSP76_HUMAN	HSPA6	Heat shock 70 kDa protein 6
25.2623	25.267	25.1473	25.8274	25.7921	25.7739	25.8334	25.8587	25.8288	+	+	PE3_PE1;PE7_PE1	8	8	0	3.76751	8.90165e-05	0.572287	13.5683	3.97074	0.000398551	0.614763	15.2808	P17096	HMGA1_HUMAN	HMGA1	High mobility group protein HMG-I/HMG-Y
18.6361	18.4738	18.9689	19.038	18.7168	17.421	18.5563	18.7383	18.5775				7	7	1	0.228797	0.69874	-0.300995	-0.58415	0.165712	0.808171	-0.068903	-0.439814	P17098	ZNF8_HUMAN	ZNF8	Zinc finger protein 8
22.1818	22.2734	22.1492	22.1079	21.9431	22.0133	22.0433	22.0547	22.1076	+	+	PE3_PE1;PE7_PE1	7	7	0	1.38755	0.0173954	-0.180021	-2.97431	1.46386	0.0151185	-0.132913	-3.15444	P17152	TMM11_HUMAN	TMEM11	Transmembrane protein 11
24.8915	24.8534	24.8906	25.2514	25.2173	25.2561	25.2536	25.3055	25.2553	+	+	PE3_PE1;PE7_PE1	22	22	0	4.49366	0	0.363087	20.7145	4.30718	0.000228571	0.392959	18.5887	P17174	AATC_HUMAN	GOT1	Aspartate aminotransferase
20.2078	20.3745	20.4668	19.8679	19.558	19.6626	19.4161	19.4379	19.4326	+	+	PE3_PE1;PE7_PE1	10	10	0	2.27827	0.00207113	-0.653537	-5.51701	3.57321	0.000762667	-0.920835	-12.105	P17181	INAR1_HUMAN	IFNAR1	Interferon alpha/beta receptor 1
18.4476	18.3428	17.7405	17.8972	18.0041	17.9367	17.8684	18.3261	17.8637				4	4	1	0.446198	0.244958	-0.230974	-1.03791	0.230027	0.691059	-0.157556	-0.586885	P17275	JUNB_HUMAN	JUNB	Transcription factor JunB
20.5416	20.2763	20.4112	21.4488	21.3264	21.3658	21.2964	21.3713	21.2652	+	+	PE3_PE1;PE7_PE1	11	11	0	3.48106	0.000145199	0.970626	11.465	3.39331	0.000904789	0.901288	10.8856	P17405	ASM_HUMAN	SMPD1	Sphingomyelin phosphodiesterase
23.954	23.907	23.8906	23.8229	23.8001	23.8149	23.8709	23.8818	23.8527	+	+	PE3_PE1;PE7_PE1	34	34	0	2.18579	0.00250741	-0.104582	-5.19926	1.10316	0.0364354	-0.0487798	-2.34603	P17480	UBF1_HUMAN	UBTF	Nucleolar transcription factor 1
16.2572	16.6504	17.0243	16.8949	16.8644	16.4202	16.4376	16.4862	17.0694				5	4	1	0.110906	0.885408	0.082524	0.306339	0.022707	0.977381	0.0204245	0.0679872	P17483	HXB4_HUMAN	HOXB4	Homeobox protein Hox-B4
13.1489	13.319	17.3624	12.0553	11.735	17.6699	12.3753	11.6798	12.092				3	3	2	0.12178	0.871506	-0.790015	-0.333545	0.855221	0.0698492	-2.56107	-1.8402	P17535	JUND_HUMAN	JUND	Transcription factor JunD
19.9213	20.0581	19.8448	19.5631	19.6407	19.8523	20.0661	19.7051	19.804	+		PE3_PE1	8	5	0	1.12991	0.031944	-0.256067	-2.40261	0.26671	0.596185	-0.083058	-0.667281	P17544	ATF7_HUMAN	ATF7	Cyclic AMP-dependent transcription factor ATF-7
23.0267	23.1227	23.013	21.495	21.4531	21.5797	21.4603	21.718	21.7067	+	+	PE3_PE1;PE7_PE1	7	7	0	5.15803	0	-1.54485	-30.4274	4.01588	0.000415879	-1.42579	-15.6888	P17568	NDUB7_HUMAN	NDUFB7	NADH dehydrogenase [ubiquinone] 1 beta subcomplex subunit 7
24.6224	24.5666	24.6495	25.496	25.4671	25.4194	25.5807	25.5729	25.6097	+	+	PE3_PE1;PE7_PE1	16	6	0	4.86246	0	0.848016	25.6481	5.46438	0.000413793	0.974927	36.3149	P17612	KAPCA_HUMAN	PRKACA	cAMP-dependent protein kinase catalytic subunit alpha
24.6606	24.6192	24.6584	24.7047	24.6506	24.6774	24.6322	24.6854	24.6706				28	28	0	0.696174	0.103386	0.0314808	1.52775	0.329274	0.425566	0.0166276	0.800019	P17655	CAN2_HUMAN	CAPN2	Calpain-2 catalytic subunit
18.8002	19.5331	19.4193	19.3763	19.6001	19.347	20.1081	19.9858	19.8691		+	PE7_PE1	5	5	0	0.323747	0.43627	0.19028	0.788479	1.43962	0.0162004	0.736775	3.09662	P17676	CEBPB_HUMAN	CEBPB	CCAAT/enhancer-binding protein beta
21.3704	21.2388	21.0732	20.3315	20.5113	20.4068	20.4723	20.2356	20.3314	+	+	PE3_PE1;PE7_PE1	11	11	0	2.8918	0.000584653	-0.810964	-8.06638	2.87889	0.00129295	-0.881026	-8.0036	P17706	PTN2_HUMAN	PTPN2	Tyrosine-protein phosphatase non-receptor type 2
25.0939	25.0609	25.0387	25.4366	25.4359	25.389	25.4664	25.4317	25.4578	+	+	PE3_PE1;PE7_PE1	36	33	0	4.03281	0	0.355999	15.8445	4.4553	0.000260163	0.387461	20.2585	P17812	PYRG1_HUMAN	CTPS1	CTP synthase 1
27.523	27.4225	27.4402	27.1484	27.1568	27.1571	27.1678	27.2157	27.1901	+	+	PE3_PE1;PE7_PE1	37	28	0	3.23345	0.000327145	-0.307793	-9.9005	2.87512	0.00128867	-0.270724	-7.98536	P17844	DDX5_HUMAN	DDX5	Probable ATP-dependent RNA helicase DDX5
24.8329	24.8088	24.8678	24.7677	24.7546	24.6705	24.7081	24.8371	24.6939	+		PE3_PE1	28	28	0	1.40801	0.0167378	-0.105537	-3.02209	0.86094	0.0689576	-0.0901121	-1.85156	P17858	PFKAL_HUMAN	PFKL	ATP-dependent 6-phosphofructokinase
24.1357	24.1719	24.1385	24.36	24.3744	24.3559	24.3436	24.3835	24.3164	+	+	PE3_PE1;PE7_PE1	6	6	0	4.11513	0	0.214769	16.6233	3.03078	0.00128044	0.199148	8.77101	P17900	SAP3_HUMAN	GM2A	Ganglioside GM2 activator
24.4827	24.4475	24.4287	24.5737	24.569	24.5741	24.6148	24.5438	24.5769	+	+	PE3_PE1;PE7_PE1	11	11	0	2.7729	0.000877153	0.119304	7.50463	2.07865	0.00439106	0.125585	4.84931	P17931	LEG3_HUMAN	LGALS3	Galectin-3
24.7762	24.9094	24.9316	25.0523	25.1289	25.1063	24.9436	25.0154	24.9486	+		PE3_PE1	24	24	0	1.85282	0.00566617	0.223449	4.16974	0.835107	0.073801	0.0968183	1.80033	P17980	PRS6A_HUMAN	PSMC3	26S proteasome regulatory subunit 6A
26.7765	26.7673	26.7724	26.801	26.8406	26.8165	26.8324	26.8285	26.8154	+	+	PE3_PE1;PE7_PE1	33	33	0	1.7939	0.00647837	0.0473194	4.00427	3.11821	0.00119766	0.0533829	9.24276	P17987	TCPA_HUMAN	TCP1	T-complex protein 1 subunit alpha
24.005	23.8644	23.9271	24.6121	24.6515	24.619	24.6664	24.7193	24.7278	+	+	PE3_PE1;PE7_PE1	26	26	0	4.09093	0	0.695382	16.3906	4.17128	0.00033942	0.772339	17.1759	P18031	PTN1_HUMAN	PTPN1	Tyrosine-protein phosphatase non-receptor type 1
21.7707	21.7935	21.8495	22.2915	22.3186	22.2466	22.1657	22.3658	22.3993	+	+	PE3_PE1;PE7_PE1	26	26	0	3.9721	0	0.480984	15.293	2.56396	0.00220902	0.505664	6.60093	P18074	ERCC2_HUMAN	ERCC2	General transcription and DNA repair factor IIH helicase subunit XPD
26.7989	26.7505	26.7684	26.8111	26.8188	26.8198	26.7551	26.7483	26.7347	+		PE3_PE1	9	9	0	1.42194	0.0162619	0.0440197	3.05481	0.798615	0.0810852	-0.0265643	-1.72832	P18077	RL35A_HUMAN	RPL35A	Large ribosomal subunit protein eL33
25.6006	25.6316	25.7317	25.7469	25.8156	25.7822	25.6845	25.7757	25.7536	+		PE3_PE1	11	7	0	1.3409	0.0191181	0.126945	2.86682	0.798896	0.0810968	0.0832965	1.72887	P18085	ARF4_HUMAN	ARF4	ADP-ribosylation factor 4
26.7574	26.6988	26.7205	26.6085	26.6462	26.6037	26.5394	26.5845	26.5484	+	+	PE3_PE1;PE7_PE1	22	22	0	2.08621	0.00318278	-0.106063	-4.8734	2.80438	0.00160446	-0.168097	-7.64982	P18124	RL7_HUMAN	RPL7	Large ribosomal subunit protein uL30
20.894	20.8146	20.7989	21.555	21.6776	21.6768	21.5521	21.4561	21.5255	+	+	PE3_PE1;PE7_PE1	36	36	0	4.0419	0	0.800611	15.9288	4.09719	0.000320487	0.6754	16.4505	P18206	VINC_HUMAN	VCL	Vinculin
19.4012	19.4723	19.1806	18.6198	18.6643	18.5734	18.8409	18.2889	18.3981	+	+	PE3_PE1;PE7_PE1	11	10	0	2.87591	0.000658065	-0.732195	-7.98919	1.94088	0.00575785	-0.842079	-4.4259	P18433	PTPRA_HUMAN	PTPRA	Receptor-type tyrosine-protein phosphatase alpha
21.9156	21.5655	21.6799	21.716	21.5085	21.3472	21.7443	21.655	21.5338				8	8	0	0.591644	0.144027	-0.196455	-1.32409	0.251547	0.637506	-0.0759583	-0.634312	P18440	ARY1_HUMAN	NAT1	Arylamine N-acetyltransferase 1
23.7912	23.7896	23.7924	23.1113	23.1044	23.0935	23.101	23.1032	23.0794	+	+	PE3_PE1;PE7_PE1	49	49	0	7.68973	0	-0.688021	-130.896	7.06491	0	-0.696534	-91.3438	P18583	SON_HUMAN	SON	Protein SON
22.571	22.4585	22.6377	22.2608	22.268	22.1372	22.1056	22.1536	22.1493	+	+	PE3_PE1;PE7_PE1	18	18	0	2.11133	0.00293561	-0.333699	-4.95407	2.81477	0.00157789	-0.419548	-7.69831	P18615	NELFE_HUMAN	NELFE	Negative elongation factor E
26.8463	26.8026	26.7686	26.639	26.6316	26.6429	26.6652	26.6435	26.6675	+	+	PE3_PE1;PE7_PE1	10	10	0	2.74774	0.000911488	-0.167987	-7.39032	2.46165	0.00253859	-0.147097	-6.19394	P18621	RL17_HUMAN	RPL17	Large ribosomal subunit protein uL22
27.5289	27.6359	27.6494	27.6013	27.7105	27.6192	27.6546	27.718	27.6852				19	10	0	0.31218	0.465042	0.0389481	0.764225	0.895236	0.0629332	0.0811869	1.91993	P18669	PGAM1_HUMAN	PGAM1	Phosphoglycerate mutase 1
24.362	24.2563	24.2508	24.3091	24.3558	24.3454	24.4228	24.4484	24.4289		+	PE7_PE1	14	14	0	0.533462	0.175908	0.0470403	1.21034	1.74921	0.00834109	0.143649	3.88171	P18754	RCC1_HUMAN	RCC1	Regulator of chromosome condensation
26.6818	26.6348	26.6052	26.8513	26.8778	26.8325	26.7895	26.7621	26.771	+	+	PE3_PE1;PE7_PE1	8	8	0	2.92647	0.000491722	0.213249	8.23717	2.30996	0.00320592	0.133604	5.62944	P18827	SDC1_HUMAN	SDC1	Syndecan-1
22.6776	22.6432	22.689	22.4406	22.4562	22.5422	22.4556	22.4876	22.625	+	+	PE3_PE1;PE7_PE1	5	3	0	2.27993	0.00207359	-0.190294	-5.52285	1.28392	0.0237581	-0.147207	-2.73807	P18846	ATF1_HUMAN	ATF1	Cyclic AMP-dependent transcription factor ATF-1
19.377	19.2514	19.3701	19.774	19.7479	19.6892	19.8508	19.8605	20.0343	+	+	PE3_PE1;PE7_PE1	13	13	0	2.96768	0.000503817	0.404214	8.44444	2.89129	0.00130213	0.582357	8.06387	P18850	ATF6A_HUMAN	ATF6	Cyclic AMP-dependent transcription factor ATF-6 alpha
23.4518	23.3655	23.4532	22.9958	22.9546	22.9396	23.0303	23.0859	23.0795	+	+	PE3_PE1;PE7_PE1	39	39	0	3.78859	9.05109e-05	-0.460173	-13.7369	3.34417	0.00087208	-0.358262	-10.5734	P18858	DNLI1_HUMAN	LIG1	DNA ligase 1
26.23	26.3546	26.3094	25.9787	26.0285	26.0015	26.1809	26.1108	26.1411	+	+	PE3_PE1;PE7_PE1	6	6	0	2.77965	0.00083071	-0.29516	-7.53555	1.67601	0.00983202	-0.153739	-3.68637	P18859	ATP5J_HUMAN	ATP5PF	ATP synthase-coupling factor 6
22.9823	23.0136	23.0271	23.2639	23.3001	23.2375	23.267	23.3849	23.3449	+	+	PE3_PE1;PE7_PE1	25	25	0	3.49234	0.000146746	0.259516	11.5416	3.02748	0.00127398	0.324603	8.75366	P18887	XRCC1_HUMAN	XRCC1	DNA repair protein XRCC1
17.5995	17.3538	17.2245	17.1269	16.8622	17.1032	17.3819	16.5188	16.6302	+		PE3_PE1	11	11	0	1.22495	0.0252426	-0.361809	-2.60755	0.873563	0.0669265	-0.548964	-1.87668	P19021	AMD_HUMAN	PAM	Peptidyl-glycine alpha-amidating monooxygenase
22.0671	21.8987	21.916	21.9092	21.9182	21.9177	21.9003	21.913	21.8754				39	39	0	0.353416	0.372295	-0.0455424	-0.850052	0.517189	0.191554	-0.0643724	-1.17839	P19174	PLCG1_HUMAN	PLCG1	1-phosphatidylinositol 4
21.3388	21.1862	21.2107	21.202	21.2638	21.2747	21.3085	21.5306	21.2436				3	3	0	0.010211	0.990659	0.00162506	0.0309895	0.512331	0.194903	0.115671	1.16883	P19256	LFA3_HUMAN	CD58	Lymphocyte function-associated antigen 3
28.2785	28.2891	28.2758	28.3771	28.4219	28.3849	28.4089	28.4262	28.4316	+	+	PE3_PE1;PE7_PE1	31	31	0	2.85163	0.000700159	0.113508	7.87251	4.22626	0.000213333	0.141106	17.7344	P19338	NUCL_HUMAN	NCL	Nucleolin
22.8072	22.8387	22.8986	23.7175	23.7539	23.7338	23.7291	23.7435	23.7436	+	+	PE3_PE1;PE7_PE1	43	37	0	5.17896	0	0.886943	30.7975	5.28346	0.000327645	0.890581	32.7136	P19367	HXK1_HUMAN	HK1	Hexokinase-1
23.0464	23.0411	23.0902	22.6899	22.7875	22.7412	22.8371	22.8899	22.885	+	+	PE3_PE1;PE7_PE1	12	12	0	3.23734	0.000328463	-0.319685	-9.92345	2.92287	0.00132992	-0.188546	-8.21929	P19387	RPB3_HUMAN	POLR2C	DNA-directed RNA polymerase II subunit RPB3
23.6913	23.6843	23.838	24.1337	24.0746	24.1311	23.9686	24.1853	23.9881	+	+	PE3_PE1;PE7_PE1	10	10	0	2.65733	0.000961843	0.375282	6.99223	1.65109	0.0104383	0.309459	3.62131	P19388	RPAB1_HUMAN	POLR2E	DNA-directed RNA polymerases I
22.8662	23.0034	23.0539	22.3053	22.2605	22.2903	22.2499	22.2358	22.231	+	+	PE3_PE1;PE7_PE1	4	4	0	3.55272	0.000152803	-0.689132	-11.9598	3.70067	0.000670096	-0.735601	-13.0467	P19397	CD53_HUMAN	CD53	Leukocyte surface antigen CD53
24.9318	24.7522	24.9371	23.5326	23.5427	23.5686	23.5968	23.5744	23.4681	+	+	PE3_PE1;PE7_PE1	15	15	0	4.55696	0	-1.32574	-21.489	4.27934	0.000223776	-1.32728	-18.2903	P19404	NDUV2_HUMAN	NDUFV2	NADH dehydrogenase [ubiquinone] flavoprotein 2
23.2882	23.1927	23.2696	24.2638	24.2746	24.2598	24.1764	24.16	24.1629	+	+	PE3_PE1;PE7_PE1	16	3	0	5.36881	0	1.01593	34.366	5.18388	0.000278261	0.916289	30.8851	P19440	GGT1_HUMAN	GGT1	Glutathione hydrolase 1 proenzyme
21.1358	21.1231	21.1417	21.2469	21.1904	21.1888	21.1745	21.2368	21.2635	+	+	PE3_PE1;PE7_PE1	26	26	0	1.71166	0.00809499	0.0751375	3.78069	1.56152	0.0121851	0.0913995	3.39331	P19447	ERCC3_HUMAN	ERCC3	General transcription and DNA repair factor IIH helicase/translocase subunit XPB
21.5002	21.5075	21.5828	21.6421	21.5763	21.5908	21.4102	21.5557	21.379	+		PE3_PE1	20	20	0	1.03424	0.0406759	0.0728874	2.20227	0.60686	0.14142	-0.0818831	-1.35375	P19474	RO52_HUMAN	TRIM21	E3 ubiquitin-protein ligase TRIM21
23.7914	23.8863	23.8025	24.0242	24.051	24.0172	23.9106	23.9801	23.9709	+	+	PE3_PE1;PE7_PE1	23	23	0	2.5246	0.00134582	0.204081	6.44174	1.57705	0.011755	0.127138	3.43221	P19525	E2AK2_HUMAN	EIF2AK2	Interferon-induced
20.2547	19.942	20.0674	20.0025	19.9398	20.056	19.8227	20.2293	19.7938				8	6	0	0.38508	0.319653	-0.0886161	-0.914868	0.345177	0.392832	-0.139456	-0.83304	P19532	TFE3_HUMAN	TFE3	Transcription factor E3
25.8723	25.8253	25.7903	26.4888	26.4689	26.4754	26.3455	26.4133	26.3936	+	+	PE3_PE1;PE7_PE1	18	18	0	4.92034	0	0.648411	26.5214	4.23424	0.000215006	0.554829	17.8169	P19623	SPEE_HUMAN	SRM	Spermidine synthase
19.8463	20.0003	19.676	21.0204	20.9471	20.9133	20.7735	20.9398	20.8623	+	+	PE3_PE1;PE7_PE1	5	4	0	3.45977	0.000143104	1.11942	11.3218	3.19318	0.00109959	1.01769	9.66586	P19634	SL9A1_HUMAN	SLC9A1	Sodium/hydrogen exchanger 1
23.8151	23.8219	23.9052	22.7086	22.7502	22.7826	22.7104	22.745	22.6687	+	+	PE3_PE1;PE7_PE1	17	17	0	5.16412	0	-1.10028	-30.5346	5.20559	0.00029003	-1.13938	-31.275	P19784	CSK22_HUMAN	CSNK2A2	Casein kinase II subunit alpha'
24.1432	24.0773	24.1011	23.9009	23.8794	23.8535	24.1613	24.2292	24.0715	+		PE3_PE1	11	11	0	3.19995	0.000320866	-0.229256	-9.70493	0.399711	0.302974	0.0468197	0.944549	P19823	ITIH2_HUMAN	ITIH2	Inter-alpha-trypsin inhibitor heavy chain H2
21.3779	21.3634	21.5215	21.1261	21.1072	21.1359	21.1682	21.1643	21.2759	+	+	PE3_PE1;PE7_PE1	27	27	0	2.36316	0.00171517	-0.297893	-5.82233	1.60408	0.0113107	-0.218136	-3.50055	P19838	NFKB1_HUMAN	NFKB1	Nuclear factor NF-kappa-B p105 subunit
23.3933	23.4511	23.488	22.9868	22.9696	22.9721	22.8013	22.8191	22.8179	+	+	PE3_PE1;PE7_PE1	20	20	0	4.11846	0	-0.467988	-16.6557	4.62928	0.000154093	-0.631383	-22.409	P19971	TYPH_HUMAN	TYMP	Thymidine phosphorylase
20.8085	20.9229	20.9347	21.5932	21.5678	21.7242	21.6522	21.5612	21.5953	+	+	PE3_PE1;PE7_PE1	16	15	0	3.5221	0.000149668	0.739701	11.7459	3.9182	0.000381944	0.714191	14.819	P20020	AT2B1_HUMAN	ATP2B1	Plasma membrane calcium-transporting ATPase 1
25.2896	25.3273	25.3984	25.3025	25.3164	25.2916	25.3338	25.3748	25.3518				27	27	0	0.461361	0.23037	-0.034928	-1.0681	0.166311	0.807416	0.0150191	0.441226	P20042	IF2B_HUMAN	EIF2S2	Eukaryotic translation initiation factor 2 subunit 2
25.7467	25.7887	25.7496	25.5102	25.5249	25.5185	25.4694	25.4762	25.4995	+	+	PE3_PE1;PE7_PE1	22	22	0	4.17175	0	-0.243806	-17.1806	4.16978	0.000338692	-0.27994	-17.1609	P20073	ANXA7_HUMAN	ANXA7	Annexin A7
21.1694	20.2911	20.798	20.418	20.114	20.152	20.4435	20.647	20.288				3	2	0	0.900322	0.057325	-0.524857	-1.93011	0.460841	0.235237	-0.293399	-1.06706	P20226	TBP_HUMAN	TBP	TATA-box-binding protein
19.4771	19.8272	20.1105	19.5944	19.6551	19.5446	19.8743	19.5547	19.8162				8	7	0	0.483873	0.21116	-0.206905	-1.11271	0.097405	0.89891	-0.0565414	-0.271994	P20248	CCNA2_HUMAN	CCNA2	Cyclin-A2
24.097	24.21	24.3278	23.9084	24.206	24.2211	23.6869	24.0537	24.0347		+	PE7_PE1	9	9	0	0.338801	0.401853	-0.0997575	-0.819831	0.983014	0.0493592	-0.286446	-2.09714	P20290	BTF3_HUMAN	BTF3	Transcription factor BTF3
19.0786	19.3013	19.6599	21.2641	21.6926	21.6119	21.3988	21.526	21.3337	+	+	PE3_PE1;PE7_PE1	6	5	0	3.2754	0.000335046	2.17628	10.1506	3.50269	0.000859296	2.07292	11.6123	P20336	RAB3A_HUMAN	RAB3A	Ras-related protein Rab-3A
22.0184	22.0628	22.1997	22.2855	22.4994	22.6044	22.3962	22.5271	22.3247	+	+	PE3_PE1;PE7_PE1	5	4	0	1.5659	0.0114055	0.369457	3.40427	1.79362	0.00765079	0.322383	4.00349	P20337	RAB3B_HUMAN	RAB3B	Ras-related protein Rab-3B
22.4807	22.3764	22.3921	22.3309	22.1928	22.3472	22.2617	22.3522	22.3662	+		PE3_PE1	11	9	0	1.00732	0.0430455	-0.126125	-2.14685	0.908425	0.0608572	-0.0897528	-1.94635	P20338	RAB4A_HUMAN	RAB4A	Ras-related protein Rab-4A
22.2183	22.4304	22.265	22.2123	22.0659	22.1493	22.1063	22.1357	22.3033	+		PE3_PE1	5	5	0	0.986156	0.0454301	-0.162114	-2.10355	0.620808	0.135262	-0.122786	-1.38093	P20339	RAB5A_HUMAN	RAB5A	Ras-related protein Rab-5A
24.6064	24.4269	24.5369	24.7368	24.7796	24.7067	24.7497	24.7796	24.6671	+	+	PE3_PE1;PE7_PE1	11	4	0	1.74122	0.00746139	0.217631	3.86008	1.54763	0.0124433	0.208768	3.35873	P20340	RAB6A_HUMAN	RAB6A	Ras-related protein Rab-6A
25.3382	25.2162	25.2595	25.2565	25.2087	25.2337	25.248	25.2149	25.2335				42	42	0	0.427612	0.265637	-0.0383097	-1.00074	0.457041	0.23814	-0.0391623	-1.0595	P20585	MSH3_HUMAN	MSH3	DNA mismatch repair protein Msh3
25.5017	25.4726	25.4577	26.1839	26.2244	26.1738	26.1114	26.1497	26.1223	+	+	PE3_PE1;PE7_PE1	40	36	0	5.42741	0	0.71669	35.5483	5.53121	0.000457143	0.650494	37.7428	P20591	MX1_HUMAN	MX1	Interferon-induced GTP-binding protein Mx1
25.9562	25.9662	25.9551	25.8748	25.87	25.8877	25.8348	25.8957	25.8356	+	+	PE3_PE1;PE7_PE1	11	11	0	3.67171	8.28877e-05	-0.0816593	-12.8268	2.14453	0.00413015	-0.103781	-5.06227	P20618	PSB1_HUMAN	PSMB1	Proteasome subunit beta type-1
25.3688	25.3082	25.3995	25.4908	25.5181	25.5686	25.6318	25.6028	25.7063	+	+	PE3_PE1;PE7_PE1	10	10	0	2.04546	0.00346709	0.166947	4.74466	2.67139	0.00182262	0.288087	7.05288	P20645	MPRD_HUMAN	M6PR	Cation-dependent mannose-6-phosphate receptor
26.9276	26.944	26.9005	26.3043	26.3078	26.3068	26.3125	26.3163	26.3269	+	+	PE3_PE1;PE7_PE1	9	9	0	5.96807	0	-0.617726	-48.5567	5.84429	0.000666667	-0.605484	-45.2124	P20674	COX5A_HUMAN	COX5A	Cytochrome c oxidase subunit 5A
26.0382	26.0896	26.0845	25.8453	25.8778	25.8508	25.8615	25.938	25.9128	+	+	PE3_PE1;PE7_PE1	42	42	0	3.42607	0.000140192	-0.212812	-11.0986	2.40975	0.00278199	-0.166691	-5.99572	P20700	LMNB1_HUMAN	LMNB1	Lamin-B1
21.6328	21.6083	21.6041	22.4949	22.5606	22.4416	22.4296	22.4668	22.4699	+	+	PE3_PE1;PE7_PE1	30	30	0	4.80836	0	0.883912	24.8577	6.13229	0.00103226	0.840309	53.3773	P20701	ITAL_HUMAN	ITGAL	Integrin alpha-L
21.8541	22.1318	21.8429	21.4049	21.0805	21.28	21.6072	21.7727	21.7541	+	+	PE3_PE1;PE7_PE1	3	3	0	2.17037	0.0025503	-0.687793	-5.14774	1.00594	0.0464536	-0.231592	-2.14402	P20742	PZP_HUMAN	PZP	Pregnancy zone protein
19.4318	19.8463	19.5787	19.5642	19.2922	18.997	19.2471	19.4354	19.4282				8	8	0	0.754142	0.0865599	-0.334466	-1.64101	0.848879	0.0711469	-0.248686	-1.82762	P20749	BCL3_HUMAN	BCL3	B-cell lymphoma 3 protein
17.6306	18.0145	18.2539	17.7077	17.5019	17.141	17.922	17.9132	18.0188	+		PE3_PE1	4	4	0	0.984664	0.0455937	-0.516146	-2.1005	0.0273002	0.973055	-0.015021	-0.0813466	P20774	MIME_HUMAN	OGN	Mimecan
23.1536	23.1278	23.2239	22.8821	22.7691	22.8667	22.6796	22.8001	22.7488	+	+	PE3_PE1;PE7_PE1	31	31	0	2.71038	0.000942222	-0.329126	-7.22346	3.14948	0.00117344	-0.425623	-9.41708	P20810	ICAL_HUMAN	CAST	Calpastatin
22.9393	23.0057	23.0474	23.7553	23.7782	23.7864	23.7977	23.8059	23.7158	+	+	PE3_PE1;PE7_PE1	24	24	0	4.72163	0	0.77578	23.6404	4.26968	0.000221709	0.775619	18.1879	P20839	IMDH1_HUMAN	IMPDH1	Inosine-5'-monophosphate dehydrogenase 1
21.8256	22.0366	21.9931	21.5197	21.5614	21.5045	21.5203	21.6997	21.5455	+	+	PE3_PE1;PE7_PE1	7	7	0	2.50453	0.0014127	-0.423219	-6.36183	1.88321	0.00636678	-0.363255	-4.25694	P20933	ASPG_HUMAN	AGA	N(4)-(beta-N-acetylglucosaminyl)-L-asparaginase
21.2362	21.316	21.2914	20.9163	20.8607	20.9204	20.6912	20.734	20.6795	+	+	PE3_PE1;PE7_PE1	31	31	0	3.63351	8.06242e-05	-0.382076	-12.5421	4.44167	0.000256	-0.579659	-20.0988	P20936	RASA1_HUMAN	RASA1	Ras GTPase-activating protein 1
24.6691	24.5546	24.715	24.4205	24.2864	24.3424	24.3864	24.4985	24.4406	+	+	PE3_PE1;PE7_PE1	5	5	0	2.06854	0.00325858	-0.296452	-4.81725	1.6217	0.0109269	-0.204398	-3.54553	P20962	PTMS_HUMAN	PTMS	Parathymosin
22.3349	22.6332	22.5659	22.7653	22.673	22.5241	22.6572	22.732	22.7086				4	4	0	0.552443	0.164274	0.142765	1.24752	0.945672	0.0547896	0.187956	2.02133	P21127	CD11B_HUMAN	CDK11B	Cyclin-dependent kinase 11B
24.1721	24.1315	24.179	24.2	24.2311	24.166	24.1787	24.162	24.1937				26	19	0	0.730366	0.0931413	0.0381851	1.59449	0.422516	0.273886	0.0172526	0.990513	P21281	VATB2_HUMAN	ATP6V1B2	V-type proton ATPase subunit B
24.4425	24.4467	24.5037	24.6081	24.598	24.5961	24.5795	24.5905	24.5216	+	+	PE3_PE1;PE7_PE1	28	27	0	2.60937	0.00109449	0.136384	6.78881	1.57276	0.0118397	0.0995642	3.42143	P21283	VATC1_HUMAN	ATP6V1C1	V-type proton ATPase subunit C 1
25.5129	25.4876	25.537	25.292	25.3378	25.2082	25.2939	25.3171	25.2329	+	+	PE3_PE1;PE7_PE1	13	13	0	2.34341	0.00186228	-0.233138	-5.75011	2.88005	0.00129456	-0.23122	-8.00923	P21291	CSRP1_HUMAN	CSRP1	Cysteine and glycine-rich protein 1
24.3061	24.2672	24.2976	23.1852	23.1582	23.168	23.2221	23.2412	23.2235	+	+	PE3_PE1;PE7_PE1	124	113	0	6.81042	0	-1.11988	-78.891	6.82853	0.003	-1.06137	-79.7179	P21333	FLNA_HUMAN	FLNA	Filamin-A
22.0427	22.0416	22.03	22.0828	22.1402	22.0604	22.1346	22.0758	22.1592	+	+	PE3_PE1;PE7_PE1	54	54	0	1.09934	0.0345263	0.0563736	2.33799	1.56196	0.0121195	0.0850773	3.39441	P21359	NF1_HUMAN	NF1	Neurofibromin
21.6716	21.9136	21.6051	19.8858	19.9769	19.9415	19.9658	19.701	19.984	+	+	PE3_PE1;PE7_PE1	10	8	0	4.29234	0	-1.79538	-18.4291	3.83307	0.000359771	-1.84649	-14.0994	P21397	AOFA_HUMAN	MAOA	Amine oxidase [flavin-containing] A
24.5327	24.4989	24.475	25.3462	25.38	25.3481	25.3071	25.3602	25.3558	+	+	PE3_PE1;PE7_PE1	43	42	0	5.74779	0	0.855858	42.7651	5.40762	0.000387097	0.838806	35.1445	P21399	ACOHC_HUMAN	ACO1	Cytoplasmic aconitate hydratase
21.1961	21.247	21.2087	21.1793	21.0641	21.3147	21.2551	20.9694	20.9899				10	7	0	0.158205	0.826362	-0.0312398	-0.422034	0.714072	0.102346	-0.145765	-1.56267	P21579	SYT1_HUMAN	SYT1	Synaptotagmin-1
23.9184	23.8987	23.8727	22.9771	23.086	23.1035	23.0425	23.059	23.1007	+	+	PE3_PE1;PE7_PE1	30	30	0	4.44745	0	-0.841085	-20.1664	5.54562	0.000463768	-0.829189	-38.0579	P21580	TNAP3_HUMAN	TNFAIP3	Tumor necrosis factor alpha-induced protein 3
20.0375	19.9901	20.0084	19.677	19.6617	19.9561	19.7628	19.8561	19.9851	+	+	PE3_PE1;PE7_PE1	18	9	0	1.20117	0.0267677	-0.24706	-2.55567	1.02594	0.0442053	-0.144011	-2.18514	P21675	TAF1_HUMAN	TAF1	Transcription initiation factor TFIID subunit 1
28.0557	27.9792	28.0526	27.9223	27.9319	27.9361	27.9377	27.9677	27.949	+	+	PE3_PE1;PE7_PE1	19	19	0	1.76065	0.00696008	-0.0990938	-3.91284	1.37058	0.0188548	-0.0777245	-2.93499	P21796	VDAC1_HUMAN	VDAC1	Non-selective voltage-gated ion channel VDAC1
25.2763	25.3405	25.356	25.3491	25.3514	25.3595	25.3744	25.3857	25.4118		+	PE7_PE1	17	17	0	0.519308	0.184525	0.0290972	1.18255	1.16491	0.0313911	0.0663783	2.47735	P21912	SDHB_HUMAN	SDHB	Succinate dehydrogenase [ubiquinone] iron-sulfur subunit
24.1106	24.071	23.9432	20.6375	20.8748	20.2183	20.6271	20.576	20.3855	+	+	PE3_PE1;PE7_PE1	4	4	0	4.19926	0	-3.46473	-17.4579	5.60472	0.000507937	-3.5121	-39.3779	P21926	CD9_HUMAN	CD9	CD9 antigen
22.898	22.9725	22.9312	22.8196	22.9109	22.7763	22.7431	22.7208	22.6994	+	+	PE3_PE1;PE7_PE1	8	8	0	1.02263	0.0416349	-0.0983461	-2.17833	2.98288	0.00132801	-0.212807	-8.52205	P21953	ODBB_HUMAN	BCKDHB	2-oxoisovalerate dehydrogenase subunit beta
22.2102	22.3087	22.2128	23.2266	23.3407	23.3402	22.9463	23.2598	23.1595	+	+	PE3_PE1;PE7_PE1	12	12	0	4.53431	0	1.0586	21.2087	3.06721	0.00116643	0.877988	8.96481	P21964	COMT_HUMAN	COMT	Catechol O-methyltransferase
20.1145	19.8652	19.885	20.4396	20.3063	20.3252	20.069	20.3725	20.2051	+	+	PE3_PE1;PE7_PE1	9	4	0	1.95155	0.00421764	0.40214	4.4577	1.03041	0.0437136	0.260651	2.19437	P22001	KCNA3_HUMAN	KCNA3	Potassium voltage-gated channel subfamily A member 3
19.473	19.8717	19.3288	20.4905	20.0339	20.5821	20.0458	19.7093	20.1013	+		PE3_PE1	2	2	0	1.58608	0.0108566	0.811012	3.45494	0.904594	0.0614493	0.394282	1.93867	P22004	BMP6_HUMAN	BMP6	Bone morphogenetic protein 6
22.8819	22.8209	22.8778	22.7027	22.7136	22.6648	22.7344	22.6988	22.6868	+	+	PE3_PE1;PE7_PE1	26	26	0	2.60403	0.00116521	-0.166494	-6.76646	2.49229	0.00251081	-0.153517	-6.3135	P22033	MUTA_HUMAN	MMUT	Methylmalonyl-CoA mutase
23.9119	23.824	23.837	23.8148	23.8355	23.8281	23.8059	23.7829	23.792		+	PE7_PE1	35	33	0	0.48893	0.206683	-0.031503	-1.12271	1.06696	0.0400746	-0.0640329	-2.27018	P22059	OSBP1_HUMAN	OSBP	Oxysterol-binding protein 1
25.1753	25.1892	25.232	24.917	25.0012	24.9649	25.0297	24.9741	24.9705	+	+	PE3_PE1;PE7_PE1	11	11	0	2.87734	0.000659128	-0.237797	-7.9961	2.89597	0.00130705	-0.207387	-8.08675	P22061	PIMT_HUMAN	PCMT1	Protein-L-isoaspartate(D-aspartate) O-methyltransferase
26.2606	26.2047	26.1318	25.9528	25.9978	25.9345	26.0565	26.1187	26.091	+	+	PE3_PE1;PE7_PE1	21	18	0	2.32493	0.00197282	-0.237359	-5.68317	1.25019	0.0256061	-0.110293	-2.66307	P22087	FBRL_HUMAN	FBL	rRNA 2'-O-methyltransferase fibrillarin
26.2008	26.1103	26.1707	25.3963	25.442	25.3794	25.4171	25.4118	25.4031	+	+	PE3_PE1;PE7_PE1	46	46	0	4.6885	0	-0.754665	-23.1912	5.00414	0.000230769	-0.749955	-27.8382	P22102	PUR2_HUMAN	GART	Trifunctional purine biosynthetic protein adenosine-3
26.8019	26.8331	26.8183	26.7173	26.7371	26.7244	26.672	26.6567	26.6445	+	+	PE3_PE1;PE7_PE1	23	23	0	2.98635	0.000467066	-0.0914847	-8.53986	3.73697	0.000690909	-0.160042	-13.3275	P22234	PUR6_HUMAN	PAICS	Bifunctional phosphoribosylaminoimidazole carboxylase/phosphoribosylaminoimidazole succinocarboxamide synthetase
18.3009	17.9519	17.7496	18.5407	18.5212	18.6132	18.5196	18.893	18.6228	+	+	PE3_PE1;PE7_PE1	8	8	0	1.56897	0.0113906	0.557533	3.41193	1.58895	0.0116729	0.677656	3.4622	P22304	IDS_HUMAN	IDS	Iduronate 2-sulfatase
25.3975	25.3568	25.4074	25.1996	25.2509	25.1407	25.2244	25.2508	25.237	+	+	PE3_PE1;PE7_PE1	20	20	0	2.23658	0.00226604	-0.190186	-5.37192	3.01202	0.00131639	-0.149812	-8.67273	P22307	SCP2_HUMAN	SCP2	Sterol carrier protein 2
26.4834	26.4546	26.4802	26.4749	26.4694	26.4516	26.4511	26.514	26.5066				50	50	0	0.25771	0.624359	-0.00745455	-0.647756	0.337592	0.408238	0.0178432	0.817323	P22314	UBA1_HUMAN	UBA1	Ubiquitin-like modifier-activating enzyme 1
17.6963	17.7251	17.6275	19.5633	19.2376	19.5097	17.9617	18.9182	18.9461	+	+	PE3_PE1;PE7_PE1	2	2	0	4.12505	0	1.75387	16.7197	1.33317	0.0207615	0.925684	2.84919	P22352	GPX3_HUMAN	GPX3	Glutathione peroxidase 3
28.4656	28.4287	28.4585	28.5569	28.5327	28.4871	28.4536	28.4847	28.5656	+		PE3_PE1	9	3	0	1.48038	0.0141934	0.0746746	3.19418	0.64627	0.124929	0.050422	1.43052	P22392	NDKB_HUMAN	NME2	Nucleoside diphosphate kinase B
21.2861	21.2848	21.4969	21.192	21.3008	21.3204	21.227	21.1968	21.3869				4	4	0	0.451034	0.240067	-0.0848668	-1.04755	0.393681	0.311077	-0.0856857	-0.932336	P22415	USF1_HUMAN	USF1	Upstream stimulatory factor 1
22.8723	22.7287	22.7697	24.8107	24.7751	24.8175	24.8848	24.9809	24.95	+	+	PE3_PE1;PE7_PE1	28	28	0	5.83694	0	2.01088	45.021	5.71362	0.000578313	2.14834	41.9306	P22570	ADRO_HUMAN	FDXR	NADPH:adrenodoxin oxidoreductase
29.7098	29.7494	29.7693	29.501	29.6535	29.6306	29.5018	29.5904	29.5968	+	+	PE3_PE1;PE7_PE1	27	26	0	1.36494	0.0179442	-0.147813	-2.92198	2.15492	0.0040856	-0.179879	-5.09648	P22626	ROA2_HUMAN	HNRNPA2B1	Heterogeneous nuclear ribonucleoproteins A2/B1
21.8096	21.6989	21.6392	21.5255	21.3932	21.2385	21.3552	21.3986	21.3995	+	+	PE3_PE1;PE7_PE1	21	16	0	1.5687	0.0113855	-0.330181	-3.41126	2.50787	0.00240679	-0.331517	-6.37508	P22670	RFX1_HUMAN	RFX1	MHC class II regulatory factor RFX1
22.5223	22.3959	22.5437	22.3115	22.223	22.2333	22.2602	22.281	22.2648	+	+	PE3_PE1;PE7_PE1	28	26	0	1.8951	0.00528683	-0.23139	-4.29138	2.03057	0.00479497	-0.21866	-4.69828	P22681	CBL_HUMAN	CBL	E3 ubiquitin-protein ligase CBL
19.3817	19.3454	19.2303	18.9471	19.4508	18.8915	19.1622	19.4713	18.7957				4	4	0	0.534451	0.17541	-0.222652	-1.21228	0.367008	0.352857	-0.176046	-0.877979	P22694	KAPCB_HUMAN	PRKACB	cAMP-dependent protein kinase catalytic subunit beta
26.0549	25.999	26.0337	25.7378	25.8067	25.7286	25.7451	25.861	25.7977	+	+	PE3_PE1;PE7_PE1	17	17	0	3.10826	0.000344604	-0.271514	-9.18795	2.4421	0.00267149	-0.227968	-6.11865	P22695	QCR2_HUMAN	UQCRC2	Cytochrome b-c1 complex subunit 2
20.6815	20.6305	20.5239	20.8587	20.3308	20.4156	19.8906	20.3671	19.5111		+	PE7_PE1	2	2	0	0.170912	0.808131	-0.0769151	-0.452045	1.28242	0.0238783	-0.689018	-2.7347	P22794	EVI2A_HUMAN	EVI2A	Protein EVI2A
23.2524	23.1834	23.221	22.5662	22.5597	22.5858	22.6129	22.6994	22.528	+	+	PE3_PE1;PE7_PE1	17	17	0	5.1477	0	-0.648408	-30.2464	3.46385	0.000834146	-0.605513	-11.3491	P22830	HEMH_HUMAN	FECH	Ferrochelatase
20.2194	20.7392	20.6588	20.3905	20.7296	20.5126	20.5249	20.7813	20.6631				5	5	0	0.00890918	0.991513	0.00513204	0.0270777	0.263453	0.605023	0.117322	0.660228	P23025	XPA_HUMAN	XPA	DNA repair protein complementing XP-A cells
22.1117	21.844	21.8859	21.9632	22.0757	21.7459	22.0546	22.3862	22.0633				6	6	0	0.0509413	0.952013	-0.0189164	-0.148246	0.738265	0.0957007	0.22086	1.60994	P23142	FBLN1_HUMAN	FBLN1	Fibulin-1
23.4219	23.5769	23.5511	22.9237	22.943	22.9355	22.8868	22.9625	22.9457	+	+	PE3_PE1;PE7_PE1	21	18	0	3.5682	0.000154229	-0.582561	-12.0693	3.41196	0.000918571	-0.584946	-11.0064	P23193	TCEA1_HUMAN	TCEA1	Transcription elongation factor A protein 1
20.161	19.7874	19.6922	18.377	18.7148	18.9873	18.8293	18.9672	18.5522	+	+	PE3_PE1;PE7_PE1	5	5	0	2.19357	0.00248197	-1.18717	-5.22541	2.3669	0.0030897	-1.09731	-5.83609	P23219	PGH1_HUMAN	PTGS1	Prostaglandin G/H synthase 1
20.1294	20.0733	20.0813	21.7878	21.803	21.7736	21.8178	21.8134	21.8217	+	+	PE3_PE1;PE7_PE1	40	40	0	6.97899	0	1.69345	86.9341	7.17527	0	1.72297	97.3372	P23229	ITA6_HUMAN	ITGA6	Integrin alpha-6
28.286	28.3111	28.3267	27.9181	27.9591	27.9506	27.9384	28.0053	27.9976	+	+	PE3_PE1;PE7_PE1	32	31	0	4.5321	0	-0.36529	-21.1814	3.75919	0.000706429	-0.32748	-13.5023	P23246	SFPQ_HUMAN	SFPQ	Splicing factor
23.1049	22.924	22.9688	23.1322	23.2307	23.1503	23.0922	23.2211	23.1701	+	+	PE3_PE1;PE7_PE1	19	4	0	1.29398	0.0213554	0.171827	2.76059	1.15259	0.0323904	0.16189	2.45093	P23258	TBG1_HUMAN	TUBG1	Tubulin gamma-1 chain
29.0171	29.0832	29.1187	29.4079	29.5258	29.4625	29.332	29.3983	29.3961	+	+	PE3_PE1;PE7_PE1	14	14	0	3.0127	0.000377816	0.392443	8.6763	2.92125	0.00132709	0.302482	8.21126	P23284	PPIB_HUMAN	PPIB	Peptidyl-prolyl cis-trans isomerase B
18.0088	18.0517	17.9296	17.6741	17.8067	17.874	17.7917	17.9991	18.0434	+		PE3_PE1	4	4	0	1.43238	0.0158779	-0.211751	-3.07948	0.239548	0.668319	-0.0519441	-0.607963	P23327	SRCH_HUMAN	HRC	Sarcoplasmic reticulum histidine-rich calcium-binding protein
25.7861	25.709	25.7558	24.9065	24.9391	24.869	25.0376	24.9782	24.9628	+	+	PE3_PE1;PE7_PE1	28	27	0	5.01275	0	-0.845393	-27.9772	4.72456	0.000170213	-0.757434	-23.6806	P23368	MAOM_HUMAN	ME2	NAD-dependent malic enzyme
23.8767	23.8928	23.9428	24.0372	24.1443	24.059	24.0534	24.0646	24.0861	+	+	PE3_PE1;PE7_PE1	23	23	0	1.99973	0.00384632	0.176113	4.60326	2.75618	0.00159783	0.163986	7.42849	P23381	SYWC_HUMAN	WARS1	Tryptophan--tRNA ligase
28.0207	27.915	28.0005	27.9143	27.9276	27.8542	27.8712	27.9753	27.8869				20	20	0	0.948198	0.0501297	-0.0800349	-2.02644	0.668891	0.117111	-0.0675888	-1.47458	P23396	RS3_HUMAN	RPS3	Small ribosomal subunit protein uS3
24.3179	24.3837	24.3672	23.1601	23.2083	23.0868	23.0739	23.0196	23.0432	+	+	PE3_PE1;PE7_PE1	3	3	0	5.11934	0	-1.20455	-29.7548	6.083	0.000941176	-1.31069	-51.8823	P23434	GCSH_HUMAN	GCSH	Glycine cleavage system H protein
21.439	21.2939	21.276	21.5596	21.5919	21.5299	21.7251	21.7113	21.5196	+	+	PE3_PE1;PE7_PE1	9	9	0	1.8292	0.00596749	0.224131	4.10287	1.70276	0.00946679	0.315679	3.75702	P23443	KS6B1_HUMAN	RPS6KB1	Ribosomal protein S6 kinase beta-1
21.8848	21.7553	21.7761	21.2142	21.0822	20.8216	20.9096	21.0432	21.0746	+	+	PE3_PE1;PE7_PE1	30	28	0	2.48177	0.00143379	-0.76605	-6.27223	3.60443	0.000707167	-0.796284	-12.3295	P23458	JAK1_HUMAN	JAK1	Tyrosine-protein kinase JAK1
20.6915	20.4683	20.5685	20.6163	20.1407	20.4437	20.1577	20.5798	20.2957				8	8	0	0.501424	0.196956	-0.175852	-1.14736	0.761037	0.0899426	-0.231684	-1.65452	P23469	PTPRE_HUMAN	PTPRE	Receptor-type tyrosine-protein phosphatase epsilon
22.4525	22.3849	22.3222	22.3099	22.2613	22.4168	22.353	22.3401	22.2437				19	14	0	0.408697	0.286292	-0.0571728	-0.962702	0.658429	0.120651	-0.0742486	-1.4542	P23497	SP100_HUMAN	SP100	Nuclear autoantigen Sp-100
22.4541	22.4827	22.2362	22.1639	22.3018	22.2172	22.2931	22.3295	22.2937				22	22	0	0.867881	0.0626308	-0.163349	-1.86536	0.470769	0.226109	-0.085577	-1.08677	P23508	CRCM_HUMAN	MCC	Colorectal mutant cancer protein
26.8415	26.7972	26.8006	27.0395	27.1164	27.0768	27.0911	27.1436	27.105	+	+	PE3_PE1;PE7_PE1	25	25	0	3.25465	0.000331976	0.264467	10.0261	3.83966	0.000361248	0.300142	14.1538	P23526	SAHH_HUMAN	AHCY	Adenosylhomocysteinase
29.6365	29.7268	29.752	29.1916	29.2218	29.1662	29.111	29.2134	29.2344	+	+	PE3_PE1;PE7_PE1	21	18	0	3.73081	8.62309e-05	-0.511905	-13.2794	3.25386	0.000946372	-0.518867	-10.0214	P23528	COF1_HUMAN	CFL1	Cofilin-1
25.4079	25.3511	25.3917	25.2973	25.3848	25.354	25.3744	25.4004	25.409				32	32	0	0.551059	0.165189	-0.0382303	-1.24481	0.216064	0.720588	0.0110359	0.555676	P23588	IF4B_HUMAN	EIF4B	Eukaryotic translation initiation factor 4B
20.6531	20.6576	20.6213	20.7739	20.6846	20.7358	20.6276	20.717	20.6504	+		PE3_PE1	6	6	0	1.43798	0.0156549	0.0874392	3.09275	0.29191	0.522753	0.0210342	0.72134	P23610	HAP40_HUMAN	F8A1	40-kDa huntingtin-associated protein
24.3798	24.433	24.4054	23.4528	23.4858	23.4547	23.3178	23.4171	23.432	+	+	PE3_PE1;PE7_PE1	38	22	0	6.02952	0	-0.941645	-50.3073	4.8917	0.000204255	-1.01712	-26.0857	P23634	AT2B4_HUMAN	ATP2B4	Plasma membrane calcium-transporting ATPase 4
21.6617	21.2347	21.5664	21.919	21.922	21.8973	21.9039	21.652	21.9691	+	+	PE3_PE1;PE7_PE1	19	19	0	1.5153	0.0131091	0.425168	3.27905	1.02925	0.0437989	0.354094	2.19196	P23743	DGKA_HUMAN	DGKA	Diacylglycerol kinase alpha
23.6089	23.6004	23.5874	23.3006	23.418	23.3459	23.3643	23.3975	23.3894	+	+	PE3_PE1;PE7_PE1	29	29	0	2.664	0.000966715	-0.244076	-7.02096	4.27655	0.000223256	-0.215151	-18.2607	P23786	CPT2_HUMAN	CPT2	Carnitine O-palmitoyltransferase 2
25.7948	25.6881	25.6751	25.4572	25.4084	25.4141	25.4922	25.4789	25.4772	+	+	PE3_PE1;PE7_PE1	17	17	0	2.69378	0.00098055	-0.292744	-7.15043	2.4599	0.00253607	-0.236553	-6.18716	P23919	KTHY_HUMAN	DTYMK	Thymidylate kinase
22.2527	22.2156	22.1648	21.2889	21.3311	21.3218	21.2977	21.4134	21.2587	+	+	PE3_PE1;PE7_PE1	28	28	0	5.21702	0	-0.89706	-31.4821	4.12901	0.000329167	-0.887733	-16.7584	P23921	RIR1_HUMAN	RRM1	Ribonucleoside-diphosphate reductase large subunit
21.9474	21.331	21.812	21.1888	21.1337	20.8417	20.4482	21.0683	21.4497	+		PE3_PE1	2	2	0	1.38804	0.0173767	-0.642106	-2.97545	0.956318	0.053068	-0.708091	-2.04288	P24311	COX7B_HUMAN	COX7B	Cytochrome c oxidase subunit 7B
21.9283	21.9041	21.9233	22.5308	22.4939	22.6613	22.5874	22.4331	22.4537	+	+	PE3_PE1;PE7_PE1	12	12	0	3.63344	8.05718e-05	0.643415	12.5415	3.5164	0.000788303	0.572823	11.7065	P24386	RAE1_HUMAN	CHM	Rab proteins geranylgeranyltransferase component A 1
22.9174	23.0152	22.9016	23.4066	23.3988	23.3572	23.2557	23.3847	23.4462	+	+	PE3_PE1;PE7_PE1	4	2	0	3.47764	0.000144775	0.442766	11.4419	2.48431	0.00250067	0.417427	6.28219	P24390	ERD21_HUMAN	KDELR1	ER lumen protein-retaining receptor 1
27.5558	27.5063	27.558	27.4057	27.4505	27.3931	27.306	27.2909	27.3881	+	+	PE3_PE1;PE7_PE1	6	6	0	2.15439	0.00261941	-0.123624	-5.09475	2.4418	0.00267062	-0.211721	-6.11749	P24534	EF1B_HUMAN	EEF1B2	Elongation factor 1-beta
26.1872	26.1846	26.2232	26.2005	26.223	26.1854	26.2818	26.2634	26.3259		+	PE7_PE1	14	14	0	0.0996757	0.89935	0.00460815	0.277816	1.83404	0.00710684	0.0920315	4.11652	P24539	AT5F1_HUMAN	ATP5PB	ATP synthase F(0) complex subunit B1
26.7155	26.6488	26.6881	26.3213	26.2399	26.3494	26.2852	26.3211	26.2416	+	+	PE3_PE1;PE7_PE1	6	6	0	3.24725	0.000329626	-0.380613	-9.9821	3.74186	0.000693536	-0.401496	-13.3657	P24666	PPAC_HUMAN	ACP1	Low molecular weight phosphotyrosine protein phosphatase
26.146	26.1765	26.1882	26.9956	27.0346	27.0562	27.0685	27.1525	27.114	+	+	PE3_PE1;PE7_PE1	26	26	0	5.60867	0	0.858524	39.4676	5.37296	0.000370656	0.941429	34.4483	P24752	THIL_HUMAN	ACAT1	Acetyl-CoA acetyltransferase
22.2864	22.7422	22.8015	23.3259	23.6355	23.4551	22.9397	23.0769	23.1557	+	+	PE3_PE1;PE7_PE1	9	3	0	2.01144	0.00375152	0.862105	4.63917	1.2047	0.0284285	0.447364	2.56335	P24844	MYL9_HUMAN	MYL9	Myosin regulatory light polypeptide 9
20.6502	20.4065	20.9042	20.5746	20.9679	21.0886	20.6348	20.6194	20.6274				5	5	0	0.455571	0.235983	0.223433	1.05658	0.0639824	0.936705	-0.0264384	-0.183934	P24863	CCNC_HUMAN	CCNC	Cyclin-C
18.7788	17.4822	18.5771	18.2808	18.6528	18.4036	18.5886	18.386	18.5963				6	5	0	0.148364	0.839627	0.166339	0.398499	0.234904	0.679603	0.244258	0.597702	P24864	CCNE1_HUMAN	CCNE1	G1/S-specific cyclin-E1
23.1852	23.0954	23.1019	22.9126	22.8962	22.969	22.9671	23.0486	22.9788	+	+	PE3_PE1;PE7_PE1	81	81	0	2.28587	0.00203985	-0.201555	-5.5438	1.54807	0.012449	-0.129346	-3.35983	P24928	RPB1_HUMAN	POLR2A	DNA-directed RNA polymerase II subunit RPB1
22.8149	22.8088	22.8343	22.372	22.3354	22.3278	22.2795	22.3871	22.3136	+	+	PE3_PE1;PE7_PE1	14	12	0	5.15012	0	-0.474263	-30.2887	3.94743	0.000390764	-0.492584	-15.0743	P24941	CDK2_HUMAN	CDK2	Cyclin-dependent kinase 2
23.0507	23.0648	23.0462	22.4979	22.4521	22.4604	22.4702	22.4517	22.477	+	+	PE3_PE1;PE7_PE1	27	19	0	5.56316	0	-0.583774	-38.4449	6.40433	0.00152381	-0.587634	-62.436	P25098	ARBK1_HUMAN	GRK2	Beta-adrenergic receptor kinase 1
25.589	25.6073	25.6346	25.4755	25.5078	25.4773	25.4897	25.5489	25.5424	+	+	PE3_PE1;PE7_PE1	48	48	0	2.72893	0.000906028	-0.123415	-7.30592	1.6544	0.0103425	-0.083306	-3.62993	P25205	MCM3_HUMAN	MCM3	DNA replication licensing factor MCM3
21.7575	21.8775	21.6768	21.3213	21.0843	21.3732	21.3477	21.2876	21.1833	+	+	PE3_PE1;PE7_PE1	2	2	0	2.06487	0.00338046	-0.511023	-4.80567	2.56128	0.00220516	-0.49772	-6.58998	P25208	NFYB_HUMAN	NFYB	Nuclear transcription factor Y subunit beta
21.4145	21.3007	21.203	22.1577	22.0595	22.1058	22.1602	22.237	22.1213	+	+	PE3_PE1;PE7_PE1	13	13	0	3.54409	0.000151961	0.801616	11.8992	3.61359	0.000714483	0.866823	12.396	P25325	THTM_HUMAN	MPST	3-mercaptopyruvate sulfurtransferase
27.7701	27.7069	27.7348	27.5883	27.6589	27.5494	27.6165	27.6122	27.6522	+	+	PE3_PE1;PE7_PE1	8	8	0	1.7005	0.00832445	-0.138442	-3.75099	2.11372	0.0042544	-0.110374	-4.9618	P25398	RS12_HUMAN	RPS12	Small ribosomal subunit protein eS12
21.3409	21.2822	21.2905	21.1956	21.2196	21.1919	21.2703	21.2807	21.1361	+		PE3_PE1	20	20	0	2.13691	0.00265589	-0.102187	-5.03726	0.686332	0.111466	-0.0755234	-1.50857	P25440	BRD2_HUMAN	BRD2	Bromodomain-containing protein 2
19.6983	19.8208	19.663	20.9221	20.8183	20.6642	20.7651	20.6401	20.9055	+	+	PE3_PE1;PE7_PE1	9	9	0	3.5707	0.000154806	1.07421	12.0871	3.49263	0.000851276	1.04292	11.5435	P25445	TNR6_HUMAN	FAS	Tumor necrosis factor receptor superfamily member 6
21.8269	21.6185	21.928	21.6617	21.7182	21.5509	21.5097	21.6556	21.4918		+	PE7_PE1	13	5	0	0.643364	0.121055	-0.147521	-1.42486	1.07013	0.0396606	-0.238751	-2.27679	P25490	TYY1_HUMAN	YY1	Transcriptional repressor protein YY1
24.5648	24.4219	24.4591	25.0171	25.0142	24.9319	24.9963	25.0108	25.0002	+	+	PE3_PE1;PE7_PE1	22	21	0	3.23345	0.000326981	0.505841	9.90048	3.57306	0.000762159	0.520549	12.1039	P25685	DNJB1_HUMAN	DNAJB1	DnaJ homolog subfamily B member 1
22.3725	22.5156	22.3977	22.715	22.775	22.7175	22.8026	22.773	22.8654	+	+	PE3_PE1;PE7_PE1	12	11	0	2.50607	0.00141457	0.30729	6.36792	2.75617	0.00159721	0.38507	7.42848	P25686	DNJB2_HUMAN	DNAJB2	DnaJ homolog subfamily B member 2
28.746	28.6824	28.7216	28.8342	28.9047	28.8551	28.8748	28.9563	28.9221	+	+	PE3_PE1;PE7_PE1	41	41	0	2.21406	0.00240439	0.147975	5.2948	2.58751	0.00216602	0.201027	6.6978	P25705	ATPA_HUMAN	ATP5F1A	ATP synthase subunit alpha
23.8176	23.7778	23.8414	24.525	24.5172	24.4609	24.5389	24.5948	24.5783	+	+	PE3_PE1;PE7_PE1	10	10	0	4.82493	0	0.688759	25.0971	5.16072	0.000266667	0.758392	30.4747	P25774	CATS_HUMAN	CTSS	Cathepsin S
26.3355	26.3786	26.4047	26.4506	26.4941	26.4085	26.3895	26.4589	26.4097	+		PE3_PE1	19	19	0	1.15217	0.0301127	0.0781333	2.45005	0.738171	0.0957028	0.046428	1.60975	P25786	PSA1_HUMAN	PSMA1	Proteasome subunit alpha type-1
25.1479	25.2049	25.1948	25.3424	25.3503	25.3146	25.2168	25.2589	25.2361	+	+	PE3_PE1;PE7_PE1	12	12	0	2.75614	0.000916667	0.15325	7.42829	1.20402	0.0284114	0.0547473	2.56187	P25787	PSA2_HUMAN	PSMA2	Proteasome subunit alpha type-2
25.629	25.6117	25.6014	25.6634	25.6961	25.6613	25.6028	25.5898	25.6541	+		PE3_PE1	13	13	0	1.90002	0.00518957	0.0595551	4.3057	0.0241587	0.976014	0.00153097	0.072223	P25788	PSA3_HUMAN	PSMA3	Proteasome subunit alpha type-3
25.916	25.8661	25.8571	25.9408	25.9516	25.8914	25.8666	25.8306	25.8309				14	14	0	0.859896	0.0640261	0.0481758	1.84949	0.782247	0.0845749	-0.0370509	-1.69613	P25789	PSA4_HUMAN	PSMA4	Proteasome subunit alpha type-4
17.6159	18.1199	16.5843	20.8547	20.7573	20.7798	20.4996	20.8413	20.9867	+	+	PE3_PE1;PE7_PE1	5	5	1	2.75272	0.000914243	3.35722	7.41285	2.6664	0.00181524	3.33587	7.03131	P25942	TNR5_HUMAN	CD40	Tumor necrosis factor receptor superfamily member 5
21.6516	21.6705	21.6017	21.4552	21.3851	21.6254	21.6361	21.7724	21.683	+		PE3_PE1	4	4	0	0.963485	0.0480007	-0.152728	-2.05741	0.550674	0.170883	0.0559012	1.24405	P25963	IKBA_HUMAN	NFKBIA	NF-kappa-B inhibitor alpha
19.6364	19.8403	19.6288	20.6962	20.6232	20.718	20.6712	20.7984	20.683	+	+	PE3_PE1;PE7_PE1	13	13	0	3.69949	8.46416e-05	0.977305	13.0376	3.64836	0.000732155	1.01571	12.652	P26006	ITA3_HUMAN	ITGA3	Integrin alpha-3
22.2387	22.2994	22.2733	24.5821	24.6213	24.5417	24.608	24.6229	24.6278	+	+	PE3_PE1;PE7_PE1	27	26	0	6.83148	0	2.31122	79.8537	7.6309	0	2.34909	126.537	P26010	ITB7_HUMAN	ITGB7	Integrin beta-7
28.1369	28.2091	28.2315	28.2993	28.4273	28.3555	28.126	28.208	28.2189	+		PE3_PE1	39	37	0	1.64219	0.00952721	0.168224	3.59826	0.0699748	0.930114	-0.00818443	-0.200068	P26038	MOES_HUMAN	MSN	Moesin
24.8707	24.8769	24.9068	24.9639	25.0641	25.0007	24.9534	25.0841	25.0283	+	+	PE3_PE1;PE7_PE1	23	23	0	1.78716	0.00666311	0.124743	3.98562	1.5942	0.0115355	0.137142	3.47548	P26196	DDX6_HUMAN	DDX6	Probable ATP-dependent RNA helicase DDX6
23.4829	23.4807	23.5267	23.2349	23.2596	23.3032	23.3203	23.3416	23.357	+	+	PE3_PE1;PE7_PE1	65	65	0	3.1179	0.00034653	-0.230845	-9.24104	2.98657	0.00133096	-0.157122	-8.54101	P26358	DNMT1_HUMAN	DNMT1	DNA (cytosine-5)-methyltransferase 1
25.7493	25.7221	25.7519	25.7788	25.795	25.7833	25.7075	25.7321	25.7584	+		PE3_PE1	15	15	0	1.85295	0.00566758	0.0445925	4.17013	0.183971	0.780969	-0.00845337	-0.48248	P26368	U2AF2_HUMAN	U2AF2	Splicing factor U2AF 65 kDa subunit
27.7377	27.8022	27.8534	27.8415	27.8456	27.809	27.6989	27.7135	27.732		+	PE7_PE1	14	14	0	0.410692	0.283856	0.0342452	0.966725	1.12163	0.0350188	-0.0830339	-2.38505	P26373	RL13_HUMAN	RPL13	Large ribosomal subunit protein eL13
21.3533	21.3917	21.3421	20.8124	20.8318	20.8144	20.8854	20.893	20.8901	+	+	PE3_PE1;PE7_PE1	20	15	0	5.32252	0	-0.54285	-33.4597	5.19983	0.000284866	-0.472853	-31.1711	P26374	RAE2_HUMAN	CHML	Rab proteins geranylgeranyltransferase component A 2
23.8348	23.7959	23.7727	24.0788	24.1199	24.1182	24.1178	24.1738	24.1578	+	+	PE3_PE1;PE7_PE1	18	18	0	3.75945	8.82562e-05	0.304494	13.5043	3.84214	0.000361842	0.348627	14.1744	P26572	MGAT1_HUMAN	MGAT1	Alpha-1
27.496	27.4764	27.4467	27.5613	27.6627	27.5642	27.6337	27.673	27.6682	+	+	PE3_PE1;PE7_PE1	13	11	0	1.56161	0.0115207	0.123037	3.39354	3.2157	0.00099177	0.185284	9.79642	P26583	HMGB2_HUMAN	HMGB2	High mobility group protein B2
27.0019	26.9921	27.0221	26.7618	26.7364	26.7186	26.7237	26.8099	26.8042	+	+	PE3_PE1;PE7_PE1	16	13	0	4.19179	0	-0.266466	-17.3822	2.82536	0.00154267	-0.226116	-7.74801	P26599	PTBP1_HUMAN	PTBP1	Polypyrimidine tract-binding protein 1
26.141	26.1135	26.1154	25.8206	25.8804	25.8169	25.9068	25.9202	25.9195	+	+	PE3_PE1;PE7_PE1	39	35	0	3.65221	8.16864e-05	-0.284011	-12.6807	4.51896	0.000139535	-0.207813	-21.0207	P26639	SYTC_HUMAN	TARS1	Threonine--tRNA ligase 1
25.8459	25.807	25.8229	25.8316	25.874	25.8578	25.8484	25.8719	25.8448		+	PE7_PE1	61	61	0	0.806325	0.0739715	0.0292002	1.7435	0.984545	0.0491607	0.0297337	2.10026	P26640	SYVC_HUMAN	VARS1	Valine--tRNA ligase
27.7353	27.6586	27.6912	27.4436	27.4747	27.4824	27.4591	27.4943	27.4979	+	+	PE3_PE1;PE7_PE1	24	24	0	3.08397	0.000398537	-0.228139	-9.05532	2.93976	0.00134368	-0.211299	-8.3035	P26641	EF1G_HUMAN	EEF1G	Elongation factor 1-gamma
18.4409	16.8097	15.4523	16.2559	15.476	15.4179	15.4633	16.0536	16.5954				2	2	1	0.583612	0.147679	-1.18439	-1.30842	0.394912	0.309629	-0.863532	-0.934832	P26651	TTP_HUMAN	ZFP36	mRNA decay activator protein ZFP36
25.6072	25.5633	25.7078	25.528	25.5657	25.4112	25.3121	25.3463	25.4501		+	PE7_PE1	8	8	0	0.920319	0.0542212	-0.124497	-1.97023	1.89978	0.00615353	-0.25659	-4.305	P26885	FKBP2_HUMAN	FKBP2	Peptidyl-prolyl cis-trans isomerase FKBP2
23.3067	23.5423	23.4896	23.1373	23.2061	23.1821	23.1075	23.1926	23.167	+	+	PE3_PE1;PE7_PE1	10	10	0	1.66353	0.00914839	-0.271051	-3.6537	1.7325	0.00862086	-0.290485	-3.83654	P27105	STOM_HUMAN	STOM	Stomatin
22.2603	21.887	22.0532	21.3734	21.7642	22.1368	21.3957	21.1962	21.1471		+	PE7_PE1	3	3	0	0.557617	0.161017	-0.308683	-1.25764	2.46666	0.0024691	-0.82049	-6.21335	P27144	KAD4_HUMAN	AK4	Adenylate kinase 4
26.981	26.9801	26.9439	26.6067	26.6669	26.6633	26.7229	26.7465	26.7152	+	+	PE3_PE1;PE7_PE1	10	10	0	3.82349	9.30233e-05	-0.322751	-14.0205	4.00331	0.000411215	-0.240149	-15.5742	P27348	1433T_HUMAN	YWHAQ	14-3-3 protein theta
22.8376	22.7965	22.8457	22.9207	22.9288	22.8406	22.861	22.9744	22.9308	+	+	PE3_PE1;PE7_PE1	16	16	0	1.02832	0.041208	0.0700874	2.19005	1.23379	0.0266479	0.0954787	2.62694	P27361	MK03_HUMAN	MAPK3	Mitogen-activated protein kinase 3
20.0141	20.169	20.0359	20.1601	20.3075	20.224	20.2848	20.3333	20.1189	+	+	PE3_PE1;PE7_PE1	19	16	0	1.14782	0.030482	0.157521	2.44074	0.99994	0.0471961	0.172632	2.13172	P27448	MARK3_HUMAN	MARK3	MAP/microtubule affinity-regulating kinase 3
20.9973	21.0385	21.0676	21.3548	21.374	21.3739	21.2956	21.4424	21.5539	+	+	PE3_PE1;PE7_PE1	17	17	0	4.00552	0	0.33312	15.5942	2.15914	0.00403591	0.396191	5.11043	P27540	ARNT_HUMAN	ARNT	Aryl hydrocarbon receptor nuclear translocator
26.2675	26.4077	26.4486	26.4121	26.5379	26.5021	26.3607	26.4161	26.4238				8	4	0	0.757541	0.0857417	0.109391	1.64766	0.1652	0.80903	0.0255871	0.438605	P27635	RL10_HUMAN	RPL10	Large ribosomal subunit protein uL16
28.849	28.9183	28.9182	28.3613	28.3911	28.3499	28.2971	28.3314	28.2769	+	+	PE3_PE1;PE7_PE1	30	30	0	4.44826	0	-0.527719	-20.1759	4.52993	0.000141593	-0.593363	-21.1548	P27694	RFA1_HUMAN	RPA1	Replication protein A 70 kDa DNA-binding subunit
25.0942	25.1052	25.0925	25.4112	25.466	25.4186	25.4694	25.451	25.4654	+	+	PE3_PE1;PE7_PE1	20	20	0	4.34344	0	0.334641	18.9846	6.12104	0.001	0.364632	53.0323	P27695	APEX1_HUMAN	APEX1	DNA repair nuclease/redox regulator APEX1
24.1646	24.0459	24.1239	23.7921	23.8099	23.7381	23.812	23.8018	23.8363	+	+	PE3_PE1;PE7_PE1	16	16	0	2.8973	0.000587276	-0.331429	-8.09327	2.90375	0.00131255	-0.294749	-8.12489	P27707	DCK_HUMAN	DCK	Deoxycytidine kinase
23.9604	23.9356	23.9305	24.1661	24.1974	24.1369	24.1674	24.171	24.1822	+	+	PE3_PE1;PE7_PE1	82	79	0	3.46607	0.000143685	0.224613	11.364	4.64119	0.000156607	0.231314	22.5642	P27708	PYR1_HUMAN	CAD	Multifunctional protein CAD
28.8056	28.796	28.8515	29.7543	29.8006	29.7622	29.8044	29.881	29.8382	+	+	PE3_PE1;PE7_PE1	32	32	0	5.7502	0	0.954641	42.8246	5.47604	0.000417391	1.02346	36.5602	P27797	CALR_HUMAN	CALR	Calreticulin
16.2999	17.0425	16.2549	15.2719	15.1069	15.1727	15.3394	15.4802	16.1752	+	+	PE3_PE1;PE7_PE1	4	3	0	2.18306	0.00250384	-1.34861	-5.19011	1.12302	0.0349902	-0.867483	-2.38799	P27815	PDE4A_HUMAN	PDE4A	3'
23.9986	24.0336	24.0156	24.35	24.3798	24.361	24.3305	24.3741	24.383	+	+	PE3_PE1;PE7_PE1	58	58	0	4.89006	0	0.347656	26.061	4.26538	0.000220436	0.3466	18.1424	P27816	MAP4_HUMAN	MAP4	Microtubule-associated protein 4
29.3043	29.3154	29.325	29.7233	29.7193	29.6676	29.7217	29.7419	29.7704	+	+	PE3_PE1;PE7_PE1	49	48	0	4.4808	0	0.388497	20.5605	5.0156	0.00023301	0.429775	28.0233	P27824	CALX_HUMAN	CANX	Calnexin
23.3994	23.2292	23.3087	23.4054	23.3612	23.4712	23.3238	23.3208	23.3348				23	19	0	0.788122	0.0781875	0.100165	1.70767	0.102456	0.892762	0.0140635	0.28492	P27986	P85A_HUMAN	PIK3R1	Phosphatidylinositol 3-kinase regulatory subunit alpha
23.4342	23.0974	23.25	23.0697	23.0204	22.9033	23.0824	23.0435	22.9964	+	+	PE3_PE1;PE7_PE1	25	24	0	1.13181	0.0318632	-0.262721	-2.40664	1.02674	0.0440394	-0.219746	-2.18678	P27987	IP3KB_HUMAN	ITPKB	Inositol-trisphosphate 3-kinase B
25.9269	25.8283	25.8187	25.6884	25.6728	25.6819	25.6732	25.6902	25.6215	+	+	PE3_PE1;PE7_PE1	14	14	0	2.14866	0.00264462	-0.176956	-5.07583	2.08725	0.00440706	-0.196381	-4.87673	P28062	PSB8_HUMAN	PSMB8	Proteasome subunit beta type-8
25.1903	25.1909	25.2109	25.2357	25.3137	25.2274	25.1646	25.1726	25.1775	+	+	PE3_PE1;PE7_PE1	9	9	0	1.02085	0.041785	0.0615826	2.17466	1.53597	0.0127483	-0.0258007	-3.32986	P28065	PSB9_HUMAN	PSMB9	Proteasome subunit beta type-9
25.9886	26.0414	26.0355	26.1886	26.1773	26.2081	26.028	26.1004	26.0755	+		PE3_PE1	12	12	0	3.06188	0.000390506	0.169497	8.93622	0.787769	0.0834879	0.0461235	1.70698	P28066	PSA5_HUMAN	PSMA5	Proteasome subunit alpha type-5
25.7259	25.8006	25.6711	25.7691	25.7581	25.7861	25.731	25.7368	25.7145				9	9	0	0.429544	0.263215	0.0385844	1.00461	0.0458601	0.95745	-0.00511297	-0.134117	P28070	PSB4_HUMAN	PSMB4	Proteasome subunit beta type-4
24.81	24.7415	24.7457	24.6506	24.6667	24.5625	24.6424	24.7194	24.6646	+	+	PE3_PE1;PE7_PE1	6	6	0	1.62137	0.00995144	-0.139113	-3.54466	1.32579	0.0211153	-0.0902818	-2.83241	P28072	PSB6_HUMAN	PSMB6	Proteasome subunit beta type-6
22.9566	22.9848	22.9879	23.4193	23.4222	23.3988	23.4849	23.5233	23.4899	+	+	PE3_PE1;PE7_PE1	9	9	0	5.41373	0	0.436954	35.2688	5.322	0.00034657	0.522889	33.4498	P28074	PSB5_HUMAN	PSMB5	Proteasome subunit beta type-5
22.1546	22.0596	22.0675	23.5017	23.4683	23.4571	23.2941	23.3155	23.3633	+	+	PE3_PE1;PE7_PE1	17	10	0	5.69765	0	1.38179	41.5462	5.32662	0.000349091	1.2304	33.5391	P28161	GSTM2_HUMAN	GSTM2	Glutathione S-transferase Mu 2
21.302	21.1617	21.0661	21.0616	21.0753	21.1605	21.2472	21.2227	21.2635				15	15	0	0.442699	0.248523	-0.0774841	-1.03092	0.415331	0.283071	0.0678552	0.976069	P28288	ABCD3_HUMAN	ABCD3	ATP-binding cassette sub-family D member 3
14.7378	13.25	14.4854	14.5177	14.5974	14.3934	14.6874	14.4511	17.8337				8	8	1	0.30284	0.491212	0.345099	0.744526	0.562613	0.164079	1.49963	1.26741	P28290	ITPI2_HUMAN	ITPRID2	Protein ITPRID2
20.5434	20.4638	20.3432	20.3439	20.447	20.5286	20.3509	20.5641	20.5735				7	7	0	0.0444872	0.958652	-0.0102908	-0.130277	0.189279	0.771679	0.0460567	0.494738	P28328	PEX2_HUMAN	PEX2	Peroxisome biogenesis factor 2
24.6163	24.6609	24.6851	23.4446	23.4519	23.4065	23.3337	23.4	23.4208	+	+	PE3_PE1;PE7_PE1	38	38	0	6.00576	0	-1.21976	-49.6232	5.55856	0.000470588	-1.26928	-38.343	P28331	NDUS1_HUMAN	NDUFS1	NADH-ubiquinone oxidoreductase 75 kDa subunit
25.5196	25.5557	25.5085	25.7205	25.6975	25.6232	25.7922	25.7599	25.7721	+	+	PE3_PE1;PE7_PE1	51	51	0	2.02162	0.00364775	0.152461	4.67056	3.8762	0.000369748	0.246828	14.4596	P28340	DPOD1_HUMAN	POLD1	DNA polymerase delta catalytic subunit
20.5099	20.6907	20.6301	20.3422	20.4281	20.4486	20.3177	20.213	20.2329	+	+	PE3_PE1;PE7_PE1	7	3	0	1.51211	0.0131904	-0.203934	-3.27125	2.33761	0.00314161	-0.355721	-5.72903	P28347	TEAD1_HUMAN	TEAD1	Transcriptional enhancer factor TEF-1
23.8976	23.8593	23.8275	23.9453	23.9252	23.9157	23.9275	23.9756	23.9471	+	+	PE3_PE1;PE7_PE1	24	18	0	1.4207	0.0162878	0.0672874	3.05191	1.64441	0.0105582	0.0886167	3.60401	P28482	MK01_HUMAN	MAPK1	Mitogen-activated protein kinase 1
23.3714	23.4684	23.5538	23.1409	23.1386	23.1444	23.016	23.1348	23.1332	+	+	PE3_PE1;PE7_PE1	8	8	0	2.44539	0.00151463	-0.323208	-6.13124	2.30863	0.00320296	-0.36986	-5.62467	P28676	GRAN_HUMAN	GCA	Grancalcin
25.6778	25.5827	25.6381	25.3859	25.3554	25.3829	25.2361	25.4302	25.3072	+	+	PE3_PE1;PE7_PE1	17	9	0	3.04149	0.000386354	-0.258139	-8.82759	2.09176	0.00441697	-0.308334	-4.89114	P28702	RXRB_HUMAN	RXRB	Retinoic acid receptor RXR-beta
17.8356	18.3064	17.6948	17.6103	17.9006	18.0634	18.3738	18.593	17.7085				10	10	0	0.142536	0.847219	-0.0874602	-0.384438	0.359717	0.36535	0.279538	0.863019	P28715	ERCC5_HUMAN	ERCC5	DNA excision repair protein ERCC-5
22.6877	22.6978	22.7482	22.5913	22.5718	22.6811	22.5735	22.7236	22.7168	+		PE3_PE1	21	21	0	1.17846	0.0281635	-0.0964966	-2.50651	0.310985	0.469098	-0.0399151	-0.761709	P28799	GRN_HUMAN	GRN	Progranulin
26.2784	26.2888	26.2718	26.1098	26.1293	26.063	26.0321	26.0553	26.0882	+	+	PE3_PE1;PE7_PE1	34	34	0	3.04145	0.000386182	-0.178937	-8.82739	3.69597	0.000667643	-0.221115	-13.0107	P28838	AMPL_HUMAN	LAP3	Cytosol aminopeptidase
23.0381	22.9716	22.9866	22.8195	22.8753	22.7175	22.7111	22.9172	22.8533	+	+	PE3_PE1;PE7_PE1	15	15	0	1.74141	0.00746317	-0.194669	-3.8606	1.25543	0.0253812	-0.171605	-2.67467	P29083	T2EA_HUMAN	GTF2E1	General transcription factor IIE subunit 1
21.9646	21.943	21.9264	21.4404	21.5927	21.4329	21.4371	21.1958	21.417	+	+	PE3_PE1;PE7_PE1	13	13	0	2.99225	0.000414739	-0.456016	-8.57027	2.79692	0.00159746	-0.594728	-7.61518	P29084	T2EB_HUMAN	GTF2E2	Transcription initiation factor IIE subunit beta
25.0753	25.0286	25.066	25.0531	25.0781	25.0263	25.0096	25.0239	25.0301		+	PE7_PE1	62	62	0	0.0696638	0.932704	-0.00412178	-0.199234	1.07334	0.0393069	-0.0354385	-2.28349	P29144	TPP2_HUMAN	TPP2	Tripeptidyl-peptidase 2
23.4113	23.2812	23.3583	22.8626	22.9209	22.7548	22.9152	22.882	22.8657	+	+	PE3_PE1;PE7_PE1	13	13	0	2.91633	0.000488688	-0.504164	-8.18689	3.47576	0.000843403	-0.462669	-11.4292	P29218	IMPA1_HUMAN	IMPA1	Inositol monophosphatase 1
17.2308	17.1549	17.0547	17.4724	17.4689	17.5857	17.5237	17.3225	17.1663	+		PE3_PE1	5	5	0	2.32242	0.00196984	0.362175	5.67413	0.760146	0.0902097	0.190661	1.65277	P29279	CCN2_HUMAN	CCN2	CCN family member 2
24.2648	24.2075	24.2164	24.3548	24.3648	24.36	24.2732	24.2976	24.2987	+	+	PE3_PE1;PE7_PE1	38	38	0	2.71232	0.000897293	0.130273	7.23205	1.42916	0.0165409	0.0602875	3.07185	P29350	PTN6_HUMAN	PTPN6	Tyrosine-protein phosphatase non-receptor type 6
22.6005	22.5483	22.4065	22.4195	22.5125	22.4108	22.4098	22.3973	22.4423				18	16	0	0.460192	0.231564	-0.0708593	-1.06577	0.791351	0.0827983	-0.101978	-1.71402	P29353	SHC1_HUMAN	SHC1	SHC-transforming protein 1
22.9071	22.7053	22.8988	21.4861	21.4672	21.3869	21.4802	21.4037	21.39	+	+	PE3_PE1;PE7_PE1	11	11	0	4.35805	0	-1.3903	-19.1464	4.40806	0.000249027	-1.41245	-19.7106	P29372	3MG_HUMAN	MPG	DNA-3-methyladenine glycosylase
17.4954	17.8347	17.5357	17.1891	17.5909	17.6955	17.7193	17.3335	17.52				10	10	0	0.278589	0.563163	-0.130124	-0.692872	0.250706	0.639676	-0.0976925	-0.632473	P29374	ARI4A_HUMAN	ARID4A	AT-rich interactive domain-containing protein 4A
19.8306	19.8992	19.8098	19.4981	19.3364	19.3155	19.2928	19.6176	19.2239	+	+	PE3_PE1;PE7_PE1	27	26	0	2.72148	0.000901639	-0.463217	-7.27268	1.70635	0.009281	-0.468433	-3.76655	P29375	KDM5A_HUMAN	KDM5A	Lysine-specific demethylase 5A
26.6867	26.7136	26.7355	26.9006	26.8891	26.8726	26.8463	26.8381	26.858	+	+	PE3_PE1;PE7_PE1	34	34	0	3.37524	0.000187568	0.175484	10.7698	3.05067	0.00115061	0.135519	8.87638	P29401	TKT_HUMAN	TKT	Transketolase
23.2453	23.2122	23.3037	23.6159	23.6858	23.6174	23.5605	23.642	23.6685	+	+	PE3_PE1;PE7_PE1	17	15	0	3.40047	0.000137931	0.385968	10.9318	3.0335	0.00128281	0.369932	8.78536	P29466	CASP1_HUMAN	CASP1	Caspase-1
19.4746	19.4953	19.937	16.3154	16.1576	17.5142	17.2397	18.5821	16.6746	+	+	PE3_PE1;PE7_PE1	3	1	1	2.55082	0.00127951	-2.97319	-6.5474	1.66208	0.0102165	-2.13683	-3.64991	P29558	RBMS1_HUMAN	RBMS1	RNA-binding motif
23.0004	22.923	22.9633	23.4294	23.5236	23.4227	23.472	23.4624	23.4469	+	+	PE3_PE1;PE7_PE1	40	40	0	3.63687	8.07818e-05	0.496323	12.5669	4.53268	0.000142222	0.498185	21.1886	P29590	PML_HUMAN	PML	Protein PML
21.7612	21.5871	21.6743	22.5622	22.6113	22.5746	22.6176	22.5111	22.4861	+	+	PE3_PE1;PE7_PE1	33	33	0	4.18797	0	0.908517	17.3436	3.74743	0.000699387	0.864115	13.4095	P29597	TYK2_HUMAN	TYK2	Non-receptor tyrosine-protein kinase TYK2
27.378	27.4002	27.4262	27.3826	27.4087	27.3514	27.2729	27.3183	27.3402		+	PE7_PE1	19	16	0	0.403017	0.293464	-0.0205917	-0.951234	1.70184	0.00952189	-0.0909901	-3.75457	P29692	EF1D_HUMAN	EEF1D	Elongation factor 1-delta
24.8091	24.7288	24.7402	24.8526	24.8403	24.8376	24.7784	24.8328	24.7941	+		PE3_PE1	29	29	0	1.52442	0.0127896	0.0841446	3.3014	0.641965	0.126295	0.0424099	1.42214	P29728	OAS2_HUMAN	OAS2	2'-5'-oligoadenylate synthase 2
25.1761	25.0741	25.0688	23.8477	23.8856	23.8642	23.829	23.8554	23.8993	+	+	PE3_PE1;PE7_PE1	11	11	0	5.34447	0	-1.2405	-33.8865	5.17583	0.000271955	-1.24509	-30.7418	P29966	MARCS_HUMAN	MARCKS	Myristoylated alanine-rich C-kinase substrate
22.95	22.7444	22.8877	23.5421	23.5405	23.627	23.6663	23.7131	23.6541	+	+	PE3_PE1;PE7_PE1	20	20	0	3.33948	0.000183369	0.709189	10.5441	3.67764	0.000659913	0.817152	12.8715	P30038	AL4A1_HUMAN	ALDH4A1	Delta-1-pyrroline-5-carboxylate dehydrogenase
27.2539	27.3397	27.28	27.185	27.2044	27.1943	27.1799	27.2226	27.1711	+	+	PE3_PE1;PE7_PE1	15	15	0	1.68746	0.00861631	-0.0966447	-3.71651	1.53924	0.0126822	-0.100005	-3.33795	P30040	ERP29_HUMAN	ERP29	Endoplasmic reticulum resident protein 29
27.4662	27.4505	27.4074	27.5523	27.6113	27.4972	27.4675	27.5158	27.5094	+	+	PE3_PE1;PE7_PE1	17	17	0	1.40178	0.0168836	0.112244	3.0075	1.13939	0.0336315	0.0561962	2.42277	P30041	PRDX6_HUMAN	PRDX6	Peroxiredoxin-6
26.1599	26.1105	26.1371	26.0823	26.033	26.102	26.0622	26.226	26.1693	+		PE3_PE1	10	10	0	1.19181	0.0273414	-0.0633856	-2.53536	0.121554	0.869995	0.0166849	0.332983	P30043	BLVRB_HUMAN	BLVRB	Flavin reductase (NADPH)
27.6511	27.6575	27.6077	27.3961	27.4335	27.3887	27.3651	27.4221	27.4143	+	+	PE3_PE1;PE7_PE1	11	11	0	3.43109	0.000140669	-0.232643	-11.1316	3.25782	0.000952381	-0.238258	-10.0451	P30044	PRDX5_HUMAN	PRDX5	Peroxiredoxin-5
24.9455	24.8959	24.8321	25.2153	25.3193	25.2752	25.3304	25.3007	25.3664	+	+	PE3_PE1;PE7_PE1	7	1	0	2.97836	0.000506178	0.378784	8.4989	3.50606	0.000781841	0.441334	11.6354	P30046	DOPD_HUMAN	DDT	D-dopachrome decarboxylase
16.6001	16.5401	16.4845	16.97	17.1433	17.221	16.9487	16.9432	16.812	+	+	PE3_PE1;PE7_PE1	1	1	0	2.66068	0.000964621	0.569901	7.00665	2.52658	0.00231096	0.359754	6.44966	P30047	GFRP_HUMAN	GCHFR	GTP cyclohydrolase 1 feedback regulatory protein
26.8533	26.8814	26.8894	26.9088	26.9172	26.9016	26.9396	26.944	26.9511	+	+	PE3_PE1;PE7_PE1	9	9	0	1.36481	0.0179661	0.0345236	2.92168	2.44783	0.00260422	0.0702044	6.14062	P30048	PRDX3_HUMAN	PRDX3	Thioredoxin-dependent peroxide reductase
26.9849	26.9717	26.9925	27.1573	27.1291	27.1572	27.196	27.2164	27.2183	+	+	PE3_PE1;PE7_PE1	4	4	0	3.90646	0	0.164836	14.7177	4.76371	0.000177449	0.227207	24.2235	P30049	ATPD_HUMAN	ATP5F1D	ATP synthase subunit delta
27.7032	27.699	27.6574	27.431	27.4565	27.432	27.5265	27.5042	27.4714	+	+	PE3_PE1;PE7_PE1	9	9	0	3.89971	0	-0.246672	-14.6598	2.99337	0.0013399	-0.185864	-8.57606	P30050	RL12_HUMAN	RPL12	Large ribosomal subunit protein uL11
25.4237	25.4252	25.4266	25.4252	25.3871	25.4181	25.4736	25.4606	25.4466		+	PE7_PE1	16	16	0	0.572767	0.152872	-0.015089	-1.28725	1.95193	0.0055138	0.0350666	4.45884	P30084	ECHM_HUMAN	ECHS1	Enoyl-CoA hydratase
25.2264	25.2003	25.2712	25.5926	25.6112	25.5835	25.6361	25.7061	25.6101	+	+	PE3_PE1;PE7_PE1	16	16	0	4.08311	0	0.363141	16.3161	3.53373	0.0008	0.418125	11.8267	P30085	KCY_HUMAN	CMPK1	UMP-CMP kinase
26.9487	26.8526	26.8597	27.2318	27.2298	27.232	27.2255	27.2046	27.2186	+	+	PE3_PE1;PE7_PE1	12	12	0	3.43134	0.000140749	0.344211	11.1333	3.32368	0.000862486	0.329221	10.4457	P30086	PEBP1_HUMAN	PEBP1	Phosphatidylethanolamine-binding protein 1
26.8038	26.8312	26.8355	25.8152	25.8484	25.806	25.767	25.7953	25.8119	+	+	PE3_PE1;PE7_PE1	37	37	0	6.37885	0	-1.00031	-61.5262	6.41413	0.00157377	-1.0321	-62.7894	P30101	PDIA3_HUMAN	PDIA3	Protein disulfide-isomerase A3
25.5101	25.5196	25.5381	25.4318	25.4532	25.4405	25.346	25.4162	25.4335	+	+	PE3_PE1;PE7_PE1	34	25	0	2.84487	0.000698211	-0.0807667	-7.84029	1.94338	0.0057327	-0.124018	-4.43333	P30153	2AAA_HUMAN	PPP2R1A	Serine/threonine-protein phosphatase 2A 65 kDa regulatory subunit A alpha isoform
22.8397	22.7726	22.8707	22.999	23.0244	23.0049	22.8705	22.9925	22.9849	+	+	PE3_PE1;PE7_PE1	19	19	0	2.42881	0.00153365	0.181768	6.06789	1.16921	0.03113	0.121691	2.48658	P30154	2AAB_HUMAN	PPP2R1B	Serine/threonine-protein phosphatase 2A 65 kDa regulatory subunit A beta isoform
21.7639	21.6864	21.7153	21.8937	21.9935	21.8921	21.9917	22.0834	22.0556	+	+	PE3_PE1;PE7_PE1	22	22	0	2.14296	0.0026387	0.204575	5.05709	3.09245	0.00118383	0.321675	9.10137	P30260	CDC27_HUMAN	CDC27	Cell division cycle protein 27 homolog
20.0448	19.8106	19.8847	19.6642	19.6326	19.7107	19.4444	19.7553	19.7652	+		PE3_PE1	14	14	0	1.5471	0.0120503	-0.244172	-3.35741	0.960526	0.0523924	-0.258406	-2.05141	P30291	WEE1_HUMAN	WEE1	Wee1-like protein kinase
18.9373	18.7683	18.9839	18.7217	19.187	19.0697	19.1078	19.3932	19.1524		+	PE7_PE1	10	9	0	0.246822	0.65416	0.096288	0.623965	1.36193	0.0193531	0.321305	2.91506	P30305	MPIP2_HUMAN	CDC25B	M-phase inducer phosphatase 2
24.6396	24.6784	24.655	25.1021	25.2602	25.1055	25.2144	25.1827	25.2424	+	+	PE3_PE1;PE7_PE1	9	9	0	3.13586	0.000306679	0.498255	9.34082	4.94778	0.000214765	0.555514	26.9456	P30405	PPIF_HUMAN	PPIF	Peptidyl-prolyl cis-trans isomerase F
20.6358	20.4425	20.2211	20.7248	20.6768	20.7258	20.6118	20.736	20.7387	+		PE3_PE1	24	24	0	1.07323	0.0370164	0.276012	2.28326	0.968458	0.0513865	0.262372	2.06751	P30414	NKTR_HUMAN	NKTR	NK-tumor recognition protein
24.9028	24.7986	24.8537	24.6949	24.6913	24.6921	24.6999	24.7188	24.6916	+	+	PE3_PE1;PE7_PE1	22	17	0	2.2092	0.00246083	-0.158901	-5.27828	2.05065	0.0046755	-0.148263	-4.76093	P30419	NMT1_HUMAN	NMT1	Glycylpeptide N-tetradecanoyltransferase 1
19.8415	19.4231	19.8155	19.3986	20.0525	19.7095	19.5021	20.0116	19.8243				8	8	0	0.0391833	0.962744	0.0268014	0.115349	0.16038	0.81663	0.0859222	0.427199	P30511	HLAF_HUMAN	HLA-F	HLA class I histocompatibility antigen
22.4282	22.5833	22.523	22.3703	22.477	22.4129	22.3637	22.4675	22.4809				12	12	0	0.76883	0.0830108	-0.0914319	-1.66979	0.563889	0.163521	-0.0741393	-1.2699	P30519	HMOX2_HUMAN	HMOX2	Heme oxygenase 2
24.9158	24.8523	24.874	24.7049	24.6508	24.6711	24.5527	24.6218	24.5737	+	+	PE3_PE1;PE7_PE1	20	18	0	2.95709	0.000500632	-0.2051	-8.39072	3.37467	0.000894467	-0.297969	-10.7662	P30520	PURA2_HUMAN	ADSS2	Adenylosuccinate synthetase isozyme 2
22.375	22.3355	22.3602	24.3062	24.35	24.2984	24.2796	24.3095	24.2954	+	+	PE3_PE1;PE7_PE1	24	24	0	7.20934	0	1.96129	99.2656	7.73787	0	1.93792	134.575	P30533	AMRP_HUMAN	LRPAP1	Alpha-2-macroglobulin receptor-associated protein
23.4625	23.4441	23.3052	23.2022	23.2406	23.2182	23.1356	23.2363	23.1558	+	+	PE3_PE1;PE7_PE1	17	17	0	1.64598	0.00943524	-0.183614	-3.60807	1.7577	0.00820809	-0.228065	-3.90482	P30566	PUR8_HUMAN	ADSL	Adenylosuccinate lyase
23.8567	23.7492	23.8426	23.8969	23.8031	23.8626	23.8254	23.835	23.6795				58	52	0	0.365443	0.35106	0.0380135	0.874772	0.234944	0.679668	-0.0362047	-0.597791	P30622	CLIP1_HUMAN	CLIP1	CAP-Gly domain-containing linker protein 1
23.8073	23.8939	23.9152	24.4752	24.4899	24.4202	24.5368	24.5136	24.5298	+	+	PE3_PE1;PE7_PE1	12	12	0	3.94229	0	0.589622	15.0291	4.38251	0.000245211	0.654586	19.4202	P30626	SORCN_HUMAN	SRI	Sorcin
21.3302	21.4558	21.3975	22.2963	22.2054	22.1789	22.3	22.2522	22.4186	+	+	PE3_PE1;PE7_PE1	8	7	0	4.09049	0	0.832412	16.3864	3.95533	0.000394619	0.929113	15.144	P30711	GSTT1_HUMAN	GSTT1	Glutathione S-transferase theta-1
25.2568	25.2253	25.2683	23.319	23.246	23.2669	23.1659	23.148	23.1483	+	+	PE3_PE1;PE7_PE1	20	19	0	6.79526	0	-1.97284	-78.2049	7.90174	0	-2.09607	-147.89	P30740	ILEU_HUMAN	SERPINB1	Leukocyte elastase inhibitor
21.3314	21.3917	21.5607	21.0464	21.1777	20.8908	21.2634	21.075	21.0918	+	+	PE3_PE1;PE7_PE1	6	5	0	1.65023	0.00942562	-0.389608	-3.61909	1.44767	0.0157571	-0.284505	-3.11577	P30825	CTR1_HUMAN	SLC7A1	High affinity cationic amino acid transporter 1
22.8262	22.8611	22.8311	24.1253	24.1324	24.0332	24.1188	24.1636	24.1021	+	+	PE3_PE1;PE7_PE1	24	20	0	5.50862	0	1.25753	37.2538	6.34588	0.0013913	1.28872	60.3682	P30837	AL1B1_HUMAN	ALDH1B1	Aldehyde dehydrogenase X
23.4158	23.3708	23.4064	23.0707	23.0865	23.0829	23.1468	23.1656	23.1517	+	+	PE3_PE1;PE7_PE1	58	58	0	4.58985	0	-0.317589	-21.9027	4.09315	0.000317907	-0.242916	-16.4118	P30876	RPB2_HUMAN	POLR2B	DNA-directed RNA polymerase II subunit RPB2
25.5732	25.5799	25.6075	25.5107	25.5526	25.5253	25.6099	25.6575	25.61	+		PE3_PE1	30	30	0	1.62255	0.00992781	-0.0573285	-3.54768	0.957402	0.0528767	0.0388978	2.04507	P31040	SDHA_HUMAN	SDHA	Succinate dehydrogenase [ubiquinone] flavoprotein subunit
28.0581	28.0586	28.0509	27.4585	27.4728	27.4719	27.5368	27.5776	27.5747	+	+	PE3_PE1;PE7_PE1	27	25	0	7.42014	0	-0.588093	-112.077	5.48866	0.000426667	-0.492841	-36.8273	P31146	COR1A_HUMAN	CORO1A	Coronin-1A
24.6481	24.5964	24.6431	25.127	25.2213	25.1367	25.0941	25.1398	25.0147	+	+	PE3_PE1;PE7_PE1	18	18	0	4.004	0	0.532488	15.5804	3.45836	0.000829594	0.453698	11.3124	P31150	GDIA_HUMAN	GDI1	Rab GDP dissociation inhibitor alpha
20.7698	20.3985	20.7022	21.4278	20.9954	20.8156	16.528	21.1771	20.9739	+		PE3_PE1	1	0	1	0.99704	0.0441857	0.456119	2.12579	0.281589	0.552199	-1.06382	-0.699305	P31152	MK04_HUMAN	MAPK4	Mitogen-activated protein kinase 4
26.0086	25.9052	25.9799	25.8769	25.9096	25.8505	25.8462	25.9302	25.8311	+	+	PE3_PE1;PE7_PE1	18	15	0	1.14271	0.0310882	-0.0856024	-2.42984	1.02855	0.0438483	-0.095417	-2.19053	P31153	METK2_HUMAN	MAT2A	S-adenosylmethionine synthase isoform type-2
20.1859	19.767	20.0762	21.4023	21.586	21.354	21.401	21.4345	21.5374	+	+	PE3_PE1;PE7_PE1	10	10	0	3.24802	0.000330127	1.43776	9.98668	3.4067	0.000914286	1.44796	10.9722	P31321	KAP1_HUMAN	PRKAR1B	cAMP-dependent protein kinase type I-beta regulatory subunit
22.8589	22.609	22.6299	22.2317	22.1639	22.2428	22.2002	22.428	22.3065	+	+	PE3_PE1;PE7_PE1	43	43	0	2.35938	0.00174362	-0.486467	-5.80844	1.69682	0.00961114	-0.387681	-3.74124	P31327	CPSM_HUMAN	CPS1	Carbamoyl-phosphate synthase [ammonia]
23.9493	23.9667	23.9351	24.588	24.5506	24.5022	24.7507	24.8313	24.8086	+	+	PE3_PE1;PE7_PE1	24	21	0	4.63939	0	0.596574	22.5406	5.29605	0.000334495	0.846495	32.9523	P31350	RIR2_HUMAN	RRM2	Ribonucleoside-diphosphate reductase subunit M2
22.6774	22.7124	22.6379	22.7296	22.6726	22.494	22.6707	22.6634	22.5666				8	8	0	0.231783	0.692651	-0.0438042	-0.590784	0.458773	0.236923	-0.0423425	-1.06295	P31483	TIA1_HUMAN	TIA1	Cytotoxic granule associated RNA binding protein TIA1
18.3054	18.4706	18.2519	18.3045	18.1574	18.1759	18.1531	18.226	18.0194		+	PE7_PE1	9	9	0	0.741287	0.0902976	-0.130018	-1.61585	1.10314	0.0364283	-0.209759	-2.34598	P31512	FMO4_HUMAN	FMO4	Dimethylaniline monooxygenase [N-oxide-forming] 4
21.3797	21.5185	21.5672	22.2868	22.1976	22.2828	22.4155	22.4636	22.3704	+	+	PE3_PE1;PE7_PE1	20	19	0	3.57592	0.000155194	0.767293	12.1243	3.92732	0.000384952	0.928034	14.8982	P31513	FMO3_HUMAN	FMO3	Flavin-containing monooxygenase 3
18.0114	18.0801	18.8219	18.278	16.709	17.9576	18.1175	18.2669	18.0622				5	5	1	0.530914	0.177266	-0.656251	-1.20534	0.228587	0.693979	-0.155599	-0.583681	P31629	ZEP2_HUMAN	HIVEP2	Transcription factor HIVEP2
18.2409	18.8207	18.3706	18.6623	18.8457	18.3968	18.303	18.2327	18.3123				6	5	0	0.291413	0.524136	0.157558	0.720283	0.476105	0.222044	-0.194738	-1.09734	P31641	SC6A6_HUMAN	SLC6A6	Sodium- and chloride-dependent taurine transporter
25.0933	25.0294	25.1235	24.6902	24.6815	24.7016	24.6971	24.769	24.7194	+	+	PE3_PE1;PE7_PE1	19	19	0	3.79683	9.0776e-05	-0.390923	-13.8033	3.27127	0.0009024	-0.353554	-10.1257	P31689	DNJA1_HUMAN	DNAJA1	DnaJ homolog subfamily A member 1
19.6148	19.6536	19.9227	19.7135	19.607	19.4564	19.854	19.9038	19.7952				9	8	0	0.492491	0.203474	-0.138081	-1.12974	0.520412	0.189544	0.120591	1.18472	P31749	AKT1_HUMAN	AKT1	RAC-alpha serine/threonine-protein kinase
21.9823	21.964	21.9678	21.8718	21.6794	21.8564	21.8355	21.7261	21.7324	+	+	PE3_PE1;PE7_PE1	24	18	0	1.27747	0.0222697	-0.168854	-2.72365	2.34515	0.00315539	-0.206701	-5.75643	P31751	AKT2_HUMAN	AKT2	RAC-beta serine/threonine-protein kinase
20.9567	20.9915	20.8294	19.415	19.2013	19.3599	19.3778	19.482	19.2842	+	+	PE3_PE1;PE7_PE1	7	7	0	4.4162	0	-1.60044	-19.8039	4.47294	0.00013205	-1.5445	-20.4669	P31785	IL2RG_HUMAN	IL2RG	Cytokine receptor common subunit gamma
26.0802	26.088	26.1151	25.8454	25.8477	25.8788	25.843	25.9363	25.9115	+	+	PE3_PE1;PE7_PE1	20	20	0	4.0177	0	-0.237124	-15.7055	2.56772	0.00221366	-0.197503	-6.61631	P31930	QCR1_HUMAN	UQCRC1	Cytochrome b-c1 complex subunit 1
23.1531	23.0966	23.1403	23.3495	23.4133	23.3521	23.4889	23.4926	23.4498	+	+	PE3_PE1;PE7_PE1	10	10	0	3.06784	0.000392439	0.241629	8.96824	4.03323	0.000421456	0.347109	15.8484	P31937	3HIDH_HUMAN	HIBADH	3-hydroxyisobutyrate dehydrogenase
26.4431	26.3648	26.4267	26.3319	26.3465	26.3212	26.3645	26.3562	26.3376	+	+	PE3_PE1;PE7_PE1	37	37	0	1.45789	0.0151269	-0.0783564	-3.14015	1.09977	0.0366469	-0.0588036	-2.33888	P31939	PUR9_HUMAN	ATIC	Bifunctional purine biosynthesis protein ATIC
26.9547	27.0214	27.0633	26.5906	26.6728	26.619	26.6283	26.6308	26.6369	+	+	PE3_PE1;PE7_PE1	14	13	0	3.1991	0.000320551	-0.385649	-9.70004	3.56031	0.00075412	-0.381115	-12.0134	P31942	HNRH3_HUMAN	HNRNPH3	Heterogeneous nuclear ribonucleoprotein H3
27.2202	27.205	27.2456	27.2803	27.3037	27.3116	27.2927	27.3802	27.3799	+	+	PE3_PE1;PE7_PE1	15	10	0	2.11178	0.00293722	0.0749461	4.95553	1.81063	0.00745281	0.127314	4.05079	P31943	HNRH1_HUMAN	HNRNPH1	Heterogeneous nuclear ribonucleoprotein H
27.6588	27.5811	27.6164	27.1923	27.2207	27.1399	27.2241	27.2623	27.2286	+	+	PE3_PE1;PE7_PE1	6	6	0	3.73622	8.65318e-05	-0.434501	-13.3216	3.93094	0.000385965	-0.380452	-14.9298	P31946	1433B_HUMAN	YWHAB	14-3-3 protein beta/alpha
26.9833	26.9907	26.9707	27.1582	27.2197	27.185	27.1103	27.1569	27.1651	+	+	PE3_PE1;PE7_PE1	49	49	0	3.4123	0.000139169	0.206039	11.0086	3.07517	0.0011731	0.162498	9.00771	P31948	STIP1_HUMAN	STIP1	Stress-induced-phosphoprotein 1
24.1446	24.2055	24.032	22.3577	22.4516	22.3707	22.2335	22.3076	22.3229	+	+	PE3_PE1;PE7_PE1	5	5	0	5.10709	0	-1.73403	-29.5449	5.23506	0.000305732	-1.83938	-31.8118	P31949	S10AB_HUMAN	S100A11	Protein S100-A11
19.3867	19.4232	19.284	19.3032	19.0237	19.0203	19.2709	19.2684	19.3822	+		PE3_PE1	15	15	0	1.14119	0.0311339	-0.24891	-2.4266	0.440177	0.255217	-0.0575097	-1.02589	P32019	I5P2_HUMAN	INPP5B	Type II inositol 1
27.5102	27.4896	27.5465	28.5125	28.4987	28.4592	28.4165	28.4322	28.3976	+	+	PE3_PE1;PE7_PE1	16	15	0	5.72686	0	0.974707	42.2522	5.88829	0.000727273	0.899988	46.3741	P32119	PRDX2_HUMAN	PRDX2	Peroxiredoxin-2
19.9154	19.782	20.2569	20.8759	21.0477	21.1765	20.7973	21.241	21.0456	+	+	PE3_PE1;PE7_PE1	12	11	0	2.49226	0.00144084	1.04858	6.31338	2.26236	0.00335312	1.04316	5.46127	P32121	ARRB2_HUMAN	ARRB2	Beta-arrestin-2
21.9315	21.757	21.844	21.9306	21.9499	21.935	22.0284	22.0406	22.0599		+	PE7_PE1	23	1	0	0.865173	0.0631069	0.0943025	1.85998	1.74945	0.00831275	0.198759	3.88239	P32189	GLPK_HUMAN	GK	Glycerol kinase
20.6691	20.677	20.5023	21.9504	22.1698	22.0097	22.0341	22.098	22.2544	+	+	PE3_PE1;PE7_PE1	4	4	0	4.09556	0	1.42716	16.4349	4.19675	0.000342362	1.51268	17.4324	P32246	CCR1_HUMAN	CCR1	C-C chemokine receptor type 1
23.3642	23.4495	23.4291	23.3824	23.4065	23.4029	23.261	23.3791	23.4128				10	10	0	0.251044	0.642324	-0.0169748	-0.633212	0.528069	0.184433	-0.0632757	-1.19976	P32321	DCTD_HUMAN	DCTD	Deoxycytidylate deaminase
26.1183	26.1247	26.0975	26.0759	26.0804	25.9986	26.1352	26.2063	26.2149	+	+	PE3_PE1;PE7_PE1	11	11	0	1.04588	0.0395028	-0.0618814	-2.22634	1.27068	0.0245836	0.0719134	2.70853	P32322	P5CR1_HUMAN	PYCR1	Pyrroline-5-carboxylate reductase 1
20.1726	19.6457	20.1335	19.6481	19.5159	19.8227	19.4975	19.2952	19.4043		+	PE7_PE1	6	6	0	0.774566	0.0815385	-0.321704	-1.68105	1.50853	0.0136212	-0.584934	-3.26249	P32519	ELF1_HUMAN	ELF1	ETS-related transcription factor Elf-1
22.274	22.2508	22.3784	22.0393	22.2619	22.3168	22.3177	22.3282	22.3612				15	15	0	0.435883	0.256033	-0.0950979	-1.0173	0.346719	0.38958	0.0346012	0.836229	P32780	TF2H1_HUMAN	GTF2H1	General transcription factor IIH subunit 1
18.9873	19.1633	18.9131	20.3626	20.4875	20.4174	20.8531	20.7261	20.7918	+	+	PE3_PE1;PE7_PE1	14	14	0	4.15144	0	1.40129	16.9787	4.54789	0.000144578	1.76905	21.3764	P32929	CGL_HUMAN	CTH	Cystathionine gamma-lyase
26.7794	26.7244	26.7469	26.4379	26.5027	26.4255	26.4512	26.5312	26.521	+	+	PE3_PE1;PE7_PE1	14	14	0	3.2911	0.000274857	-0.294834	-10.2457	2.95096	0.00135302	-0.24907	-8.35979	P32942	ICAM3_HUMAN	ICAM3	Intercellular adhesion molecule 3
26.3328	26.4761	26.3238	26.3781	26.3447	26.3425	26.2292	26.339	26.2627				10	10	0	0.167457	0.813007	-0.0224838	-0.443926	0.786214	0.0837964	-0.100611	-1.70392	P32969	RL9_HUMAN	RPL9	Large ribosomal subunit protein uL6
27.017	26.8646	26.8125	27.7476	27.673	27.7123	27.6483	27.763	27.6805	+	+	PE3_PE1;PE7_PE1	25	23	0	3.62835	8.02589e-05	0.812935	12.5041	3.46897	0.000839264	0.79924	11.3835	P33121	ACSL1_HUMAN	ACSL1	Long-chain-fatty-acid--CoA ligase 1
23.863	23.8511	23.8658	24.0622	24.0916	24.0709	24.1117	24.137	24.1274	+	+	PE3_PE1;PE7_PE1	66	51	0	4.58653	0	0.214952	21.8605	5.17198	0.000268908	0.265391	30.6737	P33176	KINH_HUMAN	KIF5B	Kinesin-1 heavy chain
23.8676	23.749	23.7754	23.3497	23.5149	23.5039	23.2058	23.4476	23.3909	+	+	PE3_PE1;PE7_PE1	9	9	0	2.21776	0.00240926	-0.341173	-5.30743	2.27947	0.00327328	-0.449247	-5.52124	P33240	CSTF2_HUMAN	CSTF2	Cleavage stimulation factor subunit 2
22.3868	22.2672	22.2676	23.7504	23.7483	23.7895	23.8083	23.8256	23.8114	+	+	PE3_PE1;PE7_PE1	11	11	0	5.38327	0	1.45555	34.6539	5.52217	0.00045283	1.5079	37.5462	P33241	LSP1_HUMAN	LSP1	Lymphocyte-specific protein 1
26.0574	26.0721	26.1536	25.2971	25.44	25.3246	25.2644	25.3365	25.3079	+	+	PE3_PE1;PE7_PE1	10	10	0	3.81691	9.21933e-05	-0.740479	-13.9666	4.5718	0.00014792	-0.791448	-21.6747	P33316	DUT_HUMAN	DUT	Deoxyuridine 5'-triphosphate nucleotidohydrolase
21.3977	21.3716	21.322	21.58	21.4933	21.5784	21.4804	21.5125	21.4914	+	+	PE3_PE1;PE7_PE1	43	41	0	2.17288	0.00249603	0.186783	5.15609	2.25422	0.00337248	0.130945	5.43292	P33527	MRP1_HUMAN	ABCC1	Multidrug resistance-associated protein 1
22.4336	22.655	22.5226	22.6388	22.5761	22.8109	22.7426	22.5174	22.7397				2	2	0	0.657057	0.115351	0.138186	1.45153	0.586872	0.151129	0.129502	1.31478	P33552	CKS2_HUMAN	CKS2	Cyclin-dependent kinases regulatory subunit 2
19.1738	19.3487	19.3308	20.8443	20.97	20.8922	20.8773	21.1062	21.0395	+	+	PE3_PE1;PE7_PE1	22	20	0	4.76969	0	1.61771	24.3074	4.40069	0.000247742	1.72321	19.6264	P33897	ABCD1_HUMAN	ABCD1	ATP-binding cassette sub-family D member 1
22.3147	22.1801	22.1239	23.0131	23.008	23.1277	23.2343	23.2172	23.0314	+	+	PE3_PE1;PE7_PE1	22	21	0	3.5949	0.000156962	0.843359	12.2605	3.42303	0.000927262	0.954726	11.0787	P33908	MA1A1_HUMAN	MAN1A1	Mannosyl-oligosaccharide 1
21.227	21.2987	21.2213	20.9587	20.8178	20.9538	21.1047	21.1788	21.0543	+	+	PE3_PE1;PE7_PE1	21	21	0	2.52908	0.00135034	-0.338895	-6.4597	1.44366	0.0160017	-0.136393	-3.10623	P33981	TTK_HUMAN	TTK	Dual specificity protein kinase TTK
25.6911	25.6392	25.7084	25.4416	25.4547	25.4334	25.4818	25.4877	25.4855	+	+	PE3_PE1;PE7_PE1	46	45	0	3.39383	0.000190476	-0.236337	-10.889	3.13275	0.00116306	-0.194578	-9.32345	P33991	MCM4_HUMAN	MCM4	DNA replication licensing factor MCM4
25.6271	25.6224	25.6423	25.4463	25.4763	25.4673	25.4801	25.5461	25.5097	+	+	PE3_PE1;PE7_PE1	48	48	0	4.0059	0	-0.16729	-15.5977	2.39194	0.00294649	-0.118649	-5.92895	P33992	MCM5_HUMAN	MCM5	DNA replication licensing factor MCM5
25.6685	25.6192	25.6299	25.4502	25.4389	25.4156	25.5522	25.5813	25.539	+	+	PE3_PE1;PE7_PE1	41	41	0	3.45481	0.000142529	-0.20431	-11.2887	1.86009	0.00658799	-0.0816924	-4.1905	P33993	MCM7_HUMAN	MCM7	DNA replication licensing factor MCM7
21.1717	21.2405	21.2403	21.6196	21.7926	21.7129	21.6516	21.722	21.8574	+	+	PE3_PE1;PE7_PE1	14	14	0	3.06016	0.000389982	0.490861	8.92703	2.9084	0.00131588	0.526187	8.14777	P34059	GALNS_HUMAN	GALNS	N-acetylgalactosamine-6-sulfatase
19.0371	18.5167	18.3633	21.1951	20.9011	21.2157	20.884	20.9608	21.1291	+	+	PE3_PE1;PE7_PE1	11	1	0	3.38317	0.000188804	2.46495	10.8205	3.39117	0.000903226	2.35225	10.8719	P34820	BMP8B_HUMAN	BMP8B	Bone morphogenetic protein 8B
21.199	21.1309	21.0427	20.8042	20.8892	20.8604	21.0179	20.8583	20.8833	+	+	PE3_PE1;PE7_PE1	15	15	0	2.21049	0.00246367	-0.272937	-5.28268	1.41799	0.0169348	-0.20437	-3.04551	P34896	GLYC_HUMAN	SHMT1	Serine hydroxymethyltransferase
25.7391	25.6966	25.6938	25.3103	25.292	25.3201	25.4046	25.4299	25.4405	+	+	PE3_PE1;PE7_PE1	28	26	0	4.74383	0	-0.402352	-23.9462	4.01994	0.000417457	-0.284845	-15.726	P34897	GLYM_HUMAN	SHMT2	Serine hydroxymethyltransferase
23.6348	23.7108	23.701	23.6797	23.6554	23.7536	23.418	23.4784	23.4311		+	PE7_PE1	7	7	0	0.136422	0.855221	0.0140311	0.36958	2.86924	0.00137948	-0.239687	-7.95696	P34910	EVI2B_HUMAN	EVI2B	Protein EVI2B
21.4359	21.3951	21.2523	20.9212	20.9883	21.034	21.0316	20.8903	20.8347	+	+	PE3_PE1;PE7_PE1	13	13	0	2.3796	0.00165911	-0.379923	-5.88304	2.26533	0.0033582	-0.442198	-5.47166	P34913	HYES_HUMAN	EPHX2	Bifunctional epoxide hydrolase 2
26.1676	26.2344	26.1399	25.9919	26.0104	25.9834	26.0723	26.0308	26.0606	+	+	PE3_PE1;PE7_PE1	12	1	0	2.50437	0.00141223	-0.185395	-6.36118	1.83369	0.00710504	-0.126057	-4.11552	P34931	HS71L_HUMAN	HSPA1L	Heat shock 70 kDa protein 1-like
25.6233	25.5848	25.6393	25.498	25.5489	25.5252	25.4217	25.4725	25.4597	+	+	PE3_PE1;PE7_PE1	56	53	0	1.8625	0.0055653	-0.0917765	-4.1974	2.75015	0.00168056	-0.164499	-7.40122	P34932	HSP74_HUMAN	HSPA4	Heat shock 70 kDa protein 4
22.6029	22.6854	22.6013	22.8938	22.8178	22.9866	22.8913	22.9098	23.0243	+	+	PE3_PE1;PE7_PE1	14	14	0	2.06348	0.00337682	0.269542	4.80128	2.47248	0.00247486	0.311917	6.23599	P34949	MPI_HUMAN	MPI	Mannose-6-phosphate isomerase
16.8322	17.3761	16.8738	16.6607	17.1005	17.1716	16.6315	16.9073	16.6691				1	1	1	0.0738271	0.929666	-0.0498155	-0.210356	0.679276	0.11364	-0.291412	-1.49482	P35030	TRY3_HUMAN	PRSS3	Trypsin-3
22.9537	22.9412	22.8379	23.617	23.7027	23.5955	23.6558	23.7915	23.5277	+	+	PE3_PE1;PE7_PE1	6	6	0	3.91549	0	0.727488	14.7956	3.04408	0.00124767	0.747368	8.84135	P35080	PROF2_HUMAN	PFN2	Profilin-2
21.4726	21.4325	21.4399	20.3736	20.3085	20.3923	20.3914	20.3934	20.3637	+	+	PE3_PE1;PE7_PE1	34	21	0	5.57149	0	-1.09021	-38.63	6.55784	0.002	-1.06552	-68.2091	P35221	CTNA1_HUMAN	CTNNA1	Catenin alpha-1
23.0694	23.3142	23.257	22.5636	22.6671	22.5872	22.7333	22.5196	22.6576	+	+	PE3_PE1;PE7_PE1	5	3	0	2.7866	0.00079784	-0.607559	-7.56753	2.39853	0.00291704	-0.576698	-5.95357	P35226	BMI1_HUMAN	BMI1	Polycomb complex protein BMI-1
27.5809	27.5425	27.5257	27.4737	27.4756	27.4316	27.5496	27.608	27.5464	+		PE3_PE1	22	22	0	1.83217	0.00588856	-0.0893803	-4.11122	0.285784	0.539852	0.0183029	0.708278	P35232	PHB1_HUMAN	PHB1	Prohibitin 1
23.5521	23.4674	23.5013	22.1429	22.1042	22.1635	22.0348	22.1825	22.1984	+	+	PE3_PE1;PE7_PE1	13	13	0	5.85428	0	-1.3701	-45.4735	4.73017	0.000171429	-1.36842	-23.7575	P35236	PTN7_HUMAN	PTPN7	Tyrosine-protein phosphatase non-receptor type 7
20.1218	20.2213	19.8425	19.9516	19.9027	20.1535	20.1232	20.0896	20.133				15	13	0	0.162747	0.819332	-0.0592575	-0.432809	0.177771	0.791815	0.0534229	0.468081	P35240	MERL_HUMAN	NF2	Merlin
24.4992	24.4989	24.4631	25.0928	25.1267	25.0676	24.972	24.9679	24.9586	+	+	PE3_PE1;PE7_PE1	24	24	0	5.08264	0	0.608618	29.1305	5.54237	0.000461538	0.479107	37.9865	P35241	RADI_HUMAN	RDX	Radixin
25.0152	24.9265	24.9644	24.1414	24.0528	24.1605	24.0523	23.9835	24.14	+	+	PE3_PE1;PE7_PE1	7	7	0	4.45609	0	-0.850474	-20.2678	4.20196	0.000343478	-0.910095	-17.4854	P35244	RFA3_HUMAN	RPA3	Replication protein A 14 kDa subunit
23.7358	23.659	23.7161	23.4406	23.3871	23.4254	23.5126	23.5195	23.5542	+	+	PE3_PE1;PE7_PE1	23	23	0	3.28472	0.000273859	-0.285936	-10.2069	2.57006	0.00218373	-0.174883	-6.62592	P35249	RFC4_HUMAN	RFC4	Replication factor C subunit 4
23.6533	23.6482	23.6834	23.3245	23.3937	23.3623	23.4454	23.4068	23.4296	+	+	PE3_PE1;PE7_PE1	16	16	0	3.72192	8.57538e-05	-0.301474	-13.2104	3.93131	0.000386304	-0.234421	-14.933	P35250	RFC2_HUMAN	RFC2	Replication factor C subunit 2
21.9402	21.8418	21.9362	22.0087	21.9356	21.8928	22.0012	21.9098	22.0375				41	41	0	0.35327	0.372396	0.0396633	0.849751	0.704192	0.105544	0.0768191	1.54339	P35251	RFC1_HUMAN	RFC1	Replication factor C subunit 1
27.5099	27.5442	27.4894	28.0821	28.0437	28.003	28.0653	28.071	27.9316	+	+	PE3_PE1;PE7_PE1	4	4	0	4.34154	0	0.528412	18.9636	3.33722	0.000868217	0.50815	10.5299	P35268	RL22_HUMAN	RPL22	Large ribosomal subunit protein eL22
23.0753	23.1103	23.1039	23.0538	23.1038	22.9864	22.9297	23.0401	23.079				20	20	0	0.609334	0.135624	-0.0484467	-1.35858	0.806965	0.0797201	-0.0802066	-1.74476	P35269	T2FA_HUMAN	GTF2F1	General transcription factor IIF subunit 1
22.2385	22.2867	22.2683	23.4277	23.4627	23.4582	23.4694	23.5034	23.5157	+	+	PE3_PE1;PE7_PE1	14	14	0	6.51332	0	1.18501	66.482	6.40513	0.00154839	1.23163	62.4648	P35270	SPRE_HUMAN	SPR	Sepiapterin reductase
18.59	19.057	19.0438	20.1202	20.0525	19.97	19.9347	19.9099	19.919	+	+	PE3_PE1;PE7_PE1	15	14	0	2.70776	0.000940828	1.15063	7.2119	2.57945	0.00215839	1.02427	6.66451	P35354	PGH2_HUMAN	PTGS2	Prostaglandin G/H synthase 2
20.1494	19.7826	20.3218	18.7449	18.9389	18.643	19.3105	19.1243	19.2746	+	+	PE3_PE1;PE7_PE1	5	4	0	2.71106	0.000942571	-1.30905	-7.22649	2.13202	0.0041328	-0.848167	-5.02126	P35443	TSP4_HUMAN	THBS4	Thrombospondin-4
23.9341	23.9142	23.8902	23.3657	23.4345	23.3941	23.5974	23.5812	23.6086	+	+	PE3_PE1;PE7_PE1	20	20	0	4.57923	0	-0.514761	-21.7682	4.53127	0.000142012	-0.317094	-21.1713	P35520	CBS_HUMAN	CBS	Cystathionine beta-synthase
22.5751	22.5093	22.4628	22.656	22.8381	22.7719	22.5837	22.6681	22.738	+	+	PE3_PE1;PE7_PE1	21	21	0	1.73344	0.0076152	0.239587	3.83909	1.25334	0.0254142	0.147545	2.67006	P35568	IRS1_HUMAN	IRS1	Insulin receptor substrate 1
21.5061	21.4101	21.432	20.6642	20.7501	20.6821	20.5804	20.6875	20.6464	+	+	PE3_PE1;PE7_PE1	48	48	0	4.36219	0	-0.750628	-19.1924	4.34836	0.000236745	-0.811336	-19.0389	P35573	GDE_HUMAN	AGL	Glycogen debranching enzyme
25.7903	25.8145	25.831	25.996	26.017	26.012	25.9172	25.9579	25.9628	+	+	PE3_PE1;PE7_PE1	135	109	0	3.89894	0	0.196409	14.6531	2.70304	0.00175958	0.134056	7.19107	P35579	MYH9_HUMAN	MYH9	Myosin-9
22.3509	22.358	22.3469	22.9708	23.0099	23.0105	22.9999	22.9933	22.9825	+	+	PE3_PE1;PE7_PE1	86	79	0	5.93892	0	0.645167	47.7475	7.3304	0	0.640001	106.433	P35580	MYH10_HUMAN	MYH10	Myosin-10
25.6434	25.6269	25.6102	25.6196	25.6538	25.5922	25.6453	25.6943	25.6648		+	PE7_PE1	48	48	0	0.0870553	0.914626	-0.00496483	-0.24521	1.13258	0.0341445	0.0413017	2.40828	P35606	COPB2_HUMAN	COPB2	Coatomer subunit beta'
23.1708	23.0576	23.2294	22.9606	23.0373	23.0869	22.8146	22.8609	22.8463		+	PE7_PE1	17	17	0	0.931588	0.0525412	-0.124341	-1.99291	2.40368	0.00288832	-0.312005	-5.97288	P35610	SOAT1_HUMAN	SOAT1	Sterol O-acyltransferase 1
22.3515	22.3637	22.3371	22.174	22.1496	22.1104	22.0579	22.0613	22.1498	+	+	PE3_PE1;PE7_PE1	19	18	0	3.29785	0.000275574	-0.206106	-10.2868	2.96056	0.00136308	-0.261131	-8.4083	P35611	ADDA_HUMAN	ADD1	Alpha-adducin
18.2298	17.5209	18.0903	18.8507	18.6432	18.3449	18.4298	18.9015	18.7274	+	+	PE3_PE1;PE7_PE1	8	8	0	1.19554	0.0272058	0.665935	2.54345	1.34581	0.0202585	0.7392	2.87806	P35612	ADDB_HUMAN	ADD2	Beta-adducin
25.4133	25.4969	25.4685	25.8044	25.908	25.8698	25.8077	25.8506	25.7903	+	+	PE3_PE1;PE7_PE1	10	10	0	3.30035	0.000275862	0.401185	10.3021	3.5214	0.000791321	0.356701	11.7411	P35613	BASI_HUMAN	BSG	Basigin
21.1001	20.8666	20.8808	19.9411	19.6597	19.7277	20.4405	20.3249	20.2549	+	+	PE3_PE1;PE7_PE1	4	4	0	3.3047	0.00027673	-1.17303	-10.3287	2.55204	0.00219521	-0.609088	-6.55235	P35625	TIMP3_HUMAN	TIMP3	Metalloproteinase inhibitor 3
25.5731	25.744	25.787	25.3588	25.32	25.5586	25.5042	25.6042	25.5799	+		PE3_PE1	8	8	0	1.36805	0.0178613	-0.288926	-2.92917	0.898881	0.062541	-0.13865	-1.92723	P35637	FUS_HUMAN	FUS	RNA-binding protein FUS
23.1054	23.0956	23.1287	22.6328	22.678	22.6204	22.651	22.6866	22.6318	+	+	PE3_PE1;PE7_PE1	57	57	0	4.69092	0	-0.466143	-23.2237	4.75458	0.000175503	-0.453438	-24.0957	P35658	NU214_HUMAN	NUP214	Nuclear pore complex protein Nup214
23.9906	23.8678	23.8734	22.3204	22.344	22.3744	22.2853	22.3229	22.2856	+	+	PE3_PE1;PE7_PE1	12	12	0	5.46786	0	-1.56428	-36.3878	5.56323	0.000477612	-1.61265	-38.4464	P35659	DEK_HUMAN	DEK	Protein DEK
25.6754	25.6164	25.489	25.3773	25.3796	25.3297	25.4578	25.5118	25.4393	+	+	PE3_PE1;PE7_PE1	5	5	0	1.8045	0.00645312	-0.231417	-4.0337	0.982029	0.0495452	-0.123962	-2.09513	P35754	GLRX1_HUMAN	GLRX	Glutaredoxin-1
17.8313	17.6851	17.9588	18.3453	18.7543	18.604	18.7578	18.8559	18.1188	+	+	PE3_PE1;PE7_PE1	6	6	0	2.18152	0.00250313	0.742786	5.18497	1.43283	0.0164441	0.752443	3.08055	P35790	CHKA_HUMAN	CHKA	Choline kinase alpha
21.2185	21.2091	21.2221	20.8918	21.0231	20.8644	20.9943	20.9237	20.9629	+	+	PE3_PE1;PE7_PE1	14	14	0	2.38566	0.00166687	-0.290138	-5.90555	3.60465	0.00070765	-0.256253	-12.331	P35813	PPM1A_HUMAN	PPM1A	Protein phosphatase 1A
23.4905	23.5277	23.5301	23.5899	23.5302	23.5218	23.7034	23.7283	23.6769		+	PE7_PE1	13	11	0	0.552808	0.164125	0.0311909	1.24823	3.16811	0.00108471	0.186717	9.52239	P35914	HMGCL_HUMAN	HMGCL	Hydroxymethylglutaryl-CoA lyase
25.2072	25.2537	25.2901	25.2208	25.2608	25.2295	25.1933	25.2324	25.2313				31	31	0	0.189388	0.779265	-0.0133095	-0.494988	0.503579	0.201148	-0.0313295	-1.15161	P35998	PRS7_HUMAN	PSMC2	26S proteasome regulatory subunit 7
21.9141	21.8785	21.9496	21.7228	21.8072	21.8328	21.8599	21.866	21.5749	+		PE3_PE1	5	5	0	1.49902	0.0136528	-0.126483	-3.23933	0.681264	0.113054	-0.147177	-1.49869	P36404	ARL2_HUMAN	ARL2	ADP-ribosylation factor-like protein 2
24.0252	23.9451	24.0002	23.9169	23.8731	23.9021	23.8865	23.84	23.8668	+	+	PE3_PE1;PE7_PE1	9	9	0	1.58252	0.0110215	-0.0927855	-3.44598	2.00445	0.00506269	-0.125739	-4.61772	P36405	ARL3_HUMAN	ARL3	ADP-ribosylation factor-like protein 3
24.7889	24.7355	24.7409	25.1614	25.2377	25.2066	25.2634	25.2365	25.2491	+	+	PE3_PE1;PE7_PE1	28	21	0	4.05125	0	0.446809	16.0158	4.91883	0.000210526	0.494549	26.4983	P36507	MP2K2_HUMAN	MAP2K2	Dual specificity mitogen-activated protein kinase kinase 2
26.5741	26.5578	26.5732	26.8249	26.8858	26.902	26.8274	26.9044	26.9443	+	+	PE3_PE1;PE7_PE1	13	13	0	3.63783	8.08871e-05	0.302546	12.5739	3.13241	0.00116249	0.323685	9.32157	P36542	ATPG_HUMAN	ATP5F1C	ATP synthase subunit gamma
24.2433	24.2403	24.188	24.3251	24.3734	24.2853	24.3362	24.3148	24.2992	+	+	PE3_PE1;PE7_PE1	11	6	0	1.54011	0.0121814	0.104057	3.3401	1.94537	0.00565379	0.0928472	4.43925	P36543	VATE1_HUMAN	ATP6V1E1	V-type proton ATPase subunit E 1
24.2741	24.3446	24.3211	24.722	24.7293	24.7126	24.7377	24.7785	24.7267	+	+	PE3_PE1;PE7_PE1	25	25	0	4.36123	0	0.408001	19.1818	4.12212	0.000327801	0.434384	16.6912	P36551	HEM6_HUMAN	CPOX	Oxygen-dependent coproporphyrinogen-III oxidase
26.4302	26.4919	26.422	26.4306	26.5156	26.4803	26.1897	26.2105	26.2527		+	PE7_PE1	22	22	0	0.343472	0.391593	0.0274455	0.829512	2.87704	0.0012908	-0.230405	-7.99463	P36578	RL4_HUMAN	RPL4	Large ribosomal subunit protein uL4
23.0864	23.0182	23.1018	22.9376	22.8875	22.9038	23.0093	23.006	22.9593	+	+	PE3_PE1;PE7_PE1	6	6	0	2.23775	0.00226671	-0.159172	-5.37595	1.19668	0.0286578	-0.0772438	-2.54592	P36639	8ODP_HUMAN	NUDT1	Oxidized purine nucleoside triphosphate hydrolase
25.6347	25.6679	25.7026	25.8217	25.8556	25.8177	25.8962	25.9277	25.9452	+	+	PE3_PE1;PE7_PE1	45	45	0	2.68217	0.000974116	0.163225	7.0997	3.33069	0.00086582	0.254585	10.4893	P36776	LONM_HUMAN	LONP1	Lon protease homolog
24.6105	24.6839	24.6686	24.5982	24.6439	24.5845	24.5335	24.5525	24.5911		+	PE7_PE1	28	28	0	0.725912	0.0941952	-0.0454585	-1.58579	1.56329	0.0120749	-0.0953121	-3.39773	P36871	PGM1_HUMAN	PGM1	Phosphoglucomutase-1
24.1355	24.0214	24.0607	24.3273	24.2774	24.2631	24.332	24.2812	24.2427	+	+	PE3_PE1;PE7_PE1	3	3	0	2.3016	0.00198387	0.216763	5.59961	2.13504	0.00410885	0.21279	5.03113	P36873	PP1G_HUMAN	PPP1CC	Serine/threonine-protein phosphatase PP1-gamma catalytic subunit
22.1994	22.0596	22.0861	22.0814	22.1368	22.1313	22.1396	22.1445	22.1944				25	25	0	0.010248	0.990764	0.00144196	0.0311006	0.407302	0.293452	0.0444597	0.959887	P36915	GNL1_HUMAN	GNL1	Guanine nucleotide-binding protein-like 1
22.0731	22.0361	21.9481	21.6979	21.6598	21.7492	22.0092	21.928	22.0989	+		PE3_PE1	6	6	0	2.65995	0.000963577	-0.316774	-7.00353	0.0388224	0.96288	-0.0070591	-0.114328	P36954	RPB9_HUMAN	POLR2I	DNA-directed RNA polymerase II subunit RPB9
21.5563	21.4932	21.304	20.5821	20.2929	20.483	20.6145	20.6996	20.6219	+	+	PE3_PE1;PE7_PE1	4	4	0	3.03136	0.00038296	-0.99848	-8.77408	3.25086	0.000943891	-0.805842	-10.0036	P36955	PEDF_HUMAN	SERPINF1	Pigment epithelium-derived factor
24.1925	24.0045	24.1563	23.8769	23.8739	23.8461	23.9279	23.9308	23.9512	+	+	PE3_PE1;PE7_PE1	14	14	0	1.90365	0.00514184	-0.252154	-4.31629	1.44974	0.0157438	-0.181164	-3.1207	P36957	ODO2_HUMAN	DLST	Dihydrolipoyllysine-residue succinyltransferase component of 2-oxoglutarate dehydrogenase complex
18.4115	18.6205	18.8738	20.0359	20.0863	19.939	19.8076	19.7587	19.9652	+	+	PE3_PE1;PE7_PE1	9	9	0	3.22642	0.000325187	1.38511	9.85913	2.91801	0.00132427	1.20856	8.19519	P36959	GMPR1_HUMAN	GMPR	GMP reductase 1
25.499	25.4503	25.5423	25.4336	25.4495	25.4071	25.3866	25.4918	25.4005	+		PE3_PE1	12	12	0	1.07573	0.0368394	-0.0671298	-2.28847	0.771111	0.0873953	-0.0709489	-1.67427	P36969	GPX4_HUMAN	GPX4	Phospholipid hydroperoxide glutathione peroxidase GPX4
26.4751	26.4684	26.4614	25.8771	25.883	25.8572	25.8157	25.8179	25.7834	+	+	PE3_PE1;PE7_PE1	9	9	0	6.5534	0	-0.595834	-68.0348	6.2139	0.00112941	-0.662608	-55.9478	P37108	SRP14_HUMAN	SRP14	Signal recognition particle 14 kDa protein
23.5489	23.5518	23.5544	23.6487	23.7704	23.6798	23.6288	23.731	23.6295	+	+	PE3_PE1;PE7_PE1	13	13	0	1.80918	0.00631744	0.147888	4.04674	1.51423	0.0134084	0.111386	3.27642	P37198	NUP62_HUMAN	NUP62	Nuclear pore glycoprotein p62
23.8563	23.747	23.7594	23.4051	23.3546	23.2616	23.3158	23.2991	23.2919	+	+	PE3_PE1;PE7_PE1	14	6	0	2.92218	0.000490099	-0.447137	-8.21583	3.79011	0.000624901	-0.485286	-13.7491	P37235	HPCL1_HUMAN	HPCAL1	Hippocalcin-like protein 1
20.6736	20.7414	20.5942	21.2984	21.3085	21.3192	21.2926	21.1643	21.2818	+	+	PE3_PE1;PE7_PE1	17	17	0	3.92426	0	0.638963	14.8716	3.20737	0.00105166	0.57649	9.74796	P37268	FDFT_HUMAN	FDFT1	Squalene synthase
20.5539	20.1426	19.1121	20.2318	20.41	20.4455	20.7724	20.2019	20.0376				7	7	0	0.418459	0.275315	0.426235	0.982362	0.343776	0.395346	0.401108	0.830141	P37275	ZEB1_HUMAN	ZEB1	Zinc finger E-box-binding homeobox 1
26.2573	26.3102	26.3669	26.4779	26.5822	26.5617	26.2669	26.4302	26.429	+		PE3_PE1	15	14	0	2.15588	0.00262162	0.229126	5.09966	0.43569	0.25967	0.0638625	1.01692	P37802	TAGL2_HUMAN	TAGLN2	Transgelin-2
26.6072	26.5318	26.5679	26.5329	26.5924	26.5609	26.4954	26.547	26.5162				19	19	0	0.0886192	0.912829	-0.00691732	-0.249284	0.870259	0.0674543	-0.0494207	-1.8701	P37837	TALDO_HUMAN	TALDO1	Transaldolase
25.5902	25.5483	25.5678	25.8113	25.8763	25.8247	25.9268	25.9558	25.9463	+	+	PE3_PE1;PE7_PE1	18	18	0	3.49604	0.000146919	0.268666	11.5668	4.83881	0.000196319	0.374191	25.2996	P38117	ETFB_HUMAN	ETFB	Electron transfer flavoprotein subunit beta
26.8894	26.7936	26.8275	26.6086	26.6563	26.6287	26.601	26.6591	26.6195	+	+	PE3_PE1;PE7_PE1	25	7	0	2.55889	0.00128387	-0.205644	-6.58024	2.51403	0.00237982	-0.210285	-6.39954	P38159	RBMX_HUMAN	RBMX	RNA-binding motif protein
22.0519	21.9519	22.0577	21.2265	21.2386	20.9634	21.2202	21.2015	21.0294	+	+	PE3_PE1;PE7_PE1	31	31	0	3.09724	0.000342541	-0.877642	-9.12751	3.62409	0.000719444	-0.87009	-12.4728	P38398	BRCA1_HUMAN	BRCA1	Breast cancer type 1 susceptibility protein
22.7644	22.7544	22.7773	23.0431	23.0378	23.0479	23.0472	23.031	23.0626	+	+	PE3_PE1;PE7_PE1	20	20	0	5.55909	0	0.277587	38.3547	4.81834	0.000192771	0.281557	25.0016	P38432	COIL_HUMAN	COIL	Coilin
[truncated: 5,830 more rows]

## Sheet: PE3_PE1
Protein.Group	Genes	First.Protein.Description	Student's T-test Significant PE3_PE1	-Log Student's T-test p-value PE3_PE1	Student's T-test q-value PE3_PE1	Student's T-test Difference PE3_PE1
[truncated: 7,590 more rows]

[truncated: 1 more sheets: PE7_PE1]
